# Supplementary material for: Genome-Wide Association Study Identifies That the ABO Blood Group System Influences Interleukin-10 Levels and the Risk of Clinical Events in Patients with Acute Coronary Syndrome
Source: PLoS One. 2015 Nov 24;10(11):e0142518. doi: 10.1371/journal.pone.0142518 (PMC4658192; doi:10.1371/journal.pone.0142518)
Supplement: S3 Table — The table show the GWAS results for ACS patients and controls separately as well as the results for the two cohorts pooled together. (XLSX) [file pone.0142518.s007.xlsx]

## Sheet: Heading and legends
S3 Table. GWAS results for all SNPs. The tables show the GWAS results for ACS patients and controls separately as well as the results for the two cohort pooled together.

## Sheet: ASC patient
SNP	Chromosome	Position (Buile 36)	Minor (effective) allele	Minor allele frequency	N	Beta	SE beta	P-value	P-value (Genomic controll corrected)	P-value (hwe exact test)	SNP call rate
rs1815606	1	1130298	A	0.323786	2863	0.00184626	0.026591	0.944646	0.945671	0.932027	0.999651
rs6603811	1	1695996	A	0.0581558	2863	-0.0042244	-0.053874	0.9375	0.938657	0.302233	0.999651
rs7531583	1	1696020	A	0.218302	2863	-0.0516969	-0.0300658	0.0855307	0.0914929	0.784242	0.999651
rs12044597	1	1698661	G	0.494937	2864	-0.00586766	-0.0249309	0.813932	0.81732	0.94041	1
rs9660180	1	1712891	A	0.490398	2864	-0.000516491	-0.0249917	0.983512	0.983817	0.736593	1
rs6603803	1	1802548	G	0.494041	2853	-0.000731314	-0.0249479	0.976614	0.977048	1	0.996159
rs6688000	1	1813782	A	0.0487081	2864	-0.00350502	-0.0582363	0.952007	0.952896	0.684156	1
rs2803328	1	1864186	G	0.491093	2863	-0.00623418	-0.0250322	0.803325	0.806899	0.65366	0.999651
rs2803291	1	1882185	A	0.156075	2864	-0.0361068	-0.0343721	0.293503	0.302546	1	1
rs10910029	1	2025239	A	0.379322	2863	0.00619673	0.0254192	0.8074	0.810903	0.302185	0.999651
rs425277	1	2059032	A	0.292074	2864	0.00212688	0.027206	0.937687	0.93884	0.497882	1
rs2460002	1	2109693	A	0.319658	2864	-0.0142728	-0.0264629	0.589645	0.596564	0.32347	1
rs380190	1	2132378	C	0.306818	2860	-0.0107251	-0.0268304	0.68935	0.694818	0.454817	0.998603
rs260513	1	2170384	A	0.463285	2819	0.00333518	0.0249635	0.893717	0.895676	0.404931	0.984288
rs10797416	1	2172202	G	0.395426	2864	-0.00185779	-0.0255258	0.941981	0.943055	0.845113	1
rs12385717	1	2174715	C	0.0619763	2864	0.047278	0.0518247	0.361628	0.3706	0.872737	1
rs7553178	1	2194615	G	0.304469	2864	-0.0353047	-0.027476	0.198816	0.207271	0.112144	1
rs2645091	1	2214505	A	0.135348	2863	0.0621992	0.0361569	0.0853855	0.0913424	0.472083	0.999651
rs1809822	1	2221455	C	0.0684859	2840	-0.00370247	-0.0499892	0.940958	0.942051	0.379921	0.99162
rs12080256	1	2241217	A	0.210168	2862	0.0462641	0.0302734	0.12646	0.133647	0.28468	0.999302
rs2055204	1	2270521	G	0.46648	2864	0.00964474	0.0248338	0.697741	0.703077	0.573345	1
rs2840542	1	2281540	A	0.232006	2862	-0.00543609	-0.0295942	0.854259	0.856932	0.79311	0.999302
rs10910077	1	2380191	A	0.286238	2863	0.0019664	0.0273441	0.942671	0.943732	0.385073	0.999651
rs6668720	1	2410773	A	0.392458	2864	-0.0531675	-0.0253503	0.035966	0.0395498	0.583532	1
rs2281852	1	2483476	A	0.459846	2864	-0.0286652	-0.0250051	0.25164	0.26054	1	1
rs2257763	1	2483520	A	0.464838	2844	-0.0302441	-0.0251136	0.228476	0.237221	0.821091	0.993017
rs11589185	1	2531587	A	0.106055	2857	0.0276466	0.041165	0.501835	0.509799	0.0756141	0.997556
rs4648360	1	2713205	A	0.459483	2863	-8.19192e-05	-0.0248258	0.997367	0.997416	0.47478	0.999651
rs7538063	1	2715812	A	0.14306	2810	0.0386345	0.0361261	0.284874	0.2939	0.538241	0.981145
rs10909880	1	2717664	A	0.462632	2850	0.0019308	0.0248735	0.938127	0.939272	0.451289	0.995112
rs1869970	1	2819411	G	0.208101	2864	-0.00893231	-0.0302903	0.768078	0.772259	0.173779	1
rs4648432	1	2829617	C	0.274616	2864	-0.0282073	-0.0276232	0.307186	0.316243	0.30226	1
rs2045331	1	2832130	A	0.275663	2864	-0.0273688	-0.0275597	0.320673	0.329729	0.242453	1
rs4648445	1	2880205	G	0.31761	2862	0.0152197	0.0265209	0.56605	0.573274	0.342705	0.999302
rs1138513	1	2966676	G	0.188547	2864	-0.0145767	-0.0319332	0.648049	0.654147	0.760386	1
rs7525173	1	2986056	C	0.477828	2864	-0.0172237	-0.0249992	0.490844	0.498919	0.851494	1
rs876740	1	3027473	A	0.367842	2864	0.0201649	0.0255959	0.430805	0.439401	0.3556	1
rs2651902	1	3064166	A	0.169403	2863	-0.0235553	-0.0333678	0.480231	0.48841	0.64189	0.999651
rs17390062	1	3079709	G	0.0864176	2864	0.0638732	0.0440434	0.146993	0.154637	0.552957	1
rs2817138	1	3095136	A	0.129365	2864	-0.00615341	-0.0369907	0.867881	0.870309	0.739836	1
rs2651912	1	3100595	A	0.317039	2864	0.0100125	0.0265998	0.706609	0.711805	0.489966	1
rs12095716	1	3107538	C	0.196927	2864	-0.024352	-0.0310381	0.432697	0.441278	0.344751	1
rs2817148	1	3127996	G	0.015014	2864	-0.0867175	-0.10077	0.389484	0.398337	0.132734	1
rs10158583	1	3133928	A	0.0684836	2862	-0.0409474	-0.0499247	0.412111	0.420834	0.240214	0.999302
rs1553288	1	3134605	A	0.0574773	2862	-0.0217357	-0.0545069	0.690063	0.69552	0.0579672	0.999302
rs10492940	1	3187607	A	0.11889	2864	0.0142924	0.0387604	0.712324	0.717428	0.475615	1
rs4648376	1	3199491	G	0.447626	2864	-0.00520865	-0.0252253	0.836412	0.839404	0.472854	1
rs2500294	1	3199627	G	0.431041	2864	-0.00342749	-0.025375	0.892554	0.894534	0.380871	1
rs7553849	1	3204030	A	0.213338	2864	-0.0131148	-0.0303574	0.665733	0.671565	0.867339	1
rs12743017	1	3219045	A	0.07562	2863	-0.0363036	-0.0475575	0.445247	0.453733	0.285179	0.999651
rs2483289	1	3254050	A	0.303073	2864	-0.00692612	-0.0269871	0.797453	0.801129	0.658403	1
rs946758	1	3262923	A	0.378581	2862	-0.0326407	-0.025822	0.206206	0.214744	0.578297	0.999302
rs2493275	1	3297894	A	0.0827199	2853	0.0210415	0.0454597	0.643464	0.649629	0.805321	0.996159
rs2493292	1	3318519	A	0.155377	2864	-0.0164766	-0.0336994	0.624893	0.631326	0.0270835	1
rs2493264	1	3343809	A	0.0759427	2864	0.0230056	0.0479206	0.631173	0.637516	0.0452802	1
rs4431782	1	3480967	G	0.091655	2864	-0.0455799	-0.0426286	0.284965	0.293992	0.178135	1
rs3765690	1	3554678	A	0.0583304	2863	0.0238762	0.0531166	0.653067	0.65909	0.864863	0.999651
rs7515164	1	3644607	A	0.0501047	2864	-0.0117505	-0.0571209	0.837015	0.839996	1	1
rs1181871	1	3674181	A	0.45618	2864	0.002778	0.0252306	0.912327	0.913946	0.386361	1
rs1175549	1	3681587	C	0.233589	2864	0.00132361	0.0288843	0.96345	0.964128	0.0417306	1
rs10492943	1	3755284	A	0.162884	2864	-0.0083087	-0.0334165	0.803639	0.807208	0.337366	1
rs12757243	1	3802470	A	0.0111771	2863	0.0081107	0.119181	0.945743	0.946748	1	0.999651
rs12046333	1	3910202	G	0.0520615	2862	0.0452524	0.0558281	0.417614	0.426302	0.57024	0.999302
rs11587331	1	3939756	G	0.42493	2864	0.00471155	0.0252732	0.852112	0.854823	0.759855	1
rs4378174	1	3980745	A	0.139839	2864	0.0137088	0.0355905	0.700104	0.705402	0.351183	1
rs12026862	1	3985403	G	0.0122207	2864	-0.205777	-0.110767	0.0632051	0.0682585	0.0654734	1
rs3856168	1	4016464	A	0.072102	2864	0.0288011	0.0482508	0.550571	0.557986	1	1
rs10799180	1	4022324	A	0.141281	2810	0.0199529	0.0365683	0.585317	0.592293	0.24303	0.981145
rs9628649	1	4031878	G	0.365398	2864	0.0267004	0.0255137	0.295324	0.30437	0.158501	1
rs6688343	1	4131617	G	0.361906	2864	0.0174092	0.0261981	0.506357	0.514274	0.274613	1
rs12402543	1	4171999	A	0.134777	2864	0.0259797	0.0363224	0.474452	0.482685	0.63062	1
rs17448695	1	4267670	A	0.0865922	2864	-0.0526891	-0.0443144	0.234446	0.243236	1	1
rs12408633	1	4280363	G	0.0466131	2864	0.0525362	0.0598207	0.37982	0.38872	0.210457	1
rs523634	1	4307845	G	0.228701	2864	0.028962	0.0298383	0.331731	0.340776	0.491411	1
rs349413	1	4344566	C	0.273315	2863	0.0311794	0.0277352	0.260937	0.269883	0.451571	0.999651
rs1762818	1	4386470	A	0.0064595	2864	0.216889	0.15586	0.164053	0.172013	1	1
rs350173	1	4446043	A	0.0746243	2861	0.0156994	0.0476082	0.741579	0.746205	0.685735	0.998953
rs350176	1	4447090	A	0.137744	2864	-0.0373968	-0.0354146	0.290981	0.30002	0.0336131	1
rs780614	1	4451539	G	0.231844	2864	-0.0073407	-0.0293916	0.802777	0.806361	0.67473	1
rs4480324	1	4472959	A	0.274013	2863	0.000789337	0.0276369	0.977215	0.977637	0.259664	0.999651
rs1024139	1	4540762	G	0.180866	2864	-0.000170383	-0.0323075	0.995792	0.99587	0.850092	1
rs241224	1	4541659	C	0.0530726	2864	-0.00560523	-0.0561712	0.920512	0.921982	0.349945	1
rs164780	1	4566354	G	0.282996	2864	-0.0444291	-0.0276034	0.107496	0.114175	0.890136	1
rs6703429	1	4572615	G	0.311321	2862	-0.0026532	-0.0270211	0.921781	0.923227	0.600972	0.999302
rs6426432	1	4621067	G	0.244064	2864	-0.0164525	-0.0291408	0.572354	0.579497	0.612531	1
rs2035454	1	4622291	G	0.298883	2864	0.0196686	0.0275679	0.475562	0.483785	0.166966	1
rs10915584	1	4636316	C	0.444483	2864	-0.00798281	-0.0246244	0.7458	0.750355	0.0584891	1
rs10915587	1	4646496	G	0.383564	2817	-0.0131144	-0.0256172	0.608695	0.615356	0.402851	0.983589
rs11805709	1	4747454	A	0.286487	2864	-0.0158815	-0.0275338	0.564074	0.571323	0.927198	1
rs12410445	1	4767710	C	0.0610526	2850	0.0119029	0.0519236	0.818683	0.821989	0.622922	0.995112
rs17345447	1	4836912	G	0.0672137	2864	-0.0845605	-0.0492073	0.0857138	0.0916826	0.230983	1
rs10915668	1	4873161	A	0.416696	2863	-0.00933109	-0.0252371	0.711579	0.716694	0.877858	0.999651
rs2898852	1	4886464	A	0.175454	2864	0.0332219	0.0328408	0.311726	0.320784	0.846333	1
rs11586643	1	4888791	A	0.00541201	2864	-0.421997	-0.169995	0.01305	0.0148355	1	1
rs12041887	1	4902030	G	0.0226955	2864	0.0583738	0.0833152	0.483529	0.491676	0.657228	1
rs11581023	1	4936409	A	0.154679	2864	0.0368175	0.0347313	0.289114	0.29815	0.391066	1
rs6657381	1	4938953	A	0.292423	2864	-0.0854742	-0.0272842	0.00173186	0.00210755	0.85668	1
rs6689504	1	4980293	C	0.221892	2864	-0.0927732	-0.029685	0.00177651	0.00216002	0.386714	1
rs17366825	1	5146223	A	0.0503321	2861	0.0718468	0.0570491	0.207891	0.216447	1	0.998953
rs16840177	1	5167643	A	0.0485335	2864	0.0653658	0.0576553	0.256906	0.265832	0.543845	1
rs10915379	1	5169100	G	0.451782	2862	0.00568016	0.0249756	0.820091	0.823371	0.850336	0.999302
rs583170	1	5234274	C	0.494237	2863	0.0209449	0.0247319	0.397063	0.405875	0.477557	0.999651
rs678476	1	5247839	A	0.467528	2864	0.0342853	0.0247878	0.166617	0.17462	0.499488	1
rs12125043	1	5249200	A	0.493361	2862	0.0370323	0.0244982	0.130628	0.137915	0.0853864	0.999302
rs9439519	1	5264494	G	0.391061	2864	-0.00165763	-0.0252866	0.947733	0.948701	0.307821	1
rs12737164	1	5270829	C	0.025838	2864	-0.105181	-0.0789692	0.182886	0.191137	1	1
rs12040942	1	5271019	C	0.426327	2864	0.000391672	0.0248583	0.987429	0.987662	0.157685	1
rs12131421	1	5395213	A	0.0466131	2864	0.0119142	0.0586513	0.839028	0.841973	0.400478	1
rs6603840	1	5409485	A	0.040852	2864	0.0312542	0.0625905	0.617537	0.624074	0.475454	1
rs10796404	1	5465256	A	0.190293	2864	0.0216209	0.0321575	0.501365	0.509333	0.163414	1
rs11260699	1	5474026	A	0.224686	2864	0.021605	0.0301565	0.473727	0.481966	0.283276	1
rs1775403	1	5559319	G	0.38949	2864	0.0332722	0.025441	0.190935	0.199294	0.723696	1
rs1775421	1	5564169	A	0.0675628	2864	0.0284099	0.0493373	0.56473	0.57197	0.551799	1
rs13376100	1	5578656	A	0.180754	2863	0.00706976	0.0318039	0.824086	0.827296	0.0580471	0.999651
rs707583	1	5594344	C	0.458101	2864	-0.0122322	-0.0247757	0.621505	0.627986	0.327987	1
rs1414379	1	5697261	G	0.465222	2861	0.0223851	0.0247678	0.366103	0.375058	0.275845	0.998953
rs904534	1	5700044	A	0.464211	2864	0.0240999	0.0247582	0.330348	0.339395	0.275951	1
rs4433399	1	5733711	A	0.134951	2864	-0.0163439	-0.0357056	0.64714	0.65325	0.0303941	1
rs11260689	1	5737485	A	0.0226955	2864	0.0529695	0.0819942	0.518269	0.526057	0.0569681	1
rs1765719	1	5828516	C	0.317563	2864	-0.030321	-0.0265468	0.253384	0.262293	0.437733	1
rs12058375	1	5879496	A	0.0925279	2864	0.0424435	0.0429205	0.32272	0.331774	0.911262	1
rs3747987	1	5888706	A	0.198848	2864	-0.0351838	-0.0313667	0.261993	0.270943	0.558093	1
rs521736	1	5918139	A	0.0654679	2864	-0.0884697	-0.0506356	0.0806055	0.0863847	0.645358	1
rs2273042	1	6071709	A	0.106918	2862	-0.00178051	-0.0399214	0.964426	0.965085	0.282694	0.999302
rs12142108	1	6093575	A	0.315578	2863	-0.00347358	-0.0266002	0.896104	0.89802	0.436432	0.999651
rs11121299	1	6116605	A	0.192388	2864	0.0594353	0.0308851	0.0543042	0.0589298	0.018859	1
rs4908529	1	6145470	A	0.101082	2864	-0.0443678	-0.0403979	0.272087	0.281077	0.0180032	1
rs2247392	1	6180734	A	0.242144	2864	0.043953	0.0289726	0.129253	0.136508	0.760016	1
rs4908864	1	6185941	A	0.266061	2864	0.0361267	0.0281376	0.199166	0.207625	0.923756	1
chr1:6190118	1	6190118	A	0.0193785	2864	-0.179835	-0.0911856	0.0485877	0.0529142	0.626167	1
chr1:6194665	1	6194665	A	0.0317737	2864	-0.151639	-0.0705042	0.0314934	0.034781	0.532703	1
chr1:6194724	1	6194724	G	0.367668	2864	0.0148079	0.0252953	0.558277	0.565598	0.0270422	1
chr1:6195793	1	6195793	A	0.0226955	2864	0.0232023	0.0832799	0.780547	0.784516	0.657228	1
rs709209	1	6201001	G	0.340552	2863	0.00740127	0.0260135	0.776014	0.78006	0.279508	0.999651
rs846111	1	6201957	C	0.280901	2864	0.0221838	0.0277217	0.423578	0.432225	0.963111	1
chr1:6218825	1	6218825	C	0.444115	2863	-0.0240044	-0.0247601	0.332307	0.34135	0.225761	0.999651
chr1:6223091	1	6223091	C	0.293748	2863	0.0194525	0.0271537	0.473754	0.481993	0.471284	0.999651
chr1:6223509	1	6223509	A	0.00192039	2864	-0.110269	-0.284769	0.698592	0.703915	1	1
chr1:6223654	1	6223654	G	0.00698324	2864	0.0341839	0.14637	0.815339	0.818703	0.128134	1
chr1:6223869	1	6223869	A	0.240922	2864	0.0377112	0.0288632	0.191365	0.199729	0.385003	1
chr1:6223888	1	6223888	C	0.0262055	2862	0.137871	0.0784212	0.0787327	0.08444	0.722075	0.999302
chr1:6225970	1	6225970	A	0.0455656	2864	-0.0116694	-0.0592119	0.843766	0.846627	0.384231	1
chr1:6226211	1	6226211	A	0.0702061	2863	-0.0479573	-0.049132	0.329019	0.338067	0.472994	0.999651
chr1:6226353	1	6226353	A	0.0064595	2864	0.0431754	0.151811	0.776102	0.780146	0.11043	1
chr1:6227640	1	6227640	G	0.36683	2861	-4.06447e-05	-0.0257323	0.99874	0.998763	0.629227	0.998953
chr1:6229276	1	6229276	T	0.00680866	2864	0.0447577	0.148118	0.762518	0.766793	0.122116	1
chr1:6229499	1	6229499	G	0.0705554	2863	-0.0683108	-0.0487697	0.161309	0.169222	0.886333	0.999651
chr1:6229842	1	6229842	A	0.245286	2864	0.0228707	0.0289686	0.429819	0.438422	0.919655	1
chr1:6229976	1	6229976	G	0.239874	2864	0.0254732	0.0291182	0.381671	0.390562	0.918363	1
chr1:6231282	1	6231282	A	0.307021	2863	0.0435729	0.0271137	0.108045	0.11474	0.629088	0.999651
chr1:6235018	1	6235018	G	0.307275	2859	0.0201151	0.0272162	0.459856	0.46822	0.455193	0.998254
chr1:6235065	1	6235065	A	0.314006	2863	0.018455	0.0270129	0.494487	0.502526	0.487797	0.999651
chr1:6235573	1	6235573	A	0.0064595	2864	-0.0451391	-0.151807	0.766203	0.770416	0.11043	1
chr1:6235664	1	6235664	G	0.317388	2864	0.0162237	0.0269305	0.546889	0.554348	0.490193	1
chr1:6236106	1	6236106	A	0.317563	2864	0.0220556	0.026866	0.411676	0.420402	0.635456	1
chr1:6236525	1	6236525	G	0.320085	2818	0.022512	0.0271462	0.406943	0.415698	0.3637	0.983939
chr1:6236936	1	6236936	A	0.263443	2864	0.0272651	0.0280752	0.331477	0.340521	0.500189	1
chr1:6237066	1	6237066	G	0.326688	2859	0.0108948	0.0266782	0.682997	0.688564	0.701985	0.998254
chr1:6237409	1	6237409	A	0.317563	2864	0.0220556	0.026866	0.411676	0.420402	0.635456	1
chr1:6237712	1	6237712	A	0.0298534	2864	-0.0923245	-0.0720775	0.200226	0.208698	0.107831	1
chr1:6238804	1	6238804	A	0.316975	2863	0.0194506	0.0269281	0.4701	0.478373	0.545625	0.999651
chr1:6239601	1	6239601	A	0.323499	2864	0.0176396	0.0267546	0.509697	0.517578	0.579134	1
chr1:6239708	1	6239708	A	0.00663408	2864	-0.0535093	-0.142864	0.707997	0.71317	0.000206768	1
chr1:6239733	1	6239733	A	0.00140994	2837	0.341029	0.33348	0.30648	0.315536	1	0.990573
chr1:6240007	1	6240007	G	0.323201	2862	0.0171893	0.0267808	0.520969	0.528727	0.578604	0.999302
chr1:6240172	1	6240172	A	0.0300279	2864	-0.013426	-0.0732144	0.8545	0.857169	1	1
chr1:6240418	1	6240418	A	0.323427	2860	0.0175796	0.0267617	0.511248	0.519113	0.608436	0.998603
chr1:6240570	1	6240570	A	0.323673	2864	0.018006	0.026736	0.500645	0.508621	0.638715	1
chr1:6240656	1	6240656	G	0.321529	2852	0.0180153	0.0269431	0.503722	0.511666	0.414927	0.99581
rs4908874	1	6245523	A	0.344274	2864	0.0125962	0.026546	0.635139	0.641425	0.185355	1
rs1999835	1	6272462	A	0.110374	2863	-0.0231688	-0.040243	0.564803	0.572043	0.215855	0.999651
rs4243830	1	6500458	G	0.10723	2863	0.00361987	0.0404024	0.928609	0.929929	0.770096	0.999651
rs11811007	1	6507244	G	0.105447	2864	0.00723167	0.0405328	0.858397	0.860996	0.921346	1
rs12046884	1	6517148	A	0.105272	2864	0.00975441	0.0406291	0.810265	0.813718	1	1
rs12080675	1	6549202	C	0.15016	2807	0.00880643	0.035385	0.803458	0.80703	0.824316	0.980098
rs4908932	1	6562434	A	0.181516	2862	-0.00674888	-0.0329854	0.837883	0.840849	0.0322438	0.999302
rs6682920	1	6568454	A	0.322102	2864	0.0293919	0.0264724	0.266876	0.275847	0.493897	1
rs1556036	1	6574315	A	0.309008	2864	-0.00899854	-0.0270187	0.739097	0.743764	0.79292	1
rs7521134	1	6579827	A	0.321578	2864	0.0189581	0.0267446	0.478414	0.48661	0.732109	1
rs2072948	1	6602435	A	0.322975	2864	0.0155558	0.0267931	0.561517	0.568797	0.521789	1
rs12137794	1	6628531	A	0.0872905	2864	0.0612734	0.0443733	0.167322	0.175337	0.638146	1
rs2134318	1	6720689	G	0.489351	2864	-0.00574924	-0.0244282	0.813935	0.817323	0.0301034	1
rs17441830	1	6844165	G	0.118366	2864	0.0307943	0.0380453	0.418278	0.426961	0.152642	1
rs4518923	1	6959389	G	0.41236	2864	-0.0033002	-0.0249877	0.894927	0.896864	0.190011	1
rs6674104	1	6985320	A	0.0103003	2864	0.0234371	0.123992	0.850076	0.852824	1	1
rs11809898	1	7002349	A	0.118715	2864	0.045727	0.0383358	0.232948	0.241727	0.654844	1
rs1010806	1	7076560	A	0.403598	2863	-0.00289077	-0.025551	0.909922	0.911585	0.53457	0.999651
rs970973	1	7124777	A	0.441166	2864	0.0367334	0.0249666	0.141209	0.148733	0.676831	1
rs1894647	1	7128537	A	0.0708799	2864	0.00708842	0.0484399	0.883657	0.8858	0.777859	1
rs17350046	1	7135594	A	0.0027933	2864	-0.0584842	-0.236252	0.804483	0.808037	1	1
rs6680365	1	7159397	A	0.402409	2864	-0.0098235	-0.0251651	0.696269	0.701628	0.35109	1
rs1304712	1	7193125	G	0.401187	2864	0.000465209	0.0256864	0.98555	0.985818	0.293686	1
rs17030589	1	7201363	G	0.025166	2861	-0.118848	-0.0788183	0.131588	0.138898	0.425687	0.998953
rs6577435	1	7274915	A	0.257158	2864	0.0470827	0.0286934	0.10082	0.107297	0.433991	1
rs2301462	1	7315181	A	0.407472	2864	-0.0440945	-0.0250287	0.0781105	0.0837936	0.201753	1
rs4908457	1	7351773	G	0.0425978	2864	0.0444118	0.0606809	0.464235	0.47256	0.10127	1
rs845204	1	7387873	G	0.269728	2864	0.0040246	0.027634	0.884206	0.886339	0.0968577	1
rs7537181	1	7389892	G	0.379015	2864	0.00181735	0.0252067	0.942524	0.943588	0.0517798	1
rs12088178	1	7408904	G	0.383904	2864	-0.0488882	-0.0256167	0.0563326	0.0610595	0.968489	1
rs1193244	1	7437260	A	0.284043	2864	-0.0428341	-0.0275065	0.119415	0.126424	0.71335	1
rs17445205	1	7446367	A	0.0619763	2864	0.0472777	0.0510294	0.354197	0.363192	0.196863	1
rs1149332	1	7451433	A	0.261522	2864	0.00186086	0.0281324	0.947261	0.948238	0.438904	1
rs6682687	1	7501045	A	0.276633	2863	0.0240858	0.0277657	0.385686	0.394557	0.779454	0.999651
rs4908646	1	7504580	G	0.27514	2864	0.0255868	0.027797	0.357319	0.366305	0.778635	1
rs12723779	1	7514160	A	0.154504	2864	-0.00959894	-0.0342368	0.779194	0.783186	0.519535	1
rs6577449	1	7520681	A	0.0541201	2864	0.052897	0.0554748	0.34032	0.34935	0.468083	1
rs12407666	1	7523492	A	0.38757	2864	-0.0319383	-0.0255322	0.21097	0.219558	0.905994	1
rs12058235	1	7627731	T	0.0499302	2864	-0.0214602	-0.0574532	0.708758	0.713919	0.843485	1
rs17027053	1	7632895	G	0.147922	2863	-0.000440837	-0.0350371	0.989961	0.990147	0.824095	0.999651
rs12144591	1	7678066	A	0.0745461	2864	0.037091	0.0474016	0.433931	0.442503	1	1
rs2301488	1	7714998	A	0.493366	2864	0.00553256	0.0249214	0.824313	0.82752	0.940446	1
rs875994	1	7775506	G	0.178247	2864	0.0351583	0.0324064	0.277958	0.286967	0.701935	1
rs228641	1	7785486	A	0.0324721	2864	0.0201164	0.0694906	0.772211	0.776321	0.22458	1
rs228700	1	7811739	G	0.0324721	2864	0.0201164	0.0694906	0.772211	0.776321	0.22458	1
rs228654	1	7819815	A	0.0954958	2864	-0.0184058	-0.0422295	0.662945	0.668819	0.665126	1
rs500508	1	7850043	A	0.286662	2864	-0.0137135	-0.0272846	0.615238	0.621807	0.337294	1
rs227147	1	7877676	G	0.375961	2862	0.0282674	0.0254891	0.26743	0.276403	0.359728	0.999302
rs863171	1	7915202	A	0.459441	2860	-0.0158185	-0.0246921	0.521764	0.529513	0.228295	0.998603
rs2050198	1	8034426	C	0.221194	2864	0.00426425	0.0301573	0.887554	0.889626	0.625406	1
rs7545677	1	8088206	A	0.234462	2864	-0.0216683	-0.0294845	0.462397	0.470739	0.75486	1
rs7542367	1	8121850	G	0.148096	2863	-0.0470171	-0.0349402	0.178417	0.186605	0.711685	0.999651
rs17032305	1	8193077	G	0.0425978	2864	0.0940016	0.0611616	0.124308	0.131443	0.358724	1
rs10399665	1	8329874	G	0.415154	2864	-0.051885	-0.0252123	0.0395977	0.0434083	0.847524	1
rs10779702	1	8346097	A	0.356844	2864	0.0583696	0.0259827	0.024673	0.0274663	0.967549	1
rs10864360	1	8647109	G	0.35824	2864	-0.0544816	-0.0259381	0.0356897	0.0392558	0.967599	1
rs10864361	1	8649308	A	0.350209	2864	-0.0619586	-0.0260001	0.0171713	0.0193443	0.7738	1
rs2038903	1	8839104	A	0.442737	2864	-0.0166124	-0.025148	0.508879	0.516769	0.761953	1
rs1409147	1	8927907	A	0.31669	2864	0.0024982	0.0268584	0.925892	0.927263	0.729953	1
rs2274327	1	8931993	A	0.394204	2864	-0.0367587	-0.0253418	0.146913	0.154556	0.58405	1
rs6577546	1	8961609	G	0.261173	2864	0.0267563	0.0285042	0.347896	0.356909	0.561371	1
rs7513804	1	8967711	G	0.422634	2863	-0.0284713	-0.0251595	0.257788	0.266719	0.848172	0.999651
rs4908803	1	8982757	G	0.315514	2862	0.0140296	0.0267086	0.599386	0.606174	0.729212	0.999302
rs6685329	1	9016716	G	0.367842	2864	-0.0126312	-0.0258387	0.62495	0.631382	1	1
rs17033225	1	9053114	A	0.0424232	2864	-0.0479092	-0.0629152	0.446366	0.454842	0.0614962	1
rs12239636	1	9078288	A	0.0178073	2864	-0.0831562	-0.0922433	0.367329	0.37628	0.0595024	1
rs6577556	1	9141970	G	0.327514	2864	0.0137438	0.026658	0.606163	0.612858	0.610957	1
rs11802925	1	9151211	G	0.0702061	2863	0.0248511	0.048513	0.608472	0.615135	0.566108	0.999651
rs1009940	1	9200729	G	0.428422	2864	0.0499086	0.0246303	0.0427329	0.0467303	0.0268704	1
rs10489436	1	9208308	G	0.127968	2864	0.0423906	0.0377324	0.261245	0.270192	0.208962	1
rs2268175	1	9223195	G	0.392982	2864	0.029648	0.0254734	0.244472	0.25333	0.968758	1
rs2239560	1	9227318	A	0.164106	2864	0.0404056	0.033728	0.230923	0.239687	0.838059	1
rs732950	1	9232333	A	0.386522	2864	0.0294532	0.025524	0.248523	0.257405	0.874781	1
rs9434755	1	9259349	G	0.20949	2845	0.068897	0.0308749	0.0256489	0.0285165	0.610669	0.993366
rs11121371	1	9315315	G	0.162438	2838	0.00502682	0.0335994	0.881072	0.883261	0.214093	0.990922
rs9660890	1	9420700	G	0.2397	2864	-0.0226875	-0.0290658	0.435064	0.443628	0.719805	1
rs7533271	1	9485902	G	0.201362	2863	-0.0459553	-0.0307172	0.134634	0.142014	0.245461	0.999651
rs7412149	1	9502551	A	0.495461	2864	0.0142115	0.0251296	0.571715	0.578866	0.350078	1
rs12040542	1	9514086	G	0.140538	2864	-0.0202507	-0.0362813	0.576737	0.583824	0.215354	1
rs12037667	1	9517257	C	0.140238	2863	-0.0176157	-0.036356	0.628007	0.634396	0.163003	0.999651
rs6540991	1	9640674	G	0.325594	2864	0.0361548	0.0267299	0.176184	0.184338	0.551349	1
rs6666059	1	9645110	C	0.0832751	2864	0.0524332	0.0442349	0.235885	0.244685	0.0499518	1
rs1660742	1	9804552	G	0.0956704	2864	0.00496399	0.0423521	0.906696	0.908418	1	1
rs6699320	1	9810215	G	0.0878142	2864	-0.0117457	-0.0442014	0.790446	0.794244	0.726323	1
rs6683452	1	9952500	A	0.0913059	2864	0.0239213	0.0435801	0.583071	0.590076	0.431495	1
rs11121515	1	10048352	A	0.0675628	2864	0.0319701	0.0503326	0.525312	0.533022	0.179085	1
rs6685910	1	10118557	A	0.0900316	2849	-0.0240502	-0.0424673	0.571174	0.578333	0.00563101	0.994763
rs6670208	1	10175254	A	0.296613	2864	-0.0151544	-0.026833	0.572232	0.579377	0.088879	1
rs17396340	1	10208763	A	0.130063	2864	-0.00895185	-0.036315	0.805291	0.808831	0.046937	1
rs17034615	1	10234464	A	0.0513268	2864	0.0561606	0.0553458	0.310238	0.319296	0.050907	1
rs3753037	1	10278421	A	0.280552	2864	-0.0334678	-0.0271805	0.218204	0.226861	0.0372676	1
rs17401966	1	10308058	G	0.284567	2864	-0.0333577	-0.0270791	0.218002	0.226657	0.0434788	1
rs17034775	1	10321595	A	0.0520251	2864	0.0637072	0.055036	0.247046	0.255919	0.0556922	1
rs11121543	1	10326770	A	0.0251397	2864	-0.0596906	-0.077769	0.442762	0.451267	0.032291	1
rs12403443	1	10346575	G	0.306041	2864	-0.0191737	-0.0265873	0.470811	0.479078	0.0861476	1
rs11121552	1	10357911	A	0.284218	2864	-0.0321615	-0.0270768	0.234918	0.243712	0.0387449	1
rs17034849	1	10371183	A	0.0230447	2864	0.0822104	0.0832952	0.323654	0.332708	1	1
rs6674843	1	10380965	A	0.281948	2864	-0.0280375	-0.0271728	0.302154	0.311208	0.0524987	1
rs1889309	1	10402265	A	0.286313	2864	-0.0323969	-0.0270062	0.23029	0.239049	0.0353907	1
rs585870	1	10472215	C	0.284742	2864	-0.0165333	-0.0272926	0.544662	0.552147	0.251341	1
rs2506878	1	10488682	C	0.174057	2864	-0.024815	-0.0330412	0.452634	0.461059	0.55923	1
rs616488	1	10488802	G	0.323673	2864	-0.0100102	-0.0267606	0.708355	0.713522	0.578988	1
rs17412703	1	10489415	A	0.0708799	2864	0.0152236	0.0483186	0.752711	0.757151	0.669074	1
rs17035156	1	10508114	A	0.152235	2864	-0.0213829	-0.0345452	0.535927	0.543515	0.71723	1
rs12403130	1	10514818	C	0.122642	2862	0.0278152	0.0374917	0.458147	0.466525	0.164756	0.999302
rs12038548	1	10565784	A	0.123429	2864	0.0272041	0.0374322	0.467376	0.475673	0.195778	1
rs12045923	1	10566416	G	0.36051	2864	0.0327473	0.0255613	0.20015	0.20862	0.133697	1
rs190775	1	10606270	A	0.138443	2864	0.0148278	0.0356768	0.677691	0.683341	0.272412	1
rs17035482	1	10613535	A	0.0654679	2864	-0.00875393	-0.0499958	0.861006	0.863558	0.361564	1
rs11587145	1	10627275	A	0.131285	2864	0.0227664	0.0369387	0.537678	0.545246	0.870117	1
rs483296	1	10667710	A	0.435512	2861	-0.0391301	-0.0252966	0.121899	0.128972	0.470279	0.998953
rs7514663	1	10684936	A	0.015795	2849	-0.153586	-0.0998973	0.124186	0.131317	0.51038	0.994763
rs7514751	1	10685019	A	0.302305	2863	-0.046966	-0.0273858	0.0863497	0.0923415	0.287555	0.999651
rs284289	1	10686402	G	0.030737	2863	0.0301908	0.0720335	0.675127	0.680816	0.750072	0.999651
rs12567505	1	10687970	A	0.073175	2863	0.0441722	0.048212	0.359558	0.368537	0.410514	0.999651
rs4845952	1	10689966	A	0.133205	2864	0.0527581	0.0368213	0.151911	0.159651	0.686467	1
rs284254	1	10708901	G	0.091655	2864	0.0487554	0.0432647	0.259781	0.268722	0.91068	1
rs284277	1	10713384	C	0.392982	2864	0.0339126	0.0256574	0.186252	0.194549	0.480934	1
rs880315	1	10719453	G	0.36343	2863	0.0201015	0.0260992	0.441184	0.449701	0.374537	0.999651
rs11121621	1	10770647	A	0.140189	2864	0.00267485	0.0349384	0.938974	0.940104	0.00511139	1
rs1769669	1	10795969	A	0.185929	2864	-0.051772	-0.032286	0.108815	0.115532	0.35441	1
rs1292664	1	10827952	A	0.246334	2864	-0.0181353	-0.0290793	0.532858	0.540482	0.513251	1
rs12085982	1	10835734	G	0.21456	2864	0.0334472	0.0299836	0.26463	0.273591	0.222467	1
rs667444	1	10838094	G	0.384602	2864	-0.0166317	-0.0257972	0.519115	0.526894	0.407446	1
rs1280992	1	10844877	A	0.33345	2864	-0.00680735	-0.0261322	0.79448	0.798208	0.256467	1
rs1884429	1	11035423	A	0.225209	2864	-0.0016145	-0.0301825	0.95734	0.958131	0.198978	1
rs1194820	1	11051846	A	0.250698	2864	0.00724276	0.029024	0.80294	0.806521	0.296208	1
rs2791653	1	11052435	A	0.226781	2864	-0.00340996	-0.0300456	0.90964	0.911308	0.286832	1
rs910660	1	11053230	A	0.250349	2864	0.00691645	0.0290514	0.811822	0.815248	0.273351	1
rs1010447	1	11192383	A	0.254714	2864	0.00227263	0.0290275	0.937596	0.93875	0.104344	1
rs10779751	1	11206923	A	0.254803	2863	0.0036333	0.0290316	0.900405	0.902242	0.104306	0.999651
rs2295080	1	11245215	C	0.282844	2862	0.00515186	0.0281386	0.854728	0.857393	0.0722505	0.999302
rs11121717	1	11278036	G	0.0315992	2864	0.022002	0.0715229	0.75837	0.762715	1	1
rs2817644	1	11570256	A	0.0929745	2861	-0.0196497	-0.0430614	0.64816	0.654256	0.824268	0.998953
rs714829	1	11574497	G	0.111247	2863	-0.026759	-0.0399168	0.502622	0.510578	0.449911	0.999651
rs12760507	1	11618904	A	0.0343925	2864	0.00669258	0.0688426	0.922555	0.923987	0.774082	1
chr1:11717263	1	11717263	A	0.111906	2864	0.0361045	0.0390146	0.354753	0.363746	0.187399	1
chr1:11719611	1	11719611	A	0.416376	2864	-0.00867452	-0.0254132	0.732849	0.737618	0.538435	1
chr1:11719821	1	11719821	G	0.210196	2864	-0.00774394	-0.0299264	0.795816	0.79952	0.0242274	1
chr1:11721322	1	11721322	T	0.311736	2863	0.013258	0.0269745	0.623072	0.629531	0.727698	0.999651
chr1:11721815	1	11721815	A	0.325419	2864	-0.00851927	-0.0260503	0.743644	0.748235	0.0299279	1
chr1:11722635	1	11722635	A	0.152758	2864	-0.0276807	-0.0341935	0.418209	0.426893	0.193436	1
chr1:11723065	1	11723065	C	0.366969	2864	0.00658273	0.0259021	0.799389	0.803031	0.778438	1
rs4073395	1	11723290	A	0.315578	2863	0.00956953	0.0268922	0.721954	0.726902	0.761985	0.999651
chr1:11723610	1	11723610	G	0.165968	2862	0.00491696	0.0329474	0.881367	0.883551	0.0789905	0.999302
chr1:11723674	1	11723674	A	0.312609	2863	0.00507484	0.0269686	0.850739	0.853475	0.695654	0.999651
chr1:11724004	1	11724004	G	0.00209497	2864	0.137689	0.272703	0.613627	0.620219	1	1
chr1:11724229	1	11724229	A	0.357193	2864	0.00208308	0.0260687	0.936311	0.93749	0.744811	1
chr1:11725021	1	11725021	C	0.324659	2863	-0.00825491	-0.0261034	0.751821	0.756276	0.0407373	0.999651
chr1:11725538	1	11725538	C	0.315578	2863	0.00196997	0.0268849	0.941588	0.942669	0.761985	0.999651
chr1:11727177	1	11727177	C	0.0886872	2864	0.00368325	0.0432878	0.932192	0.933446	0.203134	1
chr1:11729438	1	11729438	C	0.153631	2864	-0.031716	-0.0341942	0.353655	0.362652	0.28142	1
chr1:11730013	1	11730013	G	0.323673	2864	-0.0147964	-0.0261003	0.570778	0.577942	0.0329184	1
chr1:11730557	1	11730557	G	0.167598	2864	0.006213	0.0326696	0.849171	0.851935	0.0318247	1
chr1:11731748	1	11731748	A	0.158803	2840	-0.00506474	-0.0342267	0.882361	0.884527	0.888265	0.99162
chr1:11732322	1	11732322	A	0.484981	2863	0.00481084	0.0249463	0.847078	0.84988	0.94036	0.999651
chr1:11732387	1	11732387	A	0.00157123	2864	0.367473	0.314573	0.24274	0.251587	1	1
chr1:11732432	1	11732432	G	0.31683	2858	0.00223235	0.0268909	0.93384	0.935064	0.762342	0.997905
chr1:11733092	1	11733092	A	0.148672	2862	-0.0207596	-0.0345543	0.547985	0.555431	0.160139	0.999302
chr1:11733560	1	11733560	A	0.355346	2862	0.00268787	0.0260948	0.91796	0.919476	0.806644	0.999302
rs4075033	1	11733821	G	0.329085	2864	0.00340489	0.0264817	0.897694	0.899581	0.932607	1
chr1:11733860	1	11733860	C	0.167249	2864	0.00316251	0.0326837	0.922916	0.924341	0.02663	1
chr1:11733870	1	11733870	G	0.317324	2863	0.0040633	0.0268489	0.879708	0.881922	0.730144	0.999651
chr1:11734371	1	11734371	A	0.156534	2862	-0.0171258	-0.0339276	0.613718	0.620308	0.257807	0.999302
chr1:11735282	1	11735282	A	0.0157123	2864	0.0470323	0.0987582	0.633906	0.64021	0.15385	1
chr1:11735428	1	11735428	A	0.00139665	2864	0.460076	0.333545	0.167786	0.175808	1	1
chr1:11736371	1	11736371	C	0.156948	2864	-0.0170726	-0.0339063	0.614596	0.621175	0.289645	1
chr1:11737218	1	11737218	G	0.317324	2863	0.00252772	0.0268481	0.924991	0.926378	0.730144	0.999651
chr1:11737951	1	11737951	A	0.152288	2863	-0.0264709	-0.034354	0.440985	0.449504	0.346426	0.999651
chr1:11741330	1	11741330	A	0.019224	2861	-0.0127221	-0.091648	0.889597	0.891631	0.625727	0.998953
chr1:11745182	1	11745182	A	0.147521	2864	0.00739198	0.0346547	0.83109	0.834176	0.15769	1
chr1:11745321	1	11745321	A	0.251053	2848	0.0426774	0.0285562	0.135044	0.142433	0.397066	0.994413
chr1:11745743	1	11745743	G	0.31669	2864	-0.0010606	-0.0266722	0.968281	0.968869	0.697568	1
chr1:11746720	1	11746720	A	0.340258	2864	0.0379564	0.0260268	0.144741	0.152339	0.298362	1
chr1:11746890	1	11746890	A	0.334967	2857	0.0326736	0.0264763	0.217177	0.225824	0.866602	0.997556
chr1:11746933	1	11746933	G	0.339909	2864	0.0317629	0.0263531	0.228094	0.236836	0.835096	1
chr1:11747143	1	11747143	A	0.337465	2864	0.0307598	0.0263225	0.242576	0.251422	0.933446	1
chr1:11747162	1	11747162	A	0.282745	2863	0.024078	0.0274913	0.381118	0.390011	0.460983	0.999651
chr1:11747165	1	11747165	G	0.338225	2862	0.0347941	0.0263418	0.186545	0.194846	1	0.999302
chr1:11747208	1	11747208	A	0.337465	2864	0.0325522	0.0263624	0.216906	0.22555	0.966666	1
chr1:11747722	1	11747722	A	0.00157123	2864	0.310609	0.314529	0.323379	0.332433	1	1
chr1:11748131	1	11748131	G	0.0900838	2864	0.0313611	0.0439862	0.475861	0.48408	0.255769	1
chr1:11748229	1	11748229	C	0.319134	2864	0.0167518	0.0268205	0.532241	0.539872	0.698988	1
chr1:11748438	1	11748438	C	0.319269	2844	0.0159074	0.0267669	0.552317	0.55971	0.965597	0.993017
chr1:11748672	1	11748672	A	0.0418994	2864	-0.021839	-0.0624147	0.726412	0.731287	0.816899	1
chr1:11750825	1	11750825	G	0.318198	2863	0.00923455	0.0268282	0.730688	0.735493	0.763078	0.999651
chr1:11750906	1	11750906	G	0.318261	2864	0.00877121	0.0268344	0.743771	0.74836	0.763074	1
chr1:11752756	1	11752756	G	0.109248	2833	0.0318304	0.0401402	0.427789	0.436406	0.923289	0.989176
chr1:11752767	1	11752767	T	0.134467	2852	0.0814217	0.0364789	0.0256135	0.0284784	0.809289	0.99581
chr1:11754182	1	11754182	A	0.0563897	2864	0.0595996	0.0541796	0.271316	0.280303	0.860518	1
chr1:11754202	1	11754202	G	0.289731	2863	0.0167664	0.0273237	0.539465	0.547012	0.554963	0.999651
chr1:11754462	1	11754462	G	0.105272	2864	0.0346054	0.0404675	0.392474	0.401311	0.766343	1
chr1:11754687	1	11754687	A	0.386667	2850	0.0268226	0.0255745	0.294269	0.303313	0.752192	0.995112
chr1:11754876	1	11754876	A	0.184358	2864	0.00190669	0.0319021	0.952341	0.953224	0.419065	1
chr1:11755210	1	11755210	C	0.0539216	2856	0.0507933	0.056883	0.371888	0.380821	0.000306962	0.997207
chr1:11755246	1	11755246	G	0.184707	2864	0.00395912	0.0318549	0.901089	0.902914	0.352691	1
chr1:11755953	1	11755953	A	0.386483	2863	0.030437	0.0255255	0.233099	0.241879	0.782799	0.999651
chr1:11756078	1	11756078	G	0.38673	2856	0.0298589	0.0255729	0.242969	0.251817	0.813026	0.997207
chr1:11756443	1	11756443	A	0.105272	2864	0.0346054	0.0404675	0.392474	0.401311	0.766343	1
chr1:11756497	1	11756497	A	0.386308	2863	0.0304429	0.0255414	0.233298	0.24208	0.84376	0.999651
chr1:11757041	1	11757041	G	0.386697	2864	0.0301763	0.0255195	0.237016	0.245825	0.782726	1
chr1:11757352	1	11757352	A	0.281447	2862	0.0204851	0.0276056	0.458049	0.466428	0.643933	0.999302
chr1:11758042	1	11758042	C	0.105272	2864	0.0391314	0.040467	0.333546	0.342588	0.766343	1
chr1:11758143	1	11758143	A	0.105134	2863	0.0389856	0.0404979	0.33572	0.344758	0.765752	0.999651
chr1:11758522	1	11758522	A	0.28125	2864	0.0202409	0.0275901	0.463174	0.471509	0.61132	1
chr1:11759037	1	11759037	G	0.184881	2864	0.00744642	0.0318525	0.815157	0.818524	0.385287	1
chr1:11759215	1	11759215	A	0.28125	2864	0.0202409	0.0275901	0.463174	0.471509	0.61132	1
chr1:11759257	1	11759257	A	0.105272	2864	0.0391314	0.040467	0.333546	0.342588	0.766343	1
chr1:11759269	1	11759269	G	0.386872	2864	0.0321079	0.0255414	0.20872	0.217285	0.874801	1
chr1:11759455	1	11759455	A	0.28125	2864	0.0202409	0.0275901	0.463174	0.471509	0.61132	1
chr1:11759635	1	11759635	C	0.281075	2864	0.0190418	0.0275885	0.490063	0.498146	0.610999	1
chr1:11760292	1	11760292	A	0.386618	2862	0.0336815	0.0255444	0.18732	0.195632	0.813069	0.999302
chr1:11760345	1	11760345	C	0.0644204	2864	0.052406	0.0513138	0.30712	0.316177	0.277899	1
chr1:11760598	1	11760598	A	0.281774	2864	0.0203179	0.027572	0.461183	0.469535	0.611591	1
chr1:11760686	1	11760686	A	0.281348	2863	0.0206766	0.0275944	0.453674	0.462091	0.61143	0.999651
chr1:11760965	1	11760965	G	0.105098	2864	0.037323	0.0405642	0.357522	0.366507	0.920867	1
chr1:11761038	1	11761038	A	0.105098	2864	0.037323	0.0405642	0.357522	0.366507	0.920867	1
chr1:11761103	1	11761103	A	0.105098	2864	0.037323	0.0405642	0.357522	0.366507	0.920867	1
chr1:11761143	1	11761143	C	0.064116	2862	0.0508152	0.05144	0.323225	0.332279	0.278053	0.999302
chr1:11761283	1	11761283	G	0.106039	2815	0.0364994	0.0406882	0.369691	0.378633	0.920825	0.982891
chr1:11761349	1	11761349	A	0.0639229	2855	0.0516282	0.0500356	0.302152	0.311206	0.0582911	0.996858
chr1:11761428	1	11761428	G	0.105098	2864	0.037323	0.0405642	0.357522	0.366507	0.920867	1
chr1:11761596	1	11761596	A	0.105098	2864	0.037323	0.0405642	0.357522	0.366507	0.920867	1
chr1:11761795	1	11761795	A	0.0640712	2864	0.0460218	0.0514294	0.370865	0.379803	0.346789	1
chr1:11761813	1	11761813	G	0.0632646	2861	0.0551698	0.0501832	0.271607	0.280596	0.0555204	0.998953
chr1:11762379	1	11762379	G	0.105098	2864	0.037323	0.0405642	0.357522	0.366507	0.920867	1
chr1:11762510	1	11762510	A	0.136936	2859	0.0372958	0.0363942	0.30547	0.314526	0.751562	0.998254
rs4846044	1	11762585	A	0.0328014	2820	0.0113036	0.0696775	0.871126	0.873496	0.226251	0.984637
chr1:11762967	1	11762967	A	0.386173	2864	0.0333234	0.0255579	0.192289	0.200665	0.874801	1
chr1:11763054	1	11763054	A	0.0638966	2864	0.0506904	0.0514831	0.324819	0.333872	0.34578	1
chr1:11763070	1	11763070	C	0.0659552	2858	0.0353771	0.049624	0.475906	0.484125	0.169871	0.997905
chr1:11763449	1	11763449	G	0.28125	2864	0.021852	0.0275914	0.428369	0.436982	0.61132	1
chr1:11763567	1	11763567	A	0.105272	2864	0.0369913	0.040542	0.361548	0.37052	0.92109	1
chr1:11764276	1	11764276	A	0.18525	2861	0.00813908	0.0318303	0.798181	0.801844	0.322281	0.998953
chr1:11764731	1	11764731	G	0.386522	2864	0.032348	0.0255486	0.205464	0.213994	0.874781	1
chr1:11765078	1	11765078	A	0.185056	2864	0.00782193	0.0318135	0.805784	0.809316	0.32182	1
chr1:11765811	1	11765811	A	0.0384078	2864	0.0038278	0.0651636	0.953158	0.954026	0.798371	1
chr1:11766219	1	11766219	C	0.289032	2863	0.0185113	0.0272881	0.49754	0.505548	0.439417	0.999651
chr1:11766270	1	11766270	A	0.105098	2864	0.0360887	0.0406394	0.374529	0.383451	1	1
chr1:11766427	1	11766427	A	0.0638966	2864	0.0500617	0.0514829	0.330854	0.3399	0.34578	1
chr1:11766801	1	11766801	A	0.19391	2857	0.00204727	0.031292	0.947836	0.948802	0.369289	0.997556
chr1:11767324	1	11767324	G	0.105098	2864	0.0360887	0.0406394	0.374529	0.383451	1	1
chr1:11768111	1	11768111	A	0.10496	2863	0.0381106	0.0406556	0.348553	0.357564	1	0.999651
chr1:11770023	1	11770023	G	0.0642458	2864	0.0524203	0.0513744	0.307559	0.316615	0.277903	1
chr1:11770346	1	11770346	G	0.392633	2864	0.0262102	0.0252207	0.298695	0.307746	0.224699	1
chr1:11770448	1	11770448	A	0.104923	2864	0.0350464	0.0406616	0.388741	0.397597	1	1
chr1:11770489	1	11770489	A	0.105098	2864	0.0349018	0.0406398	0.390447	0.399295	1	1
rs1537514	1	11770655	C	0.105098	2864	0.0360887	0.0406394	0.374529	0.383451	1	1
chr1:11770726	1	11770726	A	0.193959	2864	0.014346	0.0312437	0.646116	0.652242	0.338761	1
chr1:11770730	1	11770730	A	0.00453911	2864	0.0671573	0.185674	0.71758	0.722598	1	1
chr1:11772952	1	11772952	A	0.335894	2864	0.00924549	0.0263431	0.725615	0.730503	0.867039	1
chr1:11773514	1	11773514	A	0.0410265	2864	0.00410926	0.0627232	0.947765	0.948732	0.812645	1
chr1:11773590	1	11773590	C	0.297694	2862	0.019299	0.0270928	0.476261	0.484477	0.502814	0.999302
chr1:11773772	1	11773772	A	0.0457402	2864	0.0501634	0.0603512	0.405866	0.414627	0.28133	1
chr1:11774697	1	11774697	A	0.105098	2864	0.0360887	0.0406394	0.374529	0.383451	1	1
chr1:11774887	1	11774887	A	0.289106	2864	0.0204891	0.0272839	0.452677	0.461102	0.439647	1
chr1:11775485	1	11775485	C	0.0251397	2864	-0.0271446	-0.0800233	0.734452	0.739196	1	1
rs1801131	1	11777063	C	0.330831	2864	0.0240415	0.0265533	0.36525	0.374209	0.800113	1
chr1:11777258	1	11777258	A	0.266061	2864	0.0327511	0.0281336	0.244373	0.25323	0.848207	1
chr1:11777342	1	11777342	G	0.403108	2864	0.01885	0.0253482	0.457093	0.465481	0.846077	1
chr1:11778454	1	11778454	G	0.396823	2864	0.0248773	0.0253697	0.326793	0.335843	0.696373	1
chr1:11778484	1	11778484	C	0.0600559	2864	0.0560011	0.0529923	0.290613	0.299651	0.322683	1
chr1:11778965	1	11778965	A	0.291303	2863	-0.00701598	-0.0273381	0.797459	0.801135	0.717312	0.999651
rs17421462	1	11779434	A	0.0598813	2864	0.0575917	0.0530573	0.277717	0.286725	0.403349	1
rs1572151	1	11780298	G	0.0642458	2864	0.0494537	0.0510838	0.333	0.342042	0.754785	1
chr1:11780375	1	11780375	A	0.185056	2864	0.00358878	0.0318143	0.910186	0.911844	0.32182	1
chr1:11780538	1	11780538	A	0.403282	2864	0.0240632	0.0252604	0.340789	0.349818	0.586755	1
chr1:11780911	1	11780911	A	0.104574	2864	0.0361786	0.0407063	0.374126	0.38305	1	1
chr1:11781137	1	11781137	A	0.183549	2863	-0.00012764	-0.0320056	0.996818	0.996877	0.492723	0.999651
chr1:11781171	1	11781171	G	0.0466457	2862	-0.0189932	-0.0587017	0.746275	0.750823	0.40077	0.999302
chr1:11781977	1	11781977	G	0.0464385	2864	-0.01318	-0.058781	0.822585	0.825822	0.397368	1
chr1:11782193	1	11782193	C	0.0464385	2864	-0.01318	-0.058781	0.822585	0.825822	0.397368	1
chr1:11782223	1	11782223	A	0.0464385	2864	-0.01318	-0.058781	0.822585	0.825822	0.397368	1
chr1:11782704	1	11782704	G	0.104923	2864	0.0339396	0.0406633	0.403915	0.412688	1	1
chr1:11782707	1	11782707	A	0.24773	2864	0.00518635	0.0286567	0.856381	0.859016	0.482676	1
chr1:11783045	1	11783045	A	0.183834	2864	-0.00848862	-0.0319149	0.790257	0.794058	0.383101	1
rs13306567	1	11783052	C	0.0464385	2864	-0.01318	-0.058781	0.822585	0.825822	0.397368	1
chr1:11783270	1	11783270	A	0.247905	2864	0.00582128	0.0286295	0.838876	0.841824	0.422823	1
chr1:11783430	1	11783430	A	0.151415	2863	0.0225154	0.0349634	0.519595	0.527369	0.560503	0.999651
rs17037397	1	11784750	A	0.040852	2864	0.00639744	0.0628388	0.91891	0.920408	0.811259	1
chr1:11784801	1	11784801	G	0.281599	2864	-0.0282835	-0.027899	0.310686	0.319744	0.432318	1
rs17367504	1	11785365	G	0.148568	2864	0.0134787	0.0351251	0.701175	0.706457	0.824549	1
chr1:11785644	1	11785644	A	0.101781	2864	0.0259812	0.0411476	0.52777	0.535452	0.918624	1
chr1:11787823	1	11787823	A	0.102587	2861	0.0208473	0.0408258	0.609603	0.616251	0.542293	0.998953
chr1:11788129	1	11788129	C	0.102725	2862	0.0208556	0.0408039	0.609268	0.615921	0.543356	0.999302
chr1:11788391	1	11788391	G	0.149267	2864	0.0130278	0.0349407	0.709256	0.714408	1	1
chr1:11788770	1	11788770	A	0.0456134	2861	-0.00762923	-0.0592602	0.897562	0.899452	0.384524	0.998953
chr1:11789038	1	11789038	A	0.040852	2864	0.00639744	0.0628388	0.91891	0.920408	0.811259	1
chr1:11789631	1	11789631	A	0.260999	2864	0.0113417	0.0281871	0.68741	0.692909	0.497924	1
chr1:11789767	1	11789767	C	0.00209497	2864	-0.0144303	-0.272606	0.957784	0.958566	1	1
chr1:11790239	1	11790239	C	0.0314246	2864	0.0392527	0.0709309	0.579994	0.587039	0.364259	1
chr1:11790465	1	11790465	A	0.0314246	2864	0.0392527	0.0709309	0.579994	0.587039	0.364259	1
chr1:11791098	1	11791098	G	0.102828	2864	0.0217449	0.0407787	0.593866	0.600728	0.544419	1
chr1:11791817	1	11791817	G	0.395564	2863	0.0238125	0.0254454	0.349362	0.358371	0.875804	0.999651
chr1:11792102	1	11792102	C	0.260999	2864	0.0113417	0.0281871	0.68741	0.692909	0.497924	1
chr1:11792165	1	11792165	A	0.260687	2854	0.0143121	0.0282061	0.611866	0.618482	0.496645	0.996508
chr1:11792440	1	11792440	G	0.102828	2864	0.0217449	0.0407787	0.593866	0.600728	0.544419	1
chr1:11792720	1	11792720	G	0.102828	2864	0.0217449	0.0407787	0.593866	0.600728	0.544419	1
chr1:11792828	1	11792828	G	0.0682612	2864	0.0122268	0.0498438	0.806222	0.809746	0.379991	1
chr1:11792866	1	11792866	G	0.0518506	2864	-0.0888792	-0.0566715	0.116806	0.123746	0.443556	1
rs17037425	1	11792970	A	0.134313	2859	0.029176	0.0364876	0.423934	0.432579	0.809346	0.998254
chr1:11793318	1	11793318	A	0.10388	2835	0.0236971	0.0408803	0.562138	0.56941	0.613844	0.989874
chr1:11793700	1	11793700	A	0.103039	2863	0.0209955	0.0407555	0.606444	0.613135	0.612576	0.999651
chr1:11793853	1	11793853	A	0.102689	2863	0.0219265	0.0408094	0.591067	0.597967	0.543236	0.999651
chr1:11794362	1	11794362	G	0.102864	2863	0.0212204	0.0407727	0.602745	0.609487	0.544554	0.999651
chr1:11794907	1	11794907	G	0.103003	2864	0.022807	0.040756	0.575753	0.582854	0.61252	1
chr1:11794982	1	11794982	G	0.102828	2864	0.0217449	0.0407787	0.593866	0.600728	0.544419	1
chr1:11795243	1	11795243	A	0.101926	2855	0.0201356	0.040946	0.622889	0.62935	0.474494	0.996858
chr1:11795407	1	11795407	A	0.0460894	2864	-0.00933032	-0.05896	0.874261	0.876574	0.391623	1
chr1:11795607	1	11795607	G	0.102864	2863	0.0219907	0.0407845	0.589754	0.596671	0.544554	0.999651
chr1:11795642	1	11795642	A	0.102828	2864	0.0217449	0.0407787	0.593866	0.600728	0.544419	1
chr1:11796374	1	11796374	G	0.149092	2864	0.0134919	0.0349496	0.699469	0.704777	0.941336	1
chr1:11796438	1	11796438	G	0.412709	2864	0.0158089	0.0251557	0.529712	0.537372	0.537414	1
chr1:11796456	1	11796456	C	0.40933	2851	0.0212151	0.0253122	0.401954	0.410739	0.756666	0.995461
chr1:11796741	1	11796741	C	0.102828	2864	0.0217449	0.0407787	0.593866	0.600728	0.544419	1
chr1:11796776	1	11796776	A	0.102828	2864	0.0217449	0.0407787	0.593866	0.600728	0.544419	1
chr1:11799004	1	11799004	G	0.410409	2863	0.0172444	0.0252598	0.494808	0.502844	0.7869	0.999651
chr1:11799249	1	11799249	A	0.0619763	2864	0.0289748	0.0502905	0.564515	0.571758	0.00883901	1
chr1:11799649	1	11799649	A	0.0460894	2864	-0.00933032	-0.05896	0.874261	0.876574	0.391623	1
chr1:11799718	1	11799718	T	0.0460894	2864	-0.00933032	-0.05896	0.874261	0.876574	0.391623	1
chr1:11800233	1	11800233	A	0.0460894	2864	-0.00933032	-0.05896	0.874261	0.876574	0.391623	1
chr1:11800566	1	11800566	C	0.0460894	2864	-0.00933032	-0.05896	0.874261	0.876574	0.391623	1
chr1:11800813	1	11800813	A	0.0457722	2862	-0.00557262	-0.0591625	0.924957	0.926344	0.38674	0.999302
chr1:11801206	1	11801206	G	0.102828	2864	0.0217449	0.0407787	0.593866	0.600728	0.544419	1
chr1:11801653	1	11801653	C	0.0460894	2864	-0.00933032	-0.05896	0.874261	0.876574	0.391623	1
chr1:11801690	1	11801690	G	0.0461055	2863	-0.00962717	-0.0589577	0.870291	0.872675	0.391745	0.999651
chr1:11801947	1	11801947	A	0.102828	2864	0.0217449	0.0407787	0.593866	0.600728	0.544419	1
chr1:11802055	1	11802055	A	0.0460894	2864	-0.00933032	-0.05896	0.874261	0.876574	0.391623	1
chr1:11802272	1	11802272	A	0.403282	2864	0.0189991	0.0252964	0.452617	0.461042	0.697835	1
chr1:11803907	1	11803907	G	0.259888	2857	0.0135419	0.0282129	0.631235	0.637578	0.43657	0.997556
chr1:11804314	1	11804314	A	0.040852	2864	0.00639744	0.0628388	0.91891	0.920408	0.811259	1
chr1:11804534	1	11804534	C	0.147863	2854	0.00868694	0.0350599	0.804309	0.807866	0.823563	0.996508
chr1:11805219	1	11805219	C	0.103003	2864	0.0221418	0.0407561	0.586941	0.593895	0.61252	1
chr1:11806310	1	11806310	G	0.00244413	2864	-0.0951355	-0.252444	0.706279	0.711479	1	1
rs12567136	1	11806318	A	0.148795	2863	0.0133524	0.0349737	0.702622	0.70788	0.941153	0.999651
chr1:11806734	1	11806734	G	0.0408662	2863	0.00659007	0.0628478	0.916489	0.918032	0.811313	0.999651
chr1:11807206	1	11807206	A	0.046264	2864	-8.08184e-05	-0.0588644	0.998905	0.998925	0.394416	1
chr1:11807467	1	11807467	G	0.00226955	2864	-0.0655949	-0.261937	0.802261	0.805854	1	1
chr1:11808234	1	11808234	G	0.148568	2864	0.0148892	0.034978	0.670346	0.676108	0.882702	1
chr1:11809286	1	11809286	A	0.046264	2864	-8.08184e-05	-0.0588644	0.998905	0.998925	0.394416	1
chr1:11809391	1	11809391	A	0.0619763	2864	0.0289748	0.0502905	0.564515	0.571758	0.00883901	1
chr1:11809400	1	11809400	A	0.102828	2864	0.0217449	0.0407787	0.593866	0.600728	0.544419	1
rs7537765	1	11809890	G	0.149267	2864	0.0167322	0.0349389	0.632011	0.638342	1	1
chr1:11809903	1	11809903	A	0.102828	2864	0.0217449	0.0407787	0.593866	0.600728	0.544419	1
chr1:11809969	1	11809969	G	0.149267	2864	0.0167322	0.0349389	0.632011	0.638342	1	1
chr1:11810648	1	11810648	A	0.040852	2864	0.00639744	0.0628388	0.91891	0.920408	0.811259	1
chr1:11810660	1	11810660	A	0.0336941	2864	0.0455645	0.0687982	0.507784	0.515685	0.564024	1
chr1:11811510	1	11811510	G	0.046264	2864	-8.08184e-05	-0.0588644	0.998905	0.998925	0.394416	1
chr1:11811800	1	11811800	C	0.046264	2864	-8.08184e-05	-0.0588644	0.998905	0.998925	0.394416	1
chr1:11811812	1	11811812	A	0.040852	2864	0.00639744	0.0628388	0.91891	0.920408	0.811259	1
chr1:11812055	1	11812055	G	0.410409	2863	0.019468	0.0252758	0.441168	0.449686	0.846882	0.999651
chr1:11812155	1	11812155	G	0.046264	2864	-8.08184e-05	-0.0588644	0.998905	0.998925	0.394416	1
chr1:11812443	1	11812443	G	0.0464385	2864	0.000884523	0.0587719	0.987992	0.988215	0.397368	1
chr1:11812692	1	11812692	A	0.046264	2864	-8.08184e-05	-0.0588644	0.998905	0.998925	0.394416	1
chr1:11812791	1	11812791	G	0.102828	2864	0.0217449	0.0407787	0.593866	0.600728	0.544419	1
chr1:11812977	1	11812977	A	0.0464385	2864	0.00292453	0.0587719	0.960313	0.961048	0.397368	1
chr1:11813261	1	11813261	C	0.19263	2863	-0.0070077	-0.0313945	0.823369	0.826591	0.508493	0.999651
chr1:11814144	1	11814144	A	0.046264	2864	-8.08184e-05	-0.0588644	0.998905	0.998925	0.394416	1
chr1:11814213	1	11814213	G	0.0240922	2864	0.0648536	0.0805001	0.420454	0.429122	0.227446	1
chr1:11814542	1	11814542	A	0.046264	2864	-8.08184e-05	-0.0588644	0.998905	0.998925	0.394416	1
chr1:11814589	1	11814589	G	0.0462801	2863	0.000115551	0.0588719	0.998434	0.998463	0.394545	0.999651
chr1:11814681	1	11814681	G	0.040852	2864	0.00639744	0.0628388	0.91891	0.920408	0.811259	1
chr1:11815202	1	11815202	C	0.14897	2863	0.0157359	0.0350153	0.653142	0.659164	1	0.999651
chr1:11815237	1	11815237	A	0.103003	2864	0.0211595	0.0407567	0.603644	0.610374	0.61252	1
chr1:11815366	1	11815366	G	0.046264	2864	-8.08184e-05	-0.0588644	0.998905	0.998925	0.394416	1
chr1:11815876	1	11815876	G	0.102828	2864	0.0217449	0.0407787	0.593866	0.600728	0.544419	1
chr1:11818254	1	11818254	G	0.0465849	2855	-0.00463177	-0.0588125	0.937228	0.938389	0.398621	0.996858
chr1:11818382	1	11818382	A	0.149092	2864	0.0159429	0.0349487	0.648261	0.654356	0.941336	1
chr1:11818553	1	11818553	C	0.046264	2864	-8.08184e-05	-0.0588644	0.998905	0.998925	0.394416	1
chr1:11818932	1	11818932	G	0.113827	2864	0.0340858	0.0395385	0.388638	0.397495	0.516422	1
chr1:11819189	1	11819189	G	0.102864	2863	0.0219105	0.0407858	0.591123	0.598021	0.544554	0.999651
chr1:11819241	1	11819241	A	0.0677374	2864	0.0557284	0.0501572	0.266536	0.275505	0.297829	1
chr1:11819414	1	11819414	A	0.0675864	2863	0.0549703	0.0502193	0.27369	0.282686	0.297174	0.999651
chr1:11819443	1	11819443	A	0.0619763	2864	0.0289748	0.0502905	0.564515	0.571758	0.00883901	1
chr1:11819669	1	11819669	A	0.040852	2864	0.00639744	0.0628388	0.91891	0.920408	0.811259	1
chr1:11819873	1	11819873	A	0.102828	2864	0.0217449	0.0407787	0.593866	0.600728	0.544419	1
chr1:11820179	1	11820179	G	0.401711	2864	0.0209172	0.0253546	0.409381	0.418121	0.845877	1
chr1:11820345	1	11820345	A	0.040852	2864	0.00639744	0.0628388	0.91891	0.920408	0.811259	1
chr1:11820548	1	11820548	A	0.0677374	2864	0.0557284	0.0501572	0.266536	0.275505	0.297829	1
chr1:11820579	1	11820579	A	0.046264	2864	-8.08184e-05	-0.0588644	0.998905	0.998925	0.394416	1
chr1:11820717	1	11820717	T	0.401711	2864	0.0209172	0.0253546	0.409381	0.418121	0.845877	1
chr1:11821376	1	11821376	A	0.0406774	2864	0.00515708	0.0629565	0.934714	0.935922	0.809929	1
chr1:11821436	1	11821436	C	0.114176	2864	0.0354164	0.0394306	0.369081	0.378025	0.580381	1
chr1:11821446	1	11821446	A	0.0616271	2864	0.0359346	0.0505416	0.47709	0.485298	0.0140475	1
chr1:11821620	1	11821620	A	0.287186	2864	0.00787887	0.0273602	0.773371	0.777462	0.493536	1
chr1:11822223	1	11822223	A	0.114176	2864	0.0354164	0.0394306	0.369081	0.378025	0.580381	1
chr1:11822622	1	11822622	G	0.000872905	2864	0.497461	0.4218	0.238248	0.247065	1	1
chr1:11822729	1	11822729	A	0.046264	2864	-8.08184e-05	-0.0588644	0.998905	0.998925	0.394416	1
chr1:11822972	1	11822972	A	0.114176	2864	0.0354164	0.0394306	0.369081	0.378025	0.580381	1
chr1:11823024	1	11823024	G	0.0677374	2864	0.0557284	0.0501572	0.266536	0.275505	0.297829	1
chr1:11823389	1	11823389	G	0.114176	2864	0.0354164	0.0394306	0.369081	0.378025	0.580381	1
chr1:11823412	1	11823412	A	0.114351	2864	0.0355696	0.0393443	0.365963	0.374919	0.712456	1
chr1:11824179	1	11824179	G	0.114351	2864	0.0345786	0.0394103	0.380269	0.389166	0.580256	1
chr1:11824736	1	11824736	G	0.0466131	2864	0.00691538	0.0586775	0.906183	0.907915	0.400478	1
chr1:11825256	1	11825256	A	0.0194124	2859	-0.0753794	-0.0912269	0.408642	0.417387	0.626212	0.998254
rs14078	1	11825597	A	0.108911	2828	0.0431341	0.0402552	0.283937	0.292962	0.922764	0.98743
chr1:11826472	1	11826472	A	0.114176	2864	0.0354164	0.0394306	0.369081	0.378025	0.580381	1
chr1:11826636	1	11826636	G	0.0466131	2864	0.00691538	0.0586775	0.906183	0.907915	0.400478	1
rs198358	1	11826663	G	0.217179	2864	0.0327011	0.0304163	0.282323	0.291343	0.54545	1
chr1:11826679	1	11826679	A	0.0410265	2864	0.00784647	0.062722	0.900445	0.902282	0.812645	1
chr1:11826773	1	11826773	G	0.0466131	2864	0.00691538	0.0586775	0.906183	0.907915	0.400478	1
chr1:11827578	1	11827578	A	0.0148394	2864	-0.0842838	-0.103776	0.416694	0.425388	1	1
chr1:11827594	1	11827594	A	0.41233	2863	0.019047	0.0251949	0.449656	0.458106	0.643522	0.999651
chr1:11827646	1	11827646	G	0.0389316	2864	0.00531009	0.0647717	0.934661	0.93587	0.800024	1
chr1:11828438	1	11828438	G	0.0616486	2863	0.0293309	0.0505552	0.561797	0.569074	0.0140721	0.999651
chr1:11828582	1	11828582	A	0.0546439	2864	-0.0148708	-0.0545508	0.785156	0.789045	0.58506	1
rs5065	1	11828655	G	0.123123	2863	0.0266917	0.03811	0.483688	0.491833	0.729614	0.999651
chr1:11829568	1	11829568	G	0.0682612	2864	0.0560507	0.0500014	0.262295	0.271247	0.240063	1
rs5064	1	11830190	A	0.0682612	2864	0.0560507	0.0500014	0.262295	0.271247	0.240063	1
chr1:11830235	1	11830235	A	0.042074	2864	-0.00669792	-0.0620389	0.914025	0.915613	1	1
chr1:11830733	1	11830733	C	0.0101257	2864	-0.0643003	-0.125006	0.606989	0.613673	1	1
chr1:11830754	1	11830754	A	0.0497904	2862	-0.0712561	-0.0586343	0.224266	0.232976	0.00911827	0.999302
chr1:11832101	1	11832101	A	0.118757	2863	0.0552267	0.0387313	0.153899	0.161677	0.592806	0.999651
chr1:11832122	1	11832122	G	0.119455	2863	0.0469896	0.0384863	0.222107	0.230799	0.929398	0.999651
chr1:11832323	1	11832323	A	0.0340433	2864	-0.0206019	-0.0695156	0.766952	0.771152	0.259036	1
chr1:11833264	1	11833264	G	0.404471	2863	0.0323233	0.0252159	0.199892	0.208359	0.509612	0.999651
chr1:11833803	1	11833803	C	0.118582	2863	0.0548989	0.0387515	0.156574	0.164402	0.654488	0.999651
chr1:11840051	1	11840051	A	0.0138015	2862	-0.00617226	-0.107524	0.954224	0.955072	1	0.999302
chr1:11843039	1	11843039	A	0.0133146	2854	0.0715939	0.10934	0.512609	0.520459	1	0.996508
chr1:11843768	1	11843768	C	0.344165	2862	0.00213738	0.02609	0.934708	0.935916	0.562242	0.999302
chr1:11843830	1	11843830	G	0.280726	2864	-0.0105378	-0.0277762	0.704404	0.709635	0.8897	1
chr1:11844580	1	11844580	A	0.280901	2864	-0.01103	-0.0277773	0.691303	0.696741	0.889649	1
chr1:11844735	1	11844735	G	0.241096	2864	0.00189839	0.0291045	0.947993	0.948957	0.878269	1
rs6668659	1	11844885	C	0.344394	2863	0.0029793	0.0260964	0.909107	0.910785	0.590744	0.999651
chr1:11844993	1	11844993	A	0.00541201	2864	0.0124318	0.170159	0.941758	0.942836	1	1
chr1:11845732	1	11845732	A	0.0146648	2864	0.014927	0.104369	0.886273	0.888368	1	1
chr1:11846614	1	11846614	A	0.0314246	2864	-0.0156809	-0.0705524	0.824112	0.827322	0.203091	1
chr1:11846617	1	11846617	G	0.0331704	2864	-0.0281193	-0.0703454	0.689354	0.694823	0.372821	1
chr1:11847831	1	11847831	G	0.0418994	2864	-0.0487732	-0.0629676	0.43859	0.447127	0.238584	1
rs6676300	1	11847887	G	0.359091	2860	0.0052234	0.025888	0.840097	0.843023	0.684558	0.998603
chr1:11848319	1	11848319	A	0.0471369	2864	-0.0305213	-0.0588267	0.603876	0.610603	1	1
chr1:11848368	1	11848368	G	0.103388	2863	0.00264347	0.0406564	0.948158	0.949118	0.480335	0.999651
chr1:11848937	1	11848937	A	0.0597826	2852	0.0471658	0.0523569	0.367666	0.376616	0.504913	0.99581
chr1:11849308	1	11849308	T	0.0146648	2864	0.014927	0.104369	0.886273	0.888368	1	1
chr1:11849345	1	11849345	A	0.0331704	2864	-0.0281193	-0.0703454	0.689354	0.694823	0.372821	1
chr1:11849485	1	11849485	A	0.033345	2864	-0.035621	-0.0701746	0.61173	0.618348	0.374326	1
chr1:11849520	1	11849520	A	0.00209497	2864	0.193116	0.272986	0.479305	0.487492	1	1
chr1:11849643	1	11849643	G	0.096577	2863	0.0218306	0.04197	0.602959	0.609698	0.592646	0.999651
chr1:11850412	1	11850412	A	0.0944813	2863	0.0175181	0.0422888	0.678691	0.684325	0.444082	0.999651
chr1:11850455	1	11850455	G	0.0125698	2864	-0.0103861	-0.112504	0.926445	0.927806	1	1
chr1:11850465	1	11850465	G	0.0331704	2864	-0.0281193	-0.0703454	0.689354	0.694823	0.372821	1
rs12753716	1	11851228	G	0.0612993	2863	0.0412292	0.0517367	0.425506	0.43414	0.626539	0.999651
chr1:11851301	1	11851301	C	0.358191	2863	-0.0186593	-0.0256394	0.466761	0.475064	0.15481	0.999651
chr1:11851406	1	11851406	G	0.0822564	2863	0.00811871	0.0450877	0.857102	0.859724	0.534671	0.999651
chr1:11851417	1	11851417	G	0.241271	2864	-0.0258162	-0.0291079	0.375126	0.384045	0.95934	1
chr1:11851482	1	11851482	A	0.0542947	2864	-0.0456227	-0.0554055	0.410262	0.418997	0.468019	1
chr1:11852740	1	11852740	C	0.0932588	2863	0.0146069	0.042478	0.730944	0.735745	0.375532	0.999651
chr1:11853450	1	11853450	T	0.0928495	2811	0.00075517	0.0431323	0.986031	0.98629	0.65469	0.981494
chr1:11854032	1	11854032	A	0.0321229	2864	-0.0259946	-0.0713908	0.715771	0.720819	0.367477	1
chr1:11854675	1	11854675	G	0.263268	2864	-0.0323176	-0.02814	0.25078	0.259675	0.596303	1
chr1:11855265	1	11855265	A	0.357891	2864	-0.0179162	-0.0255524	0.483207	0.491357	0.0736189	1
chr1:11855291	1	11855291	G	0.237605	2864	-0.0231359	-0.0292873	0.42955	0.438154	1	1
chr1:11855434	1	11855434	A	0.035627	2863	-0.0381127	-0.0680956	0.575688	0.582789	0.266115	0.999651
rs198384	1	11856965	G	0.433811	2863	-0.00823102	-0.0252133	0.744079	0.748663	0.732115	0.999651
rs7545290	1	11857515	G	0.0450419	2864	-0.0620832	-0.0612304	0.310618	0.319675	0.0287586	1
chr1:11857753	1	11857753	A	0.0431215	2864	-0.0808969	-0.0624249	0.195007	0.203417	0.0637113	1
chr1:11858030	1	11858030	A	0.0431215	2864	-0.0808969	-0.0624249	0.195007	0.203417	0.0637113	1
chr1:11858911	1	11858911	C	0.447975	2864	0.00949773	0.0249071	0.702961	0.708215	0.596844	1
chr1:11859076	1	11859076	G	0.449372	2864	0.0120052	0.02491	0.629845	0.636207	0.623543	1
rs11804222	1	11859101	A	0.113827	2864	-0.00903879	-0.0391507	0.817415	0.820742	0.853022	1
chr1:11859950	1	11859950	A	0.447451	2864	0.00941078	0.0249212	0.705712	0.710921	0.623298	1
chr1:11859991	1	11859991	A	0.436802	2864	-0.00848027	-0.0251102	0.735573	0.740298	1	1
chr1:11860927	1	11860927	A	0.475367	2862	-0.0245279	-0.0249912	0.326365	0.335416	0.793141	0.999302
chr1:11860986	1	11860986	A	0.0551676	2864	0.011318	0.0545258	0.835564	0.838571	0.8575	1
chr1:11861343	1	11861343	A	0.460021	2864	-0.0172119	-0.025139	0.493551	0.501599	0.522531	1
chr1:11861459	1	11861459	A	0.0553615	2863	-0.0298651	-0.0546081	0.584447	0.591434	1	0.999651
rs12741980	1	11862180	C	0.0581761	2862	0.0397963	0.05334	0.455615	0.464015	1	0.999302
chr1:11862853	1	11862853	A	0.370635	2864	0.0164941	0.0255785	0.519028	0.526808	0.400362	1
chr1:11863845	1	11863845	A	0.0143156	2864	0.0190703	0.105603	0.856693	0.859322	1	1
chr1:11864523	1	11864523	G	0.473915	2856	-0.0218732	-0.0250575	0.382705	0.391591	0.707474	0.997207
chr1:11864646	1	11864646	G	0.111732	2864	-0.0289392	-0.039111	0.459345	0.467714	0.257663	1
chr1:11865275	1	11865275	A	0.0574372	2864	0.0265987	0.0539341	0.621892	0.628367	0.491197	1
chr1:11866011	1	11866011	A	0.00139665	2864	0.436433	0.333881	0.191162	0.199523	1	1
chr1:11866379	1	11866379	A	0.0726511	2863	-0.0601396	-0.0480957	0.211148	0.219737	0.889623	0.999651
chr1:11866624	1	11866624	A	0.0432961	2864	0.0315748	0.0612647	0.606285	0.612979	1	1
chr1:11868282	1	11868282	A	0.0399791	2864	0.0666861	0.0646049	0.301972	0.311025	0.0880219	1
chr1:11868782	1	11868782	A	0.094656	2863	-0.0284132	-0.0419372	0.498078	0.506081	0.125424	0.999651
chr1:11869043	1	11869043	A	0.41463	2864	0.0314163	0.025057	0.209916	0.218492	0.376001	1
chr1:11869076	1	11869076	G	0.414366	2861	0.0324371	0.0250807	0.195904	0.204325	0.418519	0.998953
chr1:11869131	1	11869131	A	0.41463	2864	0.0314163	0.025057	0.209916	0.218492	0.376001	1
chr1:11869160	1	11869160	A	0.414425	2863	0.032567	0.0250637	0.193817	0.202212	0.396887	0.999651
chr1:11869175	1	11869175	A	0.371159	2864	0.029182	0.0256411	0.255081	0.263998	0.602946	1
chr1:11869897	1	11869897	G	0.389629	2854	0.0154383	0.0254608	0.54428	0.55177	0.608912	0.996508
chr1:11869924	1	11869924	A	0.0763452	2862	0.051025	0.0469794	0.277428	0.286435	1	0.999302
chr1:11870356	1	11870356	T	0.390189	2864	0.0181861	0.0253568	0.473246	0.48149	0.479877	1
chr1:11870491	1	11870491	A	0.00680866	2864	0.166888	0.1519	0.271911	0.280901	1	1
chr1:11870544	1	11870544	G	0.390189	2864	0.0181861	0.0253568	0.473246	0.48149	0.479877	1
chr1:11871247	1	11871247	G	0.433263	2862	0.0229864	0.0248676	0.355304	0.364296	0.26964	0.999302
chr1:11871712	1	11871712	A	0.389452	2863	0.0182553	0.0253569	0.471565	0.479825	0.455226	0.999651
chr1:11872058	1	11872058	A	0.433263	2862	0.0229864	0.0248676	0.355304	0.364296	0.26964	0.999302
chr1:11874213	1	11874213	A	0.433485	2864	0.0233676	0.024844	0.346923	0.355938	0.238193	1
chr1:11874782	1	11874782	G	0.433636	2863	0.0240168	0.0248493	0.333794	0.342836	0.23822	0.999651
chr1:11874799	1	11874799	G	0.43324	2861	0.0243575	0.0248664	0.327316	0.336366	0.253554	0.998953
chr1:11874890	1	11874890	A	0.0434859	2863	0.0317516	0.0611565	0.603632	0.610361	1	0.999651
chr1:11875214	1	11875214	G	0.433636	2863	0.0240168	0.0248493	0.333794	0.342836	0.23822	0.999651
chr1:11877464	1	11877464	C	0.0941877	2856	-0.0710041	-0.0428821	0.0977625	0.104142	0.741647	0.997207
chr1:11877707	1	11877707	C	0.0434859	2863	0.0317516	0.0611565	0.603632	0.610361	1	0.999651
chr1:11879071	1	11879071	A	0.43282	2858	0.0213085	0.0248866	0.391875	0.400715	0.269272	0.997905
chr1:11879796	1	11879796	A	0.389626	2863	0.0207518	0.0253362	0.412753	0.421472	0.409589	0.999651
chr1:11880226	1	11880226	A	0.454228	2862	0.0172592	0.0247053	0.484801	0.492936	0.187115	0.999302
chr1:11881241	1	11881241	A	0.021648	2864	-0.0708303	-0.0858058	0.409104	0.417846	1	1
chr1:11881310	1	11881310	A	0.473813	2864	0.00221537	0.0243462	0.927497	0.928838	0.00871461	1
chr1:11881323	1	11881323	C	0.0762919	2864	0.0428348	0.0468545	0.360606	0.369581	0.89445	1
chr1:11881366	1	11881366	A	0.0218302	2863	-0.0530008	-0.0848048	0.531989	0.539622	0.394727	0.999651
chr1:11881672	1	11881672	A	0.0721271	2863	-0.0684934	-0.048228	0.15555	0.163359	1	0.999651
chr1:11881803	1	11881803	G	0.474337	2864	0.000326221	0.024352	0.989312	0.98951	0.00972028	1
chr1:11881949	1	11881949	A	0.387919	2864	0.0192111	0.0253633	0.448788	0.457245	0.431416	1
chr1:11882981	1	11882981	G	0.0709034	2856	-0.0708121	-0.0487463	0.146317	0.153947	0.886616	0.997207
chr1:11883337	1	11883337	G	0.0373603	2864	0.0219773	0.0650604	0.735515	0.740241	0.290306	1
chr1:11885954	1	11885954	C	0.388596	2841	0.0165877	0.0255802	0.516689	0.524494	0.693071	0.991969
chr1:11886279	1	11886279	A	0.0433263	2862	0.0331899	0.0610299	0.586558	0.593517	0.654641	0.999302
chr1:11886826	1	11886826	A	0.388209	2858	0.0194155	0.0253775	0.444231	0.452724	0.478399	0.997905
chr1:11888379	1	11888379	A	0.0461055	2863	-0.0203193	-0.0584716	0.728211	0.733056	0.129938	0.999651
chr1:11889943	1	11889943	G	0.421089	2864	0.0193703	0.0250142	0.438711	0.447247	0.399144	1
chr1:11890492	1	11890492	C	0.398533	2863	0.00894835	0.0252075	0.722599	0.727536	0.349439	0.999651
chr1:11890665	1	11890665	G	0.393119	2863	0.0156828	0.0253844	0.536701	0.54428	0.666651	0.999651
chr1:11890783	1	11890783	G	0.0436453	2864	0.0354394	0.0608013	0.559979	0.567279	0.82073	1
chr1:11890844	1	11890844	T	0.00139714	2863	-0.331499	-0.298307	0.266453	0.275422	0.00488442	0.999651
chr1:11890860	1	11890860	A	0.398009	2863	0.0147011	0.0251924	0.559521	0.566827	0.292509	0.999651
chr1:11890924	1	11890924	A	0.389976	2863	0.013773	0.025401	0.587666	0.59461	0.609652	0.999651
rs2038028	1	11902143	A	0.388423	2859	0.0176766	0.0253047	0.484834	0.492968	0.287862	0.998254
rs2639453	1	11905131	A	0.202863	2864	0.00959306	0.0307921	0.755388	0.759783	0.563342	1
rs3818157	1	11949895	G	0.493017	2864	0.010333	0.0248396	0.677417	0.68307	0.793577	1
rs1810563	1	11976617	G	0.301334	2849	0.0188667	0.0270011	0.484715	0.49285	0.423123	0.994763
rs2297875	1	12064048	A	0.453561	2864	0.0393002	0.0252056	0.118953	0.125949	0.40715	1
rs12133231	1	12070340	A	0.254714	2864	-0.0225246	-0.0287331	0.433083	0.441662	0.588457	1
rs1148460	1	12139075	A	0.465608	2864	-0.0119741	-0.0247177	0.628079	0.634467	0.293131	1
rs1148459	1	12140439	A	0.466655	2864	-0.0125998	-0.0247265	0.610356	0.616993	0.329024	1
rs652284	1	12141399	A	0.476066	2862	-0.00689618	-0.0249439	0.782189	0.786129	0.970128	0.999302
rs590314	1	12146069	A	0.417249	2864	-0.0108208	-0.0253718	0.669751	0.675522	0.644711	1
rs522807	1	12146826	A	0.0569134	2864	0.0579992	0.0527556	0.271596	0.280584	0.0538301	1
rs652625	1	12147938	A	0.0818785	2864	0.0203428	0.0450349	0.651477	0.657523	0.320965	1
rs496888	1	12155393	G	0.334323	2864	0.00591975	0.0264897	0.823166	0.826393	0.768842	1
rs976881	1	12156341	A	0.294169	2864	-0.0167005	-0.0270444	0.536892	0.544469	0.280143	1
rs5745977	1	12162117	A	0.025838	2864	-0.0464259	-0.0779282	0.55134	0.558746	0.437626	1
rs3766730	1	12163263	A	0.157821	2864	-0.0205164	-0.0346193	0.553429	0.560809	0.159704	1
rs550132	1	12163637	G	0.0455816	2863	0.0843594	0.0599183	0.159159	0.167034	0.831717	0.999651
rs816050	1	12164578	A	0.222902	2860	-0.0140304	-0.0300009	0.640024	0.646239	0.787233	0.998603
rs17037696	1	12165861	A	0.273839	2863	9.6113e-05	0.0284497	0.997304	0.997354	0.0540617	0.999651
rs505844	1	12167616	G	0.275585	2863	-0.0014551	-0.0284376	0.959191	0.959948	0.0393551	0.999651
rs478143	1	12168295	C	0.283345	2864	0.0027651	0.0280646	0.921514	0.922965	0.107247	1
rs474247	1	12168762	A	0.196229	2864	-0.00921917	-0.0316184	0.770611	0.774748	0.407374	1
rs5746001	1	12171090	A	0.158694	2864	-0.0221549	-0.0345765	0.521684	0.529434	0.124102	1
rs945439	1	12171529	G	0.257682	2864	0.00422495	0.0287904	0.88333	0.885479	0.241501	1
rs1201157	1	12171618	A	0.424756	2864	0.0199041	0.025181	0.42927	0.437877	1	1
rs548580	1	12172357	A	0.255761	2864	0.00259269	0.028839	0.928365	0.92969	0.280327	1
rs5746016	1	12173566	A	0.072102	2864	-0.0227906	-0.0477543	0.633187	0.639501	0.399942	1
rs653667	1	12174395	C	0.387898	2859	-0.00790158	-0.0258363	0.759732	0.764054	0.3061	0.998254
rs1768642	1	12175479	A	0.259253	2864	0.00316184	0.0287949	0.912564	0.914179	0.173027	1
rs636964	1	12175938	G	0.203982	2863	-0.0171385	-0.0309802	0.580121	0.587164	0.862906	0.999651
rs235249	1	12180818	G	0.259518	2863	-0.00120693	-0.0289129	0.966703	0.96732	0.0719454	0.999651
rs5746053	1	12184885	A	0.193785	2864	0.0136605	0.0318399	0.667896	0.673696	0.281554	1
rs235219	1	12186942	A	0.0927025	2864	-0.0340294	-0.0425956	0.424351	0.432993	0.317484	1
rs5746061	1	12189178	G	0.223638	2864	-0.00494562	-0.0303883	0.870717	0.873094	0.0850981	1
rs1061628	1	12190586	A	0.38111	2864	0.00480892	0.0257126	0.85164	0.85436	0.781569	1
rs1061631	1	12191086	A	0.186976	2864	0.00569244	0.0318269	0.85805	0.860655	0.712481	1
rs235214	1	12194090	A	0.155552	2864	0.00959595	0.0345171	0.781008	0.784968	0.670123	1
rs7550488	1	12201519	A	0.240573	2864	0.0235445	0.0290392	0.417489	0.426177	0.758931	1
rs7547379	1	12229201	G	0.0226955	2864	0.00890402	0.0819827	0.913513	0.915111	0.0569681	1
rs12125606	1	12469281	A	0.225367	2862	-0.0205325	-0.0294727	0.486014	0.494137	0.218111	0.999302
rs6541035	1	12543132	A	0.232193	2864	0.00404894	0.0287812	0.888123	0.890184	0.00870996	1
rs11121943	1	12564163	G	0.0256634	2864	-0.0406947	-0.0781266	0.602449	0.609195	0.434378	1
rs12029485	1	12564830	C	0.0373603	2864	0.00665457	0.065663	0.919277	0.920769	1	1
rs12045736	1	12576622	G	0.453212	2864	-0.0158229	-0.0251368	0.52904	0.536708	0.651062	1
rs4846127	1	12586361	G	0.465722	2859	-0.0347838	-0.0251764	0.167093	0.175104	0.47517	0.998254
rs6689733	1	12602767	G	0.164455	2864	0.0317586	0.0336021	0.344589	0.35361	1	1
rs2256895	1	12642022	G	0.0459148	2864	0.0611364	0.059272	0.302327	0.311381	0.666528	1
rs2265711	1	12657361	G	0.0759427	2864	0.0533448	0.0462646	0.248895	0.257779	0.0839324	1
rs3010951	1	12680258	G	0.101955	2864	0.040896	0.0403569	0.310889	0.319947	0.040883	1
rs3000860	1	12698805	A	0.119239	2864	0.0233083	0.0385482	0.54541	0.552886	0.858658	1
rs3000858	1	12699907	G	0.157996	2864	0.0105309	0.0341353	0.757699	0.762055	0.944002	1
rs4240904	1	12708910	A	0.116969	2864	0.0136701	0.0392175	0.72741	0.732269	0.238745	1
rs2999877	1	13657649	G	0.134777	2864	0.0689019	0.0359247	0.055117	0.0597835	0.10925	1
rs11584331	1	13668384	A	0.115788	2863	0.0621848	0.0379168	0.100999	0.107481	0.00598012	0.999651
rs2924863	1	13670298	C	0.0181564	2864	0.0609509	0.094125	0.517275	0.525074	1	1
rs3013094	1	13670620	G	0.0179818	2864	0.0750047	0.0945622	0.427674	0.436292	1	1
rs3013101	1	13672722	G	0.129539	2864	0.0628475	0.0363616	0.0839156	0.0898188	0.0378262	1
rs3013105	1	13674912	G	0.398394	2864	0.00334638	0.0250895	0.893895	0.895851	0.128609	1
rs3856278	1	13732157	G	0.146278	2861	-0.00314985	-0.03455	0.927359	0.928703	0.0297417	0.998953
rs1148454	1	13783980	A	0.0867668	2864	0.0348706	0.043618	0.424026	0.43267	0.125696	1
rs12136848	1	13816762	C	0.00453911	2864	0.3136	0.185537	0.0909848	0.0971394	1	1
rs11587701	1	13819084	G	0.0825768	2864	0.0385475	0.0455497	0.397401	0.406212	0.62191	1
rs2487633	1	13852064	G	0.0961941	2864	0.0311164	0.0420583	0.459398	0.467766	0.590484	1
rs17393663	1	13904402	A	0.24642	2863	-0.018382	-0.0287522	0.522611	0.530351	0.614782	0.999651
rs1406417	1	13965452	C	0.0894792	2861	0.0640468	0.0437791	0.14348	0.151052	0.908977	0.998953
rs1210110	1	13969408	G	0.238478	2864	0.00673134	0.0286654	0.814345	0.817726	0.0395896	1
rs1203641	1	13992427	A	0.268949	2863	-0.00308729	-0.0274164	0.910342	0.911997	0.00889974	0.999651
rs2281161	1	14007024	A	0.189944	2864	-0.0562864	-0.031852	0.0772074	0.082855	0.715893	1
rs1203690	1	14034610	A	0.194832	2864	-0.0235199	-0.0316347	0.457189	0.465575	0.551318	1
rs12025627	1	14118384	A	0.0139665	2864	0.0418485	0.105523	0.691675	0.697107	0.428482	1
rs7543063	1	14125164	G	0.294169	2864	0.043934	0.0271566	0.105705	0.112331	0.528708	1
rs12133241	1	14132807	C	0.154949	2859	-0.103966	-0.0345674	0.00263291	0.00315865	0.668174	0.998254
rs12081055	1	14140629	G	0.451292	2864	-0.0149447	-0.0246518	0.54436	0.551849	0.104701	1
rs2884821	1	14168049	G	0.399965	2864	0.0450961	0.0255148	0.0771532	0.0827986	0.640593	1
rs7543486	1	14170601	A	0.355098	2864	0.000185625	0.026058	0.994316	0.994422	1	1
rs10927981	1	14186957	G	0.143256	2862	-0.0870546	-0.0356611	0.0146401	0.0165799	0.76052	0.999302
rs1883647	1	14213403	G	0.118017	2864	-0.0693712	-0.0384601	0.0712755	0.076682	0.719259	1
rs6669709	1	14215282	A	0.326117	2864	0.0307628	0.0266159	0.247761	0.256638	0.86496	1
rs2246175	1	14273937	A	0.314071	2864	-0.0570817	-0.0264517	0.0309312	0.0341802	0.152508	1
rs16853565	1	14282799	G	0.105971	2864	0.0456555	0.0406028	0.260825	0.26977	0.767153	1
rs12047577	1	14301762	A	0.243715	2864	-0.0550595	-0.0288528	0.0563541	0.0610821	0.612456	1
rs10928009	1	14306362	G	0.24389	2864	-0.0560394	-0.028798	0.0516611	0.056151	0.510088	1
rs12026462	1	14312607	G	0.244239	2864	-0.0556172	-0.0287989	0.0534547	0.0580372	0.543552	1
rs10928016	1	14314325	A	0.426152	2864	-0.0608493	-0.0252521	0.0159669	0.0180307	0.730945	1
rs12738487	1	14346392	G	0.15852	2864	-0.0389942	-0.0341289	0.253223	0.262131	0.944192	1
rs10429930	1	14363216	C	0.100559	2864	-0.0367811	-0.0407681	0.36695	0.375902	0.0982482	1
rs11591032	1	14368824	A	0.0460894	2864	0.0820181	0.0598562	0.170608	0.178676	0.522291	1
rs526188	1	14380116	G	0.413552	2863	-0.0229853	-0.0254463	0.366374	0.375328	0.512726	0.999651
rs4478803	1	14431668	A	0.0272346	2864	0.0327003	0.075572	0.66523	0.67107	0.15867	1
rs6668555	1	14452329	A	0.176327	2864	0.0230276	0.0324006	0.47726	0.485467	0.367922	1
rs11808667	1	14479928	G	0.0538219	2852	0.0376004	0.0544097	0.489528	0.497616	0.0942361	0.99581
rs13373827	1	14513207	A	0.107367	2864	0.0017667	0.0405897	0.965282	0.965926	0.380003	1
rs820626	1	14529687	C	0.318785	2864	-0.0350992	-0.0267312	0.189169	0.197505	0.965682	1
rs7513436	1	14543390	A	0.375961	2862	-0.0241073	-0.0255524	0.345454	0.354472	0.498436	0.999302
rs10754855	1	14615310	A	0.0740223	2864	-0.000929522	-0.0470499	0.984238	0.98453	0.221298	1
rs17402096	1	14674480	A	0.106844	2864	0.00264835	0.0401399	0.947395	0.94837	0.624774	1
rs7555566	1	14677461	G	0.126222	2864	-0.02351	-0.0374087	0.5297	0.53736	0.79945	1
rs4385705	1	14748619	A	0.476249	2863	-0.00365086	-0.0247217	0.882597	0.884758	0.349017	0.999651
rs10927466	1	14762658	A	0.319134	2864	-0.00385622	-0.026595	0.884713	0.886836	0.66718	1
rs6661767	1	14950154	C	0.425454	2864	-0.0311044	-0.0257061	0.226278	0.235005	0.0323053	1
rs1630519	1	14988795	C	0.298883	2864	-0.0291051	-0.0271049	0.282913	0.291935	0.721328	1
rs1737350	1	14995776	G	0.299057	2864	0.0146595	0.0272604	0.590744	0.597647	0.893621	1
rs3845594	1	15058996	A	0.342528	2864	0.00579786	0.0260985	0.824195	0.827403	0.561505	1
rs3845597	1	15062259	G	0.379714	2864	-0.00325935	-0.025427	0.898003	0.899884	0.341172	1
rs3765381	1	15062616	A	0.097067	2864	0.0252228	0.0424125	0.552043	0.55944	0.455609	1
rs4661542	1	15086272	C	0.049773	2863	0.0033727	0.0574056	0.95315	0.954017	1	0.999651
rs6429700	1	15206335	G	0.298043	2862	-0.0213256	-0.0273217	0.435075	0.443639	0.720993	0.999302
rs6681053	1	15207369	G	0.127095	2864	0.00901499	0.0376367	0.810697	0.814143	0.555103	1
rs4661561	1	15213642	A	0.0668879	2863	-0.0252604	-0.050239	0.615102	0.621674	0.547261	0.999651
rs6679504	1	15228810	A	0.466643	2863	-0.00304368	-0.0249342	0.902845	0.904638	0.910338	0.999651
rs6704367	1	15243919	G	0.0509777	2864	0.0109935	0.0564919	0.845704	0.84853	0.84555	1
rs16851308	1	15319660	A	0.0267109	2864	0.00281543	0.0773049	0.970948	0.971486	1	1
rs6429722	1	15370314	A	0.0752444	2864	0.0427464	0.0472351	0.365481	0.374439	1	1
rs7518884	1	15520415	A	0.30639	2864	-0.0162569	-0.0269147	0.545832	0.553304	0.660206	1
rs2253372	1	15596620	A	0.292074	2864	0.0141506	0.0269147	0.599058	0.60585	0.0519756	1
rs1883426	1	15598703	A	0.28544	2864	0.0113589	0.0270909	0.675005	0.680696	0.0488443	1
rs742362	1	15599378	G	0.106844	2864	-0.0208402	-0.0393931	0.596783	0.603606	0.0138751	1
rs555015	1	15645520	G	0.491795	2864	-0.0272663	-0.0249199	0.273886	0.282882	0.970194	1
rs4661627	1	15658782	A	0.359462	2864	-0.0450308	-0.0256421	0.0790661	0.0847863	0.19433	1
rs7556116	1	15669301	A	0.166201	2864	0.0235726	0.0333635	0.479853	0.488035	0.787508	1
rs3766160	1	15681459	A	0.275663	2864	0.0267227	0.0278543	0.337371	0.346406	0.888444	1
rs16851970	1	15916988	A	0.210545	2864	-0.00177026	-0.0307032	0.954022	0.954873	0.613011	1
rs12744547	1	15934965	G	0.221718	2864	0.00816395	0.0306538	0.789987	0.793793	0.0197987	1
rs904911	1	15999519	A	0.320705	2864	-0.00491085	-0.0262275	0.851472	0.854195	0.0653002	1
rs1122068	1	16000067	G	0.32088	2864	-0.00483619	-0.0262507	0.853832	0.856513	0.0863548	1
rs6677321	1	16021888	C	0.328561	2864	-0.00441623	-0.0259823	0.865033	0.867513	0.0307256	1
rs4661667	1	16035318	A	0.328911	2864	-0.0060106	-0.0259689	0.816962	0.820298	0.0277115	1
rs10927864	1	16038248	C	0.328911	2864	-0.0060106	-0.0259689	0.816962	0.820298	0.0277115	1
rs3979179	1	16179433	A	0.303946	2864	0.00259093	0.0267071	0.922716	0.924145	0.14525	1
rs1544131	1	16218322	A	0.0558659	2864	-0.0411832	-0.0529791	0.436954	0.445504	0.0193708	1
rs3754322	1	16219094	C	0.254015	2864	0.0162644	0.0283087	0.565605	0.572834	0.277954	1
rs1010069	1	16225524	A	0.441515	2864	-0.0124105	-0.024542	0.613079	0.619679	0.0207983	1
rs11260711	1	16322333	A	0.256983	2864	0.0207418	0.0284153	0.46542	0.473735	0.769241	1
rs3820610	1	16325585	G	0.290954	2863	0.0221096	0.0273286	0.418498	0.427179	0.751192	0.999651
rs6656611	1	16388392	A	0.362954	2864	-0.00851868	-0.0258771	0.742006	0.746625	0.967768	1
rs221031	1	16397456	G	0.230622	2864	0.00251326	0.0294253	0.931934	0.933193	0.635519	1
rs9629265	1	16559381	A	0.382158	2864	0.00365567	0.0255567	0.886257	0.888352	0.781785	1
rs6660924	1	16602287	G	0.488652	2864	0.0319207	0.0248443	0.198851	0.207307	0.822507	1
rs12145711	1	16615985	G	0.392284	2864	-0.00497258	-0.0253356	0.8444	0.84725	0.480516	1
rs2143808	1	17155012	A	0.127968	2864	0.00244019	0.0374477	0.948044	0.949007	0.675936	1
rs6691985	1	17162498	A	0.334439	2863	0.0327546	0.0259652	0.207136	0.215683	0.0851445	0.999651
rs2281376	1	17170174	G	0.108841	2839	-0.0325855	-0.0398748	0.413817	0.422529	0.384131	0.991271
rs7513616	1	17171083	G	0.451799	2863	0.0139701	0.0247707	0.57277	0.579909	0.273951	0.999651
rs9435732	1	17180745	A	0.263966	2864	0.0449495	0.0279026	0.107192	0.113862	0.194374	1
rs6684770	1	17198542	A	0.289281	2864	-0.0609725	-0.0273336	0.0257022	0.0285738	0.682803	1
rs6657613	1	17200787	T	0.488303	2864	0.0172753	0.024837	0.486712	0.494828	0.764866	1
rs3738814	1	17204263	G	0.456529	2864	-0.018526	-0.0248551	0.456054	0.464451	0.546904	1
rs2647168	1	17213465	A	0.0909567	2864	-0.067327	-0.0430109	0.117502	0.12446	0.429468	1
rs1022580	1	17232263	C	0.0274188	2863	0.0329301	0.0768611	0.668334	0.674127	0.72359	0.999651
rs2235928	1	17251616	G	0.208799	2864	0.0465257	0.0300881	0.122029	0.129106	0.0544453	1
rs2647209	1	17255149	G	0.0689595	2864	-0.0120263	-0.0485626	0.804409	0.807965	0.190786	1
rs12404121	1	17258691	G	0.357018	2864	0.0222593	0.0258845	0.389818	0.398669	0.68414	1
rs11203290	1	17262167	A	0.356193	2858	-0.00557912	-0.0258412	0.829066	0.832188	0.348503	0.997905
rs2235910	1	17298416	C	0.402933	2864	0.0304212	0.0252708	0.228663	0.237409	0.641295	1
rs877648	1	17334848	G	0.386419	2857	-0.00126456	-0.025543	0.960515	0.961247	0.843711	0.997556
rs2977265	1	17375797	A	0.326816	2864	-0.000742649	-0.0262735	0.97745	0.977868	0.269572	1
rs4384275	1	17406897	A	0.276049	2860	-0.0181956	-0.0274793	0.507871	0.515771	0.111732	0.998603
rs2977283	1	17414536	G	0.303247	2864	-0.0434328	-0.0273822	0.1127	0.119528	0.250323	1
rs2977313	1	17442536	G	0.17074	2864	-0.0142502	-0.0324353	0.660414	0.666327	0.0344421	1
rs12129306	1	17445836	C	0.0551676	2864	0.0739784	0.0541233	0.171673	0.179757	0.370729	1
rs3003438	1	17479147	A	0.15206	2864	0.0132377	0.0346848	0.702716	0.707973	1	1
rs4625336	1	17503551	A	0.181691	2862	-0.0305003	-0.032629	0.349911	0.358918	0.314441	0.999302
rs877551	1	17503940	A	0.397346	2864	0.044939	0.025524	0.0782961	0.0839864	0.696581	1
rs1635576	1	17538913	C	0.129539	2864	-0.0249147	-0.0371529	0.502476	0.510433	0.933973	1
rs2240335	1	17547124	A	0.332228	2864	0.0226741	0.0262474	0.387665	0.396526	0.448713	1
rs1204898	1	17580326	A	0.262221	2864	-0.0319443	-0.0279887	0.253734	0.262644	0.209277	1
rs6688886	1	17626226	A	0.379888	2864	0.00514043	0.0252893	0.838928	0.841875	0.121902	1
rs1408420	1	17627402	A	0.381809	2864	0.00666422	0.0252703	0.791998	0.795768	0.122756	1
rs2883272	1	17645746	A	0.189095	2861	0.00430044	0.0320143	0.893143	0.895113	0.54255	0.998953
rs12078935	1	17664469	A	0.425952	2863	0.0258105	0.0253176	0.307982	0.317039	0.540903	0.999651
rs2477735	1	17741766	G	0.0874956	2863	0.012571	0.0436848	0.773526	0.777615	0.3478	0.999651
rs4920376	1	17773392	A	0.0221718	2864	-0.0365351	-0.084226	0.664452	0.670304	0.649816	1
rs12724758	1	17800846	G	0.188373	2864	-0.00827828	-0.0312612	0.791156	0.794941	0.0502843	1
rs6672746	1	17813761	A	0.0228701	2864	0.0398273	0.0829673	0.631202	0.637545	0.659873	1
rs12562076	1	17830827	G	0.182612	2864	-0.0136195	-0.032021	0.670596	0.676355	0.491158	1
rs3766306	1	17842165	A	0.176327	2864	-0.0564934	-0.0325803	0.0829228	0.0887892	0.796971	1
rs16830757	1	17997114	A	0.194134	2864	0.00591757	0.0314945	0.850961	0.853694	1	1
rs1541161	1	18103204	A	0.0577863	2864	-0.0130267	-0.0524628	0.803899	0.807463	0.0822726	1
rs4920651	1	18105060	A	0.448161	2855	0.0336973	0.0252198	0.181503	0.189734	0.596324	0.996858
rs12029767	1	18111249	G	0.0509955	2863	-0.026985	-0.055515	0.626907	0.633312	0.0490986	0.999651
rs11203245	1	18156012	C	0.485335	2864	0.000320339	0.0246671	0.989639	0.989831	0.278328	1
rs1192607	1	18183163	A	0.122381	2864	-0.0624886	-0.0373807	0.0945872	0.100863	0.0816872	1
rs875294	1	18216138	C	0.431564	2864	0.028089	0.0251845	0.264709	0.273671	0.878927	1
rs12132348	1	18227737	G	0.493541	2864	0.0238782	0.0251108	0.341649	0.350676	0.410861	1
rs4920430	1	18310916	G	0.134951	2864	-0.011534	-0.0363561	0.751053	0.755521	0.74903	1
rs4920440	1	18348085	A	0.34148	2864	-0.0663087	-0.0259302	0.0105519	0.0120807	0.183765	1
rs9727014	1	18348774	A	0.320705	2864	0.0395149	0.0268977	0.141811	0.149348	0.390994	1
rs17435169	1	18368746	A	0.280726	2864	-0.0369095	-0.0277249	0.183097	0.191351	0.963129	1
rs12039774	1	18374768	A	0.275663	2864	0.0500848	0.0276039	0.0696149	0.0749512	0.326161	1
rs9728569	1	18382620	A	0.440622	2863	-0.0236386	-0.0250083	0.344543	0.353564	0.761674	0.999651
rs12749656	1	18383380	A	0.0703561	2864	0.0161518	0.0486206	0.739737	0.744393	0.774905	1
rs12401679	1	18470345	G	0.207751	2864	-0.0159382	-0.0302965	0.598838	0.605633	0.15622	1
rs12566510	1	18578281	G	0.0707794	2861	-0.065912	-0.0480003	0.169703	0.177757	0.198335	0.998953
rs9662941	1	18609123	A	0.204958	2864	-0.0599578	-0.0305252	0.0495063	0.0538823	0.27581	1
rs869080	1	18624451	G	0.328676	2863	0.0189769	0.0267835	0.478616	0.48681	0.309593	0.999651
rs10907312	1	18658053	G	0.459497	2864	-0.0458812	-0.0252124	0.0687914	0.0740924	0.309978	1
rs11589176	1	18667354	A	0.00855746	2863	-0.0572442	-0.133022	0.666952	0.672766	0.187091	0.999651
rs2992764	1	18676731	G	0.366923	2863	-0.000275683	-0.0256375	0.99142	0.99158	0.398327	0.999651
rs682616	1	18907096	G	0.111906	2864	-0.0543847	-0.0396079	0.169728	0.177782	0.778504	1
rs2743197	1	18913849	A	0.213513	2864	-0.0740839	-0.0305157	0.0151938	0.0171858	0.823881	1
rs12732543	1	18966099	G	0.0483589	2864	0.0168613	0.058651	0.773741	0.777825	0.412261	1
rs11261076	1	19011540	T	0.235417	2863	0.000853536	0.0292914	0.976753	0.977184	0.795366	0.999651
rs12063142	1	19012104	A	0.298708	2864	0.0181086	0.0270994	0.503988	0.511929	0.688246	1
rs12028479	1	19017724	A	0.0906075	2864	-0.0292518	-0.0434444	0.500746	0.508721	1	1
rs6603918	1	19030520	A	0.0973498	2830	-0.0410768	-0.0426449	0.335433	0.344472	0.336732	0.988128
rs3762396	1	19382981	A	0.385649	2864	0.0571538	0.0251929	0.02329	0.0259757	0.114768	1
rs12121004	1	19401434	G	0.1343	2863	-0.00765971	-0.03695	0.835776	0.838779	0.259895	0.999651
rs17393888	1	19415518	A	0.119937	2864	-0.0285726	-0.0387212	0.460572	0.468929	0.329491	1
rs709683	1	19437931	C	0.366096	2864	-0.0317148	-0.0256806	0.216842	0.225486	0.5195	1
rs710865	1	19441559	G	0.370461	2864	-0.0374206	-0.0255642	0.143252	0.150819	0.378353	1
rs1063986	1	19459158	G	0.0934008	2864	-0.0636636	-0.042957	0.138332	0.145794	0.740974	1
rs12146076	1	19517942	G	0.298534	2864	-0.00608678	-0.0270539	0.821989	0.825236	0.561875	1
rs7523414	1	19535600	G	0.0469787	2863	-0.000231576	-0.0591887	0.996878	0.996936	0.833166	0.999651
rs12124339	1	19542597	A	0.0464385	2864	-0.000347226	-0.0594615	0.995341	0.995427	0.832138	1
rs17477654	1	19553131	G	0.264161	2860	0.0197474	0.0277925	0.477377	0.485583	0.0753132	0.998603
rs884630	1	19587898	A	0.402026	2863	0.0211553	0.0253698	0.404349	0.41312	0.938031	0.999651
rs12066114	1	19665114	G	0.255237	2864	-0.033262	-0.0286242	0.245225	0.254088	0.844133	1
rs12755497	1	19665149	G	0.328911	2864	-0.0114477	-0.0265398	0.666221	0.672046	0.898986	1
rs4362008	1	19710145	G	0.21496	2861	-0.027908	-0.0305345	0.360726	0.369701	0.61801	0.998953
rs4912122	1	19749025	A	0.344274	2864	-0.00167997	-0.0260768	0.948633	0.949584	0.59064	1
rs2792043	1	19797249	A	0.463687	2864	-0.00967415	-0.025123	0.700184	0.705482	0.52314	1
rs3762387	1	19841899	A	0.0439944	2864	0.0465223	0.061618	0.450242	0.458687	0.175613	1
rs2294630	1	19854378	G	0.497902	2860	-0.0330256	-0.024851	0.183866	0.192131	0.764878	0.998603
rs3929668	1	19924960	A	0.358365	2863	-0.00547911	-0.0260004	0.833097	0.836147	0.903028	0.999651
rs960242	1	19930826	A	0.029743	2841	0.14763	0.0729343	0.042955	0.0469654	0.31492	0.991969
rs1541185	1	20014115	A	0.285365	2863	-0.0136865	-0.0279	0.623739	0.630189	0.251877	0.999651
rs7532822	1	20044471	A	0.208799	2864	0.00974692	0.0309013	0.752442	0.756887	0.396459	1
rs16860415	1	20071414	A	0.0232193	2864	-0.12434	-0.0829973	0.134101	0.141468	1	1
rs12083280	1	20148455	G	0.185709	2862	0.0173436	0.0317948	0.585419	0.592393	0.422284	0.999302
rs1891320	1	20169698	A	0.325594	2864	-0.0158304	-0.0267952	0.554659	0.562024	0.394726	1
rs11677	1	20174551	A	0.09375	2864	-0.0488902	-0.0424767	0.249737	0.258626	0.509596	1
rs16860431	1	20261943	A	0.0521997	2864	0.0404673	0.0549922	0.461808	0.470155	0.0571199	1
rs3179690	1	20390813	A	0.151187	2864	-0.037046	-0.0345181	0.283166	0.292188	0.423066	1
rs737647	1	20409172	G	0.34148	2864	0.0112919	0.0263072	0.667754	0.673555	0.900811	1
rs2213801	1	20417422	A	0.236208	2864	0.00625436	0.0293094	0.831022	0.834109	1	1
rs10916724	1	20422959	G	0.236815	2863	0.0144026	0.0293088	0.623137	0.629595	1	0.999651
rs10916732	1	20442874	A	0.102828	2864	-0.00912898	-0.0410357	0.823953	0.827165	1	1
rs10489156	1	20448489	G	0.394378	2864	0.0180166	0.0251347	0.473497	0.481739	0.147872	1
rs4655167	1	20449617	G	0.095845	2864	-0.0258087	-0.0425982	0.544606	0.552092	0.589052	1
rs763203	1	20471969	A	0.330133	2864	-0.0137872	-0.0264327	0.601952	0.608704	0.800031	1
rs4655192	1	20505892	A	0.327978	2863	-0.0120274	-0.0265037	0.649973	0.656042	0.932442	0.999651
rs4654851	1	20516531	G	0.249476	2864	0.0157882	0.0286749	0.581913	0.588933	0.726829	1
rs230182	1	20551138	G	0.101257	2864	-0.0324445	-0.041453	0.433814	0.442388	0.682257	1
rs4655204	1	20585003	G	0.243276	2863	0.0103194	0.0293842	0.725446	0.730337	0.223086	0.999651
rs10916785	1	20603704	G	0.401362	2864	0.0149018	0.0253797	0.5571	0.564435	0.907142	1
rs12741740	1	20671182	A	0.321516	2863	-0.0305388	-0.0269724	0.257541	0.266471	0.247419	0.999651
rs645548	1	20739286	A	0.0686103	2864	-0.0382431	-0.0487885	0.433125	0.441703	0.304151	1
rs12564872	1	20746434	G	0.0239343	2862	0.121678	0.0818123	0.136941	0.144373	1	0.999302
rs471760	1	20789793	A	0.29993	2864	-0.0169353	-0.0272007	0.533544	0.54116	1	1
rs1614627	1	20819343	A	0.0921007	2861	0.0391016	0.0427927	0.360851	0.369825	0.372587	0.998953
rs1043502	1	20850335	C	0.311736	2863	0.000205191	0.0271065	0.99396	0.994072	0.433344	0.999651
rs10157351	1	20869927	C	0.418093	2863	0.00621514	0.0250584	0.804114	0.807675	0.420009	0.999651
rs4143111	1	20886133	A	0.135824	2864	0.0437967	0.0362161	0.226542	0.235271	0.749989	1
rs521424	1	20897330	A	0.401362	2864	0.0303308	0.0254409	0.233182	0.241963	0.876415	1
rs2296225	1	20903629	G	0.0770979	2860	0.0350746	0.0457967	0.44375	0.452247	0.0470167	0.998603
rs2274120	1	20975386	G	0.082926	2864	0.054703	0.0447266	0.22131	0.229995	0.269894	1
rs12565504	1	21005162	A	0.0116969	2864	0.204292	0.116429	0.0793193	0.0850493	1	1
rs3767239	1	21035895	G	0.10824	2864	0.0466676	0.0398983	0.242136	0.250979	0.62819	1
rs2305463	1	21052768	G	0.442717	2863	-0.0194918	-0.0253196	0.4414	0.449916	0.289189	0.999651
rs17450586	1	21127180	C	0.449197	2864	0.00312808	0.0253549	0.901813	0.903624	0.186301	1
rs2038089	1	21424044	G	0.44132	2863	-0.00208486	-0.0250899	0.933775	0.935001	1	0.999651
rs9426748	1	21431077	A	0.440426	2862	-0.00529685	-0.025111	0.832936	0.83599	0.939577	0.999302
rs212540	1	21465704	G	0.387744	2864	-0.00601898	-0.0257576	0.815235	0.818601	0.431179	1
rs213037	1	21528471	A	0.103177	2864	0.0436792	0.0411224	0.288155	0.297189	0.686565	1
rs4654918	1	21529826	A	0.0417249	2864	0.0635676	0.0625365	0.309397	0.318455	0.816889	1
rs1827293	1	21667975	A	0.45199	2864	-0.00941118	-0.024829	0.704659	0.709885	0.406897	1
rs10799701	1	21693577	A	0.449372	2864	-0.0197414	-0.024878	0.427471	0.436091	0.520961	1
rs1780324	1	21694344	A	0.448324	2864	-0.0176285	-0.0249242	0.479391	0.487578	0.650309	1
rs1697421	1	21695879	A	0.499651	2862	0.00752838	0.0246692	0.760234	0.764548	0.278439	0.999302
rs4654755	1	21716195	G	0.387744	2864	0.00855552	0.025658	0.738799	0.74347	0.693891	1
rs6665848	1	21837750	A	0.0593575	2864	0.0354821	0.0528716	0.502157	0.510118	0.867094	1
rs2625408	1	21851817	G	0.39368	2864	-0.0174983	-0.0256676	0.495411	0.503441	0.457121	1
rs12128325	1	21875454	A	0.192979	2863	0.00327601	0.031294	0.916626	0.918166	0.308084	0.999651
rs12742372	1	22008177	T	0.058042	2860	-0.00797493	-0.0534184	0.881324	0.883508	1	0.998603
rs12404444	1	22063520	A	0.196404	2864	-0.0269321	-0.0313902	0.390904	0.399749	0.905783	1
rs7531732	1	22148283	A	0.00558659	2864	0.15179	0.162444	0.350093	0.359099	0.0833884	1
rs4504857	1	22178493	A	0.0209497	2864	-0.081169	-0.0871712	0.351779	0.360781	1	1
rs10799722	1	22181103	C	0.025847	2863	-0.0368281	-0.0784631	0.638807	0.64504	0.715146	0.999651
rs7520656	1	22184626	G	0.0625	2856	0.00419402	0.0513963	0.934964	0.936167	0.748895	0.997207
rs16826354	1	22264354	A	0.0253142	2864	0.0202707	0.0791752	0.797933	0.801601	0.70422	1
rs17837966	1	22267300	A	0.00122292	2862	-0.599816	-0.356524	0.0924913	0.0986973	1	0.999302
rs7526484	1	22324432	A	0.251746	2864	-0.0425465	-0.0283476	0.133386	0.140737	0.215122	1
rs10917157	1	22325911	G	0.0418994	2864	0.0335589	0.0605931	0.579688	0.586737	0.0156414	1
rs7521902	1	22363311	A	0.262395	2864	-0.000763961	-0.0283825	0.978526	0.978924	0.809247	1
rs2807357	1	22364571	G	0.328911	2864	-0.0110743	-0.0263983	0.674846	0.680539	0.672095	1
rs909813	1	22369290	G	0.217353	2864	-0.019064	-0.0300013	0.525143	0.532855	0.47512	1
rs3856181	1	22425556	G	0.304784	2843	0.0152694	0.0269393	0.570845	0.578008	0.425949	0.992668
rs2807321	1	22427478	A	0.0764665	2864	-0.038534	-0.046473	0.407009	0.415764	0.35577	1
rs11810369	1	22560238	A	0.137744	2864	-0.00243956	-0.0359917	0.94596	0.94696	0.693852	1
rs11810751	1	22564184	C	0.145601	2864	0.0289742	0.0345873	0.402192	0.410975	0.0240844	1
rs4409621	1	22605336	A	0.106145	2864	-0.0224194	-0.0400054	0.575201	0.582308	0.277658	1
rs12725956	1	22660741	G	0.342877	2864	0.0403755	0.0264552	0.126964	0.134163	0.384131	1
rs209734	1	22754977	A	0.0103003	2864	-0.0256844	-0.123949	0.83584	0.838842	1	1
rs682658	1	22841402	A	0.496157	2862	-0.00531382	-0.0252548	0.833349	0.836395	0.178284	0.999302
rs629409	1	22859325	A	0.140712	2864	-0.0680332	-0.0360884	0.0594056	0.0642816	0.439292	1
rs6687487	1	22934138	A	0.0934008	2864	0.0697342	0.0423287	0.0994666	0.105901	0.269121	1
rs12723359	1	23010348	G	0.303073	2864	0.0212168	0.0273475	0.437854	0.446397	0.352881	1
rs7545588	1	23065692	C	0.0458202	2859	-0.103831	-0.0600797	0.0839474	0.0898517	0.521696	0.998254
rs744834	1	23119982	A	0.482716	2864	-0.0501949	-0.0249969	0.0446383	0.0487455	0.708321	1
rs309517	1	23124179	T	0.331878	2864	0.0206437	0.026575	0.437271	0.445818	0.613141	1
rs620514	1	23151219	G	0.271648	2864	-0.019709	-0.0285501	0.489987	0.498071	0.047275	1
rs2072944	1	23278459	G	0.449005	2863	-0.00488967	-0.0250348	0.845147	0.847983	0.969869	0.999651
rs1983965	1	23292442	A	0.146175	2863	-0.0135714	-0.035375	0.701243	0.706523	0.8222	0.999651
rs1208932	1	23301709	A	0.40625	2864	-0.01639	-0.0252519	0.516299	0.524109	0.587607	1
rs16827981	1	23308125	A	0.151536	2864	0.00529742	0.0345717	0.878217	0.880458	0.611618	1
rs16828054	1	23413130	A	0.12692	2864	-0.0260456	-0.0373498	0.485589	0.493716	0.866137	1
rs2903545	1	23413695	G	0.381069	2863	-0.0354061	-0.0257966	0.169905	0.177962	0.606662	0.999651
rs12567682	1	23491293	G	0.228701	2864	-0.0141488	-0.0301416	0.638776	0.64501	0.100589	1
rs17437121	1	23513250	G	0.140189	2864	-0.0149201	-0.0362554	0.680686	0.686289	0.278375	1
rs12127143	1	23563260	A	0.0336941	2864	0.0415362	0.0690897	0.547712	0.555161	1	1
rs10737472	1	23581506	C	0.13157	2854	0.0169464	0.0367586	0.644785	0.650931	0.681881	0.996508
rs686546	1	23582764	A	0.0671329	2860	0.00686554	0.0500473	0.890888	0.892899	0.656202	0.998603
rs2298632	1	23583062	G	0.480272	2864	-0.00945916	-0.0251441	0.70677	0.711962	0.368976	1
rs12126283	1	23585212	A	0.0567586	2863	0.0339608	0.0538811	0.528505	0.536178	1	0.999651
rs1212034	1	23587252	G	0.138879	2819	0.000991826	0.0365258	0.978337	0.978738	0.529234	0.984288
rs1767141	1	23606937	A	0.081761	2862	-0.00201756	-0.0457916	0.964857	0.965508	0.532898	0.999302
rs716243	1	23619212	G	0.246681	2862	-0.0478503	-0.0294052	0.103679	0.110244	0.087414	0.999302
rs7520038	1	23627409	A	0.0232193	2864	0.0354474	0.0836834	0.671865	0.677604	0.40479	1
rs1198430	1	23628100	A	0.0954958	2864	-0.00702256	-0.04263	0.869154	0.871559	0.588252	1
rs1198433	1	23629282	A	0.118715	2864	-0.00188341	-0.0391101	0.961591	0.962303	0.107399	1
rs1767148	1	23638059	A	0.0957038	2863	-0.00886978	-0.0425157	0.834742	0.837764	0.745613	0.999651
rs1077514	1	23638820	G	0.123603	2864	-0.00394071	-0.0384402	0.918348	0.919857	0.101045	1
rs876583	1	23650261	A	0.0232193	2864	0.0354474	0.0836834	0.671865	0.677604	0.40479	1
rs2077066	1	23650949	G	0.297311	2864	0.00790636	0.0273983	0.77291	0.777008	0.62273	1
rs12122778	1	23688961	A	0.0525489	2864	0.0155816	0.0560217	0.780908	0.78487	1	1
rs3218148	1	23724374	G	0.412011	2864	0.00593105	0.0253584	0.815071	0.81844	0.877471	1
rs3218126	1	23729126	A	0.0600768	2863	0.0535207	0.0536255	0.318257	0.327314	0.0117994	0.999651
rs3218121	1	23730904	A	0.0600768	2863	0.0535207	0.0536255	0.318257	0.327314	0.0117994	0.999651
rs11574	1	23758085	A	0.291667	2856	-0.045063	-0.0275483	0.101885	0.108395	0.751266	0.997207
rs2076345	1	23956081	A	0.366271	2864	0.0227948	0.0258648	0.378151	0.387057	0.935872	1
rs17184588	1	24238099	A	0.497556	2864	0.0212825	0.0252557	0.399406	0.408205	0.166695	1
rs11586125	1	24249913	G	0.188373	2864	-0.00924421	-0.0320436	0.772973	0.777071	0.624845	1
rs4649163	1	24252188	A	0.280901	2864	0.0080469	0.0277733	0.772019	0.776133	0.817121	1
rs6424147	1	24254885	G	0.0391061	2864	-0.00489635	-0.0640469	0.939061	0.940189	0.622506	1
rs4378147	1	24287634	A	0.331529	2864	0.00139095	0.026631	0.958345	0.959117	0.473736	1
rs11249142	1	24294391	G	0.427324	2862	-0.0398275	-0.0249721	0.110739	0.117512	0.380009	0.999302
rs4292900	1	24342401	A	0.300978	2864	0.00367516	0.0275518	0.893884	0.895841	0.131025	1
rs12131116	1	24371968	A	0.00576117	2864	0.132303	0.164973	0.42257	0.431224	1	1
rs6680101	1	24380020	G	0.400602	2822	0.00164958	0.0255206	0.948463	0.949417	0.753864	0.985335
rs7532146	1	24383519	G	0.0521997	2864	-0.0780862	-0.0551436	0.15676	0.164592	0.126468	1
rs10794648	1	24390793	A	0.274441	2864	-0.0295509	-0.0281856	0.294437	0.303481	0.280834	1
rs7552167	1	24391230	A	0.140761	2863	-0.0770567	-0.035936	0.0320108	0.0353337	0.757132	0.999651
rs10489438	1	24578275	A	0.125218	2863	-0.0263943	-0.037614	0.482857	0.491011	1	0.999651
rs10489442	1	24621666	A	0.262046	2864	0.0126413	0.0285484	0.657909	0.663859	0.439417	1
rs1008485	1	24637276	A	0.269553	2864	0.0191749	0.0277884	0.490174	0.498256	0.296805	1
rs12117331	1	24669425	G	0.203458	2863	-0.0359936	-0.0311689	0.248176	0.257056	0.48897	0.999651
rs12064694	1	24688457	A	0.10824	2864	-0.0178855	-0.0398263	0.653368	0.659387	0.497809	1
rs4601530	1	24916698	A	0.258031	2864	0.0151422	0.0283408	0.59314	0.600012	0.66081	1
rs4295833	1	25058373	A	0.126008	2853	-0.0419802	-0.0374478	0.262275	0.271226	0.610902	0.996159
rs17360973	1	25069864	A	0.0418994	2864	0.0573365	0.0624084	0.358236	0.367219	0.816899	1
rs6686594	1	25071869	G	0.477654	2864	-0.0111946	-0.0249485	0.653641	0.659655	0.940303	1
rs11580498	1	25085260	C	0.337352	2862	0.0256078	0.0262101	0.328559	0.337607	0.615844	0.999302
rs7513064	1	25088618	G	0.154155	2864	0.0371705	0.0345621	0.282164	0.291184	0.942881	1
rs6663310	1	25094966	G	0.336243	2864	-0.00194111	-0.0262486	0.941049	0.942141	0.675487	1
rs7536526	1	25102718	A	0.051188	2862	0.101626	0.0571894	0.0755665	0.0811489	0.244923	0.999302
rs6688452	1	25109521	G	0.0855447	2864	-0.0619339	-0.0442206	0.161344	0.169257	0.472497	1
rs2236851	1	25116141	A	0.187849	2864	0.0496256	0.032165	0.122868	0.129966	0.425847	1
rs10903118	1	25167465	G	0.476249	2863	-0.00431631	-0.0254214	0.865175	0.867652	0.0721528	0.999651
rs12144291	1	25203046	A	0.0508031	2864	-0.0517948	-0.0561792	0.356552	0.36554	0.327547	1
rs311469	1	25203998	A	0.218509	2858	0.00267908	0.0298761	0.928547	0.929868	0.298076	0.997905
rs10794641	1	25249135	A	0.140734	2860	0.0147917	0.0362977	0.683633	0.689191	0.2155	0.998603
rs380149	1	25268346	G	0.397172	2864	0.0191187	0.0251407	0.446976	0.455447	0.184563	1
rs7533661	1	25286053	A	0.0946229	2864	0.002694	0.0417543	0.948556	0.949509	0.0487105	1
rs803302	1	25328122	A	0.0122207	2864	0.0521002	0.11403	0.647742	0.653844	1	1
rs742393	1	25398468	A	0.178309	2863	-0.0482133	-0.0324466	0.137299	0.144738	0.798659	0.999651
chr1:25398494	1	25398494	A	0.349509	2854	-0.00863303	-0.0259078	0.738967	0.743636	0.266687	0.996508
chr1:25398502	1	25398502	G	0.216655	2864	-0.0447511	-0.0300415	0.136318	0.143736	0.544805	1
chr1:25399078	1	25399078	A	0.00174581	2864	0.1131	0.298522	0.704786	0.71001	1	1
chr1:25400174	1	25400174	A	0.245721	2863	-0.00898424	-0.0289421	0.756241	0.760622	0.959809	0.999651
chr1:25400344	1	25400344	A	0.0261872	2864	-0.176736	-0.0778856	0.0232578	0.025941	1	1
rs7414501	1	25400368	A	0.100209	2864	-0.0194645	-0.0412918	0.637363	0.643617	0.605094	1
chr1:25400531	1	25400531	A	0.100384	2864	-0.0222852	-0.0411045	0.587709	0.594653	0.406881	1
rs2375278	1	25401625	A	0.175105	2864	0.039293	0.0331052	0.235262	0.244058	0.271769	1
chr1:25402906	1	25402906	C	0.00139665	2864	-0.217625	-0.272318	0.424199	0.432842	6.40049e-06	1
chr1:25406181	1	25406181	G	0.0359637	2864	-0.203772	-0.0670056	0.00235703	0.00283835	1	1
chr1:25413819	1	25413819	A	0.161183	2857	0.035879	0.0342433	0.294746	0.303791	0.368073	0.997556
chr1:25414518	1	25414518	A	0.1616	2862	0.0358581	0.0341827	0.294173	0.303217	0.301446	0.999302
chr1:25427306	1	25427306	A	0.0267109	2864	0.0174542	0.0772361	0.821213	0.824473	1	1
chr1:25429691	1	25429691	A	0.0485505	2863	-0.112583	-0.0581162	0.0527201	0.0572649	1	0.999651
chr1:25437801	1	25437801	T	0.00279623	2861	0.309027	0.236133	0.190637	0.198992	1	0.998953
chr1:25438792	1	25438792	A	0.038757	2864	-0.0971827	-0.06522	0.136204	0.143619	0.443813	1
chr1:25438884	1	25438884	A	0.0186932	2862	-0.0288103	-0.0886114	0.745082	0.749649	0.00274477	0.999302
rs1043879	1	25442668	G	0.248865	2863	-0.0121769	-0.0285943	0.670216	0.67598	0.453286	0.999651
chr1:25444638	1	25444638	A	0.0358141	2862	-0.0203685	-0.0666217	0.759808	0.764129	0.412774	0.999302
chr1:25457563	1	25457563	G	0.154853	2864	0.0286985	0.0347722	0.409185	0.417926	0.317177	1
chr1:25539334	1	25539334	A	0.0265549	2862	-0.0439502	-0.0755014	0.560492	0.567785	0.0139658	0.999302
chr1:25540075	1	25540075	G	0.0267109	2864	-0.046416	-0.0752674	0.537445	0.545016	0.0147944	1
chr1:25541301	1	25541301	G	0.44689	2862	-0.026833	-0.0250959	0.28497	0.293996	0.879776	0.999302
chr1:25541644	1	25541644	C	0.15625	2864	0.0287858	0.034561	0.404901	0.413669	0.43584	1
chr1:25545390	1	25545390	A	0.00628492	2864	-0.190759	-0.158159	0.227771	0.236511	1	1
chr1:25545393	1	25545393	A	0.00351124	2848	-0.0361638	-0.211309	0.864112	0.866608	1	0.994413
rs3091242	1	25547372	G	0.448637	2862	-0.0285575	-0.0250444	0.254172	0.263084	1	0.999302
chr1:25553431	1	25553431	A	0.00855746	2863	0.082745	0.130484	0.525991	0.533694	0.0172896	0.999651
chr1:25555679	1	25555679	A	0.123953	2864	0.025937	0.0382251	0.497434	0.505443	0.262923	1
chr1:25556599	1	25556599	G	0.448673	2864	-0.0278654	-0.0250202	0.265401	0.274366	0.969884	1
chr1:25559895	1	25559895	G	0.0426247	2827	-0.17812	-0.0615679	0.00381498	0.00451955	0.641943	0.987081
chr1:25560329	1	25560329	A	0.0352654	2864	0.0474966	0.0673599	0.480738	0.488912	0.779737	1
chr1:25560488	1	25560488	G	0.447451	2864	-0.0258424	-0.0250794	0.302812	0.311867	0.879862	1
rs9689	1	25560863	A	0.448499	2864	-0.0266846	-0.0250496	0.286753	0.295783	0.969867	1
chr1:25568422	1	25568422	A	0.155606	2863	0.0370114	0.0344617	0.282828	0.29185	0.776417	0.999651
chr1:25572293	1	25572293	A	0.0359762	2863	-0.00733609	-0.0664512	0.912094	0.913717	0.416497	0.999651
chr1:25577567	1	25577567	T	0.0177069	2852	-0.0133898	-0.0954585	0.888448	0.890503	1	0.99581
chr1:25578011	1	25578011	A	0.0240922	2864	0.0131122	0.0810049	0.871409	0.873773	0.68053	1
chr1:25580279	1	25580279	A	0.0459148	2864	0.0315289	0.0590212	0.593206	0.600077	0.388994	1
chr1:25582997	1	25582997	T	0.00785889	2863	0.0992728	0.138501	0.473518	0.48176	0.159914	0.999651
rs666686	1	25592098	A	0.446578	2864	-0.0244911	-0.0250439	0.328109	0.337158	1	1
rs686631	1	25592186	A	0.446036	2863	-0.0239626	-0.0250595	0.338956	0.347988	1	0.999651
chr1:25608740	1	25608740	A	0.00715782	2864	0.0726782	0.148212	0.623875	0.630322	1	1
chr1:25613434	1	25613434	A	0.447975	2864	-0.0213151	-0.0250848	0.39548	0.404301	0.850219	1
chr1:25614937	1	25614937	G	0.00594198	2861	0.104131	0.162502	0.521654	0.529405	1	0.998953
rs4649084	1	25625204	A	0.449895	2864	-0.0244944	-0.0251092	0.329304	0.338352	0.734163	1
rs11249248	1	25625638	A	0.449895	2864	-0.0244944	-0.0251092	0.329304	0.338352	0.734163	1
chr1:25626152	1	25626152	G	0.450943	2864	-0.0250588	-0.0250975	0.318057	0.327114	0.762766	1
chr1:25626225	1	25626225	G	0.45007	2864	-0.0237476	-0.0251164	0.344403	0.353424	0.705988	1
chr1:25626612	1	25626612	C	0.429471	2857	-0.00966373	-0.0252604	0.702043	0.707311	0.848619	0.997556
rs909833	1	25626727	G	0.450035	2862	-0.0238471	-0.0251132	0.342324	0.35135	0.734119	0.999302
chr1:25627416	1	25627416	A	0.0715782	2864	-0.0151631	-0.0483835	0.753981	0.758399	1	1
rs932372	1	25627601	G	0.450594	2864	-0.0230771	-0.0251019	0.357919	0.366902	0.76271	1
chr1:25628247	1	25628247	A	0.0106494	2864	0.00632392	0.122149	0.95871	0.959475	1	1
chr1:25629447	1	25629447	A	0.450246	2844	-0.0280276	-0.0252471	0.266943	0.275914	0.649429	0.993017
chr1:25631006	1	25631006	A	0.447793	2854	-0.023314	-0.0251635	0.354185	0.36318	0.820398	0.996508
rs873308	1	25631242	G	0.449895	2864	-0.0248038	-0.0251255	0.323547	0.3326	0.678099	1
rs11802413	1	25633507	G	0.447626	2864	-0.024775	-0.0251609	0.32479	0.333842	0.623319	1
rs7541095	1	25633878	A	0.445531	2864	-0.0222327	-0.025131	0.376335	0.385249	0.762219	1
chr1:25634511	1	25634511	T	0.448324	2864	-0.0228533	-0.025154	0.363596	0.372561	0.623577	1
chr1:25635489	1	25635489	A	0.449546	2864	-0.0260802	-0.025112	0.299011	0.308061	0.73407	1
chr1:25640196	1	25640196	G	0.4478	2864	-0.023527	-0.025169	0.349912	0.35892	0.596912	1
rs10903129	1	25641524	A	0.4478	2864	-0.023527	-0.025169	0.349912	0.35892	0.596912	1
chr1:25641808	1	25641808	T	0.4478	2864	-0.023527	-0.025169	0.349912	0.35892	0.596912	1
chr1:25642269	1	25642269	C	0.0216707	2861	-0.00111844	-0.0851158	0.989516	0.98971	0.387295	0.998953
chr1:25642296	1	25642296	A	0.00122207	2864	-0.517695	-0.314379	0.099615	0.106054	0.00366364	1
chr1:25645613	1	25645613	A	0.001235	2834	-0.5181	-0.314743	0.0997429	0.106186	0.00370239	0.989525
chr1:25648269	1	25648269	T	0.44883	2863	-0.0257594	-0.0251164	0.30508	0.314136	0.733973	0.999651
rs12027135	1	25648320	T	0.447654	2856	-0.0230614	-0.0252038	0.360193	0.36917	0.649846	0.997207
chr1:25650693	1	25650693	G	0.449546	2864	-0.0260802	-0.025112	0.299011	0.308061	0.73407	1
chr1:25651554	1	25651554	A	0.443359	2816	-0.0283386	-0.0255511	0.267389	0.276361	0.320848	0.98324
chr1:25653480	1	25653480	G	0.445531	2864	-0.0222327	-0.025131	0.376335	0.385249	0.762219	1
chr1:25654342	1	25654342	G	0.0254297	2851	-0.0341558	-0.0803355	0.670717	0.676474	0.26156	0.995461
chr1:25656905	1	25656905	G	0.4478	2864	-0.023527	-0.025169	0.349912	0.35892	0.596912	1
chr1:25658038	1	25658038	G	0.4478	2864	-0.023527	-0.025169	0.349912	0.35892	0.596912	1
chr1:25658447	1	25658447	G	0.0218226	2864	-0.00760274	-0.0847881	0.928551	0.929873	0.394558	1
chr1:25658502	1	25658502	A	0.0112241	2851	0.193065	0.119172	0.105222	0.111833	1	0.995461
chr1:25660785	1	25660785	G	0.452347	2833	-0.025919	-0.0253731	0.307012	0.316069	0.343359	0.989176
chr1:25661012	1	25661012	A	0.449546	2864	-0.0260802	-0.025112	0.299011	0.308061	0.73407	1
chr1:25661875	1	25661875	A	0.4478	2864	-0.023527	-0.025169	0.349912	0.35892	0.596912	1
chr1:25662785	1	25662785	T	0.445493	2862	-0.0223246	-0.0251322	0.374388	0.383311	0.791129	0.999302
chr1:25667028	1	25667028	A	0.00123153	2842	-0.517587	-0.314764	0.1001	0.106554	0.00369198	0.992318
chr1:25667479	1	25667479	G	0.445531	2864	-0.0222327	-0.025131	0.376335	0.385249	0.762219	1
chr1:25670710	1	25670710	A	0.447277	2864	-0.0247825	-0.0250735	0.322961	0.332015	0.909734	1
chr1:25671638	1	25671638	A	0.0412011	2864	-0.162547	-0.0628213	0.00966878	0.0111019	1	1
chr1:25672270	1	25672270	A	0.445356	2864	-0.0222069	-0.0251415	0.377087	0.385999	0.733535	1
chr1:25672605	1	25672605	C	0.179112	2839	-0.0243059	-0.0330241	0.461728	0.470075	0.224975	0.991271
chr1:25673377	1	25673377	A	0.439595	2864	-0.0207186	-0.0251645	0.410322	0.419057	0.76159	1
chr1:25673996	1	25673996	A	0.445531	2864	-0.0222327	-0.025131	0.376335	0.385249	0.762219	1
chr1:25674643	1	25674643	G	0.447479	2856	-0.0256207	-0.025103	0.307433	0.31649	0.969818	0.997207
chr1:25675682	1	25675682	G	0.445512	2863	-0.0222595	-0.0251352	0.375838	0.384755	0.76226	0.999651
chr1:25675749	1	25675749	G	0.00122207	2864	-0.517695	-0.314379	0.099615	0.106054	0.00366364	1
chr1:25677689	1	25677689	A	0.00139665	2864	-0.460036	-0.29837	0.123114	0.130218	0.00488272	1
chr1:25679682	1	25679682	G	0.447277	2864	-0.0247825	-0.0250735	0.322961	0.332015	0.909734	1
chr1:25680062	1	25680062	A	0.0422634	2863	0.0654198	0.061373	0.286451	0.295482	0.352141	0.999651
chr1:25681535	1	25681535	G	0.447277	2864	-0.0247825	-0.0250735	0.322961	0.332015	0.909734	1
chr1:25681644	1	25681644	G	0.445531	2864	-0.0222327	-0.025131	0.376335	0.385249	0.762219	1
chr1:25683003	1	25683003	G	0.445531	2864	-0.0222327	-0.025131	0.376335	0.385249	0.762219	1
chr1:25684075	1	25684075	G	0.119064	2864	0.08711	0.0387733	0.0246625	0.027455	0.37255	1
chr1:25684133	1	25684133	A	0.425842	2852	-0.010146	-0.0252861	0.688237	0.693723	0.818375	0.99581
chr1:25684315	1	25684315	A	0.00122207	2864	-0.517695	-0.314379	0.099615	0.106054	0.00366364	1
chr1:25685446	1	25685446	G	0.445531	2864	-0.0222327	-0.025131	0.376335	0.385249	0.762219	1
chr1:25685651	1	25685651	A	0.00628492	2864	-0.358747	-0.157946	0.0231276	0.0258004	1	1
chr1:25689434	1	25689434	G	0.433834	2864	-0.0110032	-0.0251932	0.66229	0.668175	0.790027	1
chr1:25690769	1	25690769	G	0.015014	2864	0.0524804	0.10199	0.606857	0.613543	0.476798	1
chr1:25690985	1	25690985	A	0.444832	2864	-0.0243246	-0.0251018	0.332527	0.341571	0.85003	1
chr1:25694258	1	25694258	A	0.445531	2864	-0.0222327	-0.025131	0.376335	0.385249	0.762219	1
chr1:25698178	1	25698178	G	0.00122207	2864	-0.517695	-0.314379	0.099615	0.106054	0.00366364	1
chr1:25698543	1	25698543	G	0.44361	2864	-0.022864	-0.0250717	0.361797	0.370768	1	1
chr1:25699089	1	25699089	G	0.44361	2864	-0.022864	-0.0250717	0.361797	0.370768	1	1
chr1:25701317	1	25701317	A	0.0244413	2864	-0.0632126	-0.0793442	0.425632	0.434265	0.088187	1
chr1:25701666	1	25701666	A	0.00436453	2864	0.0067518	0.189315	0.97155	0.972077	1	1
chr1:25702575	1	25702575	A	0.444134	2864	-0.0236033	-0.0250921	0.346875	0.35589	0.909612	1
chr1:25702818	1	25702818	A	0.0193785	2864	-0.0249334	-0.0895657	0.780719	0.784685	0.288891	1
chr1:25712768	1	25712768	G	0.0172896	2863	-0.0125602	-0.0955052	0.895369	0.897298	0.577709	0.999651
chr1:25713361	1	25713361	A	0.436278	2864	-0.0333749	-0.0250175	0.182182	0.190424	0.704213	1
chr1:25713790	1	25713790	G	0.435094	2858	-0.034691	-0.0251012	0.166958	0.174967	0.819478	0.997905
chr1:25714218	1	25714218	A	0.436278	2864	-0.0333749	-0.0250175	0.182182	0.190424	0.704213	1
chr1:25717301	1	25717301	A	0.436802	2864	-0.0326938	-0.0250013	0.19098	0.199339	0.676184	1
chr1:25722438	1	25722438	G	0.436802	2864	-0.0327177	-0.0250017	0.190664	0.199019	0.676184	1
chr1:25722529	1	25722529	A	0.435405	2864	-0.0305644	-0.0250024	0.221534	0.230221	0.648412	1
chr1:25722793	1	25722793	G	0.437434	2821	-0.0333843	-0.0251662	0.184657	0.192932	0.70206	0.984986
chr1:25724564	1	25724564	G	0.439944	2864	0.0145226	0.0250908	0.562724	0.569989	1	1
chr1:25725015	1	25725015	G	0.00331704	2864	0.229994	0.216937	0.289058	0.298093	1	1
chr1:25725180	1	25725180	A	0.435405	2864	-0.0339525	-0.0250191	0.174761	0.182893	0.703965	1
chr1:25725807	1	25725807	G	0.436976	2864	-0.0319209	-0.0249911	0.2015	0.209986	0.64864	1
chr1:25727195	1	25727195	A	0.080007	2856	0.0219856	0.0465672	0.636837	0.643099	0.204154	0.997207
chr1:25727612	1	25727612	A	0.0192039	2864	0.0638169	0.0899224	0.477898	0.486098	0.281695	1
chr1:25727681	1	25727681	G	0.437325	2864	-0.0331153	-0.0249862	0.185058	0.193339	0.648655	1
chr1:25728023	1	25728023	C	0.4375	2864	-0.0332214	-0.0249754	0.183463	0.191722	0.621607	1
chr1:25729341	1	25729341	C	0.436627	2864	-0.0330083	-0.0250139	0.186969	0.195276	0.704174	1
chr1:25729797	1	25729797	G	0.0185056	2864	0.0390155	0.0914991	0.669814	0.675584	0.253556	1
chr1:25730670	1	25730670	A	0.435056	2864	-0.0314582	-0.0250091	0.20844	0.217001	0.648446	1
chr1:25731611	1	25731611	A	0.436278	2864	-0.0332944	-0.0250183	0.183253	0.19151	0.704213	1
chr1:25733103	1	25733103	A	0.436976	2864	-0.0300598	-0.024976	0.228764	0.237511	0.595006	1
chr1:25735766	1	25735766	G	0.438024	2864	-0.0314524	-0.0250133	0.208598	0.217161	0.732741	1
chr1:25736108	1	25736108	A	0.0349162	2864	-0.0192287	-0.067689	0.776354	0.780394	0.77726	1
chr1:25739380	1	25739380	A	0.47066	2863	-0.0224467	-0.0246929	0.363331	0.372297	0.276686	0.999651
chr1:25739882	1	25739882	A	0.0113478	2864	0.117453	0.116455	0.313182	0.32224	0.307379	1
chr1:25740702	1	25740702	A	0.0153631	2864	-0.00343426	-0.0997552	0.972537	0.973046	0.143084	1
chr1:25744217	1	25744217	G	0.0389316	2864	-0.0868337	-0.0641592	0.175925	0.184075	0.619469	1
chr1:25744743	1	25744743	C	0.039632	2826	-0.0903754	-0.0639789	0.157778	0.165628	0.801838	0.986732
chr1:25745054	1	25745054	G	0.0562151	2864	-0.0769835	-0.0533834	0.149278	0.156967	0.158269	1
chr1:25746651	1	25746651	G	0.054993	2864	-0.0649066	-0.0542291	0.231347	0.240114	0.368025	1
chr1:25747263	1	25747263	G	0.0371987	2863	-0.0819925	-0.0661055	0.214854	0.22348	0.797092	0.999651
chr1:25747275	1	25747275	A	0.0544693	2864	-0.0634204	-0.0546195	0.245589	0.254453	0.583544	1
chr1:25747713	1	25747713	G	0.0553199	2829	-0.0601524	-0.0543936	0.268782	0.27776	0.367686	0.987779
chr1:25748237	1	25748237	A	0.0544693	2864	-0.0679526	-0.054618	0.213447	0.222059	0.583544	1
chr1:25748507	1	25748507	G	0.0544693	2864	-0.0634204	-0.0546195	0.245589	0.254453	0.583544	1
chr1:25748756	1	25748756	C	0.0544693	2864	-0.0679197	-0.0544347	0.21213	0.220729	0.360945	1
chr1:25748832	1	25748832	C	0.0539455	2864	-0.0681463	-0.0546446	0.212367	0.220968	0.355454	1
chr1:25748927	1	25748927	A	0.0370112	2864	-0.0826001	-0.0662517	0.212485	0.221087	1	1
chr1:25748996	1	25748996	G	0.0167598	2864	-0.0274924	-0.0958212	0.774179	0.778256	0.188542	1
chr1:25749050	1	25749050	G	0.0371858	2864	-0.0866608	-0.0661123	0.189921	0.198267	0.797097	1
chr1:25749904	1	25749904	A	0.0370112	2864	-0.0826001	-0.0662517	0.212485	0.221087	1	1
chr1:25750079	1	25750079	A	0.0289804	2864	-0.0880569	-0.0749281	0.239907	0.248736	0.732388	1
chr1:25750160	1	25750160	A	0.100035	2864	0.0951977	0.0416811	0.0223744	0.0249873	0.67773	1
chr1:25750534	1	25750534	A	0.0542947	2864	-0.0655395	-0.0546887	0.230757	0.23952	0.582166	1
chr1:25750867	1	25750867	G	0.0544693	2864	-0.0679197	-0.0544347	0.21213	0.220729	0.360945	1
chr1:25750886	1	25750886	G	0.054833	2845	-0.0725625	-0.054681	0.184504	0.192777	0.585056	0.993366
chr1:25751115	1	25751115	A	0.0172896	2863	-0.0275379	-0.0944927	0.770723	0.774859	0.207269	0.999651
chr1:25751319	1	25751319	G	0.0542947	2864	-0.0655395	-0.0546887	0.230757	0.23952	0.582166	1
chr1:25751566	1	25751566	C	0.0370112	2864	-0.0826001	-0.0662517	0.212485	0.221087	1	1
chr1:25752174	1	25752174	G	0.0542947	2864	-0.0630853	-0.0546896	0.248698	0.257581	0.582166	1
chr1:25752243	1	25752243	A	0.0373603	2864	-0.0782237	-0.0659794	0.235789	0.244589	0.797052	1
chr1:25752481	1	25752481	G	0.0181564	2864	0.113511	0.0923041	0.21879	0.227452	0.239907	1
chr1:25752503	1	25752503	A	0.0329958	2864	0.0212509	0.0693925	0.75942	0.763747	0.550963	1
chr1:25754387	1	25754387	A	0.0153631	2864	0.035451	0.0997546	0.722303	0.727245	0.143084	1
chr1:25756367	1	25756367	A	0.0157123	2864	0.0279812	0.0987313	0.776865	0.780896	0.15385	1
chr1:25756429	1	25756429	A	0.012919	2864	0.0215403	0.109476	0.844017	0.846874	0.379783	1
chr1:25756721	1	25756721	C	0.0132682	2864	-0.0319611	-0.1081	0.767487	0.771678	0.396021	1
chr1:25757079	1	25757079	G	0.473813	2864	-0.0112402	-0.024661	0.648541	0.654631	0.230559	1
chr1:25757084	1	25757084	A	0.467703	2864	-0.0076405	-0.0245867	0.755985	0.76037	0.10667	1
chr1:25758179	1	25758179	A	0.489525	2864	-0.00900912	-0.0247552	0.715911	0.720957	0.52505	1
chr1:25759640	1	25759640	A	0.00331704	2864	0.281614	0.216855	0.194072	0.20247	1	1
chr1:25759817	1	25759817	A	0.00872905	2864	-0.0279817	-0.134447	0.835132	0.838146	1	1
chr1:25760112	1	25760112	G	0.496334	2864	0.0142502	0.024843	0.566231	0.573452	0.793701	1
chr1:25760694	1	25760694	A	0.0185056	2864	-0.124415	-0.0890054	0.162163	0.17009	0.00251571	1
chr1:25761220	1	25761220	T	0.0206078	2863	0.0570125	0.0863379	0.509035	0.516923	0.1181	0.999651
chr1:25762219	1	25762219	A	0.48044	2863	0.0120232	0.024979	0.630281	0.636638	0.851545	0.999651
chr1:25762776	1	25762776	A	0.473289	2864	0.0169143	0.0248934	0.496841	0.504856	0.851415	1
chr1:25763861	1	25763861	A	0.0027933	2864	0.494258	0.236259	0.0364371	0.040051	1	1
chr1:25764546	1	25764546	A	0.476955	2864	0.0134792	0.0250075	0.589883	0.596798	0.764467	1
chr1:25764567	1	25764567	A	0.0151885	2864	-0.0802024	-0.101455	0.429222	0.437829	0.484773	1
rs3924486	1	25765467	C	0.498429	2864	0.0177243	0.0249431	0.477339	0.485545	0.881166	1
chr1:25767864	1	25767864	A	0.0373603	2864	0.17448	0.0646423	0.00695133	0.00807029	0.116589	1
chr1:25767993	1	25767993	A	0.477654	2864	0.012884	0.025021	0.606605	0.613294	0.70807	1
rs3924234	1	25768186	A	0.499476	2864	-0.0164019	-0.0249074	0.510206	0.518081	1	1
chr1:25768797	1	25768797	A	0.274363	2863	0.00392173	0.0278956	0.888197	0.890257	0.962575	0.999651
chr1:25770218	1	25770218	G	0.0206222	2861	0.0560135	0.0863574	0.516581	0.524388	0.118282	0.998953
chr1:25771752	1	25771752	C	0.489525	2864	0.0101925	0.0249993	0.683484	0.689044	0.70855	1
chr1:25772802	1	25772802	G	0.385435	2863	0.020684	0.0254996	0.417281	0.42597	0.722565	0.999651
chr1:25772827	1	25772827	A	0.186103	2864	-0.0395104	-0.0319948	0.216868	0.225512	1	1
chr1:25773301	1	25773301	A	0.00226955	2864	-0.427602	-0.261882	0.102509	0.109038	1	1
chr1:25773513	1	25773513	A	0.0115223	2864	-0.081892	-0.117342	0.485244	0.493374	1	1
chr1:25775955	1	25775955	G	0.184247	2863	0.0806503	0.0322449	0.0123781	0.0140964	0.75583	0.999651
chr1:25776042	1	25776042	A	0.0153631	2864	0.0354261	0.0986157	0.71942	0.724409	0.0280813	1
chr1:25776816	1	25776816	G	0.00122207	2864	0.26813	0.356562	0.452058	0.460488	1	1
chr1:25776978	1	25776978	G	0.0747207	2864	-0.10085	-0.0464923	0.0300696	0.0332586	0.0767746	1
chr1:25777369	1	25777369	G	0.170915	2864	0.0695847	0.0327828	0.0337876	0.0372296	0.323177	1
chr1:25779463	1	25779463	A	0.183263	2862	0.0780738	0.0323628	0.0158455	0.0178981	0.66197	0.999302
chr1:25780627	1	25780627	A	0.00471863	2861	-0.179873	-0.182007	0.323017	0.332071	1	0.998953
chr1:25780782	1	25780782	A	0.160789	2864	0.0768708	0.0338532	0.0231644	0.0258402	0.889871	1
chr1:25780828	1	25780828	A	0.178484	2863	0.0783096	0.0327701	0.0168639	0.0190093	0.483078	0.999651
rs6685587	1	25879462	A	0.0621716	2855	-0.0445969	-0.0521191	0.392179	0.401018	0.4214	0.996858
rs2786875	1	25933853	A	0.0577863	2864	-0.0367714	-0.0534493	0.491472	0.499541	1	1
rs807067	1	26069650	G	0.484811	2864	-0.0159446	-0.0247056	0.518678	0.526462	0.349669	1
rs4659397	1	26130113	A	0.185405	2864	-0.0112555	-0.0322792	0.72732	0.73218	0.457964	1
rs10902707	1	26139284	A	0.242842	2864	-0.0250158	-0.0288697	0.386213	0.395082	0.542016	1
rs1469512	1	26181780	A	0.338338	2864	-0.0300886	-0.0259637	0.246509	0.255379	0.155896	1
rs933078	1	26196695	C	0.331878	2864	-0.0355059	-0.0262385	0.175991	0.184143	0.423465	1
rs2275947	1	26256462	G	0.232367	2864	-0.0398481	-0.0293161	0.174066	0.182188	0.564799	1
rs2997447	1	26260010	A	0.21708	2863	-0.0265166	-0.0298957	0.375093	0.384013	0.322297	0.999651
rs2783711	1	26301451	A	0.1875	2864	-0.0430801	-0.0317351	0.174625	0.182756	0.581374	1
rs17257093	1	26308818	A	0.186802	2864	-0.0429599	-0.0317895	0.176572	0.184731	0.62265	1
rs2783637	1	26311813	A	0.187151	2864	-0.0456462	-0.031742	0.150423	0.158135	0.580302	1
rs10794523	1	26365758	G	0.475375	2863	0.0318209	0.0248768	0.200847	0.209326	0.822176	0.999651
rs11247867	1	26390478	A	0.185754	2864	-0.0267957	-0.031842	0.400058	0.408853	0.53661	1
rs6699798	1	26429029	A	0.181104	2863	0.0436688	0.0319814	0.172113	0.180205	0.256588	0.999651
rs4072445	1	26536806	G	0.300105	2864	-0.0146604	-0.0274745	0.593618	0.600483	0.266118	1
rs12137896	1	26585184	A	0.167482	2863	0.0112746	0.033192	0.7341	0.738849	0.63881	0.999651
rs9438620	1	26588723	A	0.311802	2864	-0.00877161	-0.0267604	0.743076	0.747676	0.632034	1
rs11247954	1	26613872	A	0.0769902	2864	0.0425715	0.0466916	0.361896	0.370867	1	1
rs7532866	1	26614131	G	0.340957	2864	0.0572317	0.0265748	0.031271	0.0345433	0.1974	1
rs2229714	1	26773295	A	0.148568	2864	-0.00764804	-0.0348696	0.826391	0.829561	0.658054	1
rs7726	1	26773906	A	0.262744	2864	0.00723769	0.028491	0.799469	0.803111	0.469772	1
rs6668958	1	26774975	C	0.213836	2862	-0.00609312	-0.0304095	0.841192	0.844099	0.955693	0.999302
rs4970503	1	26779173	G	0.306215	2864	0.00757007	0.0275042	0.783137	0.78706	0.064649	1
rs566421	1	26782253	A	0.39176	2864	-0.0030418	-0.0253383	0.904446	0.906209	0.410491	1
rs12746810	1	26885720	A	0.101118	2863	0.0373949	0.0410971	0.362867	0.371835	0.538276	0.999651
rs12726287	1	26911815	A	0.0977995	2863	0.0292413	0.0415546	0.48163	0.489796	0.339445	0.999651
rs12735646	1	26950953	A	0.0977654	2864	0.0317035	0.0415577	0.445534	0.454017	0.339356	1
rs12748152	1	27010980	A	0.0976249	2863	0.0291875	0.0415814	0.482718	0.490873	0.338534	0.999651
rs7527776	1	27036922	A	0.394029	2864	-0.0291984	-0.0254942	0.252088	0.26099	0.968807	1
rs737524	1	27053416	C	0.419839	2863	0.0223894	0.0250075	0.370623	0.379562	0.35714	0.999651
rs17162330	1	27108799	G	0.169693	2864	0.0269917	0.033381	0.418748	0.427427	0.595881	1
rs12742376	1	27157782	A	0.0983234	2863	0.0224954	0.0415789	0.588487	0.595421	0.46099	0.999651
rs12751742	1	27163095	G	0.0980392	2856	0.0185358	0.0415957	0.655873	0.661854	0.340125	0.997207
rs870665	1	27172732	A	0.00855447	2864	0.0993813	0.135897	0.464597	0.47292	1	1
rs12410656	1	27270191	A	0.0862731	2863	0.0104201	0.0448816	0.816407	0.819752	0.236348	0.999651
rs7530701	1	27448495	A	0.286762	2863	0.00554777	0.027603	0.840711	0.843626	0.855017	0.999651
rs17262181	1	27458775	A	0.0975908	2864	0.0576533	0.0423943	0.173852	0.181971	0.289874	1
rs12566737	1	27477448	A	0.00925279	2864	0.0358008	0.130638	0.784049	0.787957	1	1
rs12727507	1	27563231	G	0.341468	2848	0.0127842	0.0265144	0.629691	0.636056	0.478717	0.994413
rs9438514	1	27625328	C	0.0977654	2864	-0.00506463	-0.0418684	0.903718	0.905495	0.915491	1
rs6678647	1	27967090	C	0.0638558	2858	0.169544	0.0511216	0.000911607	0.00113402	0.753814	0.997905
rs11247703	1	28076240	C	0.286064	2863	0.00274667	0.027685	0.92097	0.922431	0.647457	0.999651
rs4357550	1	28164363	A	0.0106681	2859	-0.0594973	-0.121924	0.625558	0.631982	1	0.998254
rs6699701	1	28171538	A	0.308659	2864	0.00221236	0.0273416	0.935509	0.936703	0.148516	1
rs12144891	1	28217567	G	0.287011	2864	-0.00644214	-0.0278626	0.817151	0.820483	0.217667	1
rs558189	1	28405612	G	0.0253319	2862	-0.0456336	-0.0786178	0.561612	0.568892	0.428448	0.999302
rs580800	1	28457800	G	0.316341	2864	-0.0239645	-0.0265992	0.367616	0.376566	0.46297	1
rs508772	1	28462165	A	0.485145	2861	0.0235533	0.0244287	0.334963	0.344003	0.0329079	0.998953
rs512493	1	28509166	G	0.256639	2862	-0.012457	-0.0288728	0.666145	0.671971	0.239605	0.999302
rs17163135	1	28521480	A	0.182739	2862	-0.0484063	-0.0324361	0.135605	0.143007	0.531363	0.999302
rs11587757	1	28613008	G	0.321753	2864	0.0240963	0.0264549	0.362377	0.371346	0.416098	1
rs9426420	1	28766159	A	0.0925279	2864	-0.0409912	-0.0433661	0.344539	0.353559	0.372926	1
rs6673481	1	28862857	C	0.289032	2863	0.0217083	0.0274219	0.428571	0.437183	0.855787	0.999651
rs11578325	1	28917710	G	0.434008	2864	-0.00146569	-0.0247623	0.9528	0.953675	0.118977	1
rs3753693	1	28933485	A	0.422486	2864	-0.0100833	-0.0249795	0.686461	0.691974	0.338379	1
rs1338064	1	28995934	G	0.127314	2863	0.00339103	0.0373257	0.927612	0.928951	0.932915	0.999651
rs204047	1	29017711	A	0.175628	2864	-0.0455074	-0.0325693	0.162339	0.17027	0.651347	1
rs12749204	1	29048800	G	0.186103	2864	-0.0515028	-0.0319835	0.107334	0.114008	1	1
rs1485471	1	29067488	A	0.376746	2864	-0.0513392	-0.0258819	0.0473009	0.0515572	0.426134	1
rs203278	1	29114784	G	0.315403	2863	0.0391125	0.0273672	0.152954	0.160715	0.0272781	0.999651
rs578800	1	29309693	A	0.0656425	2864	0.0406502	0.0507568	0.423199	0.431849	0.362672	1
rs575710	1	29319242	G	0.0659916	2864	0.0427262	0.0506472	0.398891	0.407693	0.362709	1
rs547976	1	29375801	A	0.255412	2864	0.029954	0.0283904	0.29139	0.30043	0.555467	1
rs3103882	1	29390880	A	0.123603	2864	0.036588	0.0381937	0.338084	0.347118	0.343848	1
rs1032425	1	29448192	A	0.146175	2863	0.029688	0.0351063	0.397743	0.406551	0.653555	0.999651
rs2235938	1	29505187	A	0.386832	2863	-0.0163087	-0.0258344	0.527858	0.535539	0.269997	0.999651
rs12749276	1	29521776	A	0.0726257	2864	0.0539937	0.0477342	0.257999	0.266931	0.578242	1
rs4654312	1	29651568	G	0.418645	2864	-0.00138007	-0.0258112	0.957359	0.958149	0.0234953	1
rs7514218	1	29653344	A	0.22905	2864	0.02276	0.030051	0.448822	0.457278	0.138598	1
rs4654354	1	29666834	A	0.154853	2864	0.00959749	0.0348787	0.783188	0.78711	0.175513	1
rs12097066	1	29740594	C	0.112081	2864	-0.0168166	-0.0392718	0.668498	0.674289	0.572843	1
rs11582200	1	29914467	A	0.155726	2864	0.0180646	0.0339973	0.595174	0.602019	0.286309	1
rs4949492	1	29943069	A	0.105098	2864	-0.0120117	-0.0407264	0.768042	0.772223	0.842427	1
rs4949477	1	30050255	G	0.460545	2864	0.00252316	0.0248115	0.919	0.920497	0.475015	1
rs12120617	1	30090504	G	0.185405	2864	-0.011467	-0.0322112	0.721845	0.726795	0.710621	1
rs12039019	1	30127437	C	0.214909	2864	-0.00312432	-0.0300607	0.917222	0.918752	0.292579	1
rs10798942	1	30211325	G	0.275061	2863	0.00152003	0.0277196	0.956269	0.957079	0.482369	0.999651
rs17263039	1	30217566	G	0.115398	2864	0.00344801	0.0383944	0.928442	0.929766	0.118807	1
rs4949538	1	30275431	A	0.0686103	2864	-0.0067619	-0.048938	0.890104	0.892129	0.462862	1
rs746758	1	30309298	A	0.496858	2864	0.0358707	0.0246435	0.145507	0.15312	0.262376	1
rs267674	1	30323569	G	0.199546	2864	0.0224387	0.0308625	0.467193	0.475492	0.292565	1
rs12049424	1	30427799	A	0.0850209	2864	0.0102007	0.0438844	0.816192	0.819541	0.0536003	1
rs7516871	1	30459963	A	0.214909	2864	-0.0659419	-0.0307082	0.0317637	0.0350698	0.18401	1
rs1998012	1	30496077	G	0.0373603	2864	0.0208901	0.0653846	0.74935	0.753847	0.596895	1
rs10915079	1	30564112	A	0.312849	2864	-0.044437	-0.0269641	0.0993515	0.105782	0.66397	1
rs437628	1	30583529	A	0.104749	2864	0.0194091	0.0410747	0.636547	0.642813	0.319118	1
rs10489163	1	30665013	G	0.250698	2864	-0.0550365	-0.0283752	0.0524283	0.056958	0.196082	1
rs1385325	1	30669488	G	0.462989	2864	-0.0349186	-0.0246706	0.156954	0.164789	0.20144	1
rs10915113	1	30671442	G	0.226781	2864	-0.0566697	-0.0296731	0.0561584	0.0608767	0.872982	1
rs10158360	1	30716613	A	0.45007	2864	0.0224866	0.0249712	0.367855	0.376804	0.850287	1
rs1484850	1	30760952	A	0.0840615	2861	-0.00598564	-0.0451354	0.894498	0.896443	0.715126	0.998953
rs394402	1	30764370	A	0.232193	2864	-0.0446008	-0.0295432	0.131126	0.138425	0.834024	1
rs6692098	1	30770683	C	0.222242	2864	-0.0198661	-0.0297292	0.503984	0.511925	0.41752	1
rs10914150	1	30848986	A	0.410789	2864	-0.00964711	-0.0254245	0.70436	0.709591	0.643309	1
rs11589302	1	30872088	A	0.315293	2864	-0.0171173	-0.0270118	0.526279	0.533977	0.411213	1
rs1323845	1	30886847	A	0.182837	2855	-0.0163919	-0.0326121	0.615224	0.621793	0.316289	0.996858
rs1212652	1	30915622	G	0.455656	2864	-0.0599618	-0.024655	0.0150141	0.0169893	0.175034	1
rs12750278	1	30951250	C	0.114525	2864	0.0331977	0.0390748	0.395551	0.404371	0.926562	1
rs4949302	1	31033624	G	0.496334	2864	0.0227417	0.0249088	0.361243	0.370216	1	1
rs10798810	1	31049149	G	0.4478	2864	-0.0407666	-0.0253219	0.107412	0.114088	0.257095	1
rs12117057	1	31074773	A	0.132553	2863	0.0725037	0.0365056	0.0470226	0.0512635	0.569061	0.999651
rs6680621	1	31099553	A	0.330482	2864	-0.0320996	-0.0265264	0.226239	0.234966	0.832853	1
rs1473	1	31185506	A	0.0819071	2863	0.0494151	0.0453127	0.275477	0.284478	0.803792	0.999651
rs4949327	1	31189891	A	0.354574	2864	0.0129781	0.0258951	0.616245	0.6228	0.567814	1
rs12404568	1	31249417	A	0.0744235	2862	-0.00483945	-0.0474305	0.918731	0.920233	0.892508	0.999302
rs1890020	1	31339425	A	0.44986	2862	-0.0123533	-0.024818	0.618656	0.625177	0.345075	0.999302
rs12033303	1	31459125	A	0.260649	2864	0.0404514	0.0284693	0.155351	0.163157	0.771123	1
rs12409835	1	31461129	A	0.0354399	2864	-0.005177	-0.0672197	0.938611	0.939747	0.781079	1
rs2292165	1	31505479	A	0.180342	2864	-0.0519149	-0.0321553	0.106419	0.113066	0.448552	1
rs6659255	1	31642256	A	0.14176	2864	-0.0517827	-0.0353052	0.142453	0.150004	0.24949	1
rs7546536	1	31693764	A	0.304818	2864	0.00636828	0.026945	0.813166	0.816568	0.659477	1
rs10914435	1	31775314	A	0.0309008	2864	-0.0901142	-0.0714035	0.206934	0.215479	0.348586	1
rs10914436	1	31775381	A	0.0309008	2864	-0.0901142	-0.0714035	0.206934	0.215479	0.348586	1
rs2271928	1	31900540	A	0.404679	2864	-0.00637498	-0.0251342	0.799775	0.803411	0.313477	1
rs2050256	1	31977270	G	0.188722	2864	-0.0266698	-0.0317233	0.400516	0.409309	0.714289	1
rs624017	1	32209855	G	0.169577	2863	-0.0824445	-0.0329993	0.0124766	0.0142048	0.642135	0.999651
rs7541800	1	32228602	A	0.0268855	2864	0.0295574	0.0770318	0.701198	0.706479	1	1
rs2496	1	32613780	G	0.0417249	2864	-0.0130239	-0.0617402	0.832929	0.835983	0.343127	1
rs10914571	1	32751825	A	0.0726511	2863	0.0615862	0.0490177	0.208969	0.217535	0.0251234	0.999651
rs11588497	1	32803048	G	0.223891	2863	-0.0287916	-0.0296254	0.331123	0.340168	0.360728	0.999651
rs601637	1	32923538	A	0.036662	2864	0.0402735	0.0652724	0.537231	0.544804	0.104904	1
rs685235	1	33400928	A	0.26669	2861	0.0183024	0.0277792	0.50999	0.517867	0.138497	0.998953
rs591664	1	33401828	A	0.00611034	2864	0.069491	0.160271	0.664589	0.670439	1	1
rs10493052	1	33718272	A	0.164513	2863	-0.0167006	-0.0332863	0.615861	0.622421	0.30779	0.999651
rs7532550	1	33760423	A	0.0950791	2845	-0.0106501	-0.0430529	0.80462	0.808172	0.382256	0.993366
rs923882	1	33801657	A	0.283694	2864	-0.0428721	-0.0270787	0.113366	0.120212	0.0307621	1
rs729176	1	33815147	A	0.203529	2862	-0.0638435	-0.0309983	0.0394388	0.0432398	0.817608	0.999302
rs11580917	1	33823937	G	0.336767	2864	-0.0391609	-0.0258671	0.130044	0.137317	0.0542992	1
rs16835654	1	33831498	G	0.0621508	2864	0.0224734	0.0511175	0.660196	0.666112	0.334521	1
rs625757	1	33922472	G	0.0934008	2864	-0.0751281	-0.0425892	0.0777294	0.0833976	0.658392	1
rs649214	1	33923138	G	0.405203	2864	0.0169297	0.0253626	0.504448	0.512385	1	1
rs2480244	1	33925781	G	0.0918296	2864	-0.0672547	-0.0429309	0.117213	0.124164	0.654036	1
rs10914773	1	33987647	G	0.226082	2864	-0.00742731	-0.0299249	0.803981	0.807544	0.593508	1
rs490109	1	33994397	A	0.210094	2863	-0.0177339	-0.0310503	0.567908	0.575108	0.114778	0.999651
rs12737807	1	34037971	C	0.49581	2864	0.00309711	0.0245169	0.899474	0.901329	0.0729191	1
rs12047802	1	34053012	A	0.140712	2864	-0.034749	-0.0358592	0.332525	0.341569	1	1
rs1358821	1	34091040	A	0.490395	2863	-0.0117106	-0.0248493	0.637453	0.643706	0.736564	0.999651
rs7528354	1	34138998	G	0.420042	2864	0.00121304	0.0252845	0.961736	0.962445	0.878105	1
rs560563	1	34217081	A	0.0494064	2864	-0.0209387	-0.0572327	0.714476	0.719545	0.688016	1
rs10914850	1	34268681	G	0.0626965	2863	0.0777255	0.051767	0.133239	0.140587	0.631696	0.999651
rs7541388	1	34295000	A	0.0277584	2864	-0.127129	-0.0768976	0.0982859	0.104683	0.171125	1
rs1842094	1	34379251	A	0.124127	2864	0.0385237	0.0371938	0.300316	0.309368	0.101752	1
rs771147	1	34382325	A	0.121334	2864	0.0186743	0.0373326	0.616925	0.62347	0.0177707	1
rs10914879	1	34392797	G	0.324372	2864	0.0504864	0.0265934	0.0576362	0.0624271	1	1
rs297780	1	34421716	A	0.0260126	2864	0.096916	0.0787084	0.218199	0.226856	1	1
rs7535080	1	34426952	A	0.034567	2864	0.0507883	0.0683097	0.457178	0.465565	1	1
rs719769	1	34452906	A	0.233066	2864	-0.0284873	-0.0291205	0.327947	0.336997	0.229538	1
rs10799030	1	34458328	A	0.246683	2864	-0.0287835	-0.0285651	0.313625	0.322683	0.247418	1
rs7512138	1	34499546	G	0.285615	2864	-0.0241419	-0.0277748	0.384737	0.393613	0.463713	1
rs11588801	1	34534498	A	0.314595	2864	0.00684948	0.0271968	0.801158	0.80477	0.140648	1
rs6661959	1	34812958	A	0.487256	2864	-0.0455489	-0.0249745	0.0681803	0.073455	0.793499	1
rs728448	1	34830688	A	0.132856	2864	0.0245164	0.0364524	0.501227	0.509197	0.465427	1
rs12059222	1	34864993	C	0.346892	2864	0.015734	0.026229	0.548593	0.556032	0.86897	1
rs12132123	1	34868239	A	0.167598	2864	0.0392499	0.0334324	0.240392	0.249224	0.788908	1
rs4652852	1	34886876	G	0.330831	2864	0.0456008	0.0266787	0.0874032	0.0934326	0.398641	1
rs4653072	1	34889206	A	0.210168	2862	0.0238286	0.0304905	0.434503	0.443071	0.778299	0.999302
rs509788	1	34890922	A	0.426501	2864	-0.0100237	-0.0249277	0.687603	0.693098	0.284952	1
rs10915019	1	34928653	G	0.337989	2864	0.016976	0.0261244	0.515813	0.523628	0.427517	1
rs4320749	1	34934389	A	0.451292	2864	0.0257246	0.0248371	0.300328	0.30938	0.428171	1
rs12119977	1	34934459	A	0.267458	2864	0.00968348	0.0279756	0.729237	0.734066	0.567156	1
rs10489658	1	34958432	G	0.439595	2864	0.00686545	0.025243	0.785642	0.789522	0.543989	1
rs1570099	1	35071891	C	0.312151	2864	0.00109631	0.026826	0.967401	0.968006	0.861887	1
rs2064895	1	35077870	A	0.215957	2864	0.0300117	0.0299347	0.316068	0.325126	0.246797	1
rs11263841	1	35081896	A	0.0717528	2864	-0.00959775	-0.048087	0.8418	0.844696	0.674215	1
rs4653107	1	35095090	A	0.12081	2864	0.0173073	0.0381241	0.649848	0.655919	0.792324	1
rs4653109	1	35100832	G	0.353177	2864	0.0286893	0.0258524	0.267114	0.276086	0.437083	1
rs4652867	1	35139877	A	0.276711	2864	0.0199364	0.0277372	0.472289	0.480542	0.74382	1
rs10493064	1	35141601	A	0.154853	2864	-0.0190313	-0.0342157	0.578064	0.585135	0.520968	1
rs7552714	1	35351379	A	0.00104749	2864	-0.303873	-0.385082	0.430046	0.438647	1	1
rs6702141	1	35425528	G	0.00680866	2864	0.0587948	0.151952	0.698807	0.704127	1	1
rs7543044	1	35446898	G	0.0755936	2864	-0.028941	-0.0475026	0.542359	0.549872	0.423927	1
rs522821	1	35514250	A	0.0467877	2864	0.086365	0.0583248	0.138671	0.14614	0.288217	1
rs12068951	1	35691196	G	0.0232274	2863	0.0137592	0.0830696	0.868445	0.870863	1	0.999651
rs11264164	1	35739501	G	0.0317737	2864	0.055452	0.0713614	0.437124	0.445673	1	1
rs715998	1	35937213	G	0.0235684	2864	0.0224947	0.0818434	0.783431	0.78735	0.671247	1
rs636832	1	36136062	A	0.0768156	2864	-0.0332753	-0.0470913	0.479807	0.48799	0.511367	1
rs522468	1	36426264	A	0.292423	2864	0.00115062	0.0274406	0.966554	0.967173	0.89227	1
rs272822	1	36450172	A	0.0338687	2864	-0.045673	-0.0692951	0.509826	0.517706	0.771585	1
rs11263875	1	36593514	A	0.100733	2864	-0.0105622	-0.0420418	0.801636	0.805239	0.120608	1
rs6692334	1	36600587	G	0.315642	2864	0.0268636	0.0267473	0.315211	0.324269	0.896761	1
rs16822826	1	36647993	A	0.150541	2863	0.0177636	0.0347206	0.608921	0.615578	0.769938	0.999651
rs2236565	1	36660289	G	0.372207	2864	-0.0291644	-0.0254055	0.250986	0.259882	0.149995	1
rs3917950	1	36714338	G	0.211243	2864	-0.039429	-0.0309105	0.202101	0.210594	0.161033	1
rs6667860	1	36730800	G	0.476082	2864	-0.00680306	-0.0248454	0.784227	0.788132	0.736013	1
rs2144370	1	36791306	A	0.323786	2863	0.00472172	0.0268439	0.860376	0.862939	0.370047	0.999651
rs4026414	1	36794897	A	0.452514	2864	0.0116392	0.0250479	0.642164	0.648348	0.939879	1
rs16823188	1	36796378	G	0.173769	2863	-0.0414317	-0.0332044	0.212114	0.220712	0.297654	0.999651
rs12567252	1	36813944	C	0.102689	2863	-0.0137912	-0.0410548	0.73693	0.741632	1	0.999651
rs12072274	1	36848080	G	0.107367	2864	0.0157031	0.0396488	0.692064	0.69749	0.118909	1
rs34305923	1	36916727	A	0.160964	2864	0.0857566	0.0340291	0.0117322	0.0133847	0.628033	1
rs12022019	1	36942821	A	0.0956704	2864	-0.0305137	-0.0427799	0.475677	0.483899	0.329851	1
rs12063010	1	36950998	A	0.0916084	2860	-0.0197763	-0.0435622	0.649844	0.655915	0.431469	0.998603
rs7537583	1	36976593	A	0.0703561	2864	0.00139998	0.0486124	0.977025	0.977451	0.774905	1
rs499230	1	37060524	A	0.173534	2864	0.0292156	0.0333027	0.380337	0.389234	0.192913	1
rs4653233	1	37171023	A	0.14368	2864	-0.0122664	-0.0354177	0.729091	0.733922	0.761425	1
rs4653235	1	37198462	A	0.310532	2858	-0.0120583	-0.0267442	0.652079	0.658116	0.406818	0.997905
rs3753771	1	37208062	G	0.259169	2863	-0.0522284	-0.0281764	0.0637929	0.0688731	0.407953	0.999651
rs12138633	1	37250650	A	0.25838	2864	-0.0132938	-0.0284298	0.64007	0.646285	0.922394	1
rs822854	1	37258375	G	0.472232	2863	-0.0281258	-0.0247746	0.256263	0.265186	0.476331	0.999651
rs12135742	1	37305358	A	0.12727	2864	0.00842017	0.0373787	0.821772	0.825023	1	1
rs218424	1	37307260	A	0.43523	2864	0.00234613	0.0252303	0.925913	0.927283	0.648298	1
rs215773	1	37368827	A	0.424057	2864	0.0115477	0.0250741	0.645128	0.651268	0.592397	1
rs12131641	1	37384100	A	0.22686	2863	0.00909372	0.0299873	0.761697	0.765986	0.39417	0.999651
rs1501540	1	37495665	A	0.377227	2863	-0.0262998	-0.0255429	0.303183	0.312237	0.550795	0.999651
rs7516603	1	37545637	G	0.328038	2864	0.00198088	0.0263373	0.940046	0.941156	0.471138	1
rs4653279	1	37580444	A	0.294867	2864	-0.0132202	-0.0271915	0.626834	0.633239	0.653285	1
rs2745480	1	37639230	G	0.16655	2864	-0.0259994	-0.0327908	0.427845	0.436462	0.0370162	1
rs2282256	1	37693270	G	0.0179818	2864	-0.0933492	-0.0945733	0.323615	0.332669	1	1
rs11577094	1	37799187	A	0.094132	2863	0.0728032	0.0425426	0.0870258	0.0930418	0.912562	0.999651
rs11583122	1	37826045	A	0.0945804	2860	0.0761247	0.0425074	0.0733162	0.0788073	0.91298	0.998603
rs12742985	1	37889311	A	0.383165	2863	0.00972799	0.0258021	0.706156	0.711358	0.476764	0.999651
rs571153	1	37949631	G	0.468904	2846	0.0142012	0.0252663	0.574074	0.581196	0.386852	0.993715
rs12124242	1	37958401	A	0.185819	2863	0.0331707	0.0317221	0.295715	0.304762	0.322846	0.999651
rs6671088	1	37958776	A	0.185754	2864	0.0328573	0.0317134	0.300169	0.30922	0.322767	1
rs11264092	1	37963212	G	0.289262	2859	0.0412899	0.0273785	0.131525	0.138833	0.682242	0.998254
rs605359	1	38000803	A	0.146124	2864	-0.00245965	-0.0350666	0.944081	0.945116	0.549452	1
rs12563037	1	38031231	C	0.30248	2863	-0.00854705	-0.0269937	0.751523	0.755983	0.595149	0.999651
rs12739026	1	38174520	C	0.129714	2864	0.0448916	0.0363971	0.217432	0.226081	0.056485	1
rs17465826	1	38196108	C	0.0247905	2864	-0.0797634	-0.0773017	0.302145	0.311199	0.00153876	1
rs4072980	1	38228693	A	0.40482	2863	0.0226551	0.0249274	0.363432	0.372398	0.0478885	0.999651
rs11211085	1	38239284	A	0.333101	2864	-0.0153336	-0.0266452	0.56497	0.572208	0.42441	1
rs7513555	1	38245103	G	0.488128	2864	0.0115084	0.0248182	0.642857	0.64903	0.680883	1
rs11211383	1	38254943	C	0.26598	2863	-0.0539535	-0.0280396	0.0543309	0.0589578	0.598688	0.999651
rs11205722	1	38290568	G	0.205482	2864	-0.0371913	-0.0302154	0.21837	0.227029	0.0296915	1
rs11578167	1	38297898	A	0.0480098	2864	-0.0993797	-0.0588097	0.0910561	0.0972132	0.410475	1
rs17466728	1	38301155	T	0.0303771	2864	-0.0489223	-0.072415	0.499305	0.507295	0.745912	1
rs11205858	1	38302087	A	0.323848	2864	0.0298811	0.0266843	0.262799	0.271753	0.797995	1
rs486563	1	38331636	A	0.130063	2864	-0.00824373	-0.0366478	0.822022	0.825269	0.28273	1
rs1108182	1	38331939	G	0.402933	2864	0.0244038	0.0256133	0.340703	0.349732	0.37173	1
rs1108183	1	38331981	G	0.406948	2864	-0.0173385	-0.0254988	0.496521	0.50454	0.642344	1
rs544700	1	38332120	G	0.279874	2862	0.00426258	0.0280363	0.879157	0.881381	0.308022	0.999302
rs523864	1	38333555	G	0.151536	2864	-0.0425642	-0.0338495	0.208589	0.217152	0.00700799	1
rs12409682	1	38341610	A	0.072102	2864	-0.0134884	-0.0482449	0.779798	0.783779	1	1
rs7530333	1	38367260	G	0.0705307	2864	0.00791953	0.0486599	0.870713	0.87309	1	1
rs16824722	1	38422644	C	0.110374	2863	-0.00695274	-0.0399489	0.861833	0.86437	0.634949	0.999651
rs17534243	1	38423504	G	0.23733	2861	-0.0399028	-0.0287517	0.165185	0.173164	0.0558771	0.998953
rs6600353	1	38457904	A	0.21264	2864	-0.00022743	-0.0301049	0.993972	0.994084	0.241338	1
rs2637882	1	38504834	A	0.310929	2864	-0.00596895	-0.026874	0.824229	0.827437	0.861537	1
rs12075234	1	38510801	G	0.439071	2864	-0.00941595	-0.0244889	0.700609	0.705899	0.00883795	1
rs11586251	1	38672323	A	0.374651	2864	0.0168929	0.0258592	0.513585	0.521424	0.604164	1
rs2252282	1	38690474	A	0.401187	2864	0.00849859	0.0258405	0.742241	0.746856	0.0800717	1
rs1329817	1	38709564	A	0.233589	2864	-0.0172448	-0.0294345	0.557963	0.565288	1	1
rs3011195	1	38849340	T	0.118715	2864	0.12792	0.0375715	0.000662324	0.000833023	0.0197615	1
rs1925379	1	38849442	A	0.0654679	2864	0.103568	0.0496534	0.0369955	0.0406448	0.166204	1
rs11211039	1	38854820	G	0.126222	2864	-0.00936094	-0.0378891	0.804861	0.808408	0.308766	1
rs17482903	1	38876548	A	0.0682612	2864	-0.0484355	-0.0498381	0.331122	0.340167	0.379991	1
rs12119819	1	38953898	A	0.0136173	2864	-0.14946	-0.106745	0.161466	0.169382	0.412262	1
rs9439072	1	39051415	A	0.240573	2864	0.053569	0.0287576	0.0624937	0.0675145	0.183504	1
rs11538784	1	39102287	A	0.161138	2864	0.00520583	0.0338995	0.877952	0.880198	1	1
rs1984600	1	39264514	G	0.137491	2862	0.0230017	0.036139	0.524465	0.532185	1	0.999302
rs12036597	1	39302307	G	0.117144	2864	0.0295478	0.0387579	0.445841	0.454321	1	1
rs7546735	1	39323208	G	0.282472	2864	-0.0223817	-0.0275156	0.415977	0.424675	0.549136	1
rs4660401	1	39330275	A	0.451466	2864	-0.0251378	-0.0251854	0.318225	0.327282	0.52143	1
rs11580989	1	39356273	G	0.343925	2864	0.00373289	0.0266241	0.888496	0.890551	0.106417	1
rs6600289	1	39386399	G	0.289979	2864	0.0188005	0.0274767	0.493826	0.501872	1	1
rs17502518	1	39409397	A	0.0391061	2864	-0.00742144	-0.0628899	0.906062	0.907796	0.0390889	1
rs6700698	1	39435241	A	0.232716	2864	-0.0116797	-0.0297926	0.695035	0.700414	0.271703	1
rs663978	1	39452272	A	0.0319483	2864	-0.0342063	-0.0720756	0.63508	0.641367	0.118123	1
rs2254542	1	39475701	A	0.0431215	2864	-0.0254263	-0.0624655	0.683974	0.689526	0.0637113	1
rs16837533	1	39476434	A	0.175279	2864	0.0279605	0.032373	0.387754	0.396615	0.196176	1
rs4660214	1	39504137	G	0.222067	2864	0.0109555	0.0298453	0.713563	0.718647	0.626358	1
rs3818806	1	39520858	A	0.221718	2864	0.0104477	0.029881	0.726607	0.731479	0.664841	1
rs2039597	1	39522471	A	0.155028	2864	0.00327485	0.0344428	0.924251	0.925651	0.943237	1
rs1984143	1	39528904	G	0.289455	2864	0.0114045	0.0272787	0.675893	0.68157	0.413624	1
rs2275186	1	39538642	G	0.289281	2864	0.0107698	0.027277	0.692969	0.69838	0.388319	1
rs16826069	1	39569642	G	0.230272	2864	0.0172364	0.0294206	0.557969	0.565293	0.526989	1
rs11586824	1	39589749	G	0.146337	2853	-0.00297883	-0.0353283	0.932803	0.934046	1	0.996159
rs636083	1	39594268	G	0.287635	2863	0.016744	0.0273321	0.540133	0.547673	0.411704	0.999651
rs2296172	1	39608404	G	0.221194	2864	0.0191505	0.0298215	0.520763	0.528523	0.448005	1
rs1180383	1	39618854	A	0.287535	2864	0.0160613	0.0273266	0.556697	0.564038	0.411639	1
rs645061	1	39667426	A	0.228701	2864	-0.0134875	-0.0300013	0.653024	0.659047	0.223307	1
rs683135	1	39668047	A	0.287884	2864	0.0155474	0.0273064	0.569107	0.576292	0.386535	1
rs587404	1	39681093	A	0.286487	2864	0.0158092	0.0273398	0.563098	0.570358	0.360878	1
rs617577	1	39683271	G	0.0743715	2864	-0.00216619	-0.047923	0.963947	0.964615	0.343452	1
rs2296173	1	39685938	G	0.220845	2864	0.0194129	0.0298566	0.515561	0.523378	0.480722	1
rs1775654	1	39722667	A	0.270078	2814	0.00575422	0.028511	0.840054	0.842981	0.702301	0.982542
rs6656934	1	39739305	A	0.0931047	2857	0.00290813	0.0427349	0.945745	0.94675	0.580426	0.997556
rs1180341	1	39765395	A	0.459323	2864	-0.0079091	-0.0246325	0.748147	0.752663	0.122928	1
rs9438922	1	39765525	A	0.00506285	2864	-0.01443	-0.176076	0.934684	0.935893	1	1
rs9438923	1	39770392	G	0.00523743	2864	-0.0309069	-0.173086	0.85828	0.860881	1	1
rs4660293	1	39800767	G	0.251746	2864	0.0165341	0.0285494	0.562494	0.569762	0.585452	1
rs17513135	1	39808273	A	0.246858	2864	0.00901843	0.0286633	0.75304	0.757475	0.3931	1
rs2242500	1	39810489	G	0.352479	2864	0.00764913	0.0257935	0.766808	0.77101	0.251708	1
rs12130013	1	39811617	A	0.0977654	2864	-0.0403459	-0.0417054	0.333343	0.342385	0.59565	1
rs12037222	1	39837548	A	0.239176	2864	-0.00236614	-0.0289948	0.93496	0.936164	0.4722	1
rs4660892	1	39877171	A	0.325768	2864	-0.0332297	-0.0262043	0.204761	0.213284	0.148163	1
rs784622	1	39877401	G	0.10234	2863	0.0132066	0.0410789	0.747836	0.752357	1	0.999651
rs3754353	1	39879101	G	0.100384	2864	0.0017181	0.0416944	0.967131	0.96774	0.606028	1
rs9662128	1	39922743	A	0.320182	2864	0.0208331	0.0268748	0.438227	0.446767	0.49218	1
rs12136257	1	39958528	C	0.140761	2863	-0.0125998	-0.035664	0.723869	0.728785	0.589154	0.999651
rs17569868	1	40065498	C	0.193678	2863	0.00325266	0.0315334	0.917844	0.919362	0.952277	0.999651
rs12127002	1	40157555	A	0.130936	2864	0.0248439	0.0370833	0.50289	0.510842	0.681324	1
rs7521792	1	40175114	A	0.0116969	2864	0.000346827	0.114772	0.997589	0.997634	0.32331	1
rs3103778	1	40206358	A	0.468052	2864	0.0147188	0.024821	0.553183	0.560566	0.573589	1
rs3131694	1	40229022	G	0.152409	2864	0.0487352	0.0342503	0.154761	0.162556	0.218957	1
rs6699941	1	40243526	A	0.0455656	2864	0.103911	0.0599023	0.0827994	0.0886612	0.831722	1
rs12038117	1	40431133	A	0.432786	2864	-0.0111181	-0.0253599	0.661086	0.666988	0.361025	1
rs2284447	1	40513065	A	0.0539455	2864	0.0305221	0.055571	0.582837	0.589845	0.579835	1
rs209587	1	40598187	G	0.107542	2864	0.080386	0.040409	0.0466671	0.0508883	0.626193	1
rs209580	1	40618568	G	0.377444	2864	-0.0550108	-0.026056	0.0347508	0.0382561	0.120931	1
rs209619	1	40677344	A	0.439071	2864	0.0143464	0.0251282	0.568049	0.575248	0.87947	1
rs3795348	1	40734036	G	0.0263986	2860	0.103917	0.0771949	0.178252	0.186436	0.44856	0.998603
rs6666654	1	40741650	A	0.0263617	2864	0.103828	0.07717	0.17848	0.186668	0.448174	1
rs11585667	1	40742252	A	0.00226955	2864	-0.166443	-0.262069	0.525356	0.533065	1	1
rs3795347	1	40746743	G	0.197626	2864	-0.0352193	-0.0311926	0.258859	0.267795	0.81364	1
rs3795344	1	40753817	A	0.0268855	2864	0.103917	0.076483	0.174243	0.182367	0.459865	1
rs16865685	1	40822024	G	0.0141411	2864	0.00147128	0.106237	0.98895	0.989155	1	1
rs16865687	1	40823820	G	0.0565642	2864	0.024851	0.0537481	0.643823	0.649982	0.725409	1
rs7520333	1	40862837	G	0.491222	2848	-0.0210717	-0.0243463	0.386764	0.39563	0.00388453	0.994413
rs2744805	1	40893086	A	0.204609	2864	0.0102864	0.0296711	0.72883	0.733666	2.02711e-05	1
rs2025897	1	41064964	A	0.0693087	2864	0.00753303	0.0498503	0.879887	0.882098	0.109995	1
rs17361735	1	41094957	A	0.0979399	2864	0.0110581	0.0413713	0.789246	0.793065	0.168742	1
rs11209170	1	41157217	G	0.404687	2859	0.00449062	0.025251	0.858849	0.86144	0.560395	0.998254
rs11209376	1	41270935	G	0.215957	2864	0.00458263	0.0307608	0.881573	0.883753	0.0976301	1
rs2802549	1	41273133	G	0.333275	2864	-0.00143059	-0.026717	0.957297	0.958088	0.256191	1
rs10789304	1	41359999	T	0.230447	2864	0.00668583	0.0295145	0.820791	0.82406	0.833184	1
rs12118372	1	41388875	A	0.115708	2852	-0.00393813	-0.0392354	0.920049	0.921527	0.646984	0.99581
rs1472570	1	41486671	C	0.446404	2864	0.00788528	0.025429	0.756493	0.760869	0.121247	1
rs13374676	1	41513482	A	0.331645	2863	-0.00229117	-0.026786	0.931835	0.933096	0.191257	0.999651
rs11209799	1	41528143	C	0.439246	2864	-0.042706	-0.025159	0.0896127	0.0957199	0.761531	1
rs7525740	1	41657453	A	0.447607	2863	0.00907641	0.0247339	0.713647	0.71873	0.186157	0.999651
rs7534137	1	41682443	A	0.13338	2864	0.00462212	0.0366292	0.899584	0.901437	1	1
rs10890022	1	41692093	A	0.496333	2863	-0.0327669	-0.0250651	0.191121	0.199482	0.501151	0.999651
rs3738577	1	41745936	A	0.0766411	2864	-0.00883624	-0.0467854	0.850197	0.852943	0.895284	1
rs12031740	1	41803686	C	0.0453911	2864	-0.0624819	-0.0597795	0.295928	0.304975	0.830778	1
rs7519954	1	41808230	A	0.254015	2864	0.0213314	0.0281495	0.448578	0.457036	0.0758159	1
rs6689038	1	41815220	A	0.232193	2864	-0.00719557	-0.0298046	0.809226	0.812697	0.294619	1
rs10890144	1	41857984	C	0.42176	2863	-0.0110326	-0.025066	0.659835	0.665757	0.514794	0.999651
rs1109255	1	41864295	G	0.460356	2863	-0.00268097	-0.0248844	0.914204	0.915789	0.706801	0.999651
rs1409767	1	41879290	G	0.0914804	2864	-0.0890507	-0.0428022	0.037478	0.0411577	0.367525	1
rs7517484	1	42023043	G	0.040852	2864	-0.0093703	-0.0625696	0.880955	0.883147	0.475454	1
rs972352	1	42070191	C	0.188373	2864	-0.018908	-0.0319373	0.553827	0.561202	0.806857	1
rs2993120	1	42123424	C	0.46037	2864	-0.0327094	-0.0244131	0.180301	0.188515	0.0130741	1
rs811461	1	42133300	A	0.203878	2862	-0.0515566	-0.0309053	0.0952738	0.101573	1	0.999302
rs783622	1	42139575	A	0.47624	2862	0.006662	0.0245134	0.7858	0.789677	0.0611365	0.999302
rs1320514	1	42143343	G	0.0274092	2864	0.0390635	0.074465	0.599869	0.60665	0.0187389	1
rs7515635	1	42180657	G	0.479923	2864	0.0177143	0.0252241	0.482506	0.490663	0.216972	1
rs11210560	1	42233037	A	0.123123	2863	-0.0557097	-0.0382245	0.144996	0.152599	0.387059	0.999651
rs6703436	1	42283966	A	0.0771648	2864	-0.017352	-0.0464561	0.708766	0.713927	0.598861	1
rs3818727	1	42394232	A	0.12081	2864	0.00905859	0.0375148	0.809193	0.812665	0.0526538	1
rs12045477	1	42410750	A	0.254714	2864	-0.030775	-0.0281054	0.273523	0.282518	0.0613881	1
rs624614	1	42420501	A	0.167074	2864	-0.00110158	-0.0332524	0.973573	0.974062	0.687003	1
rs17377240	1	42496837	C	0.302549	2864	0.0119056	0.0271223	0.660691	0.666599	1	1
rs16829262	1	42501462	C	0.43558	2864	0.0104838	0.024596	0.669932	0.6757	0.0249488	1
rs913426	1	42578778	G	0.49162	2864	-0.0239641	-0.0251529	0.340724	0.349753	0.295436	1
rs17369380	1	42600422	C	0.0359637	2864	-0.0641356	-0.0670896	0.339088	0.34812	1	1
rs11587576	1	42608373	G	0.0621508	2864	0.0738782	0.0512537	0.149466	0.157159	0.51969	1
rs11210633	1	42626712	G	0.489149	2857	0.0166514	0.0251323	0.50762	0.515523	0.454005	0.997556
rs4075750	1	42649844	A	0.136701	2831	0.000248421	0.0364952	0.994569	0.99467	0.936625	0.988478
rs12131762	1	42682130	G	0.343401	2864	-0.0152158	-0.0262615	0.562322	0.569592	0.901124	1
rs1359292	1	42826846	A	0.092211	2863	0.0896427	0.0425023	0.0349338	0.038451	0.218125	0.999651
rs11576375	1	42912579	G	0.057652	2862	0.123536	0.0531445	0.0200968	0.022523	0.603569	0.999302
rs10493113	1	42931097	A	0.105272	2864	0.021223	0.0404863	0.600138	0.606915	0.766343	1
rs11581921	1	42988517	A	0.0867971	2863	0.105649	0.0441426	0.0166947	0.0188248	0.906012	0.999651
rs17385526	1	43010618	G	0.280377	2864	-0.0251943	-0.0278241	0.365209	0.374168	0.745804	1
rs4660234	1	43091859	A	0.106669	2864	0.040849	0.040082	0.308138	0.317195	0.492386	1
rs12022524	1	43098795	A	0.278282	2864	-0.0549234	-0.0274499	0.0454078	0.0495586	0.226397	1
rs1843115	1	43104727	G	0.278205	2863	-0.0554961	-0.0274469	0.0431819	0.0472055	0.209223	0.999651
rs17382631	1	43128798	A	0.184532	2864	0.0234456	0.0322656	0.467444	0.475741	0.61941	1
rs4660687	1	43150126	C	0.415328	2864	0.00322503	0.0251249	0.897864	0.899748	0.538318	1
rs1098782	1	43153613	G	0.484986	2864	-0.00390722	-0.0246655	0.874135	0.87645	0.294893	1
rs11586615	1	43158903	G	0.0843521	2863	0.0352201	0.0442525	0.426097	0.434726	0.181795	0.999651
rs12718444	1	43181766	A	0.197626	2864	0.0187231	0.0314456	0.551568	0.558971	0.596182	1
rs751210	1	43183446	A	0.333101	2864	-0.00291252	-0.0262541	0.911667	0.913299	0.50097	1
rs7522674	1	43189368	A	0.196229	2864	0.0162911	0.0315135	0.605187	0.611895	0.635989	1
rs4660698	1	43230975	A	0.315293	2864	0.00421499	0.0266662	0.874406	0.876716	0.603493	1
rs7512851	1	43340720	A	0.00785615	2864	-0.0278155	-0.135583	0.837451	0.840425	0.0123921	1
rs12087752	1	43413660	G	0.275314	2864	0.029243	0.0280707	0.297522	0.306571	0.482365	1
rs622762	1	43468240	G	0.120328	2863	0.0292281	0.0378956	0.440541	0.449063	0.250705	0.999651
rs2484714	1	43472557	A	0.0595321	2864	0.0525633	0.0518527	0.310724	0.319782	0.12913	1
rs10890246	1	43490665	G	0.415852	2864	-0.0199776	-0.0253513	0.430679	0.439275	0.758391	1
rs2784466	1	43524564	A	0.461592	2864	-0.0340628	-0.0249432	0.172059	0.18015	0.910201	1
rs34783763	1	43530349	G	0.108878	2861	-0.0712669	-0.0397822	0.0732249	0.0787123	0.562653	0.998953
rs4141741	1	43615587	A	0.365223	2864	0.0169786	0.0262005	0.516967	0.524769	0.183501	1
rs660899	1	43889593	A	0.332751	2864	0.0536278	0.0263103	0.041522	0.0454482	0.674092	1
rs669446	1	43902366	A	0.309358	2864	0.0279003	0.0269534	0.300608	0.30966	0.965118	1
rs10890283	1	44026732	A	0.442214	2864	-0.0338398	-0.0252254	0.179759	0.187965	0.5699	1
rs246776	1	44047286	A	0.459323	2864	-9.84742e-05	-0.0252289	0.996886	0.996943	0.328168	1
rs2906457	1	44111162	A	0.261872	2864	0.0114443	0.0283091	0.68602	0.69154	0.961451	1
rs3791101	1	44138837	A	0.289731	2863	0.0104751	0.0270347	0.69841	0.703736	0.0928887	0.999651
rs9429225	1	44258826	G	0.124127	2864	0.0239575	0.0378378	0.526626	0.534321	0.931494	1
rs16831558	1	44274750	A	0.11889	2864	-0.0333447	-0.0386906	0.388781	0.397638	0.592753	1
rs2428965	1	44275496	A	0.361383	2864	-0.00963539	-0.0259592	0.710508	0.715641	0.967707	1
rs4660763	1	44276163	A	0.301327	2864	-0.00146186	-0.0270272	0.956865	0.957664	0.657332	1
rs12031261	1	44297263	A	0.215782	2864	-0.00107487	-0.0300614	0.971477	0.972006	0.472826	1
rs11210969	1	44367634	A	0.332402	2864	0.0484527	0.0264028	0.0664857	0.0716864	0.966424	1
rs2429060	1	44376093	A	0.333799	2864	-0.0407812	-0.0262927	0.12089	0.127937	0.674574	1
rs12401615	1	44408446	A	0.0368366	2864	-0.0228992	-0.0657883	0.727784	0.732637	0.59148	1
rs325150	1	44540500	A	0.0298534	2864	-0.106127	-0.0733947	0.148183	0.155851	1	1
rs325143	1	44546314	G	0.372556	2864	0.0379522	0.0257364	0.140306	0.147811	0.96813	1
rs161720	1	44563240	G	0.300978	2864	-0.0221606	-0.0269532	0.410971	0.419701	0.450361	1
rs11210984	1	44577067	A	0.329549	2863	-0.0110474	-0.0262266	0.673587	0.6793	0.271559	0.999651
rs3866642	1	44658509	A	0.386348	2864	0.00741033	0.0250521	0.767386	0.771578	0.0247171	1
rs6429540	1	44674872	A	0.276536	2864	0.0170801	0.0277606	0.53838	0.54594	0.779394	1
rs6684444	1	44709099	C	0.0195531	2864	0.0194655	0.0891885	0.827233	0.830388	0.296145	1
rs11211006	1	44710561	A	0.232798	2863	0.0481216	0.0293529	0.101126	0.107612	0.753778	0.999651
rs16832018	1	44752085	A	0.184183	2864	0.0755515	0.0320179	0.0182915	0.0205633	0.803735	1
rs16832028	1	44756771	A	0.138094	2864	0.0901875	0.036192	0.0127054	0.0144566	0.75346	1
rs172018	1	44791402	A	0.257682	2864	0.0439633	0.0284593	0.1224	0.129486	1	1
rs10890311	1	44840355	A	0.190992	2864	-0.0465804	-0.0316511	0.141107	0.148629	0.951784	1
rs12057238	1	45030728	C	0.177374	2864	-0.0139238	-0.0327095	0.670341	0.676103	0.847648	1
rs11211037	1	45048138	C	0.378666	2864	-0.0271655	-0.0252643	0.282262	0.291282	0.0952891	1
rs7525308	1	45066105	G	0.369239	2864	-0.0360237	-0.0253831	0.15584	0.163655	0.0845945	1
rs11211059	1	45202805	A	0.236208	2864	-0.033242	-0.0291924	0.254819	0.263735	0.678612	1
rs4660834	1	45285806	A	0.138792	2864	-0.0116167	-0.0360776	0.747458	0.751986	0.937668	1
rs6688318	1	45286139	G	0.139141	2864	-0.0137697	-0.0360531	0.702515	0.707775	0.876147	1
rs11211086	1	45483358	A	0.41236	2864	-0.00678335	-0.0251707	0.78755	0.791398	0.589461	1
rs6429562	1	45536845	A	0.262046	2864	-0.0275998	-0.0276824	0.318757	0.327814	0.0156422	1
rs12094184	1	45539038	A	0.099022	2863	-0.0145992	-0.0416186	0.725749	0.730635	0.833935	0.999651
rs2153608	1	45586528	G	0.235859	2864	-0.0126811	-0.0295106	0.667404	0.673211	0.534138	1
rs12137389	1	45710973	A	0.0169344	2864	0.0440934	0.0973464	0.650582	0.656642	1	1
rs622798	1	45787858	C	0.432612	2864	-0.0138248	-0.0250475	0.580986	0.588019	0.703573	1
rs2088102	1	45805561	G	0.464909	2864	-0.00979053	-0.0247805	0.692776	0.698191	0.408838	1
rs2275084	1	45858226	C	0.00750698	2864	-0.297983	-0.144827	0.0396372	0.0434502	1	1
rs3014238	1	45862801	G	0.464735	2864	-0.00764224	-0.0246915	0.756935	0.761304	0.215383	1
rs3014237	1	45862839	A	0.273918	2864	0.0134626	0.0277489	0.627563	0.633958	0.510761	1
rs4660880	1	45883627	A	0.291027	2864	0.00550967	0.0272003	0.839479	0.842417	0.389833	1
rs4626927	1	46021232	A	0.438897	2864	-0.0125024	-0.0247842	0.613945	0.620533	0.171962	1
rs7524495	1	46039519	G	0.425279	2864	-0.00964812	-0.0248787	0.698159	0.703489	0.168897	1
rs6686134	1	46150855	G	0.424904	2863	-0.0100027	-0.0248519	0.687322	0.692822	0.126134	0.999651
rs4076006	1	46210663	A	0.425279	2864	-0.0116145	-0.0248252	0.639892	0.646109	0.108476	1
rs946527	1	46258557	A	0.287709	2864	0.00706329	0.0270977	0.794355	0.798085	0.100933	1
rs2275426	1	46260139	A	0.425105	2864	-0.0114699	-0.0248185	0.643974	0.650131	0.100345	1
rs1707322	1	46277734	A	0.288932	2864	0.0100304	0.0270241	0.710514	0.715647	0.0690868	1
rs1768816	1	46301186	G	0.427871	2856	-0.0122913	-0.0248773	0.621251	0.627736	0.126327	0.997207
rs3855959	1	46406461	A	0.375873	2864	-0.00250195	-0.0254652	0.921734	0.923181	0.282547	1
rs7520850	1	46656255	A	0.0974162	2864	0.0324432	0.0419974	0.439816	0.448344	1	1
rs11211276	1	46678389	A	0.219972	2864	-0.0460018	-0.0300212	0.125446	0.132608	0.870302	1
rs12567374	1	46746041	A	0.00401536	2864	-0.204832	-0.189137	0.278817	0.287828	0.0433745	1
rs942255	1	46762379	A	0.194483	2864	-0.00643444	-0.0312014	0.836617	0.839605	0.370841	1
rs1440491	1	46965645	A	0.232274	2863	-0.0305933	-0.0293509	0.297259	0.306307	0.637232	0.999651
rs648028	1	46983825	C	0.0223464	2864	0.0326888	0.0839684	0.697055	0.702402	0.652197	1
rs594387	1	46985973	G	0.201117	2864	-0.014756	-0.0308316	0.632222	0.638551	0.415454	1
rs694194	1	46987812	C	0.201117	2864	-0.0153729	-0.0308656	0.618442	0.624966	0.485184	1
rs17449603	1	47006320	G	0.0638966	2864	-0.048126	-0.0498466	0.334303	0.343344	0.0279539	1
rs4646485	1	47051426	G	0.377968	2864	0.0167606	0.0258127	0.516135	0.523946	0.578238	1
rs1553390	1	47265380	G	0.282123	2864	-0.0313794	-0.0274014	0.252137	0.261039	0.310237	1
rs2245116	1	47418433	C	0.459846	2864	-0.0137682	-0.0248323	0.579272	0.586327	0.47508	1
rs2248907	1	47428403	A	0.203387	2864	-0.0112713	-0.0306495	0.713062	0.718153	0.326965	1
rs12760654	1	47441912	A	0.21037	2864	-0.0793083	-0.0303758	0.00903043	0.0103926	0.652658	1
rs977747	1	47457264	A	0.392284	2864	-0.0215906	-0.0252054	0.391673	0.400515	0.209761	1
rs2984618	1	47463025	A	0.392595	2863	-0.0243537	-0.0252327	0.334463	0.343503	0.255761	0.999651
rs2845	1	47466667	A	0.0508031	2864	-0.00149598	-0.0559707	0.978677	0.979072	0.170646	1
rs1028646	1	47490945	G	0.46037	2864	0.0197942	0.0244305	0.417812	0.426498	0.0130741	1
rs2821096	1	47515313	A	0.462116	2864	0.021029	0.0244346	0.389444	0.398297	0.014601	1
rs6588196	1	47516077	A	0.395601	2864	-0.0206406	-0.0249123	0.407371	0.416123	0.0171167	1
rs2820986	1	47605452	C	0.287137	2861	0.00660547	0.0271434	0.807731	0.811228	0.120481	0.998953
rs2622911	1	47609991	C	0.00226955	2864	0.247231	0.261942	0.345252	0.354271	1	1
rs517384	1	47725250	A	0.109113	2864	-0.0268496	-0.0399682	0.501728	0.509693	1	1
rs17103391	1	47773921	A	0.0298534	2864	0.0374145	0.0734142	0.610306	0.616944	1	1
rs1508603	1	47804420	A	0.0122249	2863	-0.141552	-0.112349	0.207694	0.216248	0.347506	0.999651
rs12094838	1	47823157	A	0.374913	2862	0.0126167	0.0254476	0.620042	0.626544	0.24743	0.999302
rs1108866	1	47832676	A	0.0520251	2864	-0.0830206	-0.055109	0.131944	0.139262	0.0556922	1
rs1108865	1	47832696	A	0.0520251	2864	-0.0830206	-0.055109	0.131944	0.139262	0.0556922	1
rs10493129	1	47844572	A	0.0214735	2864	-0.0372545	-0.0861211	0.665318	0.671157	1	1
rs11577726	1	47854425	G	0.2355	2862	-0.0263223	-0.0291855	0.367111	0.376063	0.603602	0.999302
rs11211576	1	47864335	A	0.496334	2864	-0.0187066	-0.0250274	0.454797	0.463204	0.653789	1
rs4926925	1	47886385	G	0.0190293	2864	-0.0743154	-0.0920517	0.41948	0.428155	0.625379	1
rs12565582	1	47931098	A	0.0551676	2864	-0.107638	-0.0544508	0.0480648	0.0523629	0.8575	1
rs1561573	1	48000530	A	0.483048	2861	0.0159676	0.024555	0.515512	0.52333	0.0786298	0.998953
rs12085966	1	48001982	A	0.132158	2864	-0.0549135	-0.0370313	0.138103	0.14556	0.463389	1
rs3844086	1	48005090	A	0.355272	2864	0.0202815	0.0256535	0.42918	0.437787	0.131345	1
rs11211609	1	48055254	G	0.0787635	2863	0.000493497	0.0459758	0.991436	0.991595	0.520545	0.999651
rs17299092	1	48347697	T	0.0630898	2861	-0.0383627	-0.0517634	0.458622	0.466996	0.343576	0.998953
rs7518922	1	48614894	A	0.194755	2860	-0.0158553	-0.0310115	0.609162	0.615815	0.136173	0.998603
rs12024734	1	48737857	A	0.377925	2863	-0.0101982	-0.0256822	0.691299	0.696737	0.873696	0.999651
rs1418952	1	48751102	G	0.0611034	2864	0.0840561	0.0527189	0.110842	0.117617	0.143255	1
rs2246670	1	48775461	C	0.32507	2864	-0.00883389	-0.026634	0.740133	0.744782	0.932122	1
rs17104533	1	48819733	G	0.124651	2864	-0.0519537	-0.0383901	0.175956	0.184107	0.0490174	1
rs11579440	1	48825010	G	0.144902	2864	-0.0442733	-0.0360316	0.219171	0.227837	0.0498112	1
rs319978	1	48839966	A	0.203561	2864	-0.0155273	-0.0309143	0.615478	0.622044	0.954086	1
rs319977	1	48840667	G	0.0223464	2864	0.177764	0.0837802	0.0338558	0.0373024	0.652197	1
rs12096331	1	48993943	G	0.113478	2864	0.0170923	0.0386503	0.658322	0.664267	0.0942081	1
rs11586913	1	48994486	A	0.113478	2864	0.0170923	0.0386503	0.658322	0.664267	0.0942081	1
rs2298200	1	49133987	A	0.167249	2864	0.00894646	0.033448	0.789104	0.792925	0.840479	1
rs1343424	1	49149407	G	0.212989	2864	0.0126567	0.0302907	0.676063	0.681737	0.655656	1
rs10493139	1	49179984	G	0.105383	2861	0.0192311	0.040487	0.634791	0.641082	0.766555	0.998953
rs3127553	1	49210592	G	0.35824	2864	-0.0266719	-0.025759	0.300463	0.309515	0.393644	1
rs657452	1	49362434	A	0.381685	2861	-0.00983854	-0.025626	0.701031	0.706315	0.936859	0.998953
rs2982389	1	49580475	C	0.0469623	2864	0.00509988	0.0591909	0.931339	0.932609	0.833147	1
rs7531656	1	49601250	A	0.321404	2864	-0.0130189	-0.026639	0.625045	0.631476	0.931727	1
rs1766377	1	49689671	G	0.20618	2864	0.0317741	0.0306873	0.300476	0.309528	0.731902	1
rs946106	1	49701076	G	0.206006	2864	0.0307987	0.0306909	0.315614	0.324671	0.689364	1
rs2211454	1	49917435	T	0.0471369	2864	0.0102802	0.0588633	0.861359	0.863904	1	1
rs1474910	1	49964737	G	0.2012	2833	0.0227456	0.0311387	0.465109	0.473427	0.770316	0.989176
rs12128108	1	50066008	A	0.204784	2864	0.030149	0.0310042	0.330842	0.339888	0.687929	1
rs9659092	1	50216176	A	0.437806	2862	-0.000817374	-0.0255397	0.974469	0.974942	0.0806384	0.999302
rs4259707	1	50301178	A	0.208973	2864	0.0352871	0.030704	0.250446	0.259339	0.865352	1
rs11583200	1	50332407	G	0.387744	2864	-0.0156974	-0.0256792	0.541009	0.548538	0.636715	1
rs12024093	1	50401438	A	0.189071	2864	0.0401338	0.0317125	0.205674	0.214206	0.760555	1
rs12734294	1	50410609	A	0.0748953	2864	-0.0967535	-0.0464579	0.0372871	0.0409548	0.0774326	1
rs12043872	1	50417478	A	0.0478352	2864	-0.0115934	-0.0589154	0.843999	0.846856	0.40985	1
rs11576734	1	50447146	G	0.0331704	2864	0.0218369	0.0696152	0.753764	0.758186	1	1
rs4926853	1	50481809	G	0.313266	2857	0.00124783	0.0269572	0.96308	0.963764	0.861956	0.997556
rs17386142	1	50588370	A	0.0665154	2864	0.0148057	0.0496498	0.765548	0.769772	0.451603	1
rs7525764	1	50617284	G	0.491271	2864	-0.00311778	-0.0251784	0.901452	0.90327	0.295405	1
rs17363904	1	50664637	A	0.251573	2860	0.01453	0.0288437	0.614438	0.621018	0.728159	0.998603
rs17106184	1	50682573	A	0.0989874	2864	-0.0586453	-0.0417639	0.160256	0.16815	0.916591	1
rs12747336	1	50752629	G	0.0300384	2863	0.0630337	0.0731549	0.388882	0.397737	1	0.999651
rs1846522	1	50753793	A	0.0967179	2864	-0.0496823	-0.0420996	0.237955	0.246771	0.915018	1
rs11585301	1	50893627	G	0.0598813	2864	-0.0120062	-0.0517337	0.816478	0.819822	0.131733	1
rs6588391	1	50897748	A	0.104436	2863	0.00820944	0.0410749	0.841586	0.844486	0.483563	0.999651
rs12086130	1	50946191	A	0.0963158	2850	-0.0682526	-0.0422101	0.105884	0.112515	0.914154	0.995112
rs12090545	1	50966572	G	0.0967179	2864	-0.0654621	-0.0420919	0.119895	0.126916	0.915018	1
rs6691061	1	51007607	G	0.393506	2864	-0.00548969	-0.0258935	0.832099	0.835167	0.117333	1
rs12089747	1	51018743	A	0.0968925	2864	-0.0676648	-0.0419819	0.107014	0.113679	0.830588	1
rs3789588	1	51039111	A	0.0956704	2864	-0.065089	-0.0423316	0.124147	0.131277	1	1
rs4926873	1	51176183	G	0.392458	2864	-0.00649208	-0.0258985	0.802066	0.805662	0.126404	1
rs12088739	1	51279474	G	0.0960196	2864	-0.0655232	-0.0424485	0.122687	0.129781	0.667593	1
rs12565180	1	51335302	G	0.0684358	2864	-0.0884904	-0.0488224	0.0699096	0.0752585	0.302506	1
rs953825	1	51345507	C	0.0188547	2864	0.0595366	0.0915477	0.515476	0.523295	1	1
rs4926884	1	51472314	A	0.119364	2861	-0.0146542	-0.038359	0.702441	0.707702	0.789991	0.998953
rs17106459	1	51481522	G	0.0286313	2864	0.0404029	0.0734641	0.582341	0.589356	0.0819397	1
rs474668	1	51523497	A	0.346315	2863	-0.021269	-0.0262743	0.418229	0.426912	0.74128	0.999651
rs7538988	1	51590129	G	0.0380587	2864	0.041678	0.0645397	0.518427	0.526213	0.304526	1
rs12062229	1	52000441	A	0.147378	2860	-0.0292766	-0.0350693	0.403818	0.412592	0.65544	0.998603
rs4422953	1	52083470	G	0.467004	2864	-0.0174449	-0.0249844	0.485033	0.493165	0.940155	1
rs2809944	1	52190126	G	0.321229	2864	-0.00834541	-0.0268804	0.756208	0.760589	0.440506	1
rs1935294	1	52196546	A	0.324197	2864	-0.00871672	-0.0267593	0.744617	0.749192	0.579318	1
rs10888744	1	52204400	C	0.269902	2864	0.0630625	0.0280257	0.0244382	0.0272135	0.962211	1
rs11205934	1	52388265	C	0.0125698	2864	0.0933833	0.112486	0.40644	0.415198	1	1
rs17401875	1	52405215	A	0.106182	2863	0.0344579	0.040544	0.395388	0.404209	0.92146	0.999651
rs4394585	1	52485622	G	0.351781	2864	0.00554359	0.0260641	0.831568	0.834646	0.967323	1
rs2180768	1	52490409	A	0.129015	2864	0.0102698	0.0369613	0.781125	0.785084	0.560894	1
rs2753399	1	52546945	A	0.356145	2864	-0.033041	-0.0265737	0.213732	0.222346	0.022507	1
rs3087473	1	52640427	C	0.00890363	2864	0.127842	0.133118	0.336868	0.345905	1	1
rs17107212	1	52660707	A	0.109113	2864	0.0481953	0.0400198	0.228479	0.237224	0.923417	1
rs970917	1	52680868	A	0.206674	2862	0.0549084	0.030951	0.0760562	0.0816582	0.494457	0.999302
rs12080399	1	52736167	G	0.206499	2862	0.0563353	0.0309169	0.0684318	0.0737174	0.607694	0.999302
rs7553627	1	52759566	A	0.207228	2864	0.0575717	0.0309095	0.0625201	0.0675421	0.53162	1
rs835036	1	52769828	G	0.355622	2864	0.000412622	0.0263619	0.987512	0.987743	0.165866	1
rs12022581	1	52773836	G	0.109637	2864	0.0453146	0.0399608	0.256804	0.265731	0.848483	1
rs17373654	1	52777500	G	0.0363128	2864	0.0120998	0.0668191	0.856302	0.858939	1	1
rs835337	1	52831694	A	0.284766	2862	0.0306015	0.0274113	0.264259	0.273219	0.463064	0.999302
rs835338	1	52834354	A	0.284916	2864	0.0304815	0.0273764	0.265526	0.274491	0.435759	1
rs6671552	1	52854173	G	0.0492318	2864	0.063798	0.0558831	0.253606	0.262516	0.00387526	1
rs6670797	1	52870169	A	0.310405	2864	-0.0524007	-0.0266616	0.0493679	0.0537365	0.337014	1
rs12067454	1	52909916	A	0.367318	2864	-0.0167241	-0.0254715	0.511451	0.519314	0.136924	1
rs443751	1	52926020	G	0.367318	2864	-0.016804	-0.0255089	0.510055	0.517932	0.184662	1
rs448788	1	52934208	A	0.495285	2863	0.0107582	0.0247545	0.663856	0.669717	0.525123	0.999651
rs2275758	1	53149713	A	0.0263617	2864	-0.0049749	-0.077184	0.948608	0.94956	0.448174	1
rs7544995	1	53220960	G	0.116096	2864	0.0452875	0.0383257	0.237345	0.246156	0.122256	1
rs11206087	1	53316877	A	0.0422781	2862	0.0480571	0.0625519	0.442324	0.450832	0.485567	0.999302
rs3766775	1	53340134	A	0.296962	2864	-0.00324851	-0.0276117	0.906345	0.908074	0.210104	1
rs1288371	1	53349180	A	0.309358	2864	-0.00108319	-0.0271396	0.968164	0.968754	0.457195	1
rs3766781	1	53351770	A	0.281774	2864	0.00904748	0.0277103	0.744044	0.748629	0.926455	1
rs899976	1	53366401	A	0.209672	2864	0.0368667	0.0302388	0.222775	0.231472	0.214775	1
rs1679933	1	53384287	G	0.39595	2864	-0.0139718	-0.0252747	0.580401	0.587441	0.434796	1
rs10888768	1	53388129	G	0.406883	2862	-0.00924514	-0.0251924	0.713632	0.718715	0.485745	0.999302
rs1288351	1	53396926	A	0.0974843	2862	-0.0156111	-0.0423405	0.712348	0.717451	0.456228	0.999302
rs17785382	1	53480541	G	0.444134	2864	0.0256129	0.024739	0.300518	0.30957	0.173144	1
rs867884	1	53539560	G	0.38111	2864	0.0104252	0.0257329	0.685382	0.690912	0.721468	1
rs11206152	1	53603683	C	0.335138	2863	-0.00786829	-0.02632	0.76498	0.769214	0.769199	0.999651
rs6588477	1	53609775	A	0.0820531	2864	0.0422935	0.0453011	0.350505	0.359511	0.804462	1
rs17108398	1	53618573	A	0.269204	2864	-0.00916126	-0.0272969	0.737161	0.741859	0.00170564	1
rs6588478	1	53626121	G	0.418471	2864	0.00551683	0.0246797	0.823117	0.826345	0.0126006	1
rs1288612	1	53732646	A	0.03125	2864	-0.071541	-0.0714992	0.317028	0.326085	0.756619	1
rs943519	1	53738134	G	0.0309332	2861	-0.0803079	-0.0718678	0.263807	0.272765	0.752351	0.998953
rs519786	1	53760096	A	0.123254	2864	-0.0252557	-0.0378877	0.505031	0.512962	0.931062	1
rs3855969	1	53781916	G	0.109811	2864	-0.0163109	-0.039817	0.682066	0.687647	0.923798	1
rs11206170	1	53783514	G	0.363303	2864	-0.0210732	-0.0258214	0.414436	0.423144	0.746688	1
rs941125	1	53896461	A	0.34876	2863	-0.0582537	-0.0257692	0.0237846	0.0265091	0.149811	0.999651
rs10788961	1	53897421	G	0.0364874	2864	0.00625098	0.0660277	0.924575	0.92597	0.428701	1
rs4927026	1	53913431	G	0.185774	2861	-0.0764502	-0.032051	0.0170668	0.0192304	1	0.998953
rs4927033	1	53973250	A	0.121683	2864	-0.0395101	-0.0381064	0.299813	0.308864	1	1
rs11206236	1	54127796	A	0.168704	2863	0.007058	0.0336765	0.833993	0.837028	0.230177	0.999651
rs2284454	1	54138550	G	0.168588	2862	0.000621894	0.0337277	0.985289	0.985562	0.182335	0.999302
rs11206244	1	54148289	A	0.36243	2864	-0.0111099	-0.0258443	0.667286	0.673094	0.839779	1
rs12094788	1	54208833	G	0.0321229	2864	-0.0345505	-0.0698229	0.62072	0.627212	0.216842	1
rs637590	1	54234291	A	0.355971	2864	0.000221592	0.0252969	0.993011	0.993141	0.00256216	1
rs6672989	1	54247060	G	0.366399	2863	-0.00155032	-0.0252999	0.951138	0.952043	0.0217565	0.999651
rs4927055	1	54348334	A	0.309532	2864	0.00858772	0.0267421	0.748111	0.752628	0.457419	1
rs6679049	1	54366851	G	0.0160671	2863	-0.114857	-0.099895	0.250235	0.259127	1	0.999651
rs671539	1	54379745	G	0.163757	2864	0.0233999	0.0336334	0.486596	0.494713	1	1
rs4061073	1	54469331	G	0.312675	2864	0.00962076	0.0267266	0.71887	0.723868	0.601998	1
rs3766431	1	54502624	A	0.45194	2861	-0.0143198	-0.0249644	0.566232	0.573453	0.791659	0.998953
rs3766430	1	54503239	G	0.453212	2864	-0.0111098	-0.0249677	0.656345	0.662319	0.850477	1
rs590041	1	54515059	A	0.419839	2863	-0.00776437	-0.0251756	0.757772	0.762127	0.817936	0.999651
rs587271	1	54515699	G	0.30831	2864	-0.0130611	-0.0269926	0.628474	0.634856	1	1
rs11206327	1	54543868	A	0.0225209	2864	0.129348	0.0841828	0.124414	0.131551	1	1
rs12041903	1	54545022	A	0.0405028	2864	0.0891085	0.0633513	0.159553	0.167435	1	1
rs4927088	1	54547791	A	0.15014	2864	-0.0102831	-0.0350284	0.76909	0.773254	0.660398	1
rs4926631	1	54576823	A	0.0558659	2864	-0.0502055	-0.0543806	0.355891	0.364881	0.860457	1
rs12092071	1	54583558	A	0.198149	2864	-0.0414878	-0.0314927	0.187711	0.196028	0.410421	1
rs2073109	1	54600142	A	0.439923	2863	0.0236496	0.0251977	0.347956	0.356968	0.676526	0.999651
rs1883783	1	54663544	A	0.386308	2863	-0.044822	-0.0255288	0.0791329	0.0848557	0.905868	0.999651
rs11206355	1	54678170	G	0.154504	2864	0.0447328	0.0341415	0.190122	0.19847	0.352183	1
rs12758577	1	54680741	A	0.380545	2863	0.0293888	0.0257142	0.253079	0.261987	0.811989	0.999651
rs10888853	1	54692047	A	0.434137	2862	-0.0272967	-0.0251081	0.276963	0.285968	0.969657	0.999302
rs7550485	1	54701081	A	0.0684358	2864	0.0885807	0.0496145	0.0742	0.0797273	0.559291	1
rs4926648	1	54701533	A	0.460196	2864	-0.0153798	-0.0249551	0.537698	0.545265	0.910202	1
rs4927133	1	54726111	A	0.244491	2859	-0.0575266	-0.0284464	0.0431476	0.0471692	0.0428675	0.998254
rs2873449	1	54731882	A	0.101292	2863	-0.0188997	-0.040708	0.642451	0.648631	0.122923	0.999651
rs4060885	1	54734826	A	0.0391061	2864	-0.0255786	-0.0635064	0.687116	0.692619	0.204672	1
rs299895	1	54735036	A	0.199721	2864	-0.00103206	-0.0309478	0.973397	0.97389	0.520078	1
rs2133003	1	54795145	G	0.288361	2861	-0.0173011	-0.027229	0.525173	0.532884	0.274293	0.998953
rs12090964	1	54796439	G	0.0288059	2864	-0.092105	-0.0732958	0.208891	0.217457	0.0853465	1
rs2060387	1	54861904	C	0.347067	2864	0.0133288	0.0259612	0.607664	0.614339	0.409738	1
rs2060386	1	54861905	G	0.34731	2862	0.0131348	0.0259653	0.612954	0.619555	0.433371	0.999302
rs2117262	1	54862468	G	0.350209	2864	0.0143889	0.0258349	0.577558	0.584635	0.267591	1
rs7530161	1	54902316	A	0.0103003	2864	-0.100861	-0.122041	0.408549	0.417294	0.260511	1
rs501260	1	54904432	G	0.244937	2864	-0.009546	-0.0288662	0.740873	0.74551	0.686072	1
rs11802570	1	54968496	A	0.0642458	2864	-0.00876866	-0.0497575	0.860115	0.862683	0.0409198	1
rs628667	1	55021742	G	0.232193	2864	0.026795	0.0291608	0.358162	0.367146	0.228049	1
rs2286202	1	55023272	G	0.103635	2861	0.0257971	0.0405539	0.524699	0.532415	0.366089	0.998953
rs886738	1	55034340	A	0.334498	2861	0.0386333	0.0262672	0.141351	0.148878	0.556855	0.998953
rs6701489	1	55131047	A	0.0886872	2864	-0.0108225	-0.0444566	0.807665	0.811164	0.16389	1
rs35526112	1	55163856	G	0.266236	2864	-0.0166023	-0.0273527	0.54387	0.551365	0.00133848	1
rs2317949	1	55207095	A	0.212989	2864	0.0180646	0.0300117	0.547228	0.554683	0.147271	1
rs17111412	1	55236158	A	0.012685	2838	-0.0364227	-0.11094	0.742677	0.747284	0.366233	0.990922
rs2479398	1	55252662	G	0.126222	2864	-0.00898969	-0.0370902	0.808491	0.811975	0.204365	1
rs2479394	1	55258652	G	0.290255	2863	-0.00444964	-0.0274844	0.871387	0.873752	0.927778	0.999651
rs11206508	1	55258949	A	0.148568	2864	0.0136932	0.0349664	0.695347	0.700721	0.882702	1
rs11206510	1	55268627	G	0.189071	2864	0.0302331	0.031209	0.332679	0.341722	0.0443107	1
rs2495495	1	55269144	A	0.140526	2850	-0.0205764	-0.0352727	0.559657	0.56696	0.0522786	0.995112
chr1:55271537	1	55271537	A	0.171962	2864	-0.0206423	-0.0325515	0.525987	0.533689	0.148505	1
chr1:55271570	1	55271570	A	0.207968	2849	0.00517265	0.0306491	0.865978	0.86844	0.570032	0.994763
chr1:55271750	1	55271750	A	0.384602	2864	-0.00360687	-0.0258344	0.888964	0.89101	0.364248	1
chr1:55272107	1	55272107	C	0.0151885	2864	0.0105908	0.102608	0.917791	0.91931	1	1
rs2495488	1	55272794	A	0.082926	2864	-0.00547862	-0.0441173	0.90117	0.902994	0.0185874	1
chr1:55273017	1	55273017	G	0.174991	2863	-0.0184932	-0.0323007	0.566962	0.574174	0.119965	0.999651
chr1:55273564	1	55273564	A	0.174301	2860	-0.0151272	-0.032342	0.639981	0.646197	0.0911151	0.998603
chr1:55273566	1	55273566	C	0.0253142	2864	-0.0221199	-0.0791753	0.779954	0.783932	0.70422	1
chr1:55274725	1	55274725	C	0.173534	2864	-0.0135958	-0.0323833	0.674602	0.680299	0.103099	1
chr1:55275260	1	55275260	C	0.0851955	2864	-0.0133484	-0.0437079	0.760062	0.764379	0.0307269	1
chr1:55275303	1	55275303	A	0.0837421	2854	-0.0188457	-0.0440465	0.668754	0.67454	0.0197178	0.996508
rs17111503	1	55276036	G	0.251746	2864	0.0139935	0.028558	0.624133	0.630577	0.585452	1
rs2479408	1	55276776	C	0.185754	2864	0.0157528	0.0319405	0.621876	0.628352	0.804779	1
chr1:55276989	1	55276989	A	0.015014	2864	-0.121737	-0.101978	0.232573	0.241349	0.476798	1
chr1:55277174	1	55277174	G	0.135824	2864	-0.0324675	-0.0361801	0.369513	0.378456	0.632649	1
rs2479409	1	55277238	G	0.344918	2863	0.0137637	0.0258877	0.594953	0.601801	0.172578	0.999651
chr1:55278035	1	55278035	A	0.136697	2864	-0.0306329	-0.0361238	0.396439	0.405255	0.692129	1
rs11591147	1	55278235	A	0.0115223	2864	0.239061	0.11727	0.0414944	0.045419	1	1
rs28385701	1	55278239	A	0.00698324	2864	0.0654115	0.150054	0.662896	0.668771	1	1
rs11583680	1	55278256	A	0.134318	2844	-0.0371665	-0.0365623	0.309378	0.318436	0.747611	0.993017
chr1:55278320	1	55278320	A	0.0445182	2864	-0.00968304	-0.0593406	0.870379	0.872762	0.0730624	1
chr1:55278392	1	55278392	A	0.0153631	2864	0.0267052	0.102043	0.79355	0.797294	1	1
chr1:55278449	1	55278449	A	0.320182	2864	-0.00648532	-0.0266826	0.807964	0.811457	0.965783	1
chr1:55278514	1	55278514	A	0.136697	2864	-0.0306329	-0.0361238	0.396439	0.405255	0.692129	1
chr1:55278691	1	55278691	G	0.136697	2864	-0.0306329	-0.0361238	0.396439	0.405255	0.692129	1
chr1:55279944	1	55279944	C	0.0153631	2864	0.0267052	0.102043	0.79355	0.797294	1	1
chr1:55280774	1	55280774	A	0.0464385	2864	-0.0166061	-0.0583145	0.775823	0.779872	0.132786	1
chr1:55281801	1	55281801	C	0.223813	2864	0.00832382	0.0299779	0.781269	0.785225	0.746982	1
chr1:55281943	1	55281943	G	0.0467877	2864	-0.0223569	-0.0581362	0.700563	0.705855	0.136272	1
chr1:55281963	1	55281963	A	0.000872905	2864	-0.0383879	-0.421801	0.927485	0.928826	1	1
rs4927193	1	55282460	G	0.132507	2864	-0.0143182	-0.0363609	0.693742	0.699142	0.290077	1
chr1:55282488	1	55282488	A	0.0471369	2864	-0.0184042	-0.0577381	0.749914	0.754401	0.0598534	1
chr1:55282603	1	55282603	A	0.0153631	2864	0.0267052	0.102043	0.79355	0.797294	1	1
chr1:55284583	1	55284583	G	0.308767	2863	0.00354818	0.0268696	0.894943	0.89688	0.72619	0.999651
chr1:55285470	1	55285470	G	0.185121	2863	0.0155191	0.03185	0.626078	0.632494	0.457555	0.999651
chr1:55285583	1	55285583	A	0.047486	2864	-0.0081577	-0.0575783	0.887333	0.889408	0.092507	1
chr1:55285631	1	55285631	A	0.0410265	2864	-0.108558	-0.0624372	0.0820916	0.087927	0.47902	1
rs10888897	1	55285649	A	0.359637	2864	-0.0050768	-0.0260711	0.845605	0.848433	0.62641	1
chr1:55285771	1	55285771	A	0.0153631	2864	-0.0896481	-0.0997227	0.368666	0.377612	0.143084	1
chr1:55286109	1	55286109	C	0.174232	2864	0.0137909	0.0325865	0.672142	0.677877	0.435735	1
rs11206514	1	55288592	C	0.359811	2864	-0.00619898	-0.026075	0.812086	0.815507	0.598126	1
rs572512	1	55289932	A	0.341655	2864	0.0229249	0.0257517	0.373343	0.38227	0.034111	1
rs11800243	1	55290681	A	0.0429469	2864	-0.00522313	-0.0623096	0.933195	0.934431	0.17176	1
rs11806638	1	55290748	A	0.052898	2864	0.0226351	0.0562391	0.687331	0.692831	0.349401	1
rs625619	1	55290754	G	0.44361	2864	-0.0160247	-0.0253764	0.527727	0.535409	0.198041	1
rs2483205	1	55290904	A	0.447083	2863	0.0112961	0.0247086	0.647548	0.653653	0.140382	0.999651
rs2495477	1	55291055	G	0.413932	2864	-0.0281369	-0.0254907	0.269677	0.278658	0.375929	1
rs7552841	1	55291340	A	0.3853	2864	-0.0130012	-0.0260213	0.617331	0.623871	0.0827427	1
rs533375	1	55295949	A	0.153282	2864	0.0375892	0.0348469	0.280723	0.289739	0.388316	1
rs584626	1	55296572	G	0.152933	2864	0.0407871	0.0349119	0.242692	0.251538	0.34837	1
rs585131	1	55296704	G	0.152933	2864	0.0407871	0.0349119	0.242692	0.251538	0.34837	1
rs540796	1	55296785	A	0.152933	2864	0.0407871	0.0349119	0.242692	0.251538	0.34837	1
rs562556	1	55296825	G	0.152933	2864	0.0407871	0.0349119	0.242692	0.251538	0.34837	1
rs483462	1	55297988	G	0.295391	2864	0.0114389	0.0276429	0.679013	0.684642	0.192992	1
rs630431	1	55299911	G	0.293471	2864	0.0091202	0.0277401	0.742327	0.74694	0.137256	1
rs12067569	1	55301217	A	0.0389316	2864	-0.0371139	-0.06418	0.563076	0.570337	0.619469	1
rs505151	1	55301775	G	0.0469301	2834	-0.0616644	-0.0581998	0.289359	0.298395	0.0554962	0.989525
rs662145	1	55302416	G	0.230272	2864	0.0028333	0.0299594	0.924655	0.926048	0.187589	1
rs11583974	1	55324306	A	0.0546439	2864	0.104795	0.0546973	0.0553763	0.0600558	0.85557	1
rs2274539	1	55336614	G	0.0439944	2864	-0.0402879	-0.0611066	0.5097	0.517581	0.657306	1
rs11585666	1	55375232	C	0.141934	2864	0.0357855	0.0363365	0.324705	0.333758	0.0549044	1
rs1475701	1	55411134	G	0.044577	2849	-0.0448929	-0.0601694	0.455602	0.464002	0.506926	0.994763
rs4926670	1	55435268	A	0.0963687	2864	-0.0510737	-0.0420777	0.224826	0.233541	0.747388	1
rs11206535	1	55484849	G	0.0639636	2861	0.0556181	0.0517846	0.28281	0.291832	0.084469	0.998953
rs11206536	1	55484923	G	0.0638966	2864	0.0564032	0.0517893	0.276114	0.285117	0.0844515	1
rs4927207	1	55486216	A	0.159567	2864	0.0281296	0.034547	0.415506	0.424208	0.108739	1
rs7551981	1	55491754	C	0.371463	2863	-0.00373595	-0.0257975	0.884854	0.886975	0.904424	0.999651
rs2802860	1	55496223	A	0.1772	2864	0.0164601	0.0330895	0.618878	0.625396	0.140301	1
rs2647281	1	55497292	G	0.0563897	2864	-0.0718933	-0.0550717	0.19174	0.200109	0.0326687	1
rs6662286	1	55502915	A	0.0848464	2864	-0.0053036	-0.044646	0.90544	0.907185	0.904126	1
rs1874776	1	55516107	A	0.206529	2864	0.0134927	0.0311955	0.665362	0.6712	0.138563	1
rs11206551	1	55517554	G	0.206006	2864	0.0142498	0.0312036	0.647907	0.654006	0.170197	1
rs10888913	1	55559214	C	0.205307	2864	0.0182629	0.0310008	0.555787	0.563138	0.64678	1
rs10489488	1	55565310	A	0.0179818	2864	-0.0141932	-0.0945726	0.880703	0.882899	1	1
rs207164	1	55572358	A	0.255587	2864	-0.0147058	-0.0284946	0.605791	0.612491	0.844362	1
rs207150	1	55579053	A	0.0815293	2864	0.0553969	0.0456141	0.224569	0.233281	0.900802	1
rs207145	1	55580731	G	0.108589	2864	0.0747361	0.0399975	0.0616898	0.0666733	0.923247	1
rs207127	1	55588172	G	0.0934008	2864	0.0270005	0.0427908	0.528049	0.535728	1	1
rs12068546	1	55612917	A	0.0394553	2864	0.0873518	0.0626311	0.163105	0.171049	0.0412626	1
rs767078	1	55623144	A	0.331006	2864	0.00819586	0.0264424	0.756598	0.760972	0.93275	1
rs12065953	1	55666027	A	0.0309008	2864	0.014806	0.0718424	0.836721	0.839707	0.752152	1
rs1998013	1	55730618	A	0.00680866	2864	-0.0404895	-0.151962	0.789896	0.793704	1	1
rs2748704	1	55731463	C	0.171968	2861	-0.000131497	-0.0327233	0.996794	0.996853	0.325088	0.998953
rs17416166	1	55739420	A	0.0410265	2864	0.0137232	0.0624593	0.826093	0.829268	0.47902	1
rs904610	1	55762002	A	0.246159	2864	-0.0045937	-0.0284911	0.87191	0.874265	0.118743	1
rs1913446	1	55833719	A	0.385649	2864	0.00371374	0.0255791	0.884564	0.88669	1	1
rs12566360	1	55933683	A	0.214635	2863	0.0362686	0.0301452	0.228925	0.237674	0.505857	0.999651
rs1165479	1	55940980	A	0.125218	2863	-0.0459172	-0.0374003	0.219552	0.228221	0.494492	0.999651
rs1165517	1	56004943	G	0.462814	2864	-0.0114926	-0.0246491	0.641038	0.647238	0.142833	1
rs12066643	1	56012866	A	0.112245	2842	-0.025688	-0.0389804	0.509897	0.517776	0.0896168	0.992318
rs1926908	1	56017535	A	0.117883	2863	0.0071879	0.038611	0.852318	0.855026	0.928539	0.999651
rs6684261	1	56132257	G	0.238128	2864	-0.00110188	-0.0290732	0.969767	0.970327	0.571062	1
rs11206690	1	56179815	G	0.161369	2863	-0.0185358	-0.0338516	0.583994	0.590987	1	0.999651
rs7553801	1	56199988	A	0.0553422	2864	0.02169	0.0544144	0.690182	0.695638	0.858245	1
rs6658481	1	56206821	A	0.324895	2864	0.0345303	0.027106	0.2027	0.2112	0.0408769	1
rs12026754	1	56285401	A	0.0218226	2864	-0.0789642	-0.0861655	0.359444	0.368423	0.645338	1
rs12133795	1	56364805	C	0.310754	2864	0.0118268	0.0266772	0.657526	0.663483	0.359888	1
rs4926709	1	56367451	C	0.229923	2864	-0.00446846	-0.0296045	0.880024	0.882233	1	1
rs778125	1	56378334	G	0.311976	2864	0.0122056	0.0266101	0.646461	0.652582	0.296124	1
rs6694549	1	56468801	A	0.274267	2864	-0.00369068	-0.028316	0.896298	0.898211	0.133018	1
rs2793683	1	56534137	A	0.16329	2863	0.0026214	0.0340009	0.938545	0.939683	0.338629	0.999651
rs9436538	1	56538199	A	0.194202	2863	0.0211056	0.0314678	0.502409	0.510367	1	0.999651
rs3005911	1	56567553	A	0.338163	2864	-0.0069088	-0.026214	0.792123	0.795892	0.646204	1
rs2994560	1	56568413	G	0.339036	2864	-0.00838811	-0.0261946	0.748799	0.753304	0.64648	1
rs7556596	1	56572500	G	0.372905	2864	-0.00128515	-0.0255996	0.959962	0.960703	0.548957	1
rs17113792	1	56601984	G	0.0766411	2864	0.00822808	0.0471384	0.861432	0.863976	0.596118	1
rs6666317	1	56677473	A	0.257682	2864	0.0279518	0.0285261	0.32715	0.336201	0.883487	1
chr1:56678946	1	56678946	G	0.0548184	2864	0.0231704	0.0539024	0.667299	0.673107	0.144316	1
chr1:56679324	1	56679324	A	0.155955	2863	0.0133951	0.0343578	0.696633	0.701986	1	0.999651
chr1:56679375	1	56679375	G	0.231844	2864	0.0281345	0.0293696	0.33809	0.347124	0.599874	1
chr1:56680016	1	56680016	G	0.0139665	2864	-0.00869538	-0.105499	0.934312	0.935527	0.428482	1
chr1:56680151	1	56680151	A	0.437675	2864	-0.0419829	-0.0252182	0.0959557	0.102277	0.6487	1
chr1:56680268	1	56680268	A	0.105971	2864	0.0218219	0.0401622	0.586893	0.593847	0.430498	1
chr1:56681082	1	56681082	A	0.105971	2864	0.0228319	0.0401621	0.5697	0.576877	0.430498	1
chr1:56681550	1	56681550	A	0.00122635	2854	-0.321677	-0.356362	0.366702	0.375655	1	0.996508
chr1:56682069	1	56682069	A	0.461418	2864	-0.0454825	-0.0252443	0.0715936	0.0770135	0.275726	1
chr1:56682138	1	56682138	A	0.33537	2864	0.0151117	0.0263141	0.565778	0.573006	0.801558	1
chr1:56683275	1	56683275	A	0.37548	2863	-0.0366001	-0.0259249	0.158017	0.165872	0.403006	0.999651
chr1:56684451	1	56684451	A	0.375527	2848	-0.0378583	-0.02599	0.145214	0.152822	0.47201	0.994413
chr1:56684810	1	56684810	A	0.210894	2864	-0.00582305	-0.0305741	0.848951	0.85172	0.910655	1
chr1:56685146	1	56685146	T	0.116969	2864	0.0109247	0.0389951	0.779359	0.783347	0.650763	1
chr1:56686317	1	56686317	G	0.470496	2864	-0.0392804	-0.0252156	0.119286	0.126291	0.276765	1
chr1:56686929	1	56686929	G	0.500524	2864	0.0371096	0.025312	0.142624	0.150179	0.10007	1
chr1:56687289	1	56687289	A	0.117144	2864	0.00864674	0.0389766	0.824435	0.827639	0.651083	1
chr1:56687326	1	56687326	A	0.211418	2864	-0.00354526	-0.030533	0.907564	0.90927	0.955316	1
[truncated: 128,333 more rows]

## Sheet: Controls
SNP	Chromosome	Position (Buile 36)	Minor (effective) allele	Minor allele frequency	N	Beta	SE beta	P-value	P-value (Genomic controll corrected)	P-value (hwe exact test)	SNP call rate
rs1815606	1	1130298	A	0.338235	408	0.0136175	0.067363	0.839798	0.841278	0.824856	1
rs6603811	1	1695996	A	0.0563725	408	0.174093	0.143709	0.225731	0.230104	0.628222	1
rs7531583	1	1696020	A	0.214461	408	0.0840421	0.0774089	0.277616	0.282138	0.768495	1
rs12044597	1	1698661	G	0.52451	408	-0.0596305	-0.0643971	0.354456	0.358979	1	1
rs9660180	1	1712891	A	0.519656	407	-0.0515961	-0.064158	0.421279	0.425639	0.842769	0.997549
rs6603803	1	1802548	G	0.523399	406	-0.0649557	-0.0643861	0.313048	0.317599	1	0.995098
rs6688000	1	1813782	A	0.0514706	408	0.102603	0.149254	0.491806	0.495868	0.614275	1
rs2803328	1	1864186	G	0.514742	407	-0.0437044	-0.0639905	0.494618	0.498666	0.842771	0.997549
rs2803291	1	1882185	A	0.141278	407	-0.062324	-0.0936476	0.50572	0.509711	0.837853	0.997549
rs10910029	1	2025239	A	0.409091	407	0.00898782	0.0673627	0.893858	0.894846	0.259047	0.997549
rs425277	1	2059032	A	0.3125	408	-0.00814817	-0.0728945	0.910998	0.911827	0.049938	1
rs2460002	1	2109693	A	0.296069	407	-0.0193597	-0.0685374	0.777583	0.779611	0.340851	0.997549
rs380190	1	2132378	C	0.324755	408	-0.0160664	-0.0726003	0.824859	0.826472	0.0315294	1
rs260513	1	2170384	A	0.482587	402	0.00895361	0.0627743	0.886581	0.887635	0.370806	0.985294
rs10797416	1	2172202	G	0.430147	408	0.0256413	0.0642209	0.689696	0.692452	0.762424	1
rs12385717	1	2174715	C	0.0477941	408	-0.102509	-0.154125	0.505984	0.509974	0.614068	1
rs7553178	1	2194615	G	0.303922	408	0.0537667	0.0695648	0.439581	0.443875	1	1
rs2645091	1	2214505	A	0.0992647	408	-0.0440671	-0.108603	0.684917	0.68771	0.783202	1
rs1809822	1	2221455	C	0.0588235	408	0.184444	0.140354	0.1888	0.192972	0.383236	1
rs12080256	1	2241217	A	0.181373	408	-0.0436405	-0.0840682	0.603685	0.607078	0.73986	1
rs2055204	1	2270521	G	0.464461	408	0.0513149	0.0672943	0.445735	0.450005	0.0904316	1
rs2840542	1	2281540	A	0.232843	408	-0.0787539	-0.0769526	0.306115	0.310664	0.67731	1
rs10910077	1	2380191	A	0.270833	408	0.0127251	0.0720674	0.859845	0.861143	1	1
rs6668720	1	2410773	A	0.394608	408	-0.0763317	-0.0656402	0.244878	0.249323	0.917703	1
rs2281852	1	2483476	A	0.458231	407	-0.124567	-0.065381	0.0567471	0.0591037	0.549201	0.997549
rs2257763	1	2483520	A	0.463568	398	-0.123554	-0.0649601	0.0571721	0.0595392	0.840215	0.97549
rs11589185	1	2531587	A	0.121921	406	0.019522	0.0982339	0.842474	0.843929	1	0.995098
rs4648360	1	2713205	A	0.454545	407	0.0359274	0.066745	0.590384	0.593867	0.271199	0.997549
rs7538063	1	2715812	A	0.132353	408	0.0452349	0.0930967	0.627044	0.630272	0.391173	1
rs10909880	1	2717664	A	0.454657	408	0.0313784	0.0666813	0.637945	0.641095	0.231335	1
rs1869970	1	2819411	G	0.196078	408	0.0367144	0.079837	0.645612	0.648705	0.639922	1
rs4648432	1	2829617	C	0.304668	407	0.0691536	0.0700671	0.323661	0.328211	1	0.997549
rs2045331	1	2832130	A	0.311275	408	0.0410131	0.0697953	0.556787	0.560486	1	1
rs4648445	1	2880205	G	0.329657	408	-0.0153339	-0.0717615	0.830798	0.832358	0.116968	1
rs1138513	1	2966676	G	0.199755	408	0.096677	0.080583	0.230248	0.234641	1	1
rs7525173	1	2986056	C	0.452206	408	0.0137159	0.0635349	0.829082	0.830657	0.484822	1
rs876740	1	3027473	A	0.366422	408	0.135473	0.0665326	0.0417316	0.0436822	0.915311	1
rs2651902	1	3064166	A	0.175245	408	-0.0432661	-0.0820894	0.598152	0.601582	0.231442	1
rs17390062	1	3079709	G	0.0637255	408	0.312044	0.129842	0.0162499	0.017277	0.672655	1
rs2817138	1	3095136	A	0.143382	408	-0.0464052	-0.0884885	0.599986	0.603404	0.156129	1
rs2651912	1	3100595	A	0.346814	408	0.0202635	0.0652398	0.756105	0.758316	0.191302	1
rs12095716	1	3107538	C	0.215686	408	0.0118764	0.0786813	0.880021	0.881136	0.883835	1
rs2817148	1	3127996	G	0.00980392	408	0.23728	0.326426	0.467286	0.471465	1	1
rs10158583	1	3133928	A	0.0552826	407	0.172291	0.135027	0.201967	0.206221	0.114141	0.997549
rs1553288	1	3134605	A	0.0453431	408	0.151165	0.15341	0.324445	0.328994	0.574592	1
rs10492940	1	3187607	A	0.123775	408	0.00343099	0.100069	0.972649	0.972905	0.489963	1
rs4648376	1	3199491	G	0.4375	408	-0.0617225	-0.0655384	0.346308	0.35084	0.762741	1
rs2500294	1	3199627	G	0.416667	408	-0.0616562	-0.0665551	0.354242	0.358765	0.47648	1
rs7553849	1	3204030	A	0.207108	408	-0.0287905	-0.0801616	0.719479	0.721995	0.763284	1
rs12743017	1	3219045	A	0.0784314	408	-0.0400466	-0.122337	0.743407	0.745725	0.494742	1
rs2483289	1	3254050	A	0.319853	408	0.0316337	0.0696	0.649464	0.652528	0.733899	1
rs946758	1	3262923	A	0.400735	408	0.0507737	0.0663135	0.443878	0.448155	0.680055	1
rs2493275	1	3297894	A	0.0812808	406	0.143081	0.116772	0.220461	0.224811	0.739063	0.995098
rs2493292	1	3318519	A	0.161765	408	0.0190554	0.0845162	0.821618	0.82326	0.270619	1
rs2493264	1	3343809	A	0.0737101	407	-0.0245936	-0.121093	0.839059	0.840545	0.469414	0.997549
rs4431782	1	3480967	G	0.0845588	408	-0.0335788	-0.116978	0.774072	0.77613	0.755348	1
rs3765690	1	3554678	A	0.0612745	408	-0.140539	-0.126818	0.267777	0.272282	0.0542041	1
rs7515164	1	3644607	A	0.0637255	408	0.135834	0.130398	0.297556	0.302101	0.672655	1
rs1181871	1	3674181	A	0.474265	408	-0.0772944	-0.0633208	0.222207	0.226565	0.691276	1
rs1175549	1	3681587	C	0.21201	408	-0.0305805	-0.0785287	0.696967	0.699665	1	1
rs10492943	1	3755284	A	0.161765	408	-0.0178972	-0.0832268	0.829735	0.831305	0.0654301	1
rs12757243	1	3802470	A	0.0122549	408	-0.762228	-0.290602	0.00871771	0.00936648	1	1
rs12046333	1	3910202	G	0.0588235	408	0.0348225	0.134847	0.796224	0.79809	0.640325	1
rs11587331	1	3939756	G	0.416667	408	-0.0539751	-0.0627242	0.389505	0.393958	0.1539	1
rs4378174	1	3980745	A	0.134804	408	0.0521135	0.0941771	0.58002	0.583571	1	1
rs12026862	1	3985403	G	0.0110294	408	0.34935	0.3097	0.259309	0.263794	1	1
rs3856168	1	4016464	A	0.0759804	408	0.0289333	0.117515	0.805519	0.807304	0.27405	1
rs10799180	1	4022324	A	0.126536	407	0.0652083	0.0948826	0.491923	0.495985	0.499729	0.997549
rs9628649	1	4031878	G	0.36152	408	0.0901729	0.0632514	0.153976	0.157867	0.02418	1
rs6688343	1	4131617	G	0.362745	408	-0.0951226	-0.0670261	0.155844	0.159753	0.915104	1
rs12402543	1	4171999	A	0.148284	408	0.0770817	0.0880257	0.381208	0.385681	0.238682	1
rs17448695	1	4267670	A	0.0772059	408	-0.0604483	-0.12084	0.61691	0.62021	1	1
rs12408633	1	4280363	G	0.0514706	408	-0.0643468	-0.149195	0.666255	0.669192	0.614275	1
rs523634	1	4307845	G	0.226716	408	0.00781829	0.0749985	0.916974	0.917748	0.397288	1
rs349413	1	4344566	C	0.302696	408	-0.0696754	-0.0671354	0.299347	0.303893	0.127347	1
rs1762818	1	4386470	A	0.0110294	408	0.171921	0.308282	0.577068	0.580638	1	1
rs350173	1	4446043	A	0.0710784	408	0.00670649	0.13043	0.958992	0.959376	0.247036	1
rs350176	1	4447090	A	0.139706	408	0.0578186	0.0885191	0.513642	0.517591	0.0599646	1
rs780614	1	4451539	G	0.227941	408	0.083917	0.0745826	0.260523	0.265011	0.323714	1
rs4480324	1	4472959	A	0.259852	406	0.0702169	0.0759485	0.355209	0.35973	0.196812	0.995098
rs1024139	1	4540762	G	0.186275	408	-0.0819624	-0.084522	0.332188	0.336734	0.412795	1
rs241224	1	4541659	C	0.0551471	408	-0.0147137	-0.141418	0.917134	0.917907	1	1
rs164780	1	4566354	G	0.261029	408	-0.013447	-0.0721544	0.852159	0.853527	0.607444	1
rs6703429	1	4572615	G	0.332108	408	-0.0325892	-0.0679887	0.631701	0.634896	1	1
rs6426432	1	4621067	G	0.232843	408	-0.027183	-0.0737572	0.712465	0.715039	0.168243	1
rs2035454	1	4622291	G	0.313268	407	0.0189557	0.07035	0.787585	0.789526	0.564835	0.997549
rs10915584	1	4636316	C	0.433824	408	0.030432	0.0643294	0.636166	0.639329	0.84027	1
rs10915587	1	4646496	G	0.380952	399	-0.015562	-0.0655534	0.812351	0.814075	0.39622	0.977941
rs11805709	1	4747454	A	0.286765	408	0.0766266	0.0693817	0.26941	0.273918	0.398327	1
rs12410445	1	4767710	C	0.0555556	405	-0.0975076	-0.145643	0.503178	0.507182	0.624058	0.992647
rs17345447	1	4836912	G	0.064951	408	0.0487201	0.13228	0.712641	0.715213	1	1
rs10915668	1	4873161	A	0.414216	408	0.0744556	0.0642557	0.246562	0.251012	0.683918	1
rs2898852	1	4886464	A	0.171569	408	-0.0496277	-0.0834871	0.552221	0.555947	0.486121	1
rs11586643	1	4888791	A	0.00857843	408	0.813967	0.346711	0.0188906	0.0200341	1	1
rs12041887	1	4902030	G	0.0183824	408	0.210373	0.240754	0.382224	0.386695	1	1
rs11581023	1	4936409	A	0.155637	408	0.0525948	0.0900695	0.559264	0.562947	0.574629	1
rs6657381	1	4938953	A	0.285539	408	-0.00107627	-0.0739372	0.988386	0.988495	0.146138	1
rs6689504	1	4980293	C	0.226716	408	-0.0561933	-0.0787185	0.475319	0.479461	0.480431	1
rs17366825	1	5146223	A	0.0580247	405	-0.066239	-0.132551	0.617269	0.620567	0.141367	0.992647
rs16840177	1	5167643	A	0.0514706	408	0.158432	0.14979	0.290192	0.294731	0.614275	1
rs10915379	1	5169100	G	0.472973	407	0.0639646	0.0663653	0.335133	0.339677	0.27383	0.997549
rs583170	1	5234274	C	0.495098	408	-0.00699621	-0.0643121	0.913373	0.91418	1	1
rs678476	1	5247839	A	0.482759	406	0.00080202	0.0634625	0.989917	0.990011	0.488542	0.995098
rs12125043	1	5249200	A	0.519608	408	-0.0222779	-0.0648454	0.731182	0.733602	0.692745	1
rs9439519	1	5264494	G	0.373775	408	-0.038491	-0.0679842	0.571274	0.574882	0.459041	1
rs12737164	1	5270829	C	0.0294118	408	0.194662	0.192955	0.31305	0.317601	1	1
rs12040942	1	5271019	C	0.394608	408	-0.0193614	-0.0673944	0.773895	0.775954	0.406943	1
rs12131421	1	5395213	A	0.0563725	408	0.124729	0.139664	0.371824	0.376317	1	1
rs6603840	1	5409485	A	0.0490196	408	-0.130124	-0.148432	0.380674	0.385149	1	1
rs10796404	1	5465256	A	0.194853	408	-0.0197739	-0.0812817	0.807791	0.809556	1	1
rs11260699	1	5474026	A	0.23652	408	-0.0054248	-0.0772359	0.944005	0.944528	0.494789	1
rs1775403	1	5559319	G	0.403186	408	0.0362006	0.0668379	0.588082	0.59158	0.411189	1
rs1775421	1	5564169	A	0.0759804	408	0.0950091	0.124217	0.444354	0.448629	0.495693	1
rs13376100	1	5578656	A	0.181373	408	-0.0179516	-0.0845255	0.83181	0.833361	0.73986	1
rs707583	1	5594344	C	0.448529	408	-0.0690488	-0.0650049	0.288141	0.292677	0.763916	1
rs1414379	1	5697261	G	0.469363	408	0.0803298	0.064832	0.215329	0.219654	0.92089	1
rs904534	1	5700044	A	0.464373	407	0.0869273	0.0648321	0.179983	0.184093	0.9208	0.997549
rs4433399	1	5733711	A	0.136029	408	-0.123136	-0.0911377	0.176665	0.18075	0.292532	1
rs11260689	1	5737485	A	0.0232843	408	-0.309453	-0.203755	0.128825	0.132444	0.193006	1
rs1765719	1	5828516	C	0.297794	408	-0.0512162	-0.0692254	0.459393	0.463606	0.553588	1
rs12058375	1	5879496	A	0.0894608	408	-0.0793743	-0.11325	0.483382	0.487485	1	1
rs3747987	1	5888706	A	0.197304	408	0.0165777	0.0798627	0.835559	0.837077	0.754276	1
rs521736	1	5918139	A	0.067402	408	-0.191016	-0.13028	0.142596	0.146371	1	1
rs2273042	1	6071709	A	0.101966	407	-0.0617392	-0.104942	0.55632	0.560022	0.591813	0.997549
rs12142108	1	6093575	A	0.308824	408	0.0189727	0.0671344	0.777478	0.779507	0.104606	1
rs11121299	1	6116605	A	0.193627	408	-0.0360364	-0.0787712	0.647325	0.650405	0.152098	1
rs4908529	1	6145470	A	0.101716	408	0.0215561	0.106451	0.839527	0.841009	1	1
rs2247392	1	6180734	A	0.218137	408	0.0828256	0.0788873	0.293754	0.298296	0.562444	1
rs4908864	1	6185941	A	0.247549	408	0.120493	0.0760135	0.112932	0.116342	0.351956	1
chr1:6190118	1	6190118	A	0.0245098	408	0.418125	0.209074	0.0455124	0.0475724	1	1
chr1:6194665	1	6194665	A	0.0318627	408	0.297103	0.185257	0.108772	0.112123	1	1
chr1:6194724	1	6194724	G	0.376225	408	0.0966634	0.067336	0.151134	0.154997	0.461546	1
chr1:6195793	1	6195793	A	0.0245098	408	0.297071	0.209388	0.155969	0.159878	1	1
rs709209	1	6201001	G	0.355392	408	0.0906855	0.0669978	0.175877	0.179956	1	1
rs846111	1	6201957	C	0.295343	408	0.055093	0.0710327	0.437985	0.442284	0.811887	1
chr1:6218825	1	6218825	C	0.469363	408	0.0749926	0.0644321	0.244464	0.248908	0.92089	1
chr1:6223091	1	6223091	C	0.304668	407	0.091612	0.0691904	0.185484	0.189634	0.814922	0.997549
chr1:6223509	1	6223509	A	0.00122549	408	0.333929	0.916252	0.715521	0.71807	1	1
chr1:6223654	1	6223654	G	0.00490196	408	0.113002	0.459664	0.805809	0.807591	1	1
chr1:6223869	1	6223869	A	0.245098	408	0.127459	0.0747326	0.0880941	0.0911094	1	1
chr1:6223888	1	6223888	C	0.0183824	408	-0.0767012	-0.24138	0.750666	0.752924	1	1
chr1:6225970	1	6225970	A	0.0588235	408	-0.0197905	-0.129091	0.878156	0.879288	0.0413538	1
chr1:6226211	1	6226211	A	0.0919118	408	0.0632916	0.113597	0.57742	0.580988	0.557746	1
chr1:6226353	1	6226353	A	0.00490196	408	0.113002	0.459664	0.805809	0.807591	1	1
chr1:6227640	1	6227640	G	0.39951	408	0.134619	0.0647684	0.0376659	0.0394925	0.837221	1
chr1:6229276	1	6229276	T	0.00490196	408	0.113002	0.459664	0.805809	0.807591	1	1
chr1:6229499	1	6229499	G	0.0943627	408	0.0675406	0.112544	0.548421	0.55217	0.559378	1
chr1:6229842	1	6229842	A	0.247549	408	0.147005	0.073096	0.0443123	0.0463381	0.595662	1
chr1:6229976	1	6229976	G	0.243873	408	0.144916	0.0741394	0.0506255	0.0528254	0.893102	1
chr1:6231282	1	6231282	A	0.333333	408	0.118261	0.067481	0.0796861	0.082545	0.911317	1
chr1:6235018	1	6235018	G	0.332108	408	0.134418	0.0676892	0.047055	0.0491581	1	1
chr1:6235065	1	6235065	A	0.33701	408	0.133446	0.0668283	0.0458417	0.0479109	0.739657	1
chr1:6235573	1	6235573	A	0.00490196	408	0.113002	0.459664	0.805809	0.807591	1	1
chr1:6235664	1	6235664	G	0.33701	408	0.114036	0.0684338	0.095639	0.0987842	0.658276	1
chr1:6236106	1	6236106	A	0.338235	408	0.124585	0.0680832	0.0672659	0.0698679	0.741358	1
chr1:6236525	1	6236525	G	0.336228	403	0.119222	0.0687317	0.0828111	0.0857296	0.823328	0.987745
chr1:6236936	1	6236936	A	0.266585	407	0.127168	0.0728577	0.0809109	0.0837934	0.899297	0.997549
chr1:6237066	1	6237066	G	0.345679	405	0.123861	0.0676523	0.0671225	0.0697214	1	0.992647
chr1:6237409	1	6237409	A	0.338235	408	0.124585	0.0680832	0.0672659	0.0698679	0.741358	1
chr1:6237712	1	6237712	A	0.0367647	408	-0.0843505	-0.162252	0.603152	0.606548	0.0948637	1
chr1:6238804	1	6238804	A	0.338235	408	0.124585	0.0680832	0.0672659	0.0698679	0.741358	1
chr1:6239601	1	6239601	A	0.343137	408	0.123912	0.0672241	0.0652894	0.0678474	1	1
chr1:6239708	1	6239708	A	0.00490196	408	0.113002	0.459664	0.805809	0.807591	1	1
chr1:6239733	1	6239733	A	0.0025	400	-0.568021	-0.45711	0.214003	0.218322	0.00125156	0.980392
chr1:6240007	1	6240007	G	0.34398	407	0.124176	0.0673888	0.0653756	0.0679357	1	0.997549
chr1:6240172	1	6240172	A	0.0367647	408	0.0043794	0.167952	0.979197	0.979392	0.424901	1
chr1:6240418	1	6240418	A	0.343137	408	0.123912	0.0672241	0.0652894	0.0678474	1	1
chr1:6240570	1	6240570	A	0.343137	408	0.123912	0.0672241	0.0652894	0.0678474	1	1
chr1:6240656	1	6240656	G	0.341975	405	0.118436	0.0678422	0.0808542	0.0837356	1	0.992647
rs4908874	1	6245523	A	0.35049	408	0.147684	0.0672737	0.0281445	0.0296512	0.913369	1
rs1999835	1	6272462	A	0.104167	408	0.0818037	0.101307	0.419389	0.423755	0.0630782	1
rs4243830	1	6500458	G	0.132353	408	0.056183	0.093953	0.549846	0.553587	0.667573	1
rs11811007	1	6507244	G	0.129902	408	0.059104	0.0944842	0.531614	0.535463	0.659394	1
rs12046884	1	6517148	A	0.129902	408	0.059104	0.0944842	0.531614	0.535463	0.659394	1
rs12080675	1	6549202	C	0.177419	403	0.0510665	0.0849643	0.547817	0.55157	1	0.987745
rs4908932	1	6562434	A	0.196078	408	0.020647	0.0807469	0.798183	0.800032	0.876053	1
rs6682920	1	6568454	A	0.343137	408	-0.0584403	-0.0661322	0.376864	0.381347	0.380969	1
rs1556036	1	6574315	A	0.295343	408	0.0896666	0.0687209	0.191963	0.196156	0.406904	1
rs7521134	1	6579827	A	0.317402	408	0.080543	0.066526	0.226011	0.230385	0.172194	1
rs2072948	1	6602435	A	0.313725	408	0.0796976	0.0663878	0.22995	0.234341	0.134355	1
rs12137794	1	6628531	A	0.0980392	408	-0.0889754	-0.11087	0.422251	0.426607	0.404231	1
rs2134318	1	6720689	G	0.481618	408	0.0213247	0.0628104	0.734226	0.736621	0.42742	1
rs17441830	1	6844165	G	0.13848	408	-0.182973	-0.0932747	0.049803	0.051981	0.838188	1
rs4518923	1	6959389	G	0.398284	408	-0.0599713	-0.0646305	0.353454	0.357978	0.679385	1
rs6674104	1	6985320	A	0.00857843	408	-0.0887706	-0.350148	0.799864	0.801698	1	1
rs11809898	1	7002349	A	0.110294	408	0.0619493	0.101192	0.540407	0.544204	0.610936	1
rs1010806	1	7076560	A	0.39951	408	0.0808282	0.065362	0.216226	0.220556	1	1
rs970973	1	7124777	A	0.416667	408	0.074559	0.063684	0.241694	0.246128	0.308547	1
rs1894647	1	7128537	A	0.064951	408	0.0787267	0.132516	0.55245	0.556175	1	1
rs17350046	1	7135594	A	0.00245098	408	0.262342	0.651848	0.687346	0.69012	1	1
rs6680365	1	7159397	A	0.393382	408	-0.142869	-0.063978	0.0255424	0.026953	0.467498	1
rs1304712	1	7193125	G	0.400735	408	-0.00185883	-0.0628469	0.976404	0.976625	0.0803603	1
rs17030589	1	7201363	G	0.0306373	408	0.0656793	0.181772	0.717855	0.720384	0.315514	1
rs6577435	1	7274915	A	0.259804	408	-0.027104	-0.0702285	0.699541	0.702218	0.095323	1
rs2301462	1	7315181	A	0.383578	408	0.116238	0.0671704	0.0835404	0.0864726	0.463501	1
rs4908457	1	7351773	G	0.0428922	408	0.0239308	0.152744	0.875503	0.876659	0.161672	1
rs845204	1	7387873	G	0.279412	408	0.052637	0.0692115	0.446942	0.451207	0.13987	1
rs7537181	1	7389892	G	0.387255	408	-0.0792984	-0.0663383	0.231945	0.236343	1	1
rs12088178	1	7408904	G	0.376225	408	-0.00903538	-0.0655036	0.89029	0.891311	0.673	1
rs1193244	1	7437260	A	0.272059	408	0.00215335	0.0713782	0.975933	0.976158	0.70742	1
rs17445205	1	7446367	A	0.0577396	407	0.158504	0.138504	0.252457	0.256925	1	0.997549
rs1149332	1	7451433	A	0.268382	408	-0.125138	-0.0727273	0.0853138	0.0882788	0.801378	1
rs6682687	1	7501045	A	0.264706	408	0.0195714	0.0703113	0.780741	0.782741	0.16363	1
rs4908646	1	7504580	G	0.265931	408	0.00926586	0.0703239	0.895174	0.89615	0.204473	1
rs12723779	1	7514160	A	0.145833	408	0.029996	0.0910437	0.741802	0.744134	0.843386	1
rs6577449	1	7520681	A	0.0453431	408	-0.0350641	-0.154086	0.819987	0.821644	0.574592	1
rs12407666	1	7523492	A	0.420343	408	0.0299172	0.063348	0.636736	0.639894	0.311428	1
rs12058235	1	7627731	T	0.0637255	408	0.129532	0.135728	0.339906	0.344445	0.392629	1
rs17027053	1	7632895	G	0.139706	408	-0.172121	-0.0921966	0.0619169	0.0643977	1	1
rs12144591	1	7678066	A	0.057598	408	-0.089495	-0.135468	0.508845	0.512819	0.633887	1
rs2301488	1	7714998	A	0.484069	408	-0.0770938	-0.0652335	0.23728	0.241699	0.551862	1
rs875994	1	7775506	G	0.158088	408	-0.08166	-0.0895176	0.361651	0.366162	0.575456	1
rs228641	1	7785486	A	0.0355392	408	0.140153	0.164427	0.394008	0.398449	0.0839204	1
rs228700	1	7811739	G	0.0355392	408	0.140153	0.164427	0.394008	0.398449	0.0839204	1
rs228654	1	7819815	A	0.106618	408	-0.0896572	-0.106066	0.397945	0.402376	0.601157	1
rs500508	1	7850043	A	0.286765	408	0.0819544	0.0681136	0.228898	0.233285	0.11683	1
rs227147	1	7877676	G	0.356618	408	-0.0134355	-0.0671948	0.841521	0.842985	0.914185	1
rs863171	1	7915202	A	0.46683	407	-0.0446445	-0.0649296	0.491715	0.495778	0.765883	0.997549
rs2050198	1	8034426	C	0.223039	408	-0.0154129	-0.0727276	0.832164	0.833712	0.0149385	1
rs7545677	1	8088206	A	0.241422	408	-0.00334791	-0.07156	0.962685	0.963034	0.0577895	1
rs7542367	1	8121850	G	0.156863	408	-0.146952	-0.0895665	0.100858	0.104088	0.574381	1
rs17032305	1	8193077	G	0.0306373	408	0.128566	0.190006	0.498634	0.502662	1	1
rs10399665	1	8329874	G	0.394608	408	0.091889	0.0619398	0.137936	0.14166	0.0173795	1
rs10779702	1	8346097	A	0.323529	408	-0.158035	-0.0672826	0.0188328	0.0199739	0.650762	1
rs10864360	1	8647109	G	0.355392	408	0.0941895	0.0650451	0.147599	0.151427	0.16119	1
rs10864361	1	8649308	A	0.352941	408	0.0890188	0.0648579	0.169902	0.173933	0.128985	1
rs2038903	1	8839104	A	0.441032	407	0.00375956	0.0646471	0.953625	0.954059	1	0.997549
rs1409147	1	8927907	A	0.343137	408	-0.0153132	-0.0689899	0.824343	0.82596	0.441825	1
rs2274327	1	8931993	A	0.383578	408	-0.00771376	-0.0674959	0.909012	0.90986	0.463501	1
rs6577546	1	8961609	G	0.283088	408	-0.0250851	-0.0741725	0.735213	0.7376	0.113896	1
rs7513804	1	8967711	G	0.41299	408	-0.00976743	-0.0670603	0.884196	0.885273	0.306901	1
rs4908803	1	8982757	G	0.330882	408	0.0453309	0.0676572	0.502852	0.506858	0.654505	1
rs6685329	1	9016716	G	0.392157	408	0.0891229	0.0631317	0.158039	0.161967	0.145687	1
rs17033225	1	9053114	A	0.0416667	408	0.123018	0.163792	0.452616	0.456858	1	1
rs12239636	1	9078288	A	0.0208333	408	-0.0661658	-0.226991	0.770676	0.772763	1	1
rs6577556	1	9141970	G	0.3125	408	0.0158924	0.0684677	0.816448	0.818136	0.644908	1
rs11802925	1	9151211	G	0.0833333	408	-0.0368665	-0.119417	0.757534	0.759733	0.340428	1
rs1009940	1	9200729	G	0.410539	408	-0.00622153	-0.0619627	0.920021	0.920767	0.0405661	1
rs10489436	1	9208308	G	0.110294	408	-0.100205	-0.100092	0.316764	0.321315	0.308879	1
rs2268175	1	9223195	G	0.373775	408	-0.0453155	-0.0703342	0.519389	0.523306	0.0260833	1
rs2239560	1	9227318	A	0.155637	408	-0.121805	-0.089847	0.175196	0.17927	0.574629	1
rs732950	1	9232333	A	0.36855	407	-0.0305851	-0.070404	0.663982	0.666936	0.0332265	0.997549
rs9434755	1	9259349	G	0.214109	404	-0.162935	-0.0784369	0.0377764	0.0396065	1	0.990196
rs11121371	1	9315315	G	0.169118	408	0.0416261	0.0818581	0.611092	0.614433	0.0757097	1
rs9660890	1	9420700	G	0.229167	408	-0.0650992	-0.0759046	0.391088	0.395538	0.674232	1
rs7533271	1	9485902	G	0.189951	408	0.017213	0.0815184	0.832766	0.834309	0.873246	1
rs7412149	1	9502551	A	0.511029	408	-0.062776	-0.0647155	0.332032	0.336577	0.8429	1
rs12040542	1	9514086	G	0.128676	408	0.0839279	0.0944862	0.374403	0.378891	0.513221	1
rs12037667	1	9517257	C	0.128676	408	0.0839279	0.0944862	0.374403	0.378891	0.513221	1
rs6540991	1	9640674	G	0.300245	408	0.0241547	0.0706881	0.73257	0.734979	0.724733	1
rs6666059	1	9645110	C	0.0784314	408	-0.160578	-0.122558	0.190121	0.194302	0.494742	1
rs1660742	1	9804552	G	0.0784314	408	-0.123293	-0.120081	0.304542	0.309091	1	1
rs6699320	1	9810215	G	0.067402	408	-0.0946276	-0.129853	0.466166	0.47035	1	1
rs6683452	1	9952500	A	0.0759804	408	0.111472	0.122296	0.362035	0.366546	1	1
rs11121515	1	10048352	A	0.0514706	408	0.312628	0.142639	0.0283986	0.0299144	0.285446	1
rs6685910	1	10118557	A	0.0821078	408	0.0411912	0.120603	0.732695	0.735102	0.502728	1
rs6670208	1	10175254	A	0.276961	408	-0.0493022	-0.0706252	0.485126	0.489221	0.536257	1
rs17396340	1	10208763	A	0.121324	408	-0.0547328	-0.0992759	0.581414	0.584956	0.817239	1
rs17034615	1	10234464	A	0.0490196	408	-0.110759	-0.144855	0.444499	0.448773	0.247034	1
rs3753037	1	10278421	A	0.259804	408	-0.0485695	-0.0725457	0.503175	0.507179	0.700124	1
rs17401966	1	10308058	G	0.265931	408	-0.0352002	-0.0721562	0.625668	0.628906	0.799754	1
rs17034775	1	10321595	A	0.0490196	408	-0.110759	-0.144855	0.444499	0.448773	0.247034	1
rs11121543	1	10326770	A	0.0281863	408	0.124615	0.196736	0.526463	0.530341	1	1
rs12403443	1	10346575	G	0.290441	408	0.0174994	0.0685401	0.798478	0.800324	0.186628	1
rs11121552	1	10357911	A	0.265931	408	-0.0352002	-0.0721562	0.625668	0.628906	0.799754	1
rs17034849	1	10371183	A	0.0171569	408	2.10713e-05	0.249509	0.999933	0.999933	1	1
rs6674843	1	10380965	A	0.265931	408	-0.0383047	-0.0720664	0.595058	0.59851	0.799754	1
rs1889309	1	10402265	A	0.268382	408	-0.0348104	-0.0721345	0.629397	0.632609	0.899697	1
rs585870	1	10472215	C	0.285539	408	-0.0686528	-0.0718615	0.339401	0.343941	0.809117	1
rs2506878	1	10488682	C	0.172794	408	0.0388407	0.0808577	0.630973	0.634173	0.0548302	1
rs616488	1	10488802	G	0.320639	407	-0.046949	-0.0696164	0.50006	0.504081	0.909614	0.997549
rs17412703	1	10489415	A	0.0796569	408	0.00550888	0.114715	0.961699	0.962057	0.161465	1
rs17035156	1	10508114	A	0.153186	408	0.00901553	0.0847648	0.915297	0.916087	0.0533808	1
rs12403130	1	10514818	C	0.130221	407	0.0267565	0.091494	0.76995	0.772044	0.0788753	0.997549
rs12038548	1	10565784	A	0.116422	408	-0.115611	-0.101976	0.256919	0.261399	0.630871	1
rs12045923	1	10566416	G	0.338235	408	0.0472975	0.0678085	0.485479	0.489573	1	1
rs190775	1	10606270	A	0.134804	408	0.0610484	0.0922229	0.507993	0.511972	0.522069	1
rs17035482	1	10613535	A	0.064951	408	0.0744652	0.127104	0.557969	0.56166	0.23396	1
rs11587145	1	10627275	A	0.128676	408	-0.103848	-0.09332	0.26579	0.27029	0.373005	1
rs483296	1	10667710	A	0.428571	406	-0.104016	-0.062252	0.094744	0.0978743	0.0859057	0.995098
rs7514663	1	10684936	A	0.00617284	405	0.512009	0.412421	0.214432	0.218753	1	0.992647
rs7514751	1	10685019	A	0.286765	408	0.00326438	0.0694812	0.962527	0.962878	0.398327	1
rs284289	1	10686402	G	0.046683	407	0.256815	0.147341	0.0813344	0.084225	0.211692	0.997549
rs12567505	1	10687970	A	0.067402	408	0.311171	0.127139	0.0143857	0.0153263	0.702113	1
rs4845952	1	10689966	A	0.127451	408	0.240489	0.0924724	0.00930452	0.00998594	0.176381	1
rs284254	1	10708901	G	0.0661765	408	0.272224	0.127629	0.0329306	0.0346038	0.691921	1
rs284277	1	10713384	C	0.394608	408	0.116151	0.0657592	0.0773432	0.080156	1	1
rs880315	1	10719453	G	0.362745	408	0.0838483	0.0670696	0.211238	0.215543	0.915104	1
rs11121621	1	10770647	A	0.156863	408	-0.00437362	-0.0890578	0.960832	0.961198	0.851701	1
rs1769669	1	10795969	A	0.198529	408	0.0769901	0.0828969	0.353021	0.357545	0.274762	1
rs1292664	1	10827952	A	0.242647	408	0.0188216	0.0737431	0.798544	0.800389	0.590809	1
rs12085982	1	10835734	G	0.215686	408	0.0469474	0.079123	0.552949	0.556671	0.661022	1
rs667444	1	10838094	G	0.382353	408	-0.00123328	-0.0671082	0.985338	0.985475	0.601986	1
rs1280992	1	10844877	A	0.317402	408	-0.0104456	-0.068936	0.879561	0.88068	1	1
rs1884429	1	11035423	A	0.216912	408	0.0118677	0.0775371	0.878352	0.879482	0.772296	1
rs1194820	1	11051846	A	0.240196	408	0.0550026	0.0731539	0.452126	0.45637	0.223497	1
rs2791653	1	11052435	A	0.215686	408	0.0117009	0.0775946	0.880137	0.88125	0.769962	1
rs910660	1	11053230	A	0.240196	408	0.0550026	0.0731539	0.452126	0.45637	0.223497	1
rs1010447	1	11192383	A	0.243873	408	-0.00684113	-0.0739741	0.926317	0.927004	0.686813	1
rs10779751	1	11206923	A	0.243873	408	-0.00684113	-0.0739741	0.926317	0.927004	0.686813	1
rs2295080	1	11245215	C	0.269608	408	0.0320734	0.0701993	0.64775	0.650827	0.207851	1
rs11121717	1	11278036	G	0.0367647	408	0.0925978	0.167514	0.580416	0.583964	0.424901	1
rs2817644	1	11570256	A	0.0882353	408	-0.203987	-0.114616	0.0751164	0.0778846	0.756368	1
rs714829	1	11574497	G	0.106618	408	0.126841	0.105847	0.230782	0.235176	0.601157	1
rs12760507	1	11618904	A	0.0502451	408	0.170915	0.146603	0.24368	0.248121	1	1
chr1:11717263	1	11717263	A	0.137592	407	-0.00322331	-0.0938485	0.972601	0.972858	1	0.997549
chr1:11719611	1	11719611	A	0.394608	408	0.0491638	0.0656618	0.454012	0.458248	0.917703	1
chr1:11719821	1	11719821	G	0.21201	408	-0.0375957	-0.079292	0.635399	0.638566	0.768225	1
chr1:11721322	1	11721322	T	0.303922	408	-0.0805225	-0.0711066	0.257458	0.261939	0.415218	1
chr1:11721815	1	11721815	A	0.346437	407	0.0164114	0.0671092	0.806806	0.808579	0.826761	0.997549
chr1:11722635	1	11722635	A	0.159314	408	0.0601037	0.0847944	0.478438	0.482565	0.193626	1
chr1:11723065	1	11723065	C	0.354167	408	0.054077	0.0666326	0.417038	0.421412	0.913777	1
rs4073395	1	11723290	A	0.306373	408	-0.0691923	-0.0712402	0.331422	0.335968	0.352607	1
chr1:11723610	1	11723610	G	0.183047	407	-0.0216974	-0.0828695	0.793456	0.795346	0.868977	0.997549
chr1:11723674	1	11723674	A	0.305147	408	-0.0769676	-0.0711624	0.279441	0.283966	0.41373	1
chr1:11724004	1	11724004	G	0.00122549	408	0.412778	0.923045	0.654737	0.657761	1	1
chr1:11724229	1	11724229	A	0.345588	408	0.0510626	0.0668747	0.445132	0.449404	0.826648	1
chr1:11725021	1	11725021	C	0.34398	407	0.0211531	0.0669207	0.751933	0.75418	0.662139	0.997549
chr1:11725538	1	11725538	C	0.311275	408	-0.0789103	-0.071403	0.269099	0.273606	0.247794	1
chr1:11727177	1	11727177	C	0.104167	408	0.100398	0.105486	0.341216	0.345754	1	1
chr1:11729438	1	11729438	C	0.158088	408	0.0668841	0.0849829	0.431264	0.435589	0.189753	1
chr1:11730013	1	11730013	G	0.34398	407	0.021395	0.0680344	0.753161	0.755398	0.912497	0.997549
chr1:11730557	1	11730557	G	0.184275	407	-0.0280057	-0.0827733	0.735105	0.737493	1	0.997549
chr1:11731748	1	11731748	A	0.175309	405	-0.0632059	-0.0855846	0.460199	0.464408	0.731986	0.992647
chr1:11732322	1	11732322	A	0.493873	408	-0.0712631	-0.0655732	0.277138	0.281659	0.428085	1
chr1:11732387	1	11732387	A	0.00122549	408	0.412778	0.923045	0.654737	0.657761	1	1
chr1:11732432	1	11732432	G	0.310345	406	-0.0666297	-0.0712121	0.349453	0.353982	0.416633	0.995098
chr1:11733092	1	11733092	A	0.151961	408	0.0644397	0.0856784	0.451984	0.456228	0.0833896	1
chr1:11733560	1	11733560	A	0.344363	408	0.0402788	0.0668291	0.5467	0.55046	0.742376	1
rs4075033	1	11733821	G	0.319853	408	-0.0965897	-0.0700408	0.16788	0.171895	0.427438	1
chr1:11733860	1	11733860	C	0.183047	407	-0.0216974	-0.0828695	0.793456	0.795346	0.868977	0.997549
chr1:11733870	1	11733870	G	0.3125	408	-0.0654677	-0.0706287	0.353964	0.358487	0.420764	1
chr1:11734371	1	11734371	A	0.159314	408	0.051541	0.0848572	0.543595	0.547374	0.193626	1
chr1:11735282	1	11735282	A	0.0171569	408	0.143471	0.249305	0.564965	0.568613	1	1
chr1:11735428	1	11735428	A	0.00122549	408	0.412778	0.923045	0.654737	0.657761	1	1
chr1:11736371	1	11736371	C	0.160539	408	0.0634467	0.0847429	0.45404	0.458276	0.199009	1
chr1:11737218	1	11737218	G	0.311275	408	-0.0655003	-0.0710101	0.356316	0.360835	0.355335	1
chr1:11737951	1	11737951	A	0.156863	408	0.0680074	0.0851365	0.424404	0.428753	0.135653	1
chr1:11741330	1	11741330	A	0.0122549	408	-0.124265	-0.293186	0.671679	0.674575	1	1
chr1:11745182	1	11745182	A	0.156863	408	-0.0787002	-0.0856444	0.358139	0.362656	0.262125	1
chr1:11745321	1	11745321	A	0.269042	407	-0.109756	-0.071187	0.123123	0.12667	0.529083	0.997549
chr1:11745743	1	11745743	G	0.327206	408	-0.118704	-0.0689266	0.0850363	0.0879962	0.73722	1
chr1:11746720	1	11746720	A	0.35049	408	0.0943968	0.0676049	0.162623	0.166593	0.913369	1
chr1:11746890	1	11746890	A	0.330882	408	0.0487343	0.0702939	0.488125	0.492206	0.316598	1
chr1:11746933	1	11746933	G	0.335784	408	0.0446664	0.0697139	0.521711	0.525616	0.437112	1
chr1:11747143	1	11747143	A	0.33701	408	0.0395306	0.069839	0.571377	0.574984	0.376187	1
chr1:11747162	1	11747162	A	0.278186	408	0.00973826	0.0746723	0.896239	0.897205	0.21693	1
chr1:11747165	1	11747165	G	0.334559	408	0.041678	0.0701111	0.552206	0.555933	0.319273	1
chr1:11747208	1	11747208	A	0.334559	408	0.041678	0.0701111	0.552206	0.555933	0.319273	1
chr1:11747722	1	11747722	A	0.00245098	408	-0.209329	-0.648542	0.746871	0.74916	1	1
chr1:11748131	1	11748131	G	0.0882353	408	-0.00244091	-0.111571	0.982546	0.982709	0.538831	1
chr1:11748229	1	11748229	C	0.3125	408	0.0290103	0.0681801	0.670476	0.673381	0.489363	1
chr1:11748438	1	11748438	C	0.309877	405	0.0322535	0.06866	0.638528	0.641673	0.48595	0.992647
chr1:11748672	1	11748672	A	0.0392157	408	-0.172262	-0.158343	0.276638	0.281159	0.11919	1
chr1:11750825	1	11750825	G	0.30665	406	0.0240941	0.0680562	0.723315	0.7258	0.292956	0.995098
chr1:11750906	1	11750906	G	0.307598	408	0.0257398	0.067884	0.704559	0.707196	0.297608	1
chr1:11752756	1	11752756	G	0.104167	408	-0.0811874	-0.104297	0.436317	0.440623	0.788661	1
chr1:11752767	1	11752767	T	0.137255	408	-0.098632	-0.0928873	0.288306	0.292842	0.835411	1
chr1:11754182	1	11754182	A	0.0551471	408	0.285504	0.143987	0.0473843	0.0494965	0.623381	1
chr1:11754202	1	11754202	G	0.279412	408	0.0711509	0.0716809	0.320902	0.325452	1	1
chr1:11754462	1	11754462	G	0.101716	408	-0.0725587	-0.106511	0.495727	0.499769	1	1
chr1:11754687	1	11754687	A	0.375921	407	0.0299258	0.0673278	0.656696	0.659706	0.672565	0.997549
chr1:11754876	1	11754876	A	0.174447	407	-0.0050538	-0.0860474	0.953165	0.953603	0.732296	0.997549
chr1:11755210	1	11755210	C	0.0551471	408	0.285504	0.143987	0.0473843	0.0494965	0.623381	1
chr1:11755246	1	11755246	G	0.176471	408	0.00708292	0.0849511	0.933552	0.934173	1	1
chr1:11755953	1	11755953	A	0.376225	408	0.0305249	0.067267	0.649982	0.653043	0.598984	1
chr1:11756078	1	11756078	G	0.376225	408	0.0305249	0.067267	0.649982	0.653043	0.598984	1
chr1:11756443	1	11756443	A	0.101716	408	-0.0725587	-0.106511	0.495727	0.499769	1	1
chr1:11756497	1	11756497	A	0.376225	408	0.0305249	0.067267	0.649982	0.653043	0.598984	1
chr1:11757041	1	11757041	G	0.376225	408	0.0305249	0.067267	0.649982	0.653043	0.598984	1
chr1:11757352	1	11757352	A	0.275184	407	0.0737701	0.0730514	0.312572	0.317123	0.710276	0.997549
chr1:11758042	1	11758042	C	0.101716	408	-0.0725587	-0.106511	0.495727	0.499769	1	1
chr1:11758143	1	11758143	A	0.101716	408	-0.0725587	-0.106511	0.495727	0.499769	1	1
chr1:11758522	1	11758522	A	0.27451	408	0.070091	0.0729768	0.336826	0.341368	0.710729	1
chr1:11759037	1	11759037	G	0.176471	408	0.00708292	0.0849511	0.933552	0.934173	1	1
chr1:11759215	1	11759215	A	0.272727	407	0.0632552	0.0735214	0.389588	0.394041	0.618805	0.997549
chr1:11759257	1	11759257	A	0.101716	408	-0.0725587	-0.106511	0.495727	0.499769	1	1
chr1:11759269	1	11759269	G	0.376225	408	0.0305249	0.067267	0.649982	0.653043	0.598984	1
chr1:11759455	1	11759455	A	0.27451	408	0.070091	0.0729768	0.336826	0.341368	0.710729	1
chr1:11759635	1	11759635	C	0.27451	408	0.070091	0.0729768	0.336826	0.341368	0.710729	1
chr1:11760292	1	11760292	A	0.376225	408	0.0305249	0.067267	0.649982	0.653043	0.598984	1
chr1:11760345	1	11760345	C	0.0612745	408	0.274559	0.137654	0.0460909	0.0481672	0.385272	1
chr1:11760598	1	11760598	A	0.272727	407	0.0632552	0.0735214	0.389588	0.394041	0.618805	0.997549
chr1:11760686	1	11760686	A	0.272727	407	0.0632552	0.0735214	0.389588	0.394041	0.618805	0.997549
chr1:11760965	1	11760965	G	0.101966	407	-0.0705338	-0.106565	0.508045	0.512024	1	0.997549
chr1:11761038	1	11761038	A	0.101716	408	-0.0725587	-0.106511	0.495727	0.499769	1	1
chr1:11761103	1	11761103	A	0.101716	408	-0.0725587	-0.106511	0.495727	0.499769	1	1
chr1:11761143	1	11761143	C	0.0612745	408	0.274559	0.137654	0.0460909	0.0481672	0.385272	1
chr1:11761283	1	11761283	G	0.101966	407	-0.0726529	-0.106666	0.495793	0.499835	1	0.997549
chr1:11761349	1	11761349	A	0.0661765	408	-0.0241803	-0.130996	0.853552	0.854908	1	1
chr1:11761428	1	11761428	G	0.101716	408	-0.0725587	-0.106511	0.495727	0.499769	1	1
chr1:11761596	1	11761596	A	0.101716	408	-0.0725587	-0.106511	0.495727	0.499769	1	1
chr1:11761795	1	11761795	A	0.0612745	408	0.274559	0.137654	0.0460909	0.0481672	0.385272	1
chr1:11761813	1	11761813	G	0.0661765	408	-0.0241803	-0.130996	0.853552	0.854908	1	1
chr1:11762379	1	11762379	G	0.101716	408	-0.0725587	-0.106511	0.495727	0.499769	1	1
chr1:11762510	1	11762510	A	0.13848	408	-0.0706879	-0.090661	0.435571	0.439879	0.403403	1
rs4846044	1	11762585	A	0.0367647	408	-0.0666104	-0.174024	0.701894	0.704552	1	1
chr1:11762967	1	11762967	A	0.375	408	0.0293385	0.0675678	0.664137	0.667091	0.526702	1
chr1:11763054	1	11763054	A	0.060049	408	0.273051	0.138848	0.0492354	0.0513981	0.383577	1
chr1:11763070	1	11763070	C	0.0661765	408	0.216509	0.121131	0.0738733	0.076616	0.0235082	1
chr1:11763449	1	11763449	G	0.273284	408	0.0683892	0.0729824	0.348725	0.353255	0.803291	1
chr1:11763567	1	11763567	A	0.101716	408	-0.0725587	-0.106511	0.495727	0.499769	1	1
chr1:11764276	1	11764276	A	0.175676	407	0.00529938	0.0851873	0.950397	0.95086	1	0.997549
chr1:11764731	1	11764731	G	0.375	408	0.0293385	0.0675678	0.664137	0.667091	0.526702	1
chr1:11765078	1	11765078	A	0.174447	407	-0.0050538	-0.0860474	0.953165	0.953603	0.732296	0.997549
chr1:11765811	1	11765811	A	0.0465686	408	-0.133189	-0.147346	0.366038	0.370542	0.210892	1
chr1:11766219	1	11766219	C	0.276413	407	0.0786135	0.071599	0.272218	0.276731	0.805033	0.997549
chr1:11766270	1	11766270	A	0.101716	408	-0.0725587	-0.106511	0.495727	0.499769	1	1
chr1:11766427	1	11766427	A	0.060049	408	0.273051	0.138848	0.0492354	0.0513981	0.383577	1
chr1:11766801	1	11766801	A	0.181373	408	0.0114838	0.0830671	0.890045	0.891068	0.867415	1
chr1:11767324	1	11767324	G	0.101716	408	-0.0725587	-0.106511	0.495727	0.499769	1	1
chr1:11768111	1	11768111	A	0.101716	408	-0.0725587	-0.106511	0.495727	0.499769	1	1
chr1:11770023	1	11770023	G	0.060049	408	0.273051	0.138848	0.0492354	0.0513981	0.383577	1
chr1:11770346	1	11770346	G	0.378676	408	0.0104311	0.0660459	0.874506	0.875671	0.916407	1
chr1:11770448	1	11770448	A	0.101716	408	-0.0725587	-0.106511	0.495727	0.499769	1	1
chr1:11770489	1	11770489	A	0.101716	408	-0.0725587	-0.106511	0.495727	0.499769	1	1
rs1537514	1	11770655	C	0.101716	408	-0.0725587	-0.106511	0.495727	0.499769	1	1
chr1:11770726	1	11770726	A	0.1875	408	-0.0364995	-0.0835422	0.662184	0.665153	0.746924	1
chr1:11770730	1	11770730	A	0.00490196	408	0.624099	0.458688	0.173634	0.177696	1	1
chr1:11772952	1	11772952	A	0.332108	408	-0.0434185	-0.0714392	0.543341	0.547121	0.0936706	1
chr1:11773514	1	11773514	A	0.0355392	408	-0.135242	-0.164665	0.411466	0.415858	0.0839204	1
chr1:11773590	1	11773590	C	0.281863	408	-0.0239548	-0.0729322	0.742569	0.744895	0.463554	1
chr1:11773772	1	11773772	A	0.0404412	408	0.206916	0.166884	0.215018	0.219342	1	1
chr1:11774697	1	11774697	A	0.101716	408	-0.0725587	-0.106511	0.495727	0.499769	1	1
chr1:11774887	1	11774887	A	0.276961	408	-0.0282603	-0.0738127	0.70182	0.704479	0.324061	1
chr1:11775485	1	11775485	C	0.0245098	408	-0.147806	-0.199657	0.459118	0.463333	0.212244	1
rs1801131	1	11777063	C	0.321078	408	-0.020998	-0.0734589	0.774995	0.777045	0.0126961	1
chr1:11777258	1	11777258	A	0.254902	408	0.00362717	0.0755218	0.961694	0.962052	0.434065	1
chr1:11777342	1	11777342	G	0.392157	408	-0.0102133	-0.068173	0.880911	0.882018	0.17797	1
chr1:11778454	1	11778454	G	0.386029	408	-0.0131355	-0.0677903	0.846359	0.847779	0.348082	1
chr1:11778484	1	11778484	C	0.0551471	408	0.185981	0.144767	0.198899	0.203135	0.623381	1
chr1:11778965	1	11778965	A	0.307598	408	0.077152	0.0699475	0.270027	0.274536	0.816097	1
rs17421462	1	11779434	A	0.0563725	408	0.169989	0.143298	0.23552	0.239932	0.628222	1
rs1572151	1	11780298	G	0.0563725	408	0.171075	0.143292	0.23252	0.236921	0.628222	1
chr1:11780375	1	11780375	A	0.175245	408	-0.00918324	-0.0858001	0.914765	0.915559	0.732137	1
chr1:11780538	1	11780538	A	0.38848	408	-0.0342941	-0.0683233	0.61571	0.619019	0.210776	1
chr1:11780911	1	11780911	A	0.10049	408	-0.0768496	-0.106968	0.472487	0.476642	1	1
chr1:11781137	1	11781137	A	0.174447	407	-0.0124713	-0.0868046	0.88576	0.886822	0.493145	0.997549
chr1:11781171	1	11781171	G	0.0526961	408	-0.14413	-0.148163	0.33066	0.335207	0.616366	1
chr1:11781977	1	11781977	G	0.0526961	408	-0.14413	-0.148163	0.33066	0.335207	0.616366	1
chr1:11782193	1	11782193	C	0.0526961	408	-0.14413	-0.148163	0.33066	0.335207	0.616366	1
chr1:11782223	1	11782223	A	0.0526961	408	-0.14413	-0.148163	0.33066	0.335207	0.616366	1
chr1:11782704	1	11782704	G	0.10049	408	-0.0768496	-0.106968	0.472487	0.476642	1	1
chr1:11782707	1	11782707	A	0.22973	407	0.0398392	0.0774704	0.607077	0.610446	0.77963	0.997549
chr1:11783045	1	11783045	A	0.175245	408	-0.000915992	-0.0858296	0.991485	0.991565	0.732137	1
rs13306567	1	11783052	C	0.0526961	408	-0.14413	-0.148163	0.33066	0.335207	0.616366	1
chr1:11783270	1	11783270	A	0.231618	408	0.0482368	0.0767621	0.529746	0.533605	0.889746	1
chr1:11783430	1	11783430	A	0.153186	408	-0.103961	-0.0883997	0.239583	0.24401	0.848846	1
rs17037397	1	11784750	A	0.0343137	408	-0.148129	-0.167035	0.375179	0.379665	0.0737872	1
chr1:11784801	1	11784801	G	0.279412	408	-0.0327903	-0.0736624	0.656217	0.65923	0.390342	1
rs17367504	1	11785365	G	0.151961	408	-0.100157	-0.0885804	0.258186	0.262669	0.847208	1
chr1:11785644	1	11785644	A	0.0992647	408	-0.071111	-0.107263	0.507357	0.511339	1	1
chr1:11787823	1	11787823	A	0.0995086	407	-0.0690776	-0.107317	0.519784	0.523699	1	0.997549
chr1:11788129	1	11788129	C	0.0992647	408	-0.071111	-0.107263	0.507357	0.511339	1	1
chr1:11788391	1	11788391	G	0.150735	408	-0.0922816	-0.0887643	0.298514	0.303059	0.702415	1
chr1:11788770	1	11788770	A	0.0514706	408	-0.123595	-0.149685	0.408973	0.413372	0.614275	1
chr1:11789038	1	11789038	A	0.0343137	408	-0.148129	-0.167035	0.375179	0.379665	0.0737872	1
chr1:11789631	1	11789631	A	0.238971	408	0.0381687	0.0745351	0.608587	0.611946	0.682707	1
chr1:11789767	1	11789767	C	0.00245098	408	-1.12527	-0.648057	0.0824976	0.0854103	1	1
chr1:11790239	1	11790239	C	0.0343137	408	-0.149206	-0.179693	0.406347	0.410754	1	1
chr1:11790465	1	11790465	A	0.0343137	408	-0.149206	-0.179693	0.406347	0.410754	1	1
chr1:11791098	1	11791098	G	0.0992647	408	-0.071111	-0.107263	0.507357	0.511339	1	1
chr1:11791817	1	11791817	G	0.372549	408	-0.0174065	-0.0666227	0.793885	0.795771	1	1
chr1:11792102	1	11792102	C	0.239558	407	0.0382079	0.0747031	0.609026	0.612382	0.682982	0.997549
chr1:11792165	1	11792165	A	0.238971	408	0.0381687	0.0745351	0.608587	0.611946	0.682707	1
chr1:11792440	1	11792440	G	0.0992647	408	-0.071111	-0.107263	0.507357	0.511339	1	1
chr1:11792720	1	11792720	G	0.0992647	408	-0.071111	-0.107263	0.507357	0.511339	1	1
chr1:11792828	1	11792828	G	0.0784314	408	-0.0959722	-0.118139	0.41658	0.420955	0.726909	1
chr1:11792866	1	11792866	G	0.0453431	408	0.154159	0.157857	0.328782	0.333329	1	1
rs17037425	1	11792970	A	0.133578	408	-0.0903752	-0.0914219	0.322883	0.327433	0.280614	1
chr1:11793318	1	11793318	A	0.0992647	408	-0.071111	-0.107263	0.507357	0.511339	1	1
chr1:11793700	1	11793700	A	0.095297	404	-0.0524383	-0.10927	0.631302	0.634499	0.773024	0.990196
chr1:11793853	1	11793853	A	0.0992647	408	-0.071111	-0.107263	0.507357	0.511339	1	1
chr1:11794362	1	11794362	G	0.0995086	407	-0.0690776	-0.107317	0.519784	0.523699	1	0.997549
chr1:11794907	1	11794907	G	0.0992647	408	-0.071111	-0.107263	0.507357	0.511339	1	1
chr1:11794982	1	11794982	G	0.0982801	407	-0.0816992	-0.107681	0.448023	0.452284	1	0.997549
chr1:11795243	1	11795243	A	0.0985222	406	-0.069312	-0.107951	0.520828	0.524737	1	0.995098
chr1:11795407	1	11795407	A	0.0514706	408	-0.123595	-0.149685	0.408973	0.413372	0.614275	1
chr1:11795607	1	11795607	G	0.0992647	408	-0.071111	-0.107263	0.507357	0.511339	1	1
chr1:11795642	1	11795642	A	0.0992647	408	-0.071111	-0.107263	0.507357	0.511339	1	1
chr1:11796374	1	11796374	G	0.150735	408	-0.0922816	-0.0887643	0.298514	0.303059	0.702415	1
chr1:11796438	1	11796438	G	0.390931	408	-0.0307036	-0.067357	0.64851	0.651581	0.406094	1
chr1:11796456	1	11796456	C	0.389435	407	-0.0186449	-0.0673894	0.78203	0.784019	0.467	0.997549
chr1:11796741	1	11796741	C	0.0992647	408	-0.071111	-0.107263	0.507357	0.511339	1	1
chr1:11796776	1	11796776	A	0.0992647	408	-0.071111	-0.107263	0.507357	0.511339	1	1
chr1:11799004	1	11799004	G	0.38848	408	-0.018524	-0.0671739	0.782731	0.784714	0.531652	1
chr1:11799249	1	11799249	A	0.064951	408	-0.0152239	-0.131892	0.908107	0.908963	1	1
chr1:11799649	1	11799649	A	0.0514706	408	-0.123595	-0.149685	0.408973	0.413372	0.614275	1
chr1:11799718	1	11799718	T	0.0514706	408	-0.123595	-0.149685	0.408973	0.413372	0.614275	1
chr1:11800233	1	11800233	A	0.0514706	408	-0.123595	-0.149685	0.408973	0.413372	0.614275	1
chr1:11800566	1	11800566	C	0.0514706	408	-0.123595	-0.149685	0.408973	0.413372	0.614275	1
chr1:11800813	1	11800813	A	0.0514706	408	-0.123595	-0.149685	0.408973	0.413372	0.614275	1
chr1:11801206	1	11801206	G	0.0992647	408	-0.071111	-0.107263	0.507357	0.511339	1	1
chr1:11801653	1	11801653	C	0.0514706	408	-0.123595	-0.149685	0.408973	0.413372	0.614275	1
chr1:11801690	1	11801690	G	0.0514706	408	-0.123595	-0.149685	0.408973	0.413372	0.614275	1
chr1:11801947	1	11801947	A	0.0992647	408	-0.071111	-0.107263	0.507357	0.511339	1	1
chr1:11802055	1	11802055	A	0.0514706	408	-0.123595	-0.149685	0.408973	0.413372	0.614275	1
chr1:11802272	1	11802272	A	0.387255	408	-0.0389859	-0.0681921	0.567521	0.571152	0.212179	1
chr1:11803907	1	11803907	G	0.237745	408	0.0421255	0.074536	0.571958	0.575561	0.58594	1
chr1:11804314	1	11804314	A	0.0343137	408	-0.148129	-0.167035	0.375179	0.379665	0.0737872	1
chr1:11804534	1	11804534	C	0.150735	408	-0.0922816	-0.0887643	0.298514	0.303059	0.702415	1
chr1:11805219	1	11805219	C	0.0992647	408	-0.071111	-0.107263	0.507357	0.511339	1	1
chr1:11806310	1	11806310	G	0.00367647	408	-0.717197	-0.531515	0.177226	0.181316	1	1
rs12567136	1	11806318	A	0.150735	408	-0.0922816	-0.0887643	0.298514	0.303059	0.702415	1
chr1:11806734	1	11806734	G	0.0343137	408	-0.148129	-0.167035	0.375179	0.379665	0.0737872	1
chr1:11807206	1	11807206	A	0.0514706	408	-0.123595	-0.149685	0.408973	0.413372	0.614275	1
chr1:11807467	1	11807467	G	0.00245098	408	-1.12527	-0.648057	0.0824976	0.0854103	1	1
chr1:11808234	1	11808234	G	0.150735	408	-0.0922816	-0.0887643	0.298514	0.303059	0.702415	1
chr1:11809286	1	11809286	A	0.0514706	408	-0.123595	-0.149685	0.408973	0.413372	0.614275	1
chr1:11809391	1	11809391	A	0.064951	408	-0.0152239	-0.131892	0.908107	0.908963	1	1
chr1:11809400	1	11809400	A	0.0992647	408	-0.071111	-0.107263	0.507357	0.511339	1	1
rs7537765	1	11809890	G	0.150735	408	-0.0922816	-0.0887643	0.298514	0.303059	0.702415	1
chr1:11809903	1	11809903	A	0.0982801	407	-0.0588863	-0.107711	0.584581	0.588102	1	0.997549
chr1:11809969	1	11809969	G	0.150735	408	-0.0922816	-0.0887643	0.298514	0.303059	0.702415	1
chr1:11810648	1	11810648	A	0.0343137	408	-0.148129	-0.167035	0.375179	0.379665	0.0737872	1
chr1:11810660	1	11810660	A	0.0281863	408	-0.210198	-0.18911	0.266348	0.270849	0.27304	1
chr1:11811510	1	11811510	G	0.0514706	408	-0.123595	-0.149685	0.408973	0.413372	0.614275	1
chr1:11811800	1	11811800	C	0.0514706	408	-0.123595	-0.149685	0.408973	0.413372	0.614275	1
chr1:11811812	1	11811812	A	0.0343137	408	-0.148129	-0.167035	0.375179	0.379665	0.0737872	1
chr1:11812055	1	11812055	G	0.38848	408	-0.018524	-0.0671739	0.782731	0.784714	0.531652	1
chr1:11812155	1	11812155	G	0.0514706	408	-0.123595	-0.149685	0.408973	0.413372	0.614275	1
chr1:11812443	1	11812443	G	0.0514706	408	-0.123595	-0.149685	0.408973	0.413372	0.614275	1
chr1:11812692	1	11812692	A	0.0503686	407	-0.151065	-0.15114	0.317549	0.3221	0.613184	0.997549
chr1:11812791	1	11812791	G	0.0992647	408	-0.071111	-0.107263	0.507357	0.511339	1	1
chr1:11812977	1	11812977	A	0.0514706	408	-0.123595	-0.149685	0.408973	0.413372	0.614275	1
chr1:11813261	1	11813261	C	0.177696	408	0.0155293	0.0840279	0.853377	0.854734	1	1
chr1:11814144	1	11814144	A	0.0514706	408	-0.123595	-0.149685	0.408973	0.413372	0.614275	1
chr1:11814213	1	11814213	G	0.0245098	408	-0.140806	-0.20977	0.502066	0.506076	1	1
chr1:11814542	1	11814542	A	0.0514706	408	-0.123595	-0.149685	0.408973	0.413372	0.614275	1
chr1:11814589	1	11814589	G	0.0517241	406	-0.119781	-0.14961	0.42335	0.427703	0.614397	0.995098
chr1:11814681	1	11814681	G	0.0343137	408	-0.148129	-0.167035	0.375179	0.379665	0.0737872	1
chr1:11815202	1	11815202	C	0.150735	408	-0.0922816	-0.0887643	0.298514	0.303059	0.702415	1
chr1:11815237	1	11815237	A	0.0992647	408	-0.071111	-0.107263	0.507357	0.511339	1	1
chr1:11815366	1	11815366	G	0.0514706	408	-0.123595	-0.149685	0.408973	0.413372	0.614275	1
chr1:11815876	1	11815876	G	0.0992647	408	-0.071111	-0.107263	0.507357	0.511339	1	1
chr1:11818254	1	11818254	G	0.0515971	407	-0.122528	-0.149879	0.413638	0.418023	0.614335	0.997549
chr1:11818382	1	11818382	A	0.150735	408	-0.0922816	-0.0887643	0.298514	0.303059	0.702415	1
chr1:11818553	1	11818553	C	0.0514706	408	-0.123595	-0.149685	0.408973	0.413372	0.614275	1
chr1:11818932	1	11818932	G	0.11152	408	-0.00126538	-0.0987824	0.98978	0.989875	0.13643	1
chr1:11819189	1	11819189	G	0.0992647	408	-0.071111	-0.107263	0.507357	0.511339	1	1
chr1:11819241	1	11819241	A	0.060049	408	0.0999953	0.136276	0.463088	0.467285	1	1
chr1:11819414	1	11819414	A	0.060049	408	0.0999953	0.136276	0.463088	0.467285	1	1
chr1:11819443	1	11819443	A	0.064951	408	-0.0152239	-0.131892	0.908107	0.908963	1	1
chr1:11819669	1	11819669	A	0.0343137	408	-0.148129	-0.167035	0.375179	0.379665	0.0737872	1
chr1:11819873	1	11819873	A	0.0992647	408	-0.071111	-0.107263	0.507357	0.511339	1	1
chr1:11820179	1	11820179	G	0.383578	408	-0.0220761	-0.0678991	0.745082	0.747386	0.345853	1
chr1:11820345	1	11820345	A	0.0343137	408	-0.148129	-0.167035	0.375179	0.379665	0.0737872	1
chr1:11820548	1	11820548	A	0.060049	408	0.0999953	0.136276	0.463088	0.467285	1	1
chr1:11820579	1	11820579	A	0.0514706	408	-0.123595	-0.149685	0.408973	0.413372	0.614275	1
chr1:11820717	1	11820717	T	0.383578	408	-0.0220761	-0.0678991	0.745082	0.747386	0.345853	1
chr1:11821376	1	11821376	A	0.0343137	408	-0.148129	-0.167035	0.375179	0.379665	0.0737872	1
chr1:11821436	1	11821436	C	0.11152	408	-0.00126538	-0.0987824	0.98978	0.989875	0.13643	1
chr1:11821446	1	11821446	A	0.064951	408	-0.0152239	-0.131892	0.908107	0.908963	1	1
chr1:11821620	1	11821620	A	0.272059	408	-0.0256215	-0.0741585	0.729721	0.732154	0.319959	1
chr1:11822223	1	11822223	A	0.11152	408	-0.00126538	-0.0987824	0.98978	0.989875	0.13643	1
chr1:11822622	1	11822622	G	0.00245098	408	-1.0544	-0.647117	0.103231	0.106498	1	1
chr1:11822729	1	11822729	A	0.0514706	408	-0.123595	-0.149685	0.408973	0.413372	0.614275	1
chr1:11822972	1	11822972	A	0.11152	408	-0.00126538	-0.0987824	0.98978	0.989875	0.13643	1
chr1:11823024	1	11823024	G	0.060049	408	0.0999953	0.136276	0.463088	0.467285	1	1
chr1:11823389	1	11823389	G	0.11152	408	-0.00126538	-0.0987824	0.98978	0.989875	0.13643	1
chr1:11823412	1	11823412	A	0.11152	408	-0.00126538	-0.0987824	0.98978	0.989875	0.13643	1
chr1:11824179	1	11824179	G	0.11152	408	-0.00126538	-0.0987824	0.98978	0.989875	0.13643	1
chr1:11824736	1	11824736	G	0.0514706	408	-0.123595	-0.149685	0.408973	0.413372	0.614275	1
chr1:11825256	1	11825256	A	0.0269608	408	-0.151407	-0.191585	0.429361	0.433692	0.252323	1
rs14078	1	11825597	A	0.10375	400	0.00431911	0.101688	0.966121	0.966438	0.0562109	0.980392
chr1:11826472	1	11826472	A	0.11152	408	-0.00126538	-0.0987824	0.98978	0.989875	0.13643	1
chr1:11826636	1	11826636	G	0.0503686	407	-0.123857	-0.151442	0.413444	0.417829	0.613184	0.997549
rs198358	1	11826663	G	0.210784	408	-0.0384184	-0.0780447	0.622535	0.625795	0.767066	1
chr1:11826679	1	11826679	A	0.0343137	408	-0.148129	-0.167035	0.375179	0.379665	0.0737872	1
chr1:11826773	1	11826773	G	0.0514706	408	-0.123595	-0.149685	0.408973	0.413372	0.614275	1
chr1:11827578	1	11827578	A	0.0171569	408	-0.0554645	-0.249067	0.823778	0.8254	1	1
chr1:11827594	1	11827594	A	0.390931	408	-0.0307036	-0.067357	0.64851	0.651581	0.406094	1
chr1:11827646	1	11827646	G	0.0465686	408	-0.133189	-0.147346	0.366038	0.370542	0.210892	1
chr1:11828438	1	11828438	G	0.064951	408	-0.0152239	-0.131892	0.908107	0.908963	1	1
chr1:11828582	1	11828582	A	0.057598	408	-0.0815284	-0.139059	0.557684	0.561377	1	1
rs5065	1	11828655	G	0.118873	408	0.00925953	0.095797	0.922998	0.923717	0.150377	1
chr1:11829568	1	11829568	G	0.0612745	408	0.0953996	0.135086	0.480055	0.484174	1	1
rs5064	1	11830190	A	0.0612745	408	0.0953996	0.135086	0.480055	0.484174	1	1
chr1:11830235	1	11830235	A	0.0343137	408	-0.148129	-0.167035	0.375179	0.379665	0.0737872	1
chr1:11830733	1	11830733	C	0.0110294	408	-0.140803	-0.310258	0.649954	0.653014	1	1
chr1:11830754	1	11830754	A	0.0404412	408	-0.12376	-0.166241	0.456597	0.460822	1	1
chr1:11832101	1	11832101	A	0.11152	408	0.0252782	0.100108	0.800646	0.802474	0.317254	1
chr1:11832122	1	11832122	G	0.112745	408	0.0298158	0.0999616	0.765495	0.767626	0.326947	1
chr1:11832323	1	11832323	A	0.0294118	408	-0.11342	-0.185471	0.540851	0.544646	0.294124	1
chr1:11833264	1	11833264	G	0.393382	408	0.0446442	0.0695856	0.521151	0.525058	0.0386221	1
chr1:11833803	1	11833803	C	0.11152	408	0.0252782	0.100108	0.800646	0.802474	0.317254	1
chr1:11840051	1	11840051	A	0.0147059	408	0.104558	0.248241	0.673611	0.676492	0.0787661	1
chr1:11843039	1	11843039	A	0.014742	407	0.106083	0.248242	0.669134	0.672049	0.0789544	0.997549
chr1:11843768	1	11843768	C	0.338235	408	0.0435346	0.0714921	0.542563	0.546347	0.0607394	1
chr1:11843830	1	11843830	G	0.276961	408	0.036861	0.0743844	0.620214	0.623491	0.217346	1
chr1:11844580	1	11844580	A	0.276961	408	0.036861	0.0743844	0.620214	0.623491	0.217346	1
chr1:11844735	1	11844735	G	0.248775	408	0.0575113	0.0783194	0.462755	0.466954	0.0636407	1
rs6668659	1	11844885	C	0.338235	408	0.0435346	0.0714921	0.542563	0.546347	0.0607394	1
chr1:11844993	1	11844993	A	0.00612745	408	-0.620953	-0.414142	0.133777	0.137454	1	1
chr1:11845732	1	11845732	A	0.0147059	408	0.104558	0.248241	0.673611	0.676492	0.0787661	1
chr1:11846614	1	11846614	A	0.0294118	408	-0.101182	-0.192445	0.599048	0.602472	1	1
chr1:11846617	1	11846617	G	0.0269608	408	-0.0641538	-0.201637	0.75036	0.75262	1	1
chr1:11847831	1	11847831	G	0.0294118	408	-0.057911	-0.193654	0.764907	0.767044	1	1
rs6676300	1	11847887	G	0.352941	408	0.0515711	0.071039	0.467866	0.472042	0.0393914	1
chr1:11848319	1	11848319	A	0.0502451	408	0.0883856	0.150924	0.558125	0.561815	0.613177	1
chr1:11848368	1	11848368	G	0.0894608	408	-0.0108318	-0.112644	0.923394	0.924109	1	1
chr1:11848937	1	11848937	A	0.0581683	404	0.0462208	0.138811	0.739151	0.741505	1	0.990196
chr1:11849308	1	11849308	T	0.0147059	408	0.104558	0.248241	0.673611	0.676492	0.0787661	1
chr1:11849345	1	11849345	A	0.0269608	408	-0.0641538	-0.201637	0.75036	0.75262	1	1
chr1:11849485	1	11849485	A	0.0269608	408	-0.0641538	-0.201637	0.75036	0.75262	1	1
chr1:11849520	1	11849520	A	0.00122549	408	0.979131	0.916794	0.285523	0.290056	1	1
chr1:11849643	1	11849643	G	0.0882353	408	0.00351588	0.113202	0.975223	0.975455	1	1
chr1:11850412	1	11850412	A	0.0870098	408	-0.0114854	-0.113772	0.919589	0.92034	1	1
chr1:11850455	1	11850455	G	0.00980392	408	-0.576574	-0.325379	0.0763935	0.0791874	1	1
chr1:11850465	1	11850465	G	0.0269608	408	-0.0641538	-0.201637	0.75036	0.75262	1	1
rs12753716	1	11851228	G	0.060049	408	0.0128916	0.136663	0.924846	0.925547	1	1
chr1:11851301	1	11851301	C	0.355392	408	0.0227974	0.0713264	0.749256	0.751525	0.0303392	1
chr1:11851406	1	11851406	G	0.0735294	408	0.00722198	0.123504	0.95337	0.953806	1	1
chr1:11851417	1	11851417	G	0.253676	408	0.0257054	0.0762296	0.735959	0.738339	0.297552	1
chr1:11851482	1	11851482	A	0.0404412	408	-0.050099	-0.167079	0.76429	0.766432	1	1
chr1:11852740	1	11852740	C	0.0870098	408	-0.0114854	-0.113772	0.919589	0.92034	1	1
chr1:11853450	1	11853450	T	0.0841584	404	-0.0148245	-0.115238	0.897641	0.898594	0.753698	0.990196
chr1:11854032	1	11854032	A	0.0269608	408	-0.0641538	-0.201637	0.75036	0.75262	1	1
chr1:11854675	1	11854675	G	0.268382	408	0.0329235	0.0755965	0.663188	0.666149	0.130068	1
chr1:11855265	1	11855265	A	0.355392	408	0.0227974	0.0713264	0.749256	0.751525	0.0303392	1
chr1:11855291	1	11855291	G	0.252451	408	0.0301722	0.0762099	0.692172	0.694908	0.35827	1
chr1:11855434	1	11855434	A	0.0282555	407	-0.0892737	-0.197122	0.650631	0.653687	1	0.997549
rs198384	1	11856965	G	0.464461	408	0.00168491	0.0629026	0.97863	0.97883	0.320801	1
rs7545290	1	11857515	G	0.0306373	408	-0.0833831	-0.189762	0.660366	0.663348	1	1
chr1:11857753	1	11857753	A	0.0294118	408	-0.129798	-0.193128	0.50153	0.505543	1	1
chr1:11858030	1	11858030	A	0.0294118	408	-0.129798	-0.193128	0.50153	0.505543	1	1
chr1:11858911	1	11858911	C	0.433824	408	0.00389882	0.0660932	0.95296	0.9534	0.481339	1
chr1:11859076	1	11859076	G	0.435049	408	0.00900438	0.0662064	0.891818	0.892824	0.421714	1
rs11804222	1	11859101	A	0.0968137	408	-0.0407665	-0.109557	0.709817	0.712412	1	1
chr1:11859950	1	11859950	A	0.433824	408	0.00389882	0.0660932	0.95296	0.9534	0.481339	1
chr1:11859991	1	11859991	A	0.468137	408	0.00527071	0.0626906	0.932997	0.933622	0.2746	1
chr1:11860927	1	11860927	A	0.4914	407	-0.00234479	-0.0636732	0.970624	0.970899	0.62002	0.997549
chr1:11860986	1	11860986	A	0.0539216	408	-0.0173986	-0.142828	0.903046	0.903949	1	1
chr1:11861343	1	11861343	A	0.477941	408	0.00192336	0.0635912	0.975871	0.976097	0.619742	1
chr1:11861459	1	11861459	A	0.0539216	408	-0.23091	-0.138802	0.0961924	0.0993467	0.325728	1
rs12741980	1	11862180	C	0.0551471	408	-0.0166066	-0.141415	0.906518	0.907389	1	1
chr1:11862853	1	11862853	A	0.363971	408	-0.0566171	-0.0677068	0.403037	0.407454	0.592762	1
chr1:11863845	1	11863845	A	0.0122549	408	0.0785535	0.293581	0.78903	0.790959	1	1
chr1:11864523	1	11864523	G	0.502457	407	-0.0502282	-0.0634279	0.428422	0.432757	0.551891	0.997549
chr1:11864646	1	11864646	G	0.101716	408	0.183822	0.105916	0.0826437	0.085559	1	1
chr1:11865275	1	11865275	A	0.0514706	408	-0.103411	-0.141625	0.465285	0.469472	0.285446	1
chr1:11866011	1	11866011	A	0	408	NA	NA	NA	NA	1	1
chr1:11866379	1	11866379	A	0.0882353	408	-0.032417	-0.110155	0.76854	0.770645	0.224918	1
chr1:11866624	1	11866624	A	0.0392157	408	-0.161253	-0.162925	0.322302	0.326852	0.468695	1
chr1:11868282	1	11868282	A	0.0514706	408	0.355088	0.140772	0.0116546	0.0124607	0.285446	1
chr1:11868782	1	11868782	A	0.0847666	407	0.18882	0.116609	0.10539	0.10869	0.755261	0.997549
chr1:11869043	1	11869043	A	0.395833	408	-0.0266519	-0.0656641	0.684829	0.687623	1	1
chr1:11869076	1	11869076	G	0.395833	408	-0.0266519	-0.0656641	0.684829	0.687623	1	1
chr1:11869131	1	11869131	A	0.395833	408	-0.0266519	-0.0656641	0.684829	0.687623	1	1
chr1:11869160	1	11869160	A	0.395833	408	-0.0266519	-0.0656641	0.684829	0.687623	1	1
chr1:11869175	1	11869175	A	0.356618	408	-0.000538829	-0.0674165	0.993623	0.993683	0.914185	1
chr1:11869897	1	11869897	G	0.365196	408	-0.00749106	-0.066929	0.910883	0.911713	1	1
chr1:11869924	1	11869924	A	0.0724816	407	-0.198573	-0.121521	0.102246	0.105497	0.456417	0.997549
chr1:11870356	1	11870356	T	0.366422	408	-0.00592425	-0.0669802	0.929521	0.930179	0.915311	1
chr1:11870491	1	11870491	A	0.00857843	408	-0.457921	-0.349745	0.190433	0.194616	1	1
chr1:11870544	1	11870544	G	0.366422	408	-0.00592425	-0.0669802	0.929521	0.930179	0.915311	1
chr1:11871247	1	11871247	G	0.405637	408	-0.0316542	-0.0654703	0.628748	0.631964	1	1
chr1:11871712	1	11871712	A	0.366422	408	-0.00592425	-0.0669802	0.929521	0.930179	0.915311	1
chr1:11872058	1	11872058	A	0.405637	408	-0.0316542	-0.0654703	0.628748	0.631964	1	1
chr1:11874213	1	11874213	A	0.405637	408	-0.0316542	-0.0654703	0.628748	0.631964	1	1
chr1:11874782	1	11874782	G	0.405637	408	-0.0316542	-0.0654703	0.628748	0.631964	1	1
chr1:11874799	1	11874799	G	0.405637	408	-0.0316542	-0.0654703	0.628748	0.631964	1	1
chr1:11874890	1	11874890	A	0.0392157	408	-0.161253	-0.162925	0.322302	0.326852	0.468695	1
chr1:11875214	1	11875214	G	0.405637	408	-0.0316542	-0.0654703	0.628748	0.631964	1	1
chr1:11877464	1	11877464	C	0.10049	408	-0.0166941	-0.104125	0.872623	0.873806	0.274876	1
chr1:11877707	1	11877707	C	0.0392157	408	-0.161253	-0.162925	0.322302	0.326852	0.468695	1
chr1:11879071	1	11879071	A	0.405637	408	-0.0316542	-0.0654703	0.628748	0.631964	1	1
chr1:11879796	1	11879796	A	0.366093	407	-0.00777898	-0.0668771	0.907401	0.908264	1	0.997549
chr1:11880226	1	11880226	A	0.419118	408	-0.0318807	-0.0647593	0.622511	0.625772	0.838795	1
chr1:11881241	1	11881241	A	0.0147059	408	-0.00613382	-0.269359	0.981832	0.982002	1	1
chr1:11881310	1	11881310	A	0.495098	408	0.0334367	0.062912	0.595083	0.598534	0.429339	1
chr1:11881323	1	11881323	C	0.0698529	408	-0.182022	-0.123077	0.13916	0.142898	0.432309	1
chr1:11881366	1	11881366	A	0.0147059	408	-0.00613382	-0.269359	0.981832	0.982002	1	1
chr1:11881672	1	11881672	A	0.0870098	408	-0.0162233	-0.110738	0.883525	0.884608	0.212525	1
chr1:11881803	1	11881803	G	0.495098	408	0.0334367	0.062912	0.595083	0.598534	0.429339	1
chr1:11881949	1	11881949	A	0.363971	408	-0.00439091	-0.0671216	0.947842	0.948329	0.914824	1
chr1:11882981	1	11882981	G	0.0870098	408	-0.0162233	-0.110738	0.883525	0.884608	0.212525	1
chr1:11883337	1	11883337	G	0.0379902	408	-0.0144012	-0.170959	0.932868	0.933495	1	1
chr1:11885954	1	11885954	C	0.368421	399	-0.0016815	-0.0672897	0.980064	0.98025	1	0.977941
chr1:11886279	1	11886279	A	0.0392157	408	-0.161253	-0.162925	0.322302	0.326852	0.468695	1
chr1:11886826	1	11886826	A	0.365196	408	-0.00462085	-0.0668225	0.944869	0.945385	1	1
chr1:11888379	1	11888379	A	0.0502451	408	-0.0347881	-0.151	0.817793	0.819469	0.613177	1
chr1:11889943	1	11889943	G	0.444717	407	-0.0459108	-0.0645027	0.47661	0.480746	0.920235	0.997549
chr1:11890492	1	11890492	C	0.421376	407	-0.0246643	-0.0647713	0.703358	0.706005	0.919029	0.997549
chr1:11890665	1	11890665	G	0.366422	408	-0.00958838	-0.066581	0.885492	0.886556	1	1
chr1:11890783	1	11890783	G	0.0392157	408	-0.161253	-0.162925	0.322302	0.326852	0.468695	1
chr1:11890844	1	11890844	T	0.00367647	408	0.312339	0.530827	0.556263	0.559965	1	1
chr1:11890860	1	11890860	A	0.419118	408	-0.01924	-0.0645353	0.765603	0.767733	0.838795	1
chr1:11890924	1	11890924	A	0.366422	408	-0.0136317	-0.0665248	0.837642	0.83914	1	1
rs2038028	1	11902143	A	0.415441	408	-0.0173726	-0.064569	0.787887	0.789825	0.760042	1
rs2639453	1	11905131	A	0.231618	408	-0.0793951	-0.0762904	0.298017	0.302562	0.889746	1
rs3818157	1	11949895	G	0.503686	407	-0.0368871	-0.0642267	0.565747	0.56939	1	0.997549
rs1810563	1	11976617	G	0.309582	407	-0.0888244	-0.0714932	0.214083	0.218402	0.296386	0.997549
rs2297875	1	12064048	A	0.470588	408	-0.0463965	-0.0638461	0.467414	0.471592	0.765778	1
rs12133231	1	12070340	A	0.258578	408	0.0784035	0.0740979	0.290006	0.294545	0.797255	1
rs1148460	1	12139075	A	0.464461	408	0.0365829	0.0632907	0.563255	0.566913	0.551434	1
rs1148459	1	12140439	A	0.466912	408	0.033705	0.062961	0.592421	0.59589	0.42695	1
rs652284	1	12141399	A	0.484069	408	-0.103344	-0.0640866	0.106837	0.110158	1	1
rs590314	1	12146069	A	0.433824	408	-0.0252777	-0.0630065	0.688279	0.691046	0.313476	1
rs522807	1	12146826	A	0.0502451	408	0.309981	0.142669	0.0298007	0.0313665	0.26598	1
rs652625	1	12147938	A	0.0759804	408	0.135853	0.119474	0.255501	0.259977	0.71817	1
rs496888	1	12155393	G	0.335784	408	0.084125	0.0685408	0.219683	0.224029	0.739177	1
rs976881	1	12156341	A	0.279412	408	0.0121404	0.0748174	0.871096	0.872292	0.109868	1
rs5745977	1	12162117	A	0.0257353	408	-0.213472	-0.195548	0.274982	0.2795	0.232037	1
rs3766730	1	12163263	A	0.16299	408	-0.0295944	-0.0884294	0.737876	0.74024	0.58945	1
rs550132	1	12163637	G	0.0379902	408	0.346727	0.159543	0.0297613	0.0313257	0.106621	1
rs816050	1	12164578	A	0.227941	408	-0.0479941	-0.0748759	0.521534	0.52544	0.402335	1
rs17037696	1	12165861	A	0.270833	408	-0.0389659	-0.0735759	0.596389	0.599831	0.531277	1
rs505844	1	12167616	G	0.272059	408	-0.0328611	-0.0731346	0.653198	0.656235	0.619444	1
rs478143	1	12168295	C	0.279412	408	-0.0169641	-0.0724361	0.814835	0.816537	0.712979	1
rs474247	1	12168762	A	0.207108	408	0.0127652	0.0794263	0.872315	0.8735	1	1
rs5746001	1	12171090	A	0.165441	408	0.00600513	0.0888466	0.946112	0.946616	0.367922	1
rs945439	1	12171529	G	0.257353	408	-0.0296151	-0.0738705	0.68849	0.691254	0.896975	1
rs1201157	1	12171618	A	0.405637	408	0.0577018	0.0618608	0.350939	0.355467	0.0307947	1
rs548580	1	12172357	A	0.254902	408	-0.0218901	-0.0738964	0.767056	0.769175	1	1
rs5746016	1	12173566	A	0.0698529	408	-0.269784	-0.122781	0.028	0.0295015	0.432309	1
rs653667	1	12174395	C	0.404412	408	-0.0677754	-0.0617297	0.272231	0.276744	0.023551	1
rs1768642	1	12175479	A	0.259804	408	-0.0371762	-0.0734449	0.612732	0.616061	1	1
rs636964	1	12175938	G	0.209559	408	-0.126611	-0.0758055	0.0948795	0.098012	0.134857	1
rs235249	1	12180818	G	0.257353	408	-0.0282577	-0.0738855	0.702126	0.704782	0.896975	1
rs5746053	1	12184885	A	0.196078	408	0.130278	0.0828147	0.115689	0.119137	0.344559	1
rs235219	1	12186942	A	0.0919118	408	0.237777	0.112795	0.0350265	0.0367689	0.557746	1
rs5746061	1	12189178	G	0.229167	408	0.0607392	0.0817418	0.457444	0.461666	0.00774485	1
rs1061628	1	12190586	A	0.389706	408	-0.0804914	-0.0650929	0.21625	0.22058	0.677704	1
rs1061631	1	12191086	A	0.181373	408	-0.0896971	-0.0844251	0.288033	0.292569	0.73986	1
rs235214	1	12194090	A	0.151961	408	0.112628	0.0921849	0.221799	0.226155	0.248579	1
rs7550488	1	12201519	A	0.246324	408	-0.0827617	-0.0723022	0.252348	0.256815	0.285247	1
rs7547379	1	12229201	G	0.0257353	408	-0.111859	-0.205443	0.586111	0.589622	1	1
rs12125606	1	12469281	A	0.237101	407	-0.13426	-0.0762506	0.0782773	0.0811086	0.681953	0.997549
rs6541035	1	12543132	A	0.238971	408	-0.0943874	-0.0757053	0.21248	0.216792	0.786591	1
rs11121943	1	12564163	G	0.0183824	408	0.00782348	0.241073	0.974111	0.974353	1	1
rs12029485	1	12564830	C	0.0318627	408	-0.159427	-0.185524	0.390155	0.394606	1	1
rs12045736	1	12576622	G	0.481618	408	-0.00872664	-0.0646246	0.892584	0.893583	0.767089	1
rs4846127	1	12586361	G	0.491422	408	0.000147642	0.0652875	0.998196	0.998213	0.552216	1
rs6689733	1	12602767	G	0.181373	408	-0.00603872	-0.0808809	0.940484	0.94104	0.242445	1
rs2256895	1	12642022	G	0.0490196	408	-0.170032	-0.152222	0.263992	0.268489	0.613101	1
rs2265711	1	12657361	G	0.0747549	408	-0.131104	-0.122336	0.283869	0.2884	1	1
rs3010951	1	12680258	G	0.0943627	408	-0.0817894	-0.112144	0.465804	0.469989	0.559378	1
rs3000860	1	12698805	A	0.125307	407	-0.0065113	-0.0953811	0.945574	0.946082	0.494355	0.997549
rs3000858	1	12699907	G	0.16299	408	0.0383324	0.0860121	0.65584	0.658857	0.71577	1
rs4240904	1	12708910	A	0.115196	408	0.0556053	0.0986288	0.572902	0.576499	0.462245	1
rs2999877	1	13657649	G	0.150735	408	-0.0588072	-0.0883576	0.505693	0.509684	0.559959	1
rs11584331	1	13668384	A	0.151961	408	-0.112655	-0.0870762	0.19575	0.199967	0.33511	1
rs2924863	1	13670298	C	0.0122549	408	0.0273373	0.293483	0.925786	0.926479	1	1
rs3013094	1	13670620	G	0.0122549	408	0.0273373	0.293483	0.925786	0.926479	1	1
rs3013101	1	13672722	G	0.155637	408	-0.118551	-0.0865926	0.17098	0.17502	0.449391	1
rs3013105	1	13674912	G	0.404412	408	-0.0162634	-0.0630291	0.796384	0.798248	0.0997913	1
rs3856278	1	13732157	G	0.137592	407	0.0176091	0.0929633	0.849763	0.851153	0.835751	0.997549
rs1148454	1	13783980	A	0.0919118	408	-0.0159214	-0.114298	0.889215	0.890246	0.557746	1
rs12136848	1	13816762	C	0.00367647	408	-0.0604374	-0.530345	0.909271	0.910116	1	1
rs11587701	1	13819084	G	0.064951	408	0.0313039	0.129662	0.809225	0.810976	0.682081	1
rs2487633	1	13852064	G	0.0870098	408	0.270954	0.113177	0.0166625	0.0177082	1	1
rs17393663	1	13904402	A	0.253676	408	-0.184988	-0.0695504	0.00781952	0.00841696	0.0257946	1
rs1406417	1	13965452	C	0.0788177	406	0.305464	0.119463	0.0105587	0.0113077	1	0.995098
rs1210110	1	13969408	G	0.256127	408	0.0672684	0.0730363	0.357036	0.361555	0.794798	1
rs1203641	1	13992427	A	0.281863	408	0.0607637	0.0707083	0.390143	0.394595	0.713881	1
rs2281161	1	14007024	A	0.20516	407	-0.0954878	-0.077169	0.215944	0.220273	0.22689	0.997549
rs1203690	1	14034610	A	0.187961	407	-0.140531	-0.0812104	0.0835495	0.0864819	0.625538	0.997549
rs12025627	1	14118384	A	0.00980392	408	0.507745	0.326162	0.119536	0.123037	1	1
rs7543063	1	14125164	G	0.289216	408	0.0194098	0.0758642	0.798068	0.799918	0.00799144	1
rs12133241	1	14132807	C	0.159314	408	0.022758	0.0886993	0.797507	0.799362	0.714165	1
rs12081055	1	14140629	G	0.449755	408	0.0140508	0.0665576	0.832803	0.834346	0.229768	1
rs2884821	1	14168049	G	0.403186	408	0.0320008	0.0694343	0.644886	0.647984	0.023607	1
rs7543486	1	14170601	A	0.356265	407	0.00923811	0.0665913	0.889665	0.890691	0.828796	0.997549
rs10927981	1	14186957	G	0.147059	408	0.0298204	0.0916039	0.744775	0.747082	0.845708	1
rs1883647	1	14213403	G	0.109069	408	0.0645052	0.106662	0.545338	0.549106	0.202252	1
rs6669709	1	14215282	A	0.314951	408	0.129978	0.0684886	0.057721	0.0601016	0.908811	1
rs2246175	1	14273937	A	0.302696	408	0.0218094	0.0716126	0.760711	0.762883	0.34862	1
rs16853565	1	14282799	G	0.102941	408	-0.0715146	-0.107256	0.504922	0.508918	0.786371	1
rs12047577	1	14301762	A	0.245098	408	-0.0162736	-0.0737807	0.82543	0.827038	0.688705	1
rs10928009	1	14306362	G	0.243873	408	-0.0194421	-0.0737886	0.792178	0.794079	0.686813	1
rs12026462	1	14312607	G	0.243873	408	-0.0194421	-0.0737886	0.792178	0.794079	0.686813	1
rs10928016	1	14314325	A	0.428922	408	0.0326391	0.0662896	0.622457	0.625718	0.479124	1
rs12738487	1	14346392	G	0.155637	408	-0.0538962	-0.0845461	0.523814	0.527707	0.0590482	1
rs10429930	1	14363216	C	0.0992647	408	-0.0825018	-0.104224	0.428607	0.432941	0.264726	1
rs11591032	1	14368824	A	0.0563725	408	0.0843375	0.14028	0.5477	0.551454	1	1
rs526188	1	14380116	G	0.420343	408	0.0461088	0.0655842	0.482026	0.486137	0.760439	1
rs4478803	1	14431668	A	0.0196078	408	-0.54507	-0.233401	0.0195257	0.0206962	1	1
rs6668555	1	14452329	A	0.164216	408	0.0629155	0.0864552	0.466783	0.470963	1	1
rs11808667	1	14479928	G	0.0563725	408	0.0154153	0.140206	0.912451	0.913267	1	1
rs13373827	1	14513207	A	0.112745	408	0.0135534	0.102793	0.895102	0.896078	0.803503	1
rs820626	1	14529687	C	0.322304	408	0.0662221	0.0674975	0.326541	0.331089	0.571139	1
rs7513436	1	14543390	A	0.383578	408	-0.034499	-0.0643751	0.592024	0.595495	0.296406	1
rs10754855	1	14615310	A	0.0625	408	-0.0911264	-0.128591	0.478539	0.482666	0.199446	1
rs17402096	1	14674480	A	0.105392	408	-0.0516331	-0.105258	0.623754	0.627005	1	1
rs7555566	1	14677461	G	0.129902	408	0.000924239	0.0941846	0.99217	0.992244	0.659394	1
rs4385705	1	14748619	A	0.455665	406	-0.0348154	-0.0642152	0.587703	0.591204	0.920321	0.995098
rs10927466	1	14762658	A	0.32598	408	0.0701317	0.070406	0.3192	0.323751	0.26038	1
rs6661767	1	14950154	C	0.439803	407	-0.086747	-0.0661886	0.189992	0.194172	0.36657	0.997549
rs1630519	1	14988795	C	0.289216	408	0.0174208	0.0706783	0.805311	0.807097	0.810575	1
rs1737350	1	14995776	G	0.294118	408	0.11767	0.0673983	0.080829	0.0837099	0.120693	1
rs3845594	1	15058996	A	0.355392	408	0.0527035	0.0664822	0.427926	0.432263	0.746496	1
rs3845597	1	15062259	G	0.383292	407	0.0300749	0.0666194	0.651669	0.654717	0.753635	0.997549
rs3765381	1	15062616	A	0.122549	408	0.13333	0.093545	0.15407	0.157962	0.101288	1
rs4661542	1	15086272	C	0.0565111	407	0.0570127	0.14336	0.690859	0.693606	0.628498	0.997549
rs6429700	1	15206335	G	0.290441	408	-0.0166409	-0.0695408	0.810875	0.812612	0.400754	1
rs6681053	1	15207369	G	0.120098	408	-0.0154713	-0.102196	0.879669	0.880787	0.241401	1
rs4661561	1	15213642	A	0.0710784	408	0.0781496	0.120591	0.516949	0.52088	0.134152	1
rs6679504	1	15228810	A	0.497549	408	-0.0532248	-0.0654618	0.41618	0.420556	0.488143	1
rs6704367	1	15243919	G	0.0588235	408	0.0159457	0.135054	0.906013	0.906889	0.640325	1
rs16851308	1	15319660	A	0.0257353	408	-0.127988	-0.195596	0.512888	0.516841	0.232037	1
rs6429722	1	15370314	A	0.0661765	408	0.0463233	0.133768	0.729121	0.731558	0.240981	1
rs7518884	1	15520415	A	0.356618	408	-0.0436093	-0.0671462	0.516036	0.519972	1	1
rs2253372	1	15596620	A	0.290441	408	-0.0165177	-0.0743776	0.824252	0.825871	0.0541234	1
rs1883426	1	15598703	A	0.278186	408	0.00897851	0.0750723	0.904801	0.905688	0.0835348	1
rs742362	1	15599378	G	0.10049	408	0.0125636	0.106718	0.906283	0.907157	1	1
rs555015	1	15645520	G	0.531863	408	0.00215128	0.0622416	0.972428	0.972686	0.196601	1
rs4661627	1	15658782	A	0.382353	408	-0.0171991	-0.0641355	0.78857	0.790503	0.294173	1
rs7556116	1	15669301	A	0.193627	408	0.109384	0.082379	0.184239	0.18838	0.529024	1
rs3766160	1	15681459	A	0.264706	408	-0.0805668	-0.0710324	0.2567	0.261179	0.375211	1
rs16851970	1	15916988	A	0.204657	408	-0.0124051	-0.0807093	0.877845	0.87898	0.647943	1
rs12744547	1	15934965	G	0.224265	408	0.128346	0.0769396	0.0952882	0.0984276	1	1
rs904911	1	15999519	A	0.321078	408	0.0235911	0.0674683	0.726592	0.72905	0.497069	1
rs1122068	1	16000067	G	0.321078	408	0.0235911	0.0674683	0.726592	0.72905	0.497069	1
rs6677321	1	16021888	C	0.328431	408	0.0171999	0.067072	0.797612	0.799465	0.501695	1
rs4661667	1	16035318	A	0.328431	408	0.0171999	0.067072	0.797612	0.799465	0.501695	1
rs10927864	1	16038248	C	0.328431	408	0.0171999	0.067072	0.797612	0.799465	0.501695	1
rs3979179	1	16179433	A	0.305147	408	0.0349078	0.0679729	0.607564	0.610929	0.351227	1
rs1544131	1	16218322	A	0.0551471	408	-0.0439769	-0.138038	0.750041	0.752304	0.346434	1
rs3754322	1	16219094	C	0.258578	408	0.046986	0.0699986	0.502066	0.506076	0.0522353	1
rs1010069	1	16225524	A	0.445946	407	-0.0733596	-0.0663922	0.269185	0.273692	0.3667	0.997549
rs11260711	1	16322333	A	0.235294	408	-0.0310286	-0.0742675	0.676096	0.678958	0.493177	1
rs3820610	1	16325585	G	0.273284	408	-0.016937	-0.0716288	0.81308	0.814798	0.900946	1
rs6656611	1	16388392	A	0.348039	408	-0.0108324	-0.0666115	0.870817	0.872015	0.585834	1
rs221031	1	16397456	G	0.224265	408	-0.00676724	-0.0746668	0.927785	0.928459	0.201366	1
rs9629265	1	16559381	A	0.389706	408	-0.0151281	-0.0672743	0.822079	0.823717	0.466302	1
rs6660924	1	16602287	G	0.464461	408	0.0482449	0.063468	0.447167	0.451431	0.551434	1
rs12145711	1	16615985	G	0.402948	407	-0.0492794	-0.0658819	0.454462	0.458696	0.917918	0.997549
rs2143808	1	17155012	A	0.125	408	0.085891	0.0994223	0.387642	0.3921	0.368337	1
rs6691985	1	17162498	A	0.322304	408	-0.0596074	-0.0680185	0.380844	0.385318	0.734	1
rs2281376	1	17170174	G	0.105911	406	0.0633728	0.105278	0.547204	0.550961	1	0.995098
rs7513616	1	17171083	G	0.480392	408	-0.00228354	-0.0635997	0.971358	0.971626	0.765991	1
rs9435732	1	17180745	A	0.256127	408	-0.0963023	-0.073499	0.190111	0.194291	1	1
rs6684770	1	17198542	A	0.290441	408	0.0344094	0.0679606	0.612636	0.615967	0.118563	1
rs6657613	1	17200787	T	0.502451	408	-0.0128359	-0.0619864	0.83595	0.837464	0.166517	1
rs3738814	1	17204263	G	0.443627	408	0.0210269	0.0627451	0.737538	0.739905	0.269891	1
rs2647168	1	17213465	A	0.0784314	408	-0.034708	-0.118229	0.76909	0.771191	0.726909	1
rs1022580	1	17232263	C	0.0232843	408	0.263589	0.214784	0.219736	0.224082	1	1
rs2235928	1	17251616	G	0.196078	408	-0.00873539	-0.0825635	0.915739	0.916525	0.528943	1
rs2647209	1	17255149	G	0.0710784	408	-0.0909642	-0.127712	0.476303	0.480441	0.709272	1
rs12404121	1	17258691	G	0.345588	408	0.0077384	0.0675284	0.908766	0.909617	1	1
rs11203290	1	17262167	A	0.360294	408	0.0632791	0.0669898	0.344859	0.349394	0.914501	1
rs2235910	1	17298416	C	0.404412	408	-0.0373978	-0.0668497	0.575868	0.579446	0.356348	1
rs877648	1	17334848	G	0.363971	408	0.00436101	0.0676708	0.948616	0.949097	0.592762	1
rs2977265	1	17375797	A	0.307598	408	-0.00736777	-0.0670853	0.912547	0.913362	0.132504	1
rs4384275	1	17406897	A	0.280637	408	0.0170301	0.0701248	0.808119	0.80988	0.464167	1
rs2977283	1	17414536	G	0.308824	408	0.0879936	0.0688961	0.201534	0.205786	0.816729	1
rs2977313	1	17442536	G	0.14951	408	-0.031565	-0.0920662	0.73171	0.734126	0.558091	1
rs12129306	1	17445836	C	0.0441176	408	-0.0286788	-0.155185	0.853383	0.85474	0.554007	1
rs3003438	1	17479147	A	0.136029	408	-0.00513815	-0.0986184	0.958448	0.958837	0.0587985	1
rs4625336	1	17503551	A	0.183824	408	0.102832	0.0813805	0.206376	0.210655	0.508029	1
rs877551	1	17503940	A	0.393382	408	-0.105118	-0.0654011	0.107991	0.11133	0.836429	1
rs1635576	1	17538913	C	0.117647	408	0.0476608	0.101492	0.63864	0.641784	0.631786	1
rs2240335	1	17547124	A	0.323529	408	-0.0737989	-0.0692793	0.286769	0.291303	0.735614	1
rs1204898	1	17580326	A	0.284314	408	0.00530286	0.0717119	0.941053	0.941604	0.903232	1
rs6688886	1	17626226	A	0.335784	408	0.0606772	0.0686218	0.376574	0.381057	0.739177	1
rs1408420	1	17627402	A	0.33701	408	0.0607536	0.0683139	0.373826	0.378315	0.824995	1
rs2883272	1	17645746	A	0.183824	408	-0.118784	-0.0823567	0.149214	0.153058	1	1
rs12078935	1	17664469	A	0.395833	408	0.000823653	0.0680591	0.990344	0.990435	0.178395	1
rs2477735	1	17741766	G	0.0980392	408	0.0756675	0.106063	0.475587	0.479727	0.570464	1
rs4920376	1	17773392	A	0.0220588	408	-0.479778	-0.220006	0.0292019	0.0307465	1	1
rs12724758	1	17800846	G	0.169118	408	0.030955	0.0874815	0.723454	0.725938	0.479536	1
rs6672746	1	17813761	A	0.0134804	408	-0.0789331	-0.280646	0.778514	0.780534	1	1
rs12562076	1	17830827	G	0.183824	408	0.0542188	0.0831767	0.514498	0.518442	0.870311	1
rs3766306	1	17842165	A	0.191176	408	0.0696081	0.0827739	0.40038	0.404804	0.632274	1
rs16830757	1	17997114	A	0.182598	408	0.0569296	0.0848073	0.502041	0.506051	0.506266	1
rs1541161	1	18103204	A	0.0404412	408	0.0938649	0.156675	0.549101	0.552847	0.132564	1
rs4920651	1	18105060	A	0.468137	408	-0.0529826	-0.0635967	0.404787	0.409199	0.486964	1
rs12029767	1	18111249	G	0.0367647	408	0.067639	0.16264	0.677497	0.680348	0.0948637	1
rs11203245	1	18156012	C	0.48652	408	-0.0510056	-0.0639058	0.424791	0.429139	0.921348	1
rs1192607	1	18183163	A	0.136029	408	-0.0614208	-0.0903218	0.496491	0.50053	0.141899	1
rs875294	1	18216138	C	0.441176	408	0.109105	0.0669266	0.103056	0.10632	0.159848	1
rs12132348	1	18227737	G	0.512255	408	0.051613	0.0654993	0.430701	0.435028	0.487798	1
rs4920430	1	18310916	G	0.127451	408	0.0393993	0.0917944	0.667768	0.670694	0.0701917	1
rs4920440	1	18348085	A	0.386029	408	-0.0472409	-0.0649086	0.466732	0.470913	0.530878	1
rs9727014	1	18348774	A	0.318627	408	-0.00783497	-0.0690751	0.909692	0.910534	1	1
rs17435169	1	18368746	A	0.294118	408	0.143349	0.0698071	0.0400233	0.0419226	0.905056	1
rs12039774	1	18374768	A	0.261029	408	-0.0435948	-0.0736383	0.553842	0.557558	0.898357	1
rs9728569	1	18382620	A	0.442402	408	0.0956466	0.0643415	0.137134	0.14085	1	1
rs12749656	1	18383380	A	0.0723039	408	0.0987762	0.124395	0.427164	0.431503	1	1
rs12401679	1	18470345	G	0.204657	408	0.0642951	0.0794884	0.418594	0.422963	1	1
rs12566510	1	18578281	G	0.0625	408	-0.0518032	-0.134696	0.70054	0.703209	1	1
rs9662941	1	18609123	A	0.185049	408	0.0499678	0.0831233	0.547754	0.551508	0.869953	1
rs869080	1	18624451	G	0.346437	407	-0.0894453	-0.0645267	0.165693	0.16969	0.0797676	0.997549
rs10907312	1	18658053	G	0.506127	408	-0.0598964	-0.06404	0.349635	0.354164	0.921317	1
rs11589176	1	18667354	A	0.0134804	408	0.224634	0.25692	0.381937	0.386408	0.0660034	1
rs2992764	1	18676731	G	0.404412	408	0.0636013	0.062924	0.312129	0.31668	0.149892	1
rs682616	1	18907096	G	0.106618	408	0.0290196	0.103413	0.779003	0.781018	0.794949	1
rs2743197	1	18913849	A	0.205882	408	0.0527266	0.0778056	0.49798	0.502012	0.448038	1
rs12732543	1	18966099	G	0.0416667	408	-0.16829	-0.154414	0.275776	0.280295	0.14673	1
rs11261076	1	19011540	T	0.248775	408	0.042568	0.0737755	0.563943	0.567597	0.894519	1
rs12063142	1	19012104	A	0.322304	408	0.0321381	0.0661303	0.626981	0.630209	0.140721	1
rs12028479	1	19017724	A	0.0906863	408	-0.112694	-0.110588	0.308184	0.312734	0.760492	1
rs6603918	1	19030520	A	0.100248	404	-0.104358	-0.107675	0.33245	0.336995	1	0.990196
rs3762396	1	19382981	A	0.371324	408	0.0459251	0.0656434	0.484167	0.488267	0.750337	1
rs12121004	1	19401434	G	0.143382	408	-0.045817	-0.0899731	0.610591	0.613935	0.543496	1
rs17393888	1	19415518	A	0.134804	408	-0.0361021	-0.0915776	0.693416	0.696142	0.285822	1
rs709683	1	19437931	C	0.387255	408	-0.0635146	-0.0652937	0.330677	0.335223	0.754207	1
rs710865	1	19441559	G	0.389706	408	-0.0534121	-0.0654662	0.414573	0.418954	0.83539	1
rs1063986	1	19459158	G	0.101966	407	0.0573851	0.111046	0.605317	0.608698	0.102349	0.997549
rs12146076	1	19517942	G	0.324755	408	0.0369953	0.0684881	0.589079	0.59257	0.821857	1
rs7523414	1	19535600	G	0.0503686	407	-0.0844067	-0.14263	0.553993	0.557708	0.266936	0.997549
rs12124339	1	19542597	A	0.0502451	408	-0.0800716	-0.143022	0.575579	0.579159	0.26598	1
rs17477654	1	19553131	G	0.251843	407	-0.038558	-0.0733711	0.599222	0.602645	0.429515	0.997549
rs884630	1	19587898	A	0.398284	408	-0.0250074	-0.0664855	0.706818	0.709437	0.918004	1
rs12066114	1	19665114	G	0.273284	408	-0.0702011	-0.0718245	0.328372	0.33292	0.900946	1
rs12755497	1	19665149	G	0.303922	408	0.078963	0.0674266	0.24156	0.245994	0.100738	1
rs4362008	1	19710145	G	0.22549	408	-0.0106152	-0.0794057	0.893653	0.894643	0.203821	1
rs4912122	1	19749025	A	0.362745	408	0.111592	0.0673805	0.0976913	0.10087	0.593961	1
rs2792043	1	19797249	A	0.46201	408	-0.0215616	-0.0636295	0.734714	0.737105	0.691474	1
rs3762387	1	19841899	A	0.0355392	408	-0.0501797	-0.176324	0.775959	0.778001	1	1
rs2294630	1	19854378	G	0.481572	407	0.0396536	0.0635133	0.532407	0.536251	0.766057	0.997549
rs3929668	1	19924960	A	0.365196	408	-0.0144302	-0.0663063	0.827717	0.829305	0.915057	1
rs960242	1	19930826	A	0.0197531	405	0.0950927	0.233601	0.683954	0.686755	1	0.992647
rs1541185	1	20014115	A	0.292892	408	0.124887	0.0696051	0.0727765	0.0754966	0.63328	1
rs7532822	1	20044471	A	0.221814	408	0.175705	0.0782924	0.0248184	0.0262015	0.885939	1
rs16860415	1	20071414	A	0.0196078	408	-0.221857	-0.219297	0.311695	0.316246	0.139219	1
rs12083280	1	20148455	G	0.181373	408	-0.107583	-0.0825461	0.192469	0.196665	0.867415	1
rs1891320	1	20169698	A	0.366422	408	-0.0663654	-0.066951	0.321562	0.326112	0.915311	1
rs11677	1	20174551	A	0.0968137	408	0.0356921	0.110177	0.745974	0.748271	1	1
rs16860431	1	20261943	A	0.0355392	408	0.139346	0.176121	0.428828	0.433162	1	1
rs3179690	1	20390813	A	0.159314	408	0.136907	0.0885296	0.121994	0.125527	0.714165	1
rs737647	1	20409172	G	0.345588	408	-0.117591	-0.0664315	0.0767095	0.0795097	0.661368	1
rs2213801	1	20417422	A	0.242647	408	0.056713	0.0762527	0.457027	0.46125	0.50051	1
rs10916724	1	20422959	G	0.248775	408	0.0766196	0.075674	0.311301	0.315852	0.429239	1
rs10916732	1	20442874	A	0.102941	408	0.00549168	0.10763	0.959306	0.959687	0.786371	1
rs10489156	1	20448489	G	0.39951	408	-0.0190715	-0.0626661	0.760872	0.763043	0.0790242	1
rs4655167	1	20449617	G	0.10049	408	0.0150643	0.108766	0.889844	0.890868	0.783625	1
rs763203	1	20471969	A	0.3125	408	-0.158789	-0.067075	0.0179165	0.0190178	0.356606	1
rs4655192	1	20505892	A	0.339461	408	0.0826731	0.0683842	0.226682	0.231059	0.740489	1
rs4654851	1	20516531	G	0.252451	408	-0.00856701	-0.0719397	0.905207	0.90609	0.29492	1
rs230182	1	20551138	G	0.116422	408	0.130646	0.100321	0.192823	0.197021	1	1
rs4655204	1	20585003	G	0.248775	408	-0.0395481	-0.0728032	0.586979	0.590484	0.507239	1
rs10916785	1	20603704	G	0.404412	408	-0.0238023	-0.0645219	0.7122	0.714776	0.680916	1
rs12741740	1	20671182	A	0.323529	408	0.0954704	0.0687304	0.164816	0.168805	0.910391	1
rs645548	1	20739286	A	0.0772059	408	0.0249707	0.12171	0.837443	0.838944	1	1
rs12564872	1	20746434	G	0.0269608	408	-0.0589393	-0.200898	0.769232	0.771332	1	1
rs471760	1	20789793	A	0.289216	408	-0.104698	-0.0711357	0.141075	0.144834	0.904096	1
rs1614627	1	20819343	A	0.0810811	407	0.0501225	0.117343	0.669275	0.672189	0.738577	0.997549
rs1043502	1	20850335	C	0.302696	408	0.0538844	0.0711567	0.448892	0.453149	0.482242	1
rs10157351	1	20869927	C	0.433661	407	-0.0544275	-0.0642746	0.397109	0.401542	0.762774	0.997549
rs4143111	1	20886133	A	0.150735	408	-0.0386839	-0.0919443	0.673951	0.676829	0.445045	1
rs521424	1	20897330	A	0.384804	408	-0.0309234	-0.0668077	0.643456	0.646565	0.675951	1
rs2296225	1	20903629	G	0.0698529	408	-0.252426	-0.127627	0.0479466	0.0500743	0.709002	1
rs2274120	1	20975386	G	0.0735294	408	-0.25945	-0.124782	0.0375965	0.039421	0.712204	1
rs12565504	1	21005162	A	0.0134804	408	-0.161598	-0.280496	0.564537	0.568187	1	1
rs3767239	1	21035895	G	0.115196	408	-0.0189697	-0.104797	0.856358	0.857688	0.140751	1
rs2305463	1	21052768	G	0.439951	408	0.0705792	0.0653337	0.280014	0.28454	0.763133	1
rs17450586	1	21127180	C	0.444853	408	-0.0617335	-0.0645988	0.339251	0.343791	1	1
rs2038089	1	21424044	G	0.442402	408	0.0358812	0.0651952	0.582068	0.585606	0.763637	1
rs9426748	1	21431077	A	0.442402	408	0.0315558	0.0651875	0.62833	0.631549	0.763637	1
rs212540	1	21465704	G	0.377451	408	0.00978574	0.0648087	0.87998	0.881095	0.401521	1
rs213037	1	21528471	A	0.126225	408	0.0588339	0.0983017	0.549504	0.553247	0.654578	1
rs4654918	1	21529826	A	0.0539216	408	-0.211692	-0.142076	0.136226	0.139931	1	1
rs1827293	1	21667975	A	0.485294	408	0.0164553	0.0662468	0.803829	0.805629	0.275367	1
rs10799701	1	21693577	A	0.473039	408	0.0210573	0.0639658	0.742007	0.744337	0.92091	1
rs1780324	1	21694344	A	0.473039	408	0.0210573	0.0639658	0.742007	0.744337	0.92091	1
rs1697421	1	21695879	A	0.485294	408	0.0167776	0.0634824	0.791558	0.793464	0.692908	1
rs4654755	1	21716195	G	0.406863	408	0.0219296	0.0652734	0.736897	0.739269	0.91854	1
rs6665848	1	21837750	A	0.0526961	408	-0.274363	-0.143282	0.0555121	0.057838	1	1
rs2625408	1	21851817	G	0.397059	408	0.071963	0.0651366	0.269246	0.273753	0.917669	1
rs12128325	1	21875454	A	0.210784	408	-0.0598281	-0.0788113	0.447774	0.452036	1	1
rs12742372	1	22008177	T	0.0637255	408	0.0151391	0.133598	0.909778	0.910619	1	1
rs12404444	1	22063520	A	0.189951	408	-0.0198644	-0.0826324	0.810024	0.811769	1	1
rs7531732	1	22148283	A	0.00490196	408	0.069351	0.459674	0.880078	0.881192	1	1
rs4504857	1	22178493	A	0.0183824	408	-0.0616291	-0.24186	0.798867	0.80071	1	1
rs10799722	1	22181103	C	0.0232843	408	-0.0337585	-0.21575	0.875662	0.876817	1	1
rs7520656	1	22184626	G	0.0490196	408	0.177357	0.141116	0.20882	0.213113	0.063257	1
rs16826354	1	22264354	A	0.0183824	408	0.096589	0.241424	0.689097	0.691857	1	1
rs17837966	1	22267300	A	0.00122549	408	1.3296	0.91477	0.14609	0.149902	1	1
rs7526484	1	22324432	A	0.248775	408	0.0340991	0.075989	0.653622	0.656655	0.429239	1
rs10917157	1	22325911	G	0.0502451	408	-0.0976466	-0.15062	0.516792	0.520724	0.613177	1
rs7521902	1	22363311	A	0.258578	408	0.0325974	0.0737613	0.65854	0.661536	0.797255	1
rs2807357	1	22364571	G	0.349265	408	-0.00577348	-0.0665436	0.93086	0.931506	0.662999	1
rs909813	1	22369290	G	0.189951	408	-0.00663235	-0.0805078	0.934343	0.934957	0.425539	1
rs3856181	1	22425556	G	0.292383	407	-0.129208	-0.0686503	0.0598201	0.0622514	0.337534	0.997549
rs2807321	1	22427478	A	0.060049	408	0.250376	0.130152	0.0543902	0.0566878	0.167747	1
rs11810369	1	22560238	A	0.120098	408	0.00263086	0.0996575	0.978939	0.979136	0.817537	1
rs11810751	1	22564184	C	0.131127	408	0.0121366	0.0959277	0.899322	0.900259	0.828567	1
rs4409621	1	22605336	A	0.0906863	408	0.0617035	0.113802	0.587681	0.591181	0.558717	1
rs12725956	1	22660741	G	0.339461	408	0.0236479	0.0659185	0.719786	0.722299	0.270737	1
rs209734	1	22754977	A	0.0159314	408	-0.141901	-0.258019	0.582345	0.58588	1	1
rs682658	1	22841402	A	0.512255	408	0.0236452	0.0626621	0.705917	0.708543	0.323322	1
rs629409	1	22859325	A	0.118873	408	-0.0940313	-0.0953232	0.323914	0.328463	0.150377	1
rs6687487	1	22934138	A	0.105392	408	-0.0778781	-0.105268	0.459416	0.463629	1	1
rs12723359	1	23010348	G	0.290441	408	0.131493	0.0704505	0.0619768	0.0644591	0.904464	1
rs7545588	1	23065692	C	0.0465686	408	-0.125648	-0.151431	0.406687	0.411093	0.594797	1
rs744834	1	23119982	A	0.502451	408	-0.105303	-0.0598816	0.078659	0.0814978	0.00560147	1
rs309517	1	23124179	T	0.314951	408	0.00814587	0.0684696	0.905299	0.906181	0.731131	1
rs620514	1	23151219	G	0.268382	408	-0.056762	-0.0715789	0.427778	0.432115	0.705322	1
rs2072944	1	23278459	G	0.452206	408	0.0130381	0.0638915	0.838301	0.839794	0.764664	1
rs1983965	1	23292442	A	0.136029	408	-0.0729374	-0.0930971	0.433359	0.437677	0.833009	1
rs1208932	1	23301709	A	0.409314	408	-0.0324575	-0.0656809	0.621187	0.624457	0.83795	1
rs16827981	1	23308125	A	0.182598	408	0.106884	0.0847193	0.207083	0.211366	0.506266	1
rs16828054	1	23413130	A	0.161765	408	0.094857	0.0876604	0.27921	0.283734	1	1
rs2903545	1	23413695	G	0.389706	408	-0.0308126	-0.0654093	0.637588	0.64074	0.83539	1
rs12567682	1	23491293	G	0.234069	408	0.0200464	0.0780906	0.797405	0.799261	0.270096	1
rs17437121	1	23513250	G	0.170343	408	-0.0377611	-0.0823774	0.646671	0.649756	0.0786516	1
rs12127143	1	23563260	A	0.0294118	408	0.141892	0.193019	0.462268	0.466468	1	1
rs10737472	1	23581506	C	0.126225	408	0.0380887	0.0993196	0.701352	0.704015	0.368355	1
rs686546	1	23582764	A	0.0526961	408	0.0859585	0.134473	0.522676	0.526575	0.0191731	1
rs2298632	1	23583062	G	0.470588	408	-0.0871313	-0.0631959	0.167972	0.171988	0.619529	1
rs12126283	1	23585212	A	0.0612745	408	-0.0328813	-0.13814	0.811858	0.813587	0.385272	1
rs1212034	1	23587252	G	0.126536	407	0.0787791	0.098174	0.422296	0.426652	0.654535	0.997549
rs1767141	1	23606937	A	0.0909091	407	0.207526	0.110129	0.0595133	0.0619373	0.760715	0.997549
rs716243	1	23619212	G	0.25	408	0.00642168	0.0747	0.931493	0.932133	0.791863	1
rs7520038	1	23627409	A	0.0183824	408	-0.354083	-0.240443	0.140852	0.144609	1	1
rs1198430	1	23628100	A	0.0968137	408	0.109479	0.105726	0.300437	0.304983	0.248224	1
rs1198433	1	23629282	A	0.115196	408	0.0368704	0.100129	0.712702	0.715273	0.806604	1
rs1767148	1	23638059	A	0.0992647	408	0.130207	0.104781	0.213991	0.21831	0.264726	1
rs1077514	1	23638820	G	0.117647	408	0.0417424	0.0995056	0.674853	0.677724	0.811925	1
rs876583	1	23650261	A	0.0183824	408	-0.354083	-0.240443	0.140852	0.144609	1	1
rs2077066	1	23650949	G	0.305147	408	-0.00298063	-0.0699427	0.966008	0.966326	1	1
rs12122778	1	23688961	A	0.060049	408	0.095509	0.134106	0.476345	0.480482	0.647479	1
rs3218148	1	23724374	G	0.428922	408	-0.00644754	-0.0635227	0.919154	0.919908	0.420319	1
rs3218126	1	23729126	A	0.067402	408	-0.291366	-0.132255	0.0275899	0.0290764	0.240483	1
rs3218121	1	23730904	A	0.067402	408	-0.291366	-0.132255	0.0275899	0.0290764	0.240483	1
rs11574	1	23758085	A	0.308354	407	-0.0321616	-0.073263	0.66067	0.66365	0.0485242	0.997549
rs2076345	1	23956081	A	0.377451	408	0.0860177	0.0693295	0.214713	0.219036	0.0588455	1
rs17184588	1	24238099	A	0.492647	408	-0.13514	-0.0653501	0.0386456	0.0405028	0.488022	1
rs11586125	1	24249913	G	0.176904	407	0.00508929	0.0842202	0.951815	0.952265	0.866086	0.997549
rs4649163	1	24252188	A	0.296569	408	-0.148626	-0.0716348	0.0380072	0.0398445	0.406763	1
rs6424147	1	24254885	G	0.0379902	408	-0.127063	-0.170961	0.457344	0.461566	1	1
rs4378147	1	24287634	A	0.321078	408	-0.136639	-0.069428	0.049061	0.051219	0.733268	1
rs11249142	1	24294391	G	0.422794	408	0.102499	0.065056	0.115131	0.118572	0.91924	1
rs4292900	1	24342401	A	0.280637	408	-0.00876539	-0.0738694	0.905544	0.906424	0.269061	1
rs12131116	1	24371968	A	0.00367647	408	0.224907	0.53037	0.671524	0.674421	1	1
rs6680101	1	24380020	G	0.386935	398	0.0912251	0.0731992	0.21267	0.216982	0.00106848	0.97549
rs7532146	1	24383519	G	0.0465686	408	-0.147569	-0.156947	0.34709	0.351622	1	1
rs10794648	1	24390793	A	0.292892	408	0.105956	0.0719261	0.140719	0.144475	0.402654	1
rs7552167	1	24391230	A	0.156863	408	0.101481	0.0927283	0.273783	0.278299	0.062742	1
rs10489438	1	24578275	A	0.107843	408	-0.087295	-0.107285	0.41583	0.420208	0.202822	1
rs10489442	1	24621666	A	0.231618	408	0.0822352	0.0762928	0.281083	0.285611	0.889746	1
rs1008485	1	24637276	A	0.269608	408	0.110607	0.0709245	0.118878	0.12237	0.53201	1
rs12117331	1	24669425	G	0.22549	408	0.132422	0.0751576	0.0780816	0.0809091	0.570111	1
rs12064694	1	24688457	A	0.0919118	408	-0.0518356	-0.113576	0.648105	0.651179	0.557746	1
rs4601530	1	24916698	A	0.28799	408	0.00324977	0.06877	0.962309	0.962662	0.227101	1
rs4295833	1	25058373	A	0.115196	408	0.0236164	0.0997581	0.812861	0.814581	0.806604	1
rs17360973	1	25069864	A	0.0563725	408	0.210352	0.139439	0.131412	0.135062	1	1
rs6686594	1	25071869	G	0.468137	408	-0.0659844	-0.0640882	0.303203	0.307751	0.920902	1
rs11580498	1	25085260	C	0.355392	408	0.11732	0.0688472	0.088368	0.0913882	0.279594	1
rs7513064	1	25088618	G	0.169118	408	0.0684085	0.0804071	0.394893	0.399332	0.0129557	1
rs6663310	1	25094966	G	0.333333	408	0.0125913	0.0662666	0.849302	0.850696	0.316028	1
rs7536526	1	25102718	A	0.0625	408	0.17055	0.130944	0.192757	0.196955	0.663705	1
rs6688452	1	25109521	G	0.0906863	408	0.127055	0.112086	0.256985	0.261465	1	1
rs2236851	1	25116141	A	0.188725	408	-0.13646	-0.0765072	0.0744845	0.0772397	0.00895642	1
rs10903118	1	25167465	G	0.471814	408	0.0687262	0.0647199	0.28828	0.292816	0.766022	1
rs12144291	1	25203046	A	0.064951	408	0.150723	0.129171	0.243269	0.247709	0.682081	1
rs311469	1	25203998	A	0.241422	408	0.0608168	0.0792369	0.442766	0.447047	0.0421431	1
rs10794641	1	25249135	A	0.144608	408	0.0398758	0.0944717	0.672957	0.675843	0.227055	1
rs380149	1	25268346	G	0.398284	408	0.00544912	0.0657933	0.933993	0.93461	0.918004	1
rs7533661	1	25286053	A	0.0931373	408	-0.0745083	-0.111934	0.505636	0.509628	1	1
rs803302	1	25328122	A	0.00980392	408	0.00365755	0.328497	0.991116	0.9912	1	1
rs742393	1	25398468	A	0.169118	408	0.20059	0.0862899	0.0200931	0.0212875	0.72397	1
chr1:25398494	1	25398494	A	0.350123	407	0.0543775	0.0705802	0.441042	0.44533	0.102189	0.997549
chr1:25398502	1	25398502	G	0.207108	408	0.220267	0.0799795	0.00588633	0.00636676	0.546678	1
chr1:25399078	1	25399078	A	0.00122549	408	1.8785	0.911632	0.0393425	0.0412211	1	1
chr1:25400174	1	25400174	A	0.238971	408	0.154884	0.0715854	0.0304936	0.0320836	0.0761433	1
chr1:25400344	1	25400344	A	0.0269608	408	0.0370508	0.200586	0.853454	0.854811	1	1
rs7414501	1	25400368	A	0.102941	408	-0.0349877	-0.103436	0.73517	0.737557	0.414646	1
chr1:25400531	1	25400531	A	0.104167	408	-0.0331054	-0.103108	0.748154	0.750432	0.420687	1
rs2375278	1	25401625	A	0.177696	408	-0.0215619	-0.0831928	0.795496	0.797369	0.496987	1
chr1:25402906	1	25402906	C	0	408	NA	NA	NA	NA	1	1
chr1:25406181	1	25406181	G	0.0257353	408	-0.0586635	-0.196073	0.764794	0.766931	0.232037	1
chr1:25413819	1	25413819	A	0.162162	407	0.0428829	0.0851646	0.614592	0.617908	0.270958	0.997549
chr1:25414518	1	25414518	A	0.161765	408	0.043185	0.0851099	0.611872	0.615208	0.270619	1
chr1:25427306	1	25427306	A	0.0257353	408	0.0851608	0.196136	0.664149	0.667102	0.232037	1
chr1:25429691	1	25429691	A	0.0539216	408	0.269939	0.138783	0.051769	0.0539991	0.325728	1
chr1:25437801	1	25437801	T	0.00367647	408	-1.01387	-0.528947	0.0552671	0.0575868	1	1
chr1:25438792	1	25438792	A	0.0428922	408	0.147184	0.161616	0.36245	0.36696	1	1
chr1:25438884	1	25438884	A	0.0110294	408	-0.506043	-0.308553	0.100994	0.104226	1	1
rs1043879	1	25442668	G	0.246324	408	-0.0259155	-0.0763255	0.734204	0.736599	0.352931	1
chr1:25444638	1	25444638	A	0.0306373	408	0.0281811	0.189679	0.881891	0.882989	1	1
chr1:25457563	1	25457563	G	0.154412	408	0.0137219	0.0851092	0.871914	0.873103	0.0557927	1
chr1:25539334	1	25539334	A	0.0343137	408	-0.0441902	-0.172668	0.798009	0.799859	0.3809	1
chr1:25540075	1	25540075	G	0.0343137	408	-0.0441902	-0.172668	0.798009	0.799859	0.3809	1
chr1:25541301	1	25541301	G	0.455882	408	0.104395	0.0631992	0.0985682	0.101761	0.549364	1
chr1:25541644	1	25541644	C	0.158088	408	0.0112041	0.0839813	0.893867	0.894855	0.0389491	1
chr1:25545390	1	25545390	A	0.00735294	408	0.280883	0.376254	0.45535	0.459581	1	1
chr1:25545393	1	25545393	A	0.00247525	404	0.594888	0.649306	0.359567	0.364082	1	0.990196
rs3091242	1	25547372	G	0.457108	408	0.101937	0.0633553	0.107621	0.110954	0.617902	1
chr1:25553431	1	25553431	A	0.00490196	408	0.496272	0.459361	0.279985	0.284511	1	1
chr1:25555679	1	25555679	A	0.113971	408	-0.0386108	-0.0969386	0.690408	0.693158	0.0818741	1
chr1:25556599	1	25556599	G	0.457108	408	0.101937	0.0633553	0.107621	0.110954	0.617902	1
chr1:25559895	1	25559895	G	0.0475	400	0.289874	0.148286	0.0506038	0.0528031	0.21742	0.980392
chr1:25560329	1	25560329	A	0.0465686	408	-0.16568	-0.156409	0.289476	0.294014	1	1
chr1:25560488	1	25560488	G	0.455882	408	0.0874426	0.0629863	0.165051	0.169043	0.424678	1
rs9689	1	25560863	A	0.455882	408	0.0874426	0.0629863	0.165051	0.169043	0.424678	1
chr1:25568422	1	25568422	A	0.156863	408	0.00928828	0.0849001	0.912883	0.913695	0.0888948	1
chr1:25572293	1	25572293	A	0.0330882	408	0.0898852	0.183134	0.623556	0.626809	1	1
chr1:25577567	1	25577567	T	0.02457	407	-0.00862766	-0.210094	0.967244	0.96755	1	0.997549
chr1:25578011	1	25578011	A	0.0220588	408	-0.172356	-0.221159	0.435786	0.440095	1	1
chr1:25580279	1	25580279	A	0.0502451	408	-0.217265	-0.142896	0.128401	0.132014	0.26598	1
chr1:25582997	1	25582997	T	0.0122549	408	-0.171537	-0.293018	0.558269	0.561959	1	1
rs666686	1	25592098	A	0.453431	408	0.100586	0.0632552	0.111799	0.115193	0.549311	1
rs686631	1	25592186	A	0.453431	408	0.100586	0.0632552	0.111799	0.115193	0.549311	1
chr1:25608740	1	25608740	A	0.00857843	408	-0.0947433	-0.348872	0.785952	0.787908	1	1
chr1:25613434	1	25613434	A	0.454657	408	0.0856312	0.0634524	0.177165	0.181254	0.617801	1
chr1:25614937	1	25614937	G	0.00735294	408	-0.330056	-0.375929	0.379957	0.384433	1	1
rs4649084	1	25625204	A	0.454657	408	0.0856312	0.0634524	0.177165	0.181254	0.617801	1
rs11249248	1	25625638	A	0.454657	408	0.0856312	0.0634524	0.177165	0.181254	0.617801	1
chr1:25626152	1	25626152	G	0.457108	408	0.0840979	0.0637537	0.187134	0.191294	0.764722	1
chr1:25626225	1	25626225	G	0.454657	408	0.0856312	0.0634524	0.177165	0.181254	0.617801	1
chr1:25626612	1	25626612	C	0.425926	405	-0.0620452	-0.0652771	0.341864	0.346401	1	0.992647
rs909833	1	25626727	G	0.454657	408	0.0856312	0.0634524	0.177165	0.181254	0.617801	1
chr1:25627416	1	25627416	A	0.064951	408	-0.0426063	-0.129197	0.741568	0.743901	0.682081	1
rs932372	1	25627601	G	0.454657	408	0.0856312	0.0634524	0.177165	0.181254	0.617801	1
chr1:25628247	1	25628247	A	0.00857843	408	-0.0287953	-0.348858	0.934216	0.93483	1	1
chr1:25629447	1	25629447	A	0.454321	405	0.0856173	0.0636744	0.17875	0.182851	0.617687	0.992647
chr1:25631006	1	25631006	A	0.453431	408	0.0921882	0.0635943	0.147162	0.150985	0.689761	1
rs873308	1	25631242	G	0.453431	408	0.074679	0.0636838	0.240936	0.245367	0.689761	1
rs11802413	1	25633507	G	0.45098	408	0.0763178	0.0633941	0.228643	0.233028	0.549397	1
rs7541095	1	25633878	A	0.45098	408	0.0763178	0.0633941	0.228643	0.233028	0.549397	1
chr1:25634511	1	25634511	T	0.45098	408	0.0763178	0.0633941	0.228643	0.233028	0.549397	1
chr1:25635489	1	25635489	A	0.453431	408	0.074679	0.0636838	0.240936	0.245367	0.689761	1
chr1:25640196	1	25640196	G	0.45098	408	0.0763178	0.0633941	0.228643	0.233028	0.549397	1
rs10903129	1	25641524	A	0.45098	408	0.0763178	0.0633941	0.228643	0.233028	0.549397	1
chr1:25641808	1	25641808	T	0.45098	408	0.0763178	0.0633941	0.228643	0.233028	0.549397	1
chr1:25642269	1	25642269	C	0.0159314	408	-0.175467	-0.258486	0.497249	0.501284	1	1
chr1:25642296	1	25642296	A	0.00245098	408	-0.242511	-0.651549	0.709739	0.712334	1	1
chr1:25645613	1	25645613	A	0.002457	407	-0.242506	-0.652357	0.710088	0.712681	1	0.997549
chr1:25648269	1	25648269	T	0.449755	408	0.0794574	0.0635782	0.211388	0.215694	0.617956	1
rs12027135	1	25648320	T	0.45098	408	0.0763178	0.0633941	0.228643	0.233028	0.549397	1
chr1:25650693	1	25650693	G	0.453431	408	0.074679	0.0636838	0.240936	0.245367	0.689761	1
chr1:25651554	1	25651554	A	0.45086	407	0.0762137	0.063432	0.229556	0.233945	0.547983	0.997549
chr1:25653480	1	25653480	G	0.449755	408	0.0733811	0.0632867	0.246251	0.2507	0.485002	1
chr1:25654342	1	25654342	G	0.0208333	408	0.45839	0.225985	0.0425184	0.0444921	1	1
chr1:25656905	1	25656905	G	0.45098	408	0.0763178	0.0633941	0.228643	0.233028	0.549397	1
chr1:25658038	1	25658038	G	0.45098	408	0.0763178	0.0633941	0.228643	0.233028	0.549397	1
chr1:25658447	1	25658447	G	0.0171569	408	-0.144629	-0.232601	0.53408	0.537914	0.107207	1
chr1:25658502	1	25658502	A	0.0134804	408	-0.504446	-0.278638	0.070234	0.0729005	1	1
chr1:25660785	1	25660785	G	0.452088	407	0.0799999	0.0635222	0.207886	0.212173	0.616738	0.997549
chr1:25661012	1	25661012	A	0.453431	408	0.074679	0.0636838	0.240936	0.245367	0.689761	1
chr1:25661875	1	25661875	A	0.45098	408	0.0763178	0.0633941	0.228643	0.233028	0.549397	1
chr1:25662785	1	25662785	T	0.45098	408	0.0763178	0.0633941	0.228643	0.233028	0.549397	1
chr1:25667028	1	25667028	A	0.00245098	408	-0.242511	-0.651549	0.709739	0.712334	1	1
chr1:25667479	1	25667479	G	0.45098	408	0.0763178	0.0633941	0.228643	0.233028	0.549397	1
chr1:25670710	1	25670710	A	0.454657	408	0.072935	0.0635259	0.250921	0.255385	0.617801	1
chr1:25671638	1	25671638	A	0.0281863	408	-0.0719334	-0.196691	0.714576	0.717132	1	1
chr1:25672270	1	25672270	A	0.45098	408	0.0763178	0.0633941	0.228643	0.233028	0.549397	1
chr1:25672605	1	25672605	C	0.158025	405	-0.0514406	-0.0867881	0.553372	0.557091	0.456863	0.992647
chr1:25673377	1	25673377	A	0.45098	408	0.0777566	0.0634179	0.220162	0.22451	0.549397	1
chr1:25673996	1	25673996	A	0.452206	408	0.0745704	0.063234	0.238288	0.24271	0.484822	1
chr1:25674643	1	25674643	G	0.454657	408	0.072935	0.0635259	0.250921	0.255385	0.617801	1
chr1:25675682	1	25675682	G	0.452088	407	0.0740363	0.0632372	0.241691	0.246125	0.483486	0.997549
chr1:25675749	1	25675749	G	0.00245098	408	-0.242511	-0.651549	0.709739	0.712334	1	1
chr1:25677689	1	25677689	A	0.00245098	408	-0.242511	-0.651549	0.709739	0.712334	1	1
chr1:25679682	1	25679682	G	0.454657	408	0.072935	0.0635259	0.250921	0.255385	0.617801	1
chr1:25680062	1	25680062	A	0.0514706	408	-0.099008	-0.149779	0.508594	0.51257	0.614275	1
chr1:25681535	1	25681535	G	0.454657	408	0.072935	0.0635259	0.250921	0.255385	0.617801	1
chr1:25681644	1	25681644	G	0.452206	408	0.0745704	0.063234	0.238288	0.24271	0.484822	1
chr1:25683003	1	25683003	G	0.452206	408	0.0745704	0.063234	0.238288	0.24271	0.484822	1
chr1:25684075	1	25684075	G	0.113971	408	-0.0552785	-0.100854	0.58362	0.587148	0.629765	1
chr1:25684133	1	25684133	A	0.436275	408	0.104304	0.0634135	0.100008	0.103224	0.545714	1
chr1:25684315	1	25684315	A	0.00245098	408	-0.242511	-0.651549	0.709739	0.712334	1	1
chr1:25685446	1	25685446	G	0.452206	408	0.0745704	0.063234	0.238288	0.24271	0.484822	1
chr1:25685651	1	25685651	A	0.00490196	408	0.736786	0.458556	0.108108	0.111449	1	1
chr1:25689434	1	25689434	G	0.431373	408	-0.0531373	-0.0649283	0.413129	0.417516	0.919656	1
chr1:25690769	1	25690769	G	0.0159314	408	-0.0575098	-0.258034	0.823631	0.825255	1	1
chr1:25690985	1	25690985	A	0.453431	408	0.0865839	0.0630072	0.169382	0.17341	0.424617	1
chr1:25694258	1	25694258	A	0.45098	408	0.0763178	0.0633941	0.228643	0.233028	0.549397	1
chr1:25698178	1	25698178	G	0.00245098	408	-0.242511	-0.651549	0.709739	0.712334	1	1
chr1:25698543	1	25698543	G	0.449755	408	0.0768346	0.0632766	0.224646	0.229015	0.485002	1
chr1:25699089	1	25699089	G	0.449755	408	0.0768346	0.0632766	0.224646	0.229015	0.485002	1
chr1:25701317	1	25701317	A	0.0245098	408	0.0990436	0.199602	0.619749	0.623029	0.212244	1
chr1:25701666	1	25701666	A	0.00612745	408	-0.548745	-0.410922	0.181745	0.185868	1	1
chr1:25702575	1	25702575	A	0.449755	408	0.0768346	0.0632766	0.224646	0.229015	0.485002	1
chr1:25702818	1	25702818	A	0.0147059	408	0.25178	0.269146	0.349543	0.354072	1	1
chr1:25712768	1	25712768	G	0.0245098	408	-0.00853137	-0.209823	0.967567	0.96787	1	1
chr1:25713361	1	25713361	A	0.444853	408	0.0559324	0.063465	0.37815	0.38263	0.547472	1
chr1:25713790	1	25713790	G	0.443489	407	0.051186	0.0636781	0.421498	0.425857	0.54806	0.997549
chr1:25714218	1	25714218	A	0.444853	408	0.0559324	0.063465	0.37815	0.38263	0.547472	1
chr1:25717301	1	25717301	A	0.446078	408	0.0580984	0.0635765	0.360804	0.365316	0.616299	1
chr1:25722438	1	25722438	G	0.446078	408	0.0580984	0.0635765	0.360804	0.365316	0.616299	1
chr1:25722529	1	25722529	A	0.442402	408	0.0512345	0.0638862	0.422573	0.426928	0.6883	1
chr1:25722793	1	25722793	G	0.451128	399	0.0618546	0.0647545	0.339468	0.344008	0.613109	0.977941
chr1:25724564	1	25724564	G	0.428922	408	-0.0486748	-0.065041	0.454237	0.458471	0.919479	1
chr1:25725015	1	25725015	G	0.00245098	408	0.103757	0.653046	0.873763	0.874934	1	1
chr1:25725180	1	25725180	A	0.444853	408	0.0645773	0.0634396	0.30871	0.31326	0.547472	1
chr1:25725807	1	25725807	G	0.447304	408	0.0597108	0.0633875	0.346194	0.350727	0.5478	1
chr1:25727195	1	25727195	A	0.091133	406	-0.00680315	-0.11634	0.953369	0.953805	0.230436	0.995098
chr1:25727612	1	25727612	A	0.0294118	408	0.261235	0.193213	0.176356	0.180439	1	1
chr1:25727681	1	25727681	G	0.447304	408	0.0597108	0.0633875	0.346194	0.350727	0.5478	1
chr1:25728023	1	25728023	C	0.447304	408	0.0597108	0.0633875	0.346194	0.350727	0.5478	1
chr1:25729341	1	25729341	C	0.447304	408	0.0597108	0.0633875	0.346194	0.350727	0.5478	1
chr1:25729797	1	25729797	G	0.00857843	408	-0.413285	-0.348931	0.236243	0.240658	1	1
chr1:25730670	1	25730670	A	0.446078	408	0.0518017	0.0635916	0.415301	0.419681	0.616299	1
chr1:25731611	1	25731611	A	0.449755	408	0.0587401	0.0636448	0.35604	0.36056	0.617956	1
chr1:25733103	1	25733103	A	0.449755	408	0.0587401	0.0636448	0.35604	0.36056	0.617956	1
chr1:25735766	1	25735766	G	0.449755	408	0.0587401	0.0636448	0.35604	0.36056	0.617956	1
chr1:25736108	1	25736108	A	0.0318627	408	-0.0387089	-0.186306	0.835408	0.836927	1	1
chr1:25739380	1	25739380	A	0.497549	408	0.0628746	0.0646263	0.330605	0.335152	0.766398	1
chr1:25739882	1	25739882	A	0.0110294	408	0.17047	0.308396	0.580425	0.583973	1	1
chr1:25740702	1	25740702	A	0.0134804	408	-0.472329	-0.279246	0.0907517	0.0938138	1	1
chr1:25744217	1	25744217	G	0.0392157	408	-0.077841	-0.158143	0.622564	0.625824	0.11919	1
chr1:25744743	1	25744743	C	0.0404412	408	-0.0937601	-0.156233	0.548419	0.552169	0.132564	1
chr1:25745054	1	25745054	G	0.0526961	408	-0.194644	-0.140065	0.16463	0.168618	0.30538	1
chr1:25746651	1	25746651	G	0.0502451	408	-0.199041	-0.142856	0.16353	0.167508	0.26598	1
chr1:25747263	1	25747263	G	0.0379902	408	-0.0717995	-0.160476	0.654575	0.657601	0.106621	1
chr1:25747275	1	25747275	A	0.0502451	408	-0.199041	-0.142856	0.16353	0.167508	0.26598	1
chr1:25747713	1	25747713	G	0.0506173	405	-0.191118	-0.142591	0.18014	0.184251	0.268862	0.992647
chr1:25748237	1	25748237	A	0.0502451	408	-0.199041	-0.142856	0.16353	0.167508	0.26598	1
chr1:25748507	1	25748507	G	0.0502451	408	-0.199041	-0.142856	0.16353	0.167508	0.26598	1
chr1:25748756	1	25748756	C	0.0503686	407	-0.199096	-0.143045	0.163971	0.167953	0.266936	0.997549
chr1:25748832	1	25748832	C	0.0490196	408	-0.206195	-0.144227	0.152816	0.156695	0.247034	1
chr1:25748927	1	25748927	A	0.0367647	408	-0.0777626	-0.162511	0.632289	0.635479	0.0948637	1
chr1:25748996	1	25748996	G	0.0122549	408	-0.594951	-0.291721	0.0414053	0.0433461	1	1
chr1:25749050	1	25749050	G	0.0367647	408	-0.0777626	-0.162511	0.632289	0.635479	0.0948637	1
chr1:25749904	1	25749904	A	0.0367647	408	-0.0777626	-0.162511	0.632289	0.635479	0.0948637	1
chr1:25750079	1	25750079	A	0.0367647	408	0.217674	0.167374	0.193422	0.197625	0.424901	1
chr1:25750160	1	25750160	A	0.0906863	408	-0.000948985	-0.110873	0.993171	0.993235	0.760492	1
chr1:25750534	1	25750534	A	0.0502451	408	-0.199041	-0.142856	0.16353	0.167508	0.26598	1
chr1:25750867	1	25750867	G	0.0502451	408	-0.199041	-0.142856	0.16353	0.167508	0.26598	1
chr1:25750886	1	25750886	G	0.0496278	403	-0.207396	-0.144734	0.151872	0.155742	0.251605	0.987745
chr1:25751115	1	25751115	A	0.0135135	407	-0.526555	-0.278466	0.058636	0.0610388	1	0.997549
chr1:25751319	1	25751319	G	0.0502451	408	-0.199041	-0.142856	0.16353	0.167508	0.26598	1
chr1:25751566	1	25751566	C	0.0379902	408	-0.0308051	-0.160349	0.847653	0.849062	0.106621	1
chr1:25752174	1	25752174	G	0.0502451	408	-0.166334	-0.142904	0.24444	0.248884	0.26598	1
chr1:25752243	1	25752243	A	0.0392157	408	-0.0261393	-0.158389	0.868919	0.870135	0.11919	1
chr1:25752481	1	25752481	G	0.0134804	408	-0.621493	-0.277937	0.0253457	0.0267489	1	1
chr1:25752503	1	25752503	A	0.0441176	408	0.065931	0.146871	0.6535	0.656534	0.036124	1
chr1:25754387	1	25754387	A	0.0122549	408	-0.388345	-0.292729	0.184628	0.188771	1	1
chr1:25756367	1	25756367	A	0.0122549	408	-0.388345	-0.292729	0.184628	0.188771	1	1
chr1:25756429	1	25756429	A	0.0122549	408	0.198164	0.266806	0.457647	0.461868	0.0542698	1
chr1:25756721	1	25756721	C	0.0122549	408	0.198164	0.266806	0.457647	0.461868	0.0542698	1
chr1:25757079	1	25757079	G	0.443627	408	0.0474671	0.066813	0.477427	0.481559	0.229468	1
chr1:25757084	1	25757084	A	0.439951	408	0.0401057	0.0667131	0.547729	0.551483	0.269018	1
chr1:25758179	1	25758179	A	0.5	408	-0.0688799	-0.0633371	0.27681	0.281331	0.692737	1
chr1:25759640	1	25759640	A	0.00367647	408	0.922825	0.529568	0.0814032	0.0842951	1	1
chr1:25759817	1	25759817	A	0.00612745	408	-0.0727452	-0.413318	0.860292	0.861586	1	1
chr1:25760112	1	25760112	G	0.487745	408	0.0698416	0.0621993	0.261493	0.265984	0.235902	1
chr1:25760694	1	25760694	A	0.00735294	408	-0.889595	-0.373956	0.0173655	0.0184426	1	1
chr1:25761220	1	25761220	T	0.0147059	408	0.448724	0.267795	0.0938116	0.0969263	1	1
chr1:25762219	1	25762219	A	0.480392	408	0.0816481	0.0630951	0.195649	0.199865	0.619856	1
chr1:25762776	1	25762776	A	0.469363	408	0.0817929	0.0630833	0.194773	0.198984	0.551282	1
chr1:25763861	1	25763861	A	0	408	NA	NA	NA	NA	1	1
chr1:25764546	1	25764546	A	0.474265	408	0.0766743	0.063331	0.226014	0.230389	0.691276	1
chr1:25764567	1	25764567	A	0.0134804	408	-0.660559	-0.278028	0.0175075	0.0185909	1	1
rs3924486	1	25765467	C	0.4914	407	0.101608	0.0622905	0.102848	0.106109	0.275265	0.997549
chr1:25767864	1	25767864	A	0.0465686	408	-0.153268	-0.147308	0.298126	0.302671	0.210892	1
chr1:25767993	1	25767993	A	0.47549	408	0.078911	0.0631532	0.211476	0.215782	0.619644	1
rs3924234	1	25768186	A	0.507353	408	-0.096205	-0.0623724	0.122969	0.126514	0.323198	1
chr1:25768797	1	25768797	A	0.286765	408	-0.108562	-0.0721711	0.132521	0.136183	0.467479	1
chr1:25770218	1	25770218	G	0.0148883	403	0.452553	0.269011	0.0925133	0.0956058	1	0.987745
chr1:25771752	1	25771752	C	0.480392	408	0.0622012	0.0628464	0.322304	0.326854	0.487363	1
chr1:25772802	1	25772802	G	0.38848	408	-0.128427	-0.0670263	0.0553573	0.0576793	0.404246	1
chr1:25772827	1	25772827	A	0.1875	408	-0.0574574	-0.0809558	0.477866	0.481996	0.625173	1
chr1:25773301	1	25773301	A	0.00612745	408	-0.603284	-0.410667	0.141824	0.145591	1	1
chr1:25773513	1	25773513	A	0.0134804	408	-0.248798	-0.279492	0.37337	0.37786	1	1
chr1:25775955	1	25775955	G	0.186275	408	-0.126056	-0.0850106	0.13812	0.141847	0.250967	1
chr1:25776042	1	25776042	A	0.0110294	408	0.0340883	0.308636	0.912054	0.912874	1	1
chr1:25776816	1	25776816	G	0	408	NA	NA	NA	NA	1	1
chr1:25776978	1	25776978	G	0.0772059	408	-0.176047	-0.12077	0.144921	0.148721	1	1
chr1:25777369	1	25777369	G	0.177696	408	-0.155133	-0.0855573	0.0697996	0.0724568	0.398532	1
chr1:25779463	1	25779463	A	0.181818	407	-0.163783	-0.0854967	0.0554075	0.0577308	0.317327	0.997549
chr1:25780627	1	25780627	A	0.00367647	408	-0.651312	-0.52909	0.218322	0.222662	1	1
chr1:25780782	1	25780782	A	0.161765	408	-0.198528	-0.0880794	0.0241985	0.0255578	0.714285	1
chr1:25780828	1	25780828	A	0.171569	408	-0.131525	-0.0871802	0.131387	0.135036	0.383338	1
rs6685587	1	25879462	A	0.0477941	408	-0.0340163	-0.142499	0.811328	0.813061	0.0554551	1
rs2786875	1	25933853	A	0.0551471	408	-0.0726412	-0.132368	0.583156	0.586686	0.026518	1
rs807067	1	26069650	G	0.48652	408	-0.0182116	-0.0642279	0.776758	0.778793	0.921348	1
rs4659397	1	26130113	A	0.178922	408	0.0254195	0.0805308	0.752269	0.754512	0.09384	1
rs10902707	1	26139284	A	0.272059	408	-0.0343045	-0.0707493	0.627765	0.630988	0.531549	1
rs1469512	1	26181780	A	0.375	408	0.111118	0.0671381	0.0979111	0.101094	0.526702	1
rs933078	1	26196695	C	0.367647	408	0.111173	0.067736	0.100743	0.103971	0.396614	1
rs2275947	1	26256462	G	0.230392	408	-0.0465619	-0.0720551	0.518151	0.522075	0.0247526	1
rs2997447	1	26260010	A	0.204657	408	0.0181806	0.0771971	0.813814	0.815525	0.225822	1
rs2783711	1	26301451	A	0.16299	408	-0.0237124	-0.083664	0.776852	0.778886	0.144648	1
rs17257093	1	26308818	A	0.16299	408	-0.0237124	-0.083664	0.776852	0.778886	0.144648	1
rs2783637	1	26311813	A	0.16299	408	-0.0237124	-0.083664	0.776852	0.778886	0.144648	1
rs10794523	1	26365758	G	0.47549	408	0.028642	0.0650007	0.659472	0.662461	0.692065	1
rs11247867	1	26390478	A	0.181373	408	-0.141452	-0.0817808	0.0836923	0.0866273	0.616455	1
rs6699798	1	26429029	A	0.17402	408	0.151793	0.0846248	0.0728576	0.0755794	1	1
rs4072445	1	26536806	G	0.290441	408	0.0460476	0.0695468	0.507901	0.51188	0.548399	1
rs12137896	1	26585184	A	0.160539	408	0.0429921	0.0869507	0.620994	0.624266	0.854216	1
rs9438620	1	26588723	A	0.339461	408	-0.108016	-0.0679648	0.111993	0.11539	0.912095	1
rs11247954	1	26613872	A	0.0747549	408	-0.00810212	-0.12092	0.946579	0.947078	0.482147	1
rs7532866	1	26614131	G	0.355392	408	-0.0661556	-0.0664132	0.319191	0.323742	0.590037	1
rs2229714	1	26773295	A	0.158088	408	0.122751	0.0886192	0.166005	0.170004	0.852041	1
rs7726	1	26773906	A	0.276961	408	-0.0298763	-0.070558	0.671982	0.674876	0.536257	1
rs6668958	1	26774975	C	0.216216	407	0.180572	0.0768414	0.0187767	0.0199153	0.77032	0.997549
rs4970503	1	26779173	G	0.305147	408	-0.0116662	-0.0753086	0.876891	0.878034	0.00516064	1
rs566421	1	26782253	A	0.388206	407	-0.0254319	-0.0661588	0.700677	0.703345	1	0.997549
rs12746810	1	26885720	A	0.0870098	408	0.27775	0.111362	0.0126272	0.0134823	0.529569	1
rs12726287	1	26911815	A	0.0845588	408	0.286627	0.114205	0.0120814	0.0129091	1	1
rs12735646	1	26950953	A	0.0845588	408	0.286627	0.114205	0.0120814	0.0129091	1	1
rs12748152	1	27010980	A	0.0845588	408	0.286627	0.114205	0.0120814	0.0129091	1	1
rs7527776	1	27036922	A	0.409314	408	-0.167616	-0.0628048	0.00761147	0.00819677	0.260216	1
rs737524	1	27053416	C	0.370098	408	0.150408	0.0632517	0.01741	0.0184891	0.0893946	1
rs17162330	1	27108799	G	0.13848	408	0.185883	0.0876974	0.0340398	0.0357499	0.037167	1
rs12742376	1	27157782	A	0.0833333	408	0.265106	0.1149	0.0210391	0.0222726	0.751359	1
rs12751742	1	27163095	G	0.0845588	408	0.260549	0.112565	0.0206315	0.0218482	0.513989	1
rs870665	1	27172732	A	0.00735294	408	-0.165546	-0.376618	0.660256	0.66324	1	1
rs12410656	1	27270191	A	0.0772059	408	0.213159	0.120565	0.0770621	0.0798694	1	1
rs7530701	1	27448495	A	0.284314	408	0.156944	0.0684448	0.0218479	0.0231143	0.144979	1
rs17262181	1	27458775	A	0.0833333	408	0.33747	0.116689	0.00382734	0.00417031	1	1
rs12566737	1	27477448	A	0.00857843	408	-0.633398	-0.347341	0.068218	0.070841	1	1
rs12727507	1	27563231	G	0.346059	406	-0.00131034	-0.0681976	0.98467	0.984814	0.826326	0.995098
rs9438514	1	27625328	C	0.102941	408	-0.0297307	-0.101842	0.770339	0.77243	0.172524	1
rs6678647	1	27967090	C	0.0661765	408	0.0791302	0.130928	0.545591	0.549357	1	1
rs11247703	1	28076240	C	0.272059	408	-0.0239916	-0.0716827	0.737858	0.740222	0.803917	1
rs4357550	1	28164363	A	0.00614251	407	-0.106092	-0.412404	0.796983	0.798843	1	0.997549
rs6699701	1	28171538	A	0.328431	408	-0.102585	-0.0692503	0.138509	0.14224	0.574656	1
rs12144891	1	28217567	G	0.301471	408	-0.148563	-0.070367	0.03475	0.0364834	0.724239	1
rs558189	1	28405612	G	0.0318627	408	-0.121384	-0.185486	0.512848	0.516801	1	1
rs580800	1	28457800	G	0.303922	408	-0.0779844	-0.0679607	0.251178	0.255642	0.348707	1
rs508772	1	28462165	A	0.503676	408	0.047356	0.0635613	0.456245	0.460472	0.766967	1
rs512493	1	28509166	G	0.247549	408	0.0497932	0.0729291	0.494757	0.498805	0.426059	1
rs17163135	1	28521480	A	0.167076	407	0.0761447	0.0849407	0.370015	0.374511	0.591985	0.997549
rs11587757	1	28613008	G	0.357843	408	-0.0051138	-0.0661889	0.938416	0.938992	0.746484	1
rs9426420	1	28766159	A	0.0796569	408	-0.00186126	-0.121556	0.987783	0.987898	0.49617	1
rs6673481	1	28862857	C	0.285539	408	-0.0169063	-0.0697833	0.808572	0.810329	0.543746	1
rs11578325	1	28917710	G	0.454657	408	0.0508093	0.0616777	0.410061	0.414456	0.0896175	1
rs3753693	1	28933485	A	0.443627	408	0.0473269	0.0620887	0.445912	0.450181	0.132362	1
rs1338064	1	28995934	G	0.0980392	408	-0.126363	-0.112168	0.259932	0.264419	0.155665	1
rs204047	1	29017711	A	0.158477	407	0.0133104	0.0883192	0.880206	0.881319	1	0.997549
rs12749204	1	29048800	G	0.172794	408	-0.0359222	-0.0838431	0.668327	0.671248	0.491668	1
rs1485471	1	29067488	A	0.375	408	-0.00756556	-0.0653041	0.90777	0.90863	0.459967	1
rs203278	1	29114784	G	0.287469	407	0.021685	0.0724125	0.764585	0.766725	0.467403	0.997549
rs578800	1	29309693	A	0.057598	408	0.0763481	0.138624	0.581799	0.585338	1	1
rs575710	1	29319242	G	0.0588235	408	0.0825181	0.13739	0.548098	0.551849	1	1
rs547976	1	29375801	A	0.268382	408	-0.062596	-0.0706515	0.375627	0.380112	0.377517	1
rs3103882	1	29390880	A	0.117647	408	0.0572488	0.100219	0.56784	0.57147	1	1
rs1032425	1	29448192	A	0.142157	408	-0.0845418	-0.0919019	0.357618	0.362136	1	1
rs2235938	1	29505187	A	0.370098	408	-0.0690654	-0.0662237	0.29699	0.301535	1	1
rs12749276	1	29521776	A	0.057598	408	-0.0936782	-0.138565	0.499002	0.503028	1	1
rs4654312	1	29651568	G	0.448529	408	0.093962	0.0650125	0.148376	0.152211	0.763916	1
rs7514218	1	29653344	A	0.222359	407	-0.0199978	-0.0741419	0.787373	0.789316	0.0611212	0.997549
rs4654354	1	29666834	A	0.167892	408	-0.0789462	-0.0823971	0.338002	0.342544	0.111519	1
rs12097066	1	29740594	C	0.117647	408	-0.0435602	-0.0957324	0.649094	0.652161	0.145915	1
rs11582200	1	29914467	A	0.154412	408	-0.0175033	-0.0910215	0.847509	0.848919	0.445981	1
rs4949492	1	29943069	A	0.101716	408	0.0888976	0.107629	0.408827	0.413226	0.784686	1
rs4949477	1	30050255	G	0.495098	408	0.0037072	0.0642379	0.953979	0.95441	1	1
rs12120617	1	30090504	G	0.193627	408	0.0117821	0.0827651	0.886799	0.887852	0.529024	1
rs12039019	1	30127437	C	0.238971	408	0.0504983	0.0752749	0.502315	0.506324	1	1
rs10798942	1	30211325	G	0.251225	408	0.0149172	0.0752251	0.842809	0.844262	0.512952	1
rs17263039	1	30217566	G	0.0992647	408	-0.000854072	-0.107331	0.993651	0.99371	1	1
rs4949538	1	30275431	A	0.0526961	408	-0.0622731	-0.144184	0.665814	0.668755	1	1
rs746758	1	30309298	A	0.506127	408	0.0888987	0.064466	0.167894	0.171909	0.842971	1
rs267674	1	30323569	G	0.196078	408	0.150715	0.0798078	0.058962	0.0613728	0.639922	1
rs12049424	1	30427799	A	0.0759804	408	0.0259973	0.116217	0.822994	0.824624	0.070345	1
rs7516871	1	30459963	A	0.218673	407	-0.0350606	-0.0758603	0.643957	0.647062	0.31015	0.997549
rs1998012	1	30496077	G	0.0392157	408	0.0819757	0.1638	0.61675	0.620052	0.468695	1
rs10915079	1	30564112	A	0.308824	408	0.0589426	0.0713216	0.408558	0.412958	0.296806	1
rs437628	1	30583529	A	0.126225	408	0.0432891	0.100518	0.666714	0.669648	0.173868	1
rs10489163	1	30665013	G	0.245098	408	0.00680641	0.0757226	0.928378	0.929046	0.592599	1
rs1385325	1	30669488	G	0.496324	408	0.0435147	0.0650611	0.503605	0.507607	0.692	1
rs10915113	1	30671442	G	0.227941	408	0.0379963	0.0769793	0.621595	0.624862	0.887999	1
rs10158360	1	30716613	A	0.433824	408	-0.0379585	-0.0677511	0.575299	0.578881	0.08704	1
rs1484850	1	30760952	A	0.0968137	408	0.0410557	0.10654	0.699975	0.702648	0.565657	1
rs394402	1	30764370	A	0.237745	408	0.0926526	0.077887	0.234212	0.23862	0.217937	1
rs6692098	1	30770683	C	0.223039	408	-0.0330724	-0.0750268	0.659352	0.662342	0.316401	1
rs10914150	1	30848986	A	0.393382	408	0.0951196	0.0644681	0.140091	0.143839	0.535641	1
rs11589302	1	30872088	A	0.310049	408	0.0299517	0.0686804	0.662762	0.665726	0.728315	1
rs1323845	1	30886847	A	0.149877	407	0.0463775	0.091695	0.613011	0.616339	0.558202	0.997549
rs1212652	1	30915622	G	0.441176	408	0.0667785	0.0631887	0.290598	0.295137	0.269845	1
rs12750278	1	30951250	C	0.107843	408	-0.119907	-0.0978763	0.220541	0.224891	0.0367124	1
rs4949302	1	31033624	G	0.525735	408	-0.0526314	-0.0621439	0.397035	0.401469	0.164395	1
rs10798810	1	31049149	G	0.448529	408	-0.0498323	-0.0657349	0.448403	0.452662	0.483389	1
rs12117057	1	31074773	A	0.145833	408	-0.064079	-0.0941987	0.496344	0.500384	0.168028	1
rs6680621	1	31099553	A	0.346814	408	0.0426068	0.0674101	0.527352	0.531225	1	1
rs1473	1	31185506	A	0.0723039	408	0.158053	0.124214	0.203224	0.207486	1	1
rs4949327	1	31189891	A	0.367647	408	-0.00542286	-0.0699003	0.938162	0.93874	0.0560588	1
rs12404568	1	31249417	A	0.0661765	408	0.177507	0.133416	0.183359	0.187494	0.240981	1
rs1890020	1	31339425	A	0.430147	408	0.0709083	0.0635164	0.264261	0.268758	0.48055	1
rs12033303	1	31459125	A	0.246324	408	-0.097333	-0.0731295	0.1832	0.187333	0.593339	1
rs12409835	1	31461129	A	0.0269608	408	0.0345917	0.184159	0.851005	0.852384	0.0291791	1
rs2292165	1	31505479	A	0.189951	408	-0.0326043	-0.083826	0.697311	0.700006	0.518764	1
rs6659255	1	31642256	A	0.148284	408	-0.0652265	-0.0912979	0.474958	0.479101	0.845308	1
rs7546536	1	31693764	A	0.311275	408	-0.0150725	-0.0697331	0.828875	0.830452	1	1
rs10914435	1	31775314	A	0.0281863	408	0.169508	0.198992	0.394306	0.398746	1	1
rs10914436	1	31775381	A	0.0281863	408	0.169508	0.198992	0.394306	0.398746	1	1
rs2271928	1	31900540	A	0.414216	408	-0.0700115	-0.0640018	0.274	0.278516	0.415463	1
rs2050256	1	31977270	G	0.182598	408	-0.032098	-0.080892	0.691514	0.694255	0.248024	1
rs624017	1	32209855	G	0.160539	408	0.0402831	0.0893662	0.652159	0.655203	0.462305	1
rs7541800	1	32228602	A	0.0367647	408	-0.0823036	-0.167672	0.623525	0.626778	0.424901	1
rs2496	1	32613780	G	0.0367647	408	-0.0244068	-0.174157	0.888548	0.889584	1	1
rs10914571	1	32751825	A	0.0772059	408	-0.195313	-0.114677	0.0885392	0.0915624	0.0791084	1
rs11588497	1	32803048	G	0.212531	407	0.222693	0.0767669	0.00372088	0.00405628	0.656563	0.997549
rs601637	1	32923538	A	0.031941	407	0.169984	0.185258	0.358853	0.363369	1	0.997549
rs685235	1	33400928	A	0.256757	407	0.0510064	0.0751481	0.497299	0.501334	0.517464	0.997549
rs591664	1	33401828	A	0.00612745	408	-0.171451	-0.414036	0.678803	0.681643	1	1
rs10493052	1	33718272	A	0.159314	408	-0.173382	-0.0909185	0.0565207	0.0588718	0.138138	1
rs7532550	1	33760423	A	0.0928218	404	-0.137462	-0.11572	0.23488	0.23929	0.2317	0.990196
rs923882	1	33801657	A	0.291667	408	-0.0952795	-0.0710912	0.180166	0.184277	0.720808	1
rs729176	1	33815147	A	0.197789	407	-0.123993	-0.0816501	0.128865	0.132483	0.640372	0.997549
rs11580917	1	33823937	G	0.348039	408	0.11778	0.067202	0.079667	0.0825255	1	1
rs16835654	1	33831498	G	0.0563725	408	0.0808291	0.133808	0.5458	0.549565	0.125885	1
rs625757	1	33922472	G	0.0857843	408	0.0122219	0.111341	0.912592	0.913407	0.201196	1
rs649214	1	33923138	G	0.378676	408	-0.0403971	-0.0646917	0.532328	0.536173	0.344776	1
rs2480244	1	33925781	G	0.0833333	408	0.0232442	0.112427	0.836205	0.837717	0.181854	1
rs10914773	1	33987647	G	0.219363	408	0.0649095	0.0755868	0.390483	0.394934	0.314313	1
rs490109	1	33994397	A	0.220588	408	0.0132547	0.0777014	0.86455	0.865806	0.886066	1
rs12737807	1	34037971	C	0.51348	408	-0.0293206	-0.0630186	0.641739	0.64486	0.489427	1
rs12047802	1	34053012	A	0.140931	408	0.0216242	0.0922384	0.814645	0.816348	1	1
rs1358821	1	34091040	A	0.463145	407	-0.0356614	-0.0641347	0.578184	0.581747	0.920616	0.997549
rs7528354	1	34138998	G	0.414216	408	0.00833147	0.0644675	0.897172	0.898129	0.683918	1
rs560563	1	34217081	A	0.0404412	408	0.16067	0.160723	0.317469	0.32202	0.490381	1
rs10914850	1	34268681	G	0.0723039	408	0.0820276	0.126863	0.517902	0.521828	0.710346	1
rs7541388	1	34295000	A	0.0208333	408	-0.00746237	-0.22678	0.97375	0.973995	1	1
rs1842094	1	34379251	A	0.113971	408	0.123567	0.104903	0.238829	0.243253	0.14004	1
rs771147	1	34382325	A	0.110294	408	0.223873	0.105682	0.0341437	0.0358572	0.203079	1
rs10914879	1	34392797	G	0.338235	408	-0.0818432	-0.0690691	0.236039	0.240453	0.441043	1
rs297780	1	34421716	A	0.0257353	408	-0.149686	-0.206031	0.467518	0.471695	1	1
rs7535080	1	34426952	A	0.0404412	408	-0.180285	-0.166677	0.279412	0.283937	1	1
rs719769	1	34452906	A	0.207108	408	-0.018222	-0.0776868	0.814552	0.816257	0.45153	1
rs10799030	1	34458328	A	0.215686	408	-0.0115557	-0.0768793	0.880521	0.881631	0.558649	1
rs7512138	1	34499546	G	0.314951	408	-0.00877761	-0.0679763	0.897257	0.898213	0.422651	1
rs11588801	1	34534498	A	0.348039	408	-0.00678856	-0.0675183	0.919913	0.92066	0.913226	1
rs6661959	1	34812958	A	0.474265	408	-0.0176765	-0.0645839	0.784316	0.786286	0.921082	1
rs728448	1	34830688	A	0.133578	408	0.023408	0.0936474	0.802619	0.804429	0.673045	1
rs12059222	1	34864993	C	0.338235	408	0.108281	0.0677953	0.110226	0.113598	0.912402	1
rs12132123	1	34868239	A	0.181373	408	0.0923427	0.0878309	0.293089	0.297631	0.0435666	1
rs4652852	1	34886876	G	0.33701	408	0.179064	0.0669241	0.00745907	0.00803541	0.911802	1
rs4653072	1	34889206	A	0.20936	406	0.0709852	0.0833172	0.394221	0.398662	0.0504649	0.995098
rs509788	1	34890922	A	0.404412	408	-0.065002	-0.0664638	0.328071	0.332619	0.473195	1
rs10915019	1	34928653	G	0.313725	408	0.0106494	0.0718725	0.882208	0.883303	0.169592	1
rs4320749	1	34934389	A	0.490196	408	-0.00738476	-0.0647386	0.909182	0.910028	0.766282	1
rs12119977	1	34934459	A	0.270833	408	0.0652589	0.0764981	0.393616	0.398058	0.0324776	1
rs10489658	1	34958432	G	0.480392	408	0.0159462	0.0645051	0.804747	0.806538	0.843388	1
rs1570099	1	35071891	C	0.313725	408	0.0226073	0.0716336	0.75231	0.754553	0.169592	1
rs2064895	1	35077870	A	0.221814	408	-0.00627097	-0.0766332	0.934781	0.93539	0.774944	1
rs11263841	1	35081896	A	0.0698529	408	0.012737	0.130899	0.922485	0.923208	0.243516	1
rs4653107	1	35095090	A	0.126225	408	-0.0381365	-0.0959959	0.691167	0.693911	0.821718	1
rs4653109	1	35100832	G	0.345588	408	0.0261101	0.0649023	0.687465	0.690237	0.124994	1
rs4652867	1	35139877	A	0.267157	408	0.0517472	0.0713884	0.468533	0.472706	0.450237	1
rs10493064	1	35141601	A	0.156863	408	0.189942	0.0918537	0.0386513	0.0405086	0.187399	1
rs7552714	1	35351379	A	0.00122549	408	0.283648	0.919509	0.757719	0.759916	1	1
rs6702141	1	35425528	G	0.00245098	408	-0.238664	-0.649244	0.71317	0.715737	1	1
rs7543044	1	35446898	G	0.0735294	408	0.048694	0.123861	0.694221	0.696941	1	1
rs522821	1	35514250	A	0.0428922	408	0.175222	0.161541	0.278059	0.282582	1	1
rs12068951	1	35691196	G	0.0318627	408	0.1098	0.185357	0.553601	0.557319	1	1
rs11264164	1	35739501	G	0.0379902	408	0.0899058	0.170941	0.598925	0.60235	1	1
rs715998	1	35937213	G	0.0306373	408	0.113364	0.18879	0.548191	0.551942	1	1
rs636832	1	36136062	A	0.0759804	408	-0.0808893	-0.122014	0.50736	0.511343	1	1
rs522468	1	36426264	A	0.264706	408	0.0788492	0.0743692	0.289035	0.293572	0.444969	1
rs272822	1	36450172	A	0.0441176	408	-0.167295	-0.160465	0.297152	0.301696	1	1
rs11263875	1	36593514	A	0.106618	408	0.0444394	0.099554	0.65532	0.65834	0.110781	1
rs6692334	1	36600587	G	0.339461	408	0.0113165	0.0673443	0.866552	0.867789	0.825678	1
rs16822826	1	36647993	A	0.147059	408	-0.187559	-0.0882468	0.0335537	0.0352477	0.427293	1
rs2236565	1	36660289	G	0.386029	408	0.0355814	0.0670407	0.595597	0.599045	0.602261	1
rs3917950	1	36714338	G	0.22549	408	-0.153114	-0.0756473	0.0429646	0.0449514	0.776504	1
rs6667860	1	36730800	G	0.512255	408	0.0219385	0.0628241	0.726935	0.72939	0.323322	1
rs2144370	1	36791306	A	0.317402	408	0.0712292	0.0707295	0.313904	0.318455	0.423467	1
rs4026414	1	36794897	A	0.433824	408	-0.127595	-0.0636863	0.0451238	0.0471728	0.545386	1
rs16823188	1	36796378	G	0.181373	408	-0.0485186	-0.0821758	0.554907	0.558617	0.616455	1
rs12567252	1	36813944	C	0.107843	408	0.00875811	0.103443	0.932527	0.933157	0.798887	1
rs12072274	1	36848080	G	0.0992647	408	-0.00834566	-0.108696	0.938799	0.93937	0.783202	1
rs34305923	1	36916727	A	0.145833	408	0.00448773	0.0888467	0.959715	0.960092	0.324583	1
rs12022019	1	36942821	A	0.115196	408	-0.0461058	-0.102098	0.65157	0.654619	0.631037	1
rs12063010	1	36950998	A	0.111794	407	-0.032496	-0.104503	0.755832	0.758046	0.451564	0.997549
rs7537583	1	36976593	A	0.0833333	408	-0.0602131	-0.115659	0.602639	0.606039	0.751359	1
rs499230	1	37060524	A	0.158088	408	0.0274783	0.0897342	0.759438	0.761621	0.575456	1
rs4653233	1	37171023	A	0.129902	408	-0.160488	-0.0947955	0.0904574	0.0935145	1	1
rs4653235	1	37198462	A	0.302696	408	0.0535092	0.0708457	0.450073	0.454326	0.639536	1
rs3753771	1	37208062	G	0.284314	408	0.0669235	0.069321	0.334337	0.338881	0.331215	1
rs12138633	1	37250650	A	0.248775	408	0.000342653	0.073351	0.996273	0.996308	0.690773	1
rs822854	1	37258375	G	0.481572	407	-0.00362942	-0.0636644	0.954538	0.954963	0.619958	0.997549
rs12135742	1	37305358	A	0.132353	408	0.166971	0.0988253	0.0911124	0.0941808	0.0850768	1
rs218424	1	37307260	A	0.415441	408	-0.116216	-0.0624508	0.0627556	0.0652559	0.126563	1
rs215773	1	37368827	A	0.454657	408	-0.147728	-0.0631794	0.0193753	0.0205395	0.617801	1
rs12131641	1	37384100	A	0.256127	408	-0.0939518	-0.0736273	0.201939	0.206193	0.897223	1
rs1501540	1	37495665	A	0.370098	408	-0.0843289	-0.065017	0.194621	0.198831	0.395916	1
rs7516603	1	37545637	G	0.328431	408	-0.0689989	-0.0663983	0.298727	0.303273	0.262808	1
rs4653279	1	37580444	A	0.285539	408	0.0806316	0.0681682	0.236875	0.241292	0.114118	1
rs2745480	1	37639230	G	0.159705	407	0.063206	0.0856887	0.460743	0.46495	0.35394	0.997549
rs2282256	1	37693270	G	0.00980392	408	-0.220704	-0.327056	0.49979	0.503812	1	1
rs11577094	1	37799187	A	0.0906863	408	0.0817785	0.110491	0.459218	0.463432	0.760492	1
rs11583122	1	37826045	A	0.0906863	408	0.0817785	0.110491	0.459218	0.463432	0.760492	1
rs12742985	1	37889311	A	0.382353	408	0.0896872	0.0638874	0.160369	0.164318	0.208032	1
rs571153	1	37949631	G	0.490148	406	-0.0145159	-0.0630645	0.817955	0.81963	0.37284	0.995098
rs12124242	1	37958401	A	0.223039	408	-0.0325367	-0.0745175	0.662378	0.665345	0.197541	1
rs6671088	1	37958776	A	0.223039	408	-0.0325367	-0.0745175	0.662378	0.665345	0.197541	1
rs11264092	1	37963212	G	0.313725	408	0.00681481	0.0698973	0.922331	0.923056	0.729985	1
rs605359	1	38000803	A	0.153186	408	-0.112782	-0.0901227	0.210781	0.215083	0.702568	1
rs12563037	1	38031231	C	0.246324	408	-0.0642964	-0.0713688	0.367639	0.37214	0.108698	1
rs12739026	1	38174520	C	0.14951	408	-0.115717	-0.0889469	0.193268	0.19747	0.697938	1
rs17465826	1	38196108	C	0.0134804	408	0.511262	0.28042	0.0682729	0.070897	1	1
rs4072980	1	38228693	A	0.444853	408	0.0210239	0.064743	0.745387	0.747689	0.920367	1
rs11211085	1	38239284	A	0.327206	408	0.0488989	0.0696678	0.48275	0.486857	0.433463	1
rs7513555	1	38245103	G	0.501225	408	-0.0175445	-0.0637782	0.78325	0.785229	0.621351	1
rs11211383	1	38254943	C	0.285539	408	-0.0907614	-0.0708848	0.200402	0.204647	1	1
rs11205722	1	38290568	G	0.21201	408	0.0759568	0.0808953	0.347756	0.352287	0.23667	1
rs11578167	1	38297898	A	0.0477941	408	-0.0485559	-0.14609	0.73961	0.74196	0.228656	1
rs17466728	1	38301155	T	0.0330882	408	0.105979	0.182145	0.560675	0.56435	1	1
rs11205858	1	38302087	A	0.307598	408	0.0164138	0.0725486	0.821011	0.822658	0.162431	1
rs486563	1	38331636	A	0.113971	408	-0.0646777	-0.100119	0.518272	0.522196	0.629765	1
rs1108182	1	38331939	G	0.390931	408	-0.0255283	-0.0657914	0.698002	0.700692	1	1
rs1108183	1	38331981	G	0.420343	408	-0.0088401	-0.0652448	0.892224	0.893226	0.919048	1
rs544700	1	38332120	G	0.284314	408	-0.0986408	-0.0692601	0.154386	0.158281	0.331215	1
rs523864	1	38333555	G	0.154412	408	0.12888	0.0946399	0.173265	0.177324	0.00782524	1
rs12409682	1	38341610	A	0.0833333	408	0.0131791	0.120864	0.91317	0.91398	0.340428	1
rs7530333	1	38367260	G	0.0808824	408	-0.00693479	-0.121962	0.954657	0.955081	0.498841	1
rs16824722	1	38422644	C	0.115196	408	-0.110416	-0.0983763	0.261697	0.266188	0.462245	1
rs17534243	1	38423504	G	0.207108	408	0.00796881	0.0814176	0.922031	0.922758	0.365416	1
rs6600353	1	38457904	A	0.202206	408	0.011657	0.0810524	0.885642	0.886705	0.758534	1
rs2637882	1	38504834	A	0.313725	408	0.0566221	0.0706068	0.42259	0.426945	0.565086	1
rs12075234	1	38510801	G	0.419118	408	0.040669	0.0641333	0.525995	0.529875	0.684094	1
rs11586251	1	38672323	A	0.386029	408	0.0973477	0.0673486	0.148337	0.152172	0.348082	1
rs2252282	1	38690474	A	0.394349	407	-0.0426061	-0.0659816	0.518456	0.522378	1	0.997549
rs1329817	1	38709564	A	0.23652	408	0.0110913	0.0769249	0.885355	0.886421	0.494789	1
rs3011195	1	38849340	T	0.116422	408	-0.0308832	-0.10303	0.764368	0.766509	0.333207	1
rs1925379	1	38849442	A	0.0796569	408	-0.0277064	-0.117899	0.814208	0.815916	0.732219	1
rs11211039	1	38854820	G	0.105392	408	0.159366	0.10105	0.114772	0.118208	0.188376	1
rs17482903	1	38876548	A	0.064951	408	0.0161925	0.126769	0.89836	0.899307	0.23396	1
rs12119819	1	38953898	A	0.0134804	408	0.462533	0.278896	0.0972291	0.1004	1	1
rs9439072	1	39051415	A	0.264706	408	0.0058758	0.0698526	0.932963	0.933589	0.09982	1
rs11538784	1	39102287	A	0.13848	408	0.0559929	0.0925843	0.545327	0.549095	1	1
rs1984600	1	39264514	G	0.142157	408	-0.065421	-0.0910635	0.472505	0.476659	0.687909	1
rs12036597	1	39302307	G	0.122549	408	-0.0593028	-0.0968096	0.54016	0.543959	0.645833	1
rs7546735	1	39323208	G	0.281863	408	0.00976985	0.070515	0.889806	0.890831	0.713881	1
rs4660401	1	39330275	A	0.45098	408	-0.0560972	-0.0660044	0.39538	0.399818	0.483996	1
rs11580989	1	39356273	G	0.323529	408	0.11546	0.0677459	0.088323	0.0913423	0.820939	1
rs6600289	1	39386399	G	0.308824	408	-0.0853373	-0.0689922	0.21612	0.220449	0.816729	1
rs17502518	1	39409397	A	0.0465686	408	0.151232	0.152412	0.321073	0.325624	0.594797	1
rs6700698	1	39435241	A	0.252451	408	-0.00583321	-0.0718897	0.93533	0.935934	0.29492	1
rs663978	1	39452272	A	0.0306373	408	-0.144146	-0.181402	0.426834	0.431175	0.315514	1
rs2254542	1	39475701	A	0.0343137	408	-0.0738892	-0.172788	0.668921	0.671838	0.3809	1
rs16837533	1	39476434	A	0.186275	408	-0.103619	-0.0809314	0.200427	0.204672	0.516143	1
rs4660214	1	39504137	G	0.23652	408	-0.0400101	-0.0742981	0.590227	0.59371	0.583085	1
rs3818806	1	39520858	A	0.23652	408	-0.0400101	-0.0742981	0.590227	0.59371	0.583085	1
rs2039597	1	39522471	A	0.153186	408	0.0416635	0.0846684	0.622664	0.625923	0.0533808	1
rs1984143	1	39528904	G	0.300245	408	-0.0476811	-0.0703793	0.498097	0.502127	0.906571	1
rs2275186	1	39538642	G	0.300245	408	-0.0476811	-0.0703793	0.498097	0.502127	0.906571	1
rs16826069	1	39569642	G	0.242647	408	-0.0481114	-0.0742884	0.517225	0.521154	0.788054	1
rs11586824	1	39589749	G	0.126536	407	-0.0565317	-0.100779	0.574833	0.578418	0.174033	0.997549
rs636083	1	39594268	G	0.29902	408	-0.0429968	-0.0707827	0.543553	0.547332	0.813367	1
rs2296172	1	39608404	G	0.23652	408	-0.0415139	-0.0743062	0.576376	0.579951	0.583085	1
rs1180383	1	39618854	A	0.29902	408	-0.0482285	-0.0703703	0.493121	0.497177	1	1
rs645061	1	39667426	A	0.245098	408	0.0108913	0.0728021	0.881079	0.882184	0.349948	1
rs683135	1	39668047	A	0.300245	408	-0.0490439	-0.0703936	0.485985	0.490076	0.906571	1
rs587404	1	39681093	A	0.300245	408	-0.0490439	-0.0703936	0.485985	0.490076	0.906571	1
rs617577	1	39683271	G	0.0723039	408	-0.0230725	-0.124326	0.852773	0.854136	1	1
rs2296173	1	39685938	G	0.23652	408	-0.0415139	-0.0743062	0.576376	0.579951	0.583085	1
rs1775654	1	39722667	A	0.279412	408	-0.0178497	-0.071868	0.80385	0.805649	0.902424	1
rs6656934	1	39739305	A	0.0955882	408	-0.0353321	-0.111747	0.751866	0.754113	0.56195	1
rs1180341	1	39765395	A	0.442402	408	-0.0503509	-0.0661168	0.446332	0.450599	0.366904	1
rs9438922	1	39765525	A	0.00490196	408	0.126652	0.461549	0.783773	0.785747	1	1
rs9438923	1	39770392	G	0.00490196	408	0.126652	0.461549	0.783773	0.785747	1	1
rs4660293	1	39800767	G	0.253676	408	-0.0215996	-0.0752172	0.773988	0.776046	0.43507	1
rs17513135	1	39808273	A	0.254902	408	-0.0346199	-0.07521	0.645294	0.648389	0.434065	1
rs2242500	1	39810489	G	0.349265	408	-0.0212946	-0.0686945	0.756568	0.758776	0.447051	1
rs12130013	1	39811617	A	0.0857843	408	-0.0763023	-0.112924	0.499232	0.503257	0.521267	1
rs12037222	1	39837548	A	0.247549	408	-0.0238478	-0.0757586	0.752923	0.755161	0.506395	1
rs4660892	1	39877171	A	0.321078	408	-0.0521565	-0.0678245	0.441898	0.446183	0.650738	1
rs784622	1	39877401	G	0.105392	408	-0.10998	-0.102317	0.28242	0.286949	0.428026	1
rs3754353	1	39879101	G	0.0894608	408	0.10676	0.110481	0.333888	0.338432	0.351771	1
rs9662128	1	39922743	A	0.324755	408	0.0982024	0.067847	0.147782	0.151612	0.821857	1
rs12136257	1	39958528	C	0.160539	408	-0.0620785	-0.0860344	0.470569	0.474732	0.58151	1
rs17569868	1	40065498	C	0.181373	408	0.0146043	0.0796881	0.854588	0.855934	0.0666245	1
rs12127002	1	40157555	A	0.136029	408	-0.0635688	-0.0932563	0.495456	0.4995	0.833009	1
rs7521792	1	40175114	A	0.00857843	408	-0.462884	-0.348412	0.183996	0.188135	1	1
rs3103778	1	40206358	A	0.485294	408	0.0479131	0.0640359	0.454326	0.458561	0.843474	1
rs3131694	1	40229022	G	0.150735	408	-0.0405582	-0.0912048	0.656541	0.659552	0.846064	1
rs6699941	1	40243526	A	0.0710784	408	-0.0583559	-0.120372	0.627821	0.631044	0.134152	1
rs12038117	1	40431133	A	0.447304	408	-0.0272436	-0.0686765	0.691592	0.694333	0.0216922	1
rs2284447	1	40513065	A	0.0747549	408	-0.033402	-0.124729	0.788856	0.790786	0.714822	1
rs209587	1	40598187	G	0.0882353	408	-0.166116	-0.115772	0.151329	0.155194	0.756368	1
rs209580	1	40618568	G	0.351716	408	-0.0367485	-0.0667215	0.581788	0.585327	0.448065	1
rs209619	1	40677344	A	0.438725	408	0.0146684	0.0606194	0.8088	0.810555	0.00672303	1
rs3795348	1	40734036	G	0.0367647	408	-0.0528596	-0.167686	0.752587	0.754828	0.424901	1
rs6666654	1	40741650	A	0.0367647	408	-0.0528596	-0.167686	0.752587	0.754828	0.424901	1
rs11585667	1	40742252	A	0.00122549	408	0.491154	0.916561	0.592051	0.595523	1	1
rs3795347	1	40746743	G	0.192402	408	0.0342522	0.0785492	0.662793	0.665757	0.113579	1
rs3795344	1	40753817	A	0.0367647	408	-0.0528596	-0.167686	0.752587	0.754828	0.424901	1
rs16865685	1	40822024	G	0.0134804	408	0.281509	0.279499	0.313843	0.318394	1	1
rs16865687	1	40823820	G	0.0637255	408	-0.164348	-0.130089	0.206464	0.210743	0.672655	1
rs7520333	1	40862837	G	0.492611	406	-0.0334719	-0.0640134	0.601052	0.604462	0.921128	0.995098
rs2744805	1	40893086	A	0.213235	408	0.0533604	0.0805867	0.507876	0.511856	0.375326	1
rs2025897	1	41064964	A	0.0526961	408	-0.117367	-0.144065	0.415258	0.419637	1	1
rs17361735	1	41094957	A	0.0980392	408	-0.0346881	-0.109466	0.75133	0.753582	0.783428	1
rs11209170	1	41157217	G	0.422794	408	-0.098281	-0.0646528	0.128477	0.132091	1	1
rs11209376	1	41270935	G	0.235294	408	-0.135873	-0.0763157	0.0750089	0.0777749	0.783091	1
rs2802549	1	41273133	G	0.35049	408	-0.0919723	-0.0686786	0.180515	0.184629	0.446239	1
rs10789304	1	41359999	T	0.227941	408	0.0746458	0.0762279	0.327459	0.332007	0.780008	1
rs12118372	1	41388875	A	0.115196	408	0.0399567	0.103412	0.699212	0.701892	0.332503	1
rs1472570	1	41486671	C	0.463235	408	-0.0431581	-0.0645949	0.504048	0.508048	1	1
rs13374676	1	41513482	A	0.349265	408	-0.0981798	-0.0689283	0.154338	0.158232	0.328164	1
rs11209799	1	41528143	C	0.422794	408	0.0381669	0.0664704	0.565836	0.569478	0.361383	1
rs7525740	1	41657453	A	0.460784	408	0.0196355	0.0653719	0.763898	0.766043	0.76606	1
rs7534137	1	41682443	A	0.136029	408	-0.0637889	-0.0932214	0.493802	0.497855	0.833009	1
rs10890022	1	41692093	A	0.476716	408	-0.0174003	-0.0675411	0.796696	0.798558	0.0923387	1
rs3738577	1	41745936	A	0.0808824	408	0.0677244	0.118771	0.568534	0.572159	1	1
rs12031740	1	41803686	C	0.04914	407	-0.0116399	-0.152404	0.93912	0.939689	0.613056	0.997549
rs7519954	1	41808230	A	0.23652	408	-0.0959651	-0.0770268	0.212814	0.217127	0.494789	1
rs6689038	1	41815220	A	0.251225	408	0.0434464	0.0767995	0.571589	0.575195	0.148711	1
rs10890144	1	41857984	C	0.425245	408	-0.0370758	-0.0647697	0.567034	0.570669	1	1
rs1109255	1	41864295	G	0.477941	408	-0.00817668	-0.064626	0.899318	0.900255	0.843212	1
rs1409767	1	41879290	G	0.0870098	408	0.103168	0.114267	0.366594	0.371097	1	1
rs7517484	1	42023043	G	0.0526961	408	0.0823181	0.143859	0.567177	0.570811	1	1
rs972352	1	42070191	C	0.21201	408	-0.0135188	-0.0798312	0.865527	0.866774	0.55528	1
rs2993120	1	42123424	C	0.430147	408	0.117584	0.0624723	0.0598111	0.0622422	0.190073	1
rs811461	1	42133300	A	0.169533	407	0.077553	0.0850163	0.361656	0.366168	0.600277	0.997549
rs783622	1	42139575	A	0.477941	408	0.0421924	0.06401	0.509797	0.513767	0.920949	1
rs1320514	1	42143343	G	0.0196078	408	0.161725	0.233335	0.488245	0.492325	1	1
rs7515635	1	42180657	G	0.498775	408	-0.0622649	-0.0621135	0.316133	0.320684	0.138233	1
rs11210560	1	42233037	A	0.0980392	408	0.0652971	0.105008	0.534054	0.537888	0.255829	1
rs6703436	1	42283966	A	0.060049	408	-0.0289876	-0.133756	0.828427	0.830008	0.647479	1
rs3818727	1	42394232	A	0.102941	408	0.0767428	0.106548	0.471361	0.475521	1	1
rs12045477	1	42410750	A	0.272059	408	-0.0636336	-0.0717656	0.375247	0.379733	0.803917	1
rs624614	1	42420501	A	0.136029	408	0.0131879	0.0940392	0.888471	0.889509	1	1
rs17377240	1	42496837	C	0.313725	408	0.0455548	0.072595	0.530319	0.534175	0.0666253	1
rs16829262	1	42501462	C	0.403186	408	0.0202253	0.0647175	0.754648	0.756872	0.607082	1
rs913426	1	42578778	G	0.504902	408	0.0421875	0.064313	0.511842	0.515801	1	1
rs17369380	1	42600422	C	0.0330882	408	-0.273209	-0.182046	0.133416	0.137089	1	1
rs11587576	1	42608373	G	0.0551471	408	0.0405502	0.138266	0.769311	0.77141	0.346434	1
rs11210633	1	42626712	G	0.483911	404	0.0801754	0.0640886	0.210932	0.215235	0.766015	0.990196
rs4075750	1	42649844	A	0.151478	406	-0.0307122	-0.0913168	0.736625	0.739	0.703075	0.995098
rs12131762	1	42682130	G	0.351716	408	0.0533719	0.0663332	0.421048	0.425409	0.58791	1
rs1359292	1	42826846	A	0.0870098	408	-0.0255394	-0.115007	0.824261	0.82588	1	1
rs11576375	1	42912579	G	0.0551471	408	-0.125103	-0.138043	0.364797	0.369303	0.346434	1
rs10493113	1	42931097	A	0.117647	408	0.0363016	0.102064	0.722085	0.72458	0.631786	1
rs11581921	1	42988517	A	0.0761671	407	-0.0542512	-0.119596	0.650103	0.653163	0.718429	0.997549
rs17385526	1	43010618	G	0.281863	408	0.0571662	0.071522	0.424127	0.428477	1	1
rs4660234	1	43091859	A	0.109069	408	0.0334483	0.102752	0.744783	0.74709	1	1
rs12022524	1	43098795	A	0.28799	408	-0.0716001	-0.0717486	0.318314	0.322864	0.71798	1
rs1843115	1	43104727	G	0.290441	408	-0.0579037	-0.0719276	0.420804	0.425165	0.631316	1
rs17382631	1	43128798	A	0.191176	408	0.069859	0.0820322	0.394434	0.398874	0.873362	1
rs4660687	1	43150126	C	0.406863	408	-0.0630982	-0.0676968	0.3513	0.355826	0.218058	1
rs1098782	1	43153613	G	0.459559	408	-0.0620858	-0.0651884	0.340891	0.34543	0.691241	1
rs11586615	1	43158903	G	0.0845588	408	-0.193336	-0.116455	0.0968784	0.100044	0.755348	1
rs12718444	1	43181766	A	0.20098	408	0.0902539	0.0842346	0.283964	0.288495	0.0627214	1
rs751210	1	43183446	A	0.316176	408	-0.0874569	-0.0718396	0.223455	0.227819	0.13719	1
rs7522674	1	43189368	A	0.198529	408	0.0825991	0.0844134	0.327824	0.332372	0.0630186	1
rs4660698	1	43230975	A	0.32598	408	-0.0569668	-0.0703311	0.417952	0.422322	0.368073	1
rs7512851	1	43340720	A	0.00367647	408	0.18713	0.530927	0.724494	0.726969	1	1
rs12087752	1	43413660	G	0.265931	408	0.0958056	0.0711307	0.178014	0.18211	0.446579	1
rs622762	1	43468240	G	0.10049	408	0.138235	0.105185	0.188778	0.19295	0.583193	1
rs2484714	1	43472557	A	0.0551471	408	-0.0571177	-0.141093	0.685608	0.688396	1	1
rs10890246	1	43490665	G	0.437346	407	-0.0654375	-0.0629863	0.298844	0.30339	0.314004	0.997549
rs2784466	1	43524564	A	0.504902	408	-0.0584837	-0.0628831	0.352351	0.356876	0.429339	1
rs34783763	1	43530349	G	0.0980392	408	0.0102205	0.104809	0.922317	0.923042	0.255829	1
rs4141741	1	43615587	A	0.330882	408	0.0072141	0.0669974	0.914252	0.915051	0.502005	1
rs660899	1	43889593	A	0.302696	408	0.0326817	0.067149	0.626468	0.6297	0.127347	1
rs669446	1	43902366	A	0.303922	408	0.0279454	0.0669095	0.676196	0.679057	0.100738	1
rs10890283	1	44026732	A	0.464461	408	-0.00144711	-0.0618688	0.981339	0.981514	0.112062	1
rs246776	1	44047286	A	0.430147	408	-0.0811799	-0.0608493	0.182166	0.186292	0.0116643	1
rs2906457	1	44111162	A	0.284314	408	0.031712	0.0689307	0.645475	0.648569	0.22452	1
rs3791101	1	44138837	A	0.251225	408	-0.0596778	-0.070169	0.395054	0.399493	0.0347033	1
rs9429225	1	44258826	G	0.117647	408	0.132114	0.0993258	0.183482	0.187618	0.811925	1
rs16831558	1	44274750	A	0.126225	408	0.0152048	0.0931653	0.870359	0.871562	0.116538	1
rs2428965	1	44275496	A	0.343137	408	0.0714735	0.0681045	0.293963	0.298505	0.912534	1
rs4660763	1	44276163	A	0.289216	408	0.0592093	0.0722186	0.412295	0.416684	0.546782	1
rs12031261	1	44297263	A	0.214461	408	-0.0544367	-0.0805145	0.498971	0.502997	0.306164	1
rs11210969	1	44367634	A	0.330882	408	-0.0564163	-0.0681727	0.407925	0.412328	1	1
rs2429060	1	44376093	A	0.320639	407	0.0576027	0.070072	0.411048	0.415441	0.426567	0.997549
rs12401615	1	44408446	A	0.0355392	408	-0.303423	-0.176454	0.0855122	0.0884808	1	1
rs325150	1	44540500	A	0.0171569	408	0.440612	0.248211	0.0758727	0.0786562	1	1
rs325143	1	44546314	G	0.359069	408	-0.0184169	-0.0681	0.786823	0.788771	0.518445	1
rs161720	1	44563240	G	0.297794	408	-0.0315097	-0.0717913	0.660729	0.663709	0.346191	1
rs11210984	1	44577067	A	0.348039	408	0.0216064	0.0681768	0.751307	0.753559	0.662802	1
rs3866642	1	44658509	A	0.382353	408	0.016866	0.0668186	0.80072	0.802547	0.601986	1
rs6429540	1	44674872	A	0.272059	408	0.0507683	0.0711396	0.475447	0.479589	0.70742	1
rs6684444	1	44709099	C	0.0220588	408	0.252618	0.220544	0.25203	0.256496	1	1
rs11211006	1	44710561	A	0.226044	407	-0.0264208	-0.0790925	0.738342	0.740703	0.323246	0.997549
rs16832018	1	44752085	A	0.178922	408	-0.119355	-0.0820496	0.145762	0.149571	0.501246	1
rs16832028	1	44756771	A	0.126225	408	-0.132343	-0.0978637	0.176272	0.180354	0.654578	1
rs172018	1	44791402	A	0.254902	408	0.0211235	0.0742785	0.776117	0.778158	0.794426	1
rs10890311	1	44840355	A	0.185049	408	0.152265	0.0860351	0.0767606	0.0795619	0.137881	1
rs12057238	1	45030728	C	0.188725	408	-0.109659	-0.0827661	0.185196	0.189344	0.746559	1
rs11211037	1	45048138	C	0.404412	408	-0.0678097	-0.0652117	0.298414	0.30296	1	1
rs7525308	1	45066105	G	0.397059	408	-0.0575841	-0.0652428	0.377446	0.381927	0.917669	1
rs11211059	1	45202805	A	0.247549	408	0.0202343	0.0752184	0.787924	0.789862	0.690251	1
rs4660834	1	45285806	A	0.148284	408	-0.0894371	-0.0951612	0.347295	0.351827	0.0743264	1
rs6688318	1	45286139	G	0.148284	408	-0.0894371	-0.0951612	0.347295	0.351827	0.0743264	1
rs11211086	1	45483358	A	0.420343	408	0.0743842	0.066144	0.260767	0.265256	0.476763	1
rs6429562	1	45536845	A	0.270833	408	-0.132913	-0.0712488	0.0621154	0.0646008	0.616335	1
rs12094184	1	45539038	A	0.0992647	408	-0.0958497	-0.108532	0.377157	0.381639	0.783202	1
rs2153608	1	45586528	G	0.252451	408	-0.0296411	-0.072604	0.683085	0.685892	0.432113	1
rs12137389	1	45710973	A	0.0159314	408	-0.234782	-0.257881	0.362596	0.367106	1	1
rs622798	1	45787858	C	0.443627	408	-0.0304606	-0.0649141	0.638895	0.642037	0.841311	1
rs2088102	1	45805561	G	0.487715	407	-0.103467	-0.065712	0.115359	0.118803	0.372636	0.997549
rs2275084	1	45858226	C	0.00982801	407	-0.354657	-0.326545	0.27744	0.281962	1	0.997549
rs3014238	1	45862801	G	0.485294	408	-0.0888746	-0.0657386	0.176395	0.180478	0.372184	1
rs3014237	1	45862839	A	0.258578	408	0.0696443	0.0724888	0.336673	0.341215	0.698244	1
rs4660880	1	45883627	A	0.273284	408	0.087003	0.0706552	0.218183	0.222522	0.383588	1
rs4626927	1	46021232	A	0.457108	408	-0.0819538	-0.0673794	0.223869	0.228235	0.0730536	1
rs7524495	1	46039519	G	0.449755	408	-0.0779894	-0.0669365	0.243968	0.24841	0.16113	1
rs6686134	1	46150855	G	0.449755	408	-0.0779894	-0.0669365	0.243968	0.24841	0.16113	1
rs4076006	1	46210663	A	0.449755	408	-0.0779894	-0.0669365	0.243968	0.24841	0.16113	1
rs946527	1	46258557	A	0.269608	408	0.0770001	0.0703985	0.274054	0.27857	0.207851	1
rs2275426	1	46260139	A	0.449755	408	-0.0779894	-0.0669365	0.243968	0.24841	0.16113	1
rs1707322	1	46277734	A	0.269608	408	0.0557195	0.0699866	0.425948	0.430291	0.130513	1
rs1768816	1	46301186	G	0.45086	407	-0.0644774	-0.0667946	0.334391	0.338934	0.19417	0.997549
rs3855959	1	46406461	A	0.382353	408	-0.1161	-0.0680775	0.0881184	0.0911342	0.250965	1
rs7520850	1	46656255	A	0.101716	408	-0.0361387	-0.107794	0.737431	0.739799	0.784686	1
rs11211276	1	46678389	A	0.240786	407	-0.0101965	-0.0734479	0.889588	0.890615	0.344665	0.997549
rs12567374	1	46746041	A	0.00490196	408	-0.460947	-0.459504	0.315794	0.320345	1	1
rs942255	1	46762379	A	0.207108	408	0.0116567	0.0821277	0.887132	0.888181	0.226853	1
rs1440491	1	46965645	A	0.256127	408	-0.10201	-0.0757193	0.177913	0.182007	0.243821	1
rs648028	1	46983825	C	0.0220588	408	-0.275083	-0.220154	0.211481	0.215787	1	1
rs594387	1	46985973	G	0.185049	408	0.00584818	0.0801183	0.941811	0.942354	0.189216	1
rs694194	1	46987812	C	0.185049	408	0.00584818	0.0801183	0.941811	0.942354	0.189216	1
rs17449603	1	47006320	G	0.0784314	408	0.0931465	0.120524	0.439613	0.443906	1	1
rs4646485	1	47051426	G	0.38848	408	-0.0519323	-0.0648703	0.423388	0.427741	0.60365	1
rs1553390	1	47265380	G	0.279412	408	-0.0739444	-0.075586	0.327935	0.332482	0.0361754	1
rs2245116	1	47418433	C	0.447304	408	0.167906	0.0646722	0.00942455	0.0101126	0.920602	1
rs2248907	1	47428403	A	0.230392	408	-0.0315514	-0.0787039	0.688503	0.691267	0.262876	1
rs12760654	1	47441912	A	0.198529	408	-0.0813609	-0.0792135	0.304369	0.308918	0.535064	1
rs977747	1	47457264	A	0.390931	408	-0.0775965	-0.0640285	0.225548	0.229921	0.349603	1
rs2984618	1	47463025	A	0.390931	408	-0.0775965	-0.0640285	0.225548	0.229921	0.349603	1
rs2845	1	47466667	A	0.0490196	408	-0.0716054	-0.144465	0.620135	0.623413	0.247034	1
rs1028646	1	47490945	G	0.432598	408	0.0873162	0.0650369	0.179413	0.183519	0.840336	1
rs2821096	1	47515313	A	0.4375	408	0.0839301	0.0652688	0.198473	0.202707	0.762741	1
rs6588196	1	47516077	A	0.397059	408	-0.074482	-0.0659487	0.258732	0.263216	0.836443	1
rs2820986	1	47605452	C	0.265931	408	0.0368285	0.0742736	0.620001	0.623279	0.527118	1
rs2622911	1	47609991	C	0.00612745	408	-0.316758	-0.413824	0.444008	0.448285	1	1
rs517384	1	47725250	A	0.126225	408	-0.00591936	-0.0960972	0.950883	0.951342	0.821718	1
rs17103391	1	47773921	A	0.0232843	408	-0.254793	-0.214642	0.235203	0.239614	1	1
rs1508603	1	47804420	A	0.0171569	408	0.587438	0.247604	0.0176684	0.0187589	1	1
rs12094838	1	47823157	A	0.348039	408	0.0367567	0.0690171	0.594329	0.597785	0.383008	1
rs1108866	1	47832676	A	0.0526961	408	0.175017	0.143611	0.222963	0.227324	1	1
rs1108865	1	47832696	A	0.0526961	408	0.175017	0.143611	0.222963	0.227324	1	1
rs10493129	1	47844572	A	0.0232843	408	0.0151167	0.214917	0.943925	0.944449	1	1
rs11577726	1	47854425	G	0.213235	408	-0.0382209	-0.0797033	0.631554	0.63475	0.554839	1
rs11211576	1	47864335	A	0.484069	408	-0.138584	-0.0624884	0.026572	0.0280211	0.374245	1
rs4926925	1	47886385	G	0.0183824	408	-0.114193	-0.241643	0.63652	0.63968	1	1
rs12565582	1	47931098	A	0.0490196	408	-0.130624	-0.148958	0.38053	0.385005	1	1
rs1561573	1	48000530	A	0.469363	408	0.0148661	0.063469	0.814809	0.816511	0.551282	1
rs12085966	1	48001982	A	0.137255	408	-0.0121375	-0.0958045	0.899186	0.900124	0.399944	1
rs3844086	1	48005090	A	0.362745	408	0.0245235	0.0679999	0.718369	0.720894	0.593961	1
rs11211609	1	48055254	G	0.0857843	408	-0.0491926	-0.116633	0.673192	0.676076	0.754979	1
rs17299092	1	48347697	T	0.0710784	408	-0.146568	-0.124925	0.240695	0.245126	1	1
rs7518922	1	48614894	A	0.194853	408	-0.106464	-0.0797852	0.182077	0.186202	0.636133	1
rs12024734	1	48737857	A	0.386978	407	-0.0207089	-0.0677491	0.759855	0.762035	0.464662	0.997549
rs1418952	1	48751102	G	0.0637255	408	-0.253127	-0.132801	0.0566425	0.0589966	1	1
rs2246670	1	48775461	C	0.285539	408	-0.00857452	-0.0694534	0.901745	0.90266	0.395239	1
rs17104533	1	48819733	G	0.142157	408	-0.116366	-0.0940957	0.216207	0.220537	0.540313	1
rs11579440	1	48825010	G	0.160539	408	-0.0150189	-0.0906213	0.868368	0.869589	0.268796	1
rs319978	1	48839966	A	0.199755	408	0.0312336	0.0757386	0.680056	0.682887	0.0197865	1
rs319977	1	48840667	G	0.0208333	408	-0.181131	-0.213905	0.397116	0.401549	0.156435	1
rs12096331	1	48993943	G	0.104167	408	-0.0913119	-0.105813	0.38816	0.392617	1	1
rs11586913	1	48994486	A	0.104167	408	-0.0913119	-0.105813	0.38816	0.392617	1	1
rs2298200	1	49133987	A	0.164216	408	0.0731985	0.0853778	0.391252	0.395701	0.470482	1
rs1343424	1	49149407	G	0.213235	408	0.128612	0.0769512	0.0946539	0.0977827	0.461828	1
rs10493139	1	49179984	G	0.114532	406	-0.152685	-0.0989815	0.122938	0.126483	0.458166	0.995098
rs3127553	1	49210592	G	0.340686	408	0.00303798	0.0666524	0.963645	0.963985	0.440557	1
rs657452	1	49362434	A	0.363636	407	-0.0230382	-0.0651235	0.723518	0.726001	0.284087	0.997549
rs2982389	1	49580475	C	0.0502451	408	0.2259	0.146278	0.122512	0.126051	1	1
rs7531656	1	49601250	A	0.303922	408	0.028555	0.0713497	0.689001	0.691762	0.415218	1
rs1766377	1	49689671	G	0.204657	408	0.0643842	0.0807752	0.425405	0.429751	0.647943	1
rs946106	1	49701076	G	0.204657	408	0.0643842	0.0807752	0.425405	0.429751	0.647943	1
rs2211454	1	49917435	T	0.04914	407	0.219107	0.14801	0.13878	0.142513	1	0.997549
rs1474910	1	49964737	G	0.203202	406	0.0514834	0.0803705	0.521799	0.525703	0.87934	0.995098
rs12128108	1	50066008	A	0.205882	408	0.0712964	0.0801117	0.373486	0.377976	0.763807	1
rs9659092	1	50216176	A	0.418919	407	-0.00320643	-0.0660484	0.961281	0.961643	0.683949	0.997549
rs4259707	1	50301178	A	0.208333	408	0.065353	0.0800442	0.414237	0.418619	0.763659	1
rs11583200	1	50332407	G	0.363971	408	0.038924	0.0677314	0.565506	0.56915	0.592762	1
rs12024093	1	50401438	A	0.207108	408	0.115854	0.0785435	0.140206	0.143955	0.880303	1
rs12734294	1	50410609	A	0.0612745	408	-0.0327922	-0.135515	0.808794	0.810549	1	1
rs12043872	1	50417478	A	0.0526961	408	-0.384812	-0.142582	0.00695727	0.00750372	1	1
rs11576734	1	50447146	G	0.0343137	408	-0.0183043	-0.173064	0.915768	0.916554	0.3809	1
rs4926853	1	50481809	G	0.318627	408	0.0423053	0.0688811	0.539097	0.542902	1	1
rs17386142	1	50588370	A	0.064951	408	0.0954198	0.124738	0.444293	0.448569	0.0785525	1
rs7525764	1	50617284	G	0.482843	408	-0.00489535	-0.0646835	0.939672	0.940236	0.921002	1
rs17363904	1	50664637	A	0.27451	408	0.0512954	0.0716386	0.473973	0.478121	1	1
rs17106184	1	50682573	A	0.0919118	408	-0.334222	-0.112789	0.00304416	0.00333003	0.557746	1
rs12747336	1	50752629	G	0.0355392	408	0.270868	0.176725	0.125348	0.128923	1	1
rs1846522	1	50753793	A	0.0919118	408	-0.329651	-0.112923	0.0035085	0.00382862	0.557746	1
rs11585301	1	50893627	G	0.064951	408	-0.00407222	-0.129587	0.974931	0.975166	0.682081	1
rs6588391	1	50897748	A	0.0968137	408	0.0721967	0.106643	0.498409	0.502438	0.565657	1
rs12086130	1	50946191	A	0.0909091	407	-0.338681	-0.113495	0.00284398	0.00311469	0.55853	0.997549
rs12090545	1	50966572	G	0.0919118	408	-0.329651	-0.112923	0.0035085	0.00382862	0.557746	1
rs6691061	1	51007607	G	0.393382	408	-0.103226	-0.0647161	0.110698	0.114076	0.535641	1
rs12089747	1	51018743	A	0.0919118	408	-0.329651	-0.112923	0.0035085	0.00382862	0.557746	1
rs3789588	1	51039111	A	0.0906863	408	-0.312554	-0.11357	0.0059219	0.00640457	0.558717	1
rs4926873	1	51176183	G	0.392157	408	-0.100431	-0.0649774	0.122193	0.125728	0.67778	1
rs12088739	1	51279474	G	0.0894608	408	-0.312208	-0.114149	0.00623642	0.00673878	0.758098	1
rs12565180	1	51335302	G	0.0626536	407	-0.216055	-0.128612	0.0929778	0.0960782	0.200465	0.997549
rs953825	1	51345507	C	0.0147059	408	0.363203	0.267494	0.174527	0.178596	1	1
rs4926884	1	51472314	A	0.129902	408	-0.104393	-0.095106	0.272359	0.276872	1	1
rs17106459	1	51481522	G	0.0330882	408	0.0742738	0.182453	0.683945	0.686746	1	1
rs474668	1	51523497	A	0.338235	408	-0.0177992	-0.0703187	0.800174	0.802006	0.152007	1
rs7538988	1	51590129	G	0.0379902	408	0.0240642	0.171313	0.888289	0.889328	1	1
rs12062229	1	52000441	A	0.133578	408	-0.0146658	-0.0934755	0.875328	0.876485	0.673045	1
rs4422953	1	52083470	G	0.487745	408	-0.0634771	-0.0633548	0.316377	0.320928	0.553504	1
rs2809944	1	52190126	G	0.334559	408	-0.0810192	-0.0672584	0.228359	0.232744	0.656295	1
rs1935294	1	52196546	A	0.335784	408	-0.0861227	-0.0669119	0.198057	0.202288	0.506395	1
rs10888744	1	52204400	C	0.257353	408	0.161015	0.0725345	0.0264298	0.0278737	0.796052	1
rs11205934	1	52388265	C	0.00980392	408	0.235163	0.326952	0.471981	0.476138	1	1
rs17401875	1	52405215	A	0.139706	408	-0.164375	-0.0920892	0.074269	0.0770198	1	1
rs4394585	1	52485622	G	0.335784	408	0.0743892	0.0663421	0.262161	0.266653	0.375629	1
rs2180768	1	52490409	A	0.153186	408	-0.0478889	-0.0886216	0.588938	0.59243	0.848846	1
rs2753399	1	52546945	A	0.400491	407	-0.121142	-0.0653215	0.0636609	0.066182	1	0.997549
rs3087473	1	52640427	C	0.00857843	408	-0.268457	-0.348744	0.441429	0.445716	1	1
rs17107212	1	52660707	A	0.13848	408	-0.111805	-0.0924298	0.226424	0.2308	1	1
rs970917	1	52680868	A	0.246324	408	-0.11589	-0.0744952	0.119788	0.123291	0.894623	1
rs12080399	1	52736167	G	0.247549	408	-0.111742	-0.0745215	0.133754	0.13743	0.894343	1
rs7553627	1	52759566	A	0.246929	407	-0.111903	-0.0746793	0.134016	0.137696	0.894469	0.997549
rs835036	1	52769828	G	0.334559	408	0.0466843	0.0663636	0.481768	0.485879	0.373314	1
rs12022581	1	52773836	G	0.139706	408	-0.104969	-0.0922658	0.255252	0.259727	1	1
rs17373654	1	52777500	G	0.0514706	408	-0.192904	-0.144919	0.183149	0.187282	1	1
rs835337	1	52831694	A	0.292383	407	-0.0642665	-0.0690004	0.351651	0.356177	0.47203	0.997549
rs835338	1	52834354	A	0.292383	407	-0.0639965	-0.0695787	0.357692	0.36221	0.631654	0.997549
rs6671552	1	52854173	G	0.0526961	408	-0.0716166	-0.147696	0.627754	0.630977	0.616366	1
rs6670797	1	52870169	A	0.305147	408	-0.0634279	-0.071663	0.37611	0.380594	0.293158	1
rs12067454	1	52909916	A	0.392157	408	-0.0863019	-0.0657395	0.189255	0.19343	0.917534	1
rs443751	1	52926020	G	0.39312	407	-0.0884841	-0.0655435	0.177014	0.181102	1	0.997549
rs448788	1	52934208	A	0.51348	408	-0.0264695	-0.0624318	0.671584	0.674481	0.277319	1
rs2275758	1	53149713	A	0.0281863	408	0.372752	0.187087	0.0463276	0.0484105	0.27304	1
rs7544995	1	53220960	G	0.107843	408	-0.0430223	-0.103021	0.676235	0.679096	0.798887	1
rs11206087	1	53316877	A	0.0355392	408	0.210769	0.17654	0.23252	0.236921	1	1
rs3766775	1	53340134	A	0.291667	408	0.105854	0.069682	0.128738	0.132356	0.631468	1
rs1288371	1	53349180	A	0.317402	408	-0.0271604	-0.0736656	0.712352	0.714927	0.0226251	1
rs3766781	1	53351770	A	0.295343	408	-0.000110864	-0.0735855	0.998798	0.998809	0.152758	1
rs899976	1	53366401	A	0.208333	408	-0.0351104	-0.0807096	0.663547	0.666505	0.54745	1
rs1679933	1	53384287	G	0.421569	408	0.0242318	0.0642935	0.706252	0.708876	0.612623	1
rs10888768	1	53388129	G	0.435049	408	0.00397114	0.0633643	0.950028	0.950495	0.364498	1
rs1288351	1	53396926	A	0.106618	408	0.09134	0.106365	0.390482	0.394933	0.601157	1
rs17785382	1	53480541	G	0.449755	408	0.0166121	0.062157	0.789269	0.791196	0.0897693	1
rs867884	1	53539560	G	0.38848	408	0.0718754	0.0646229	0.26604	0.270541	0.467319	1
rs11206152	1	53603683	C	0.32598	408	-0.0530107	-0.0710449	0.455572	0.459802	0.176649	1
rs6588477	1	53609775	A	0.0882353	408	0.0536513	0.111583	0.630646	0.633848	0.538831	1
rs17108398	1	53618573	A	0.284314	408	-0.0498674	-0.0728694	0.49376	0.497813	0.39441	1
rs6588478	1	53626121	G	0.447304	408	-0.0285716	-0.063407	0.652273	0.655316	0.5478	1
rs1288612	1	53732646	A	0.0477941	408	-0.136181	-0.145873	0.350532	0.35506	0.228656	1
rs943519	1	53738134	G	0.0465686	408	-0.135226	-0.151358	0.371634	0.376127	0.594797	1
rs519786	1	53760096	A	0.121324	408	0.0767745	0.0940107	0.414124	0.418507	0.0651845	1
rs3855969	1	53781916	G	0.117647	408	0.0989626	0.094618	0.295599	0.300143	0.0516482	1
rs11206170	1	53783514	G	0.362745	408	0.0751107	0.0671078	0.263032	0.267526	0.749099	1
rs941125	1	53896461	A	0.355392	408	-0.00725473	-0.068578	0.915751	0.916536	0.516643	1
rs10788961	1	53897421	G	0.0379902	408	0.0955884	0.166081	0.564918	0.568566	0.446851	1
rs4927026	1	53913431	G	0.171569	408	0.00956388	0.0843886	0.909768	0.910609	0.727626	1
rs4927033	1	53973250	A	0.120098	408	-0.0160312	-0.10084	0.873687	0.87486	0.486519	1
rs11206236	1	54127796	A	0.144608	408	0.0570842	0.0925196	0.537238	0.541054	0.689302	1
rs2284454	1	54138550	G	0.142157	408	0.0420358	0.0929451	0.651078	0.65413	0.83845	1
rs11206244	1	54148289	A	0.338235	408	0.0373743	0.0687082	0.586471	0.58998	0.582197	1
rs12094788	1	54208833	G	0.0306373	408	-0.14003	-0.174585	0.422511	0.426866	0.0481371	1
rs637590	1	54234291	A	0.375	408	-0.107156	-0.062871	0.0883112	0.0913304	0.0447514	1
rs6672989	1	54247060	G	0.378676	408	-0.123452	-0.0652696	0.0585682	0.0609695	0.752849	1
rs4927055	1	54348334	A	0.318627	408	-0.125672	-0.0647615	0.052315	0.0545594	0.0166864	1
rs6679049	1	54366851	G	0.0184275	407	0.477535	0.239965	0.0465883	0.0486784	1	0.997549
rs671539	1	54379745	G	0.158088	408	-0.0156982	-0.0857363	0.854721	0.856065	0.269467	1
rs4061073	1	54469331	G	0.3125	408	-0.133583	-0.0683735	0.050734	0.0529368	0.81777	1
rs3766431	1	54502624	A	0.468137	408	-0.0117882	-0.0630698	0.851733	0.853105	0.486964	1
rs3766430	1	54503239	G	0.469287	407	-0.00819415	-0.0632165	0.896867	0.897827	0.550267	0.997549
rs590041	1	54515059	A	0.405637	408	-0.00851397	-0.0633668	0.893118	0.894112	0.258363	1
rs587271	1	54515699	G	0.313725	408	-0.0486245	-0.069427	0.483697	0.4878	0.908411	1
rs11206327	1	54543868	A	0.0232843	408	-0.478974	-0.214502	0.0255514	0.0269624	1	1
rs12041903	1	54545022	A	0.0355392	408	-0.095419	-0.171796	0.578606	0.582166	0.402898	1
rs4927088	1	54547791	A	0.150735	408	0.123823	0.0888746	0.163548	0.167526	0.702415	1
rs4926631	1	54576823	A	0.0698529	408	-0.0214341	-0.123764	0.862505	0.86378	0.432309	1
rs12092071	1	54583558	A	0.207108	408	0.105887	0.0792485	0.181504	0.185625	1	1
rs2073109	1	54600142	A	0.435049	408	-0.0118802	-0.0634609	0.8515	0.852874	0.364498	1
rs1883783	1	54663544	A	0.395833	408	-0.0210798	-0.0641571	0.742484	0.74481	0.408185	1
rs11206355	1	54678170	G	0.145833	408	0.0324555	0.0880028	0.712276	0.714851	0.229385	1
rs12758577	1	54680741	A	0.365196	408	-0.00200652	-0.0654806	0.975554	0.975783	0.455238	1
rs10888853	1	54692047	A	0.449755	408	-0.0229048	-0.0622436	0.712883	0.715453	0.134438	1
rs7550485	1	54701081	A	0.060049	408	0.175571	0.132993	0.186785	0.190944	0.647479	1
rs4926648	1	54701533	A	0.464461	408	0.0461639	0.0630413	0.463998	0.468191	0.427083	1
rs4927133	1	54726111	A	0.25	406	-0.131688	-0.0748771	0.0786255	0.0814637	0.791859	0.995098
rs2873449	1	54731882	A	0.113971	408	0.0102263	0.101274	0.919569	0.920319	1	1
rs4060885	1	54734826	A	0.0281863	408	-0.487988	-0.172962	0.00478214	0.00519084	0.00248056	1
rs299895	1	54735036	A	0.23652	408	0.00458228	0.0753727	0.951522	0.951976	1	1
rs2133003	1	54795145	G	0.314951	408	0.105346	0.0675895	0.119088	0.122583	0.422651	1
rs12090964	1	54796439	G	0.0257353	408	-0.284809	-0.195352	0.144861	0.14866	0.232037	1
rs2060387	1	54861904	C	0.305147	408	0.0635587	0.0719851	0.377267	0.381749	0.293158	1
rs2060386	1	54861905	G	0.305147	408	0.0635587	0.0719851	0.377267	0.381749	0.293158	1
rs2117262	1	54862468	G	0.306373	408	0.072079	0.0724455	0.319766	0.324316	0.162773	1
rs7530161	1	54902316	A	0.00980392	408	-0.312658	-0.327148	0.33922	0.34376	1	1
rs501260	1	54904432	G	0.249386	407	0.0206639	0.0728759	0.776756	0.778791	0.507564	0.997549
rs11802570	1	54968496	A	0.0857843	408	0.136399	0.114154	0.232137	0.236537	1	1
rs628667	1	55021742	G	0.218137	408	0.0171276	0.077278	0.824597	0.826212	0.88457	1
rs2286202	1	55023272	G	0.0945946	407	-0.197705	-0.107223	0.0652031	0.0677593	0.386008	0.997549
rs886738	1	55034340	A	0.308824	408	-0.0367378	-0.0675785	0.586695	0.590202	0.104606	1
rs6701489	1	55131047	A	0.0870098	408	-0.130801	-0.113601	0.249564	0.254023	1	1
rs35526112	1	55163856	G	0.254902	408	0.0145461	0.0724379	0.840849	0.842319	0.515445	1
rs2317949	1	55207095	A	0.23652	408	-0.0781185	-0.0737556	0.28953	0.294067	0.41023	1
rs17111412	1	55236158	A	0.0220588	408	-0.473045	-0.207692	0.0227491	0.0240516	0.174383	1
rs2479398	1	55252662	G	0.161765	408	0.0932383	0.0883453	0.291249	0.295789	0.714285	1
rs2479394	1	55258652	G	0.297794	408	0.108505	0.0675689	0.108309	0.111652	0.192177	1
rs11206508	1	55258949	A	0.158088	408	0.130028	0.08611	0.131037	0.134682	0.460698	1
rs11206510	1	55268627	G	0.197304	408	-0.0286481	-0.0832043	0.730613	0.733037	0.274449	1
rs2495495	1	55269144	A	0.14532	406	-0.0813289	-0.0874753	0.352508	0.357033	0.10602	0.995098
chr1:55271537	1	55271537	A	0.164216	408	-0.086266	-0.0880703	0.327326	0.331874	0.588861	1
chr1:55271570	1	55271570	A	0.222637	402	0.0536539	0.0770875	0.486421	0.49051	0.773201	0.985294
chr1:55271750	1	55271750	A	0.370098	408	-0.0430185	-0.0678229	0.525899	0.529781	0.457703	1
chr1:55272107	1	55272107	C	0.0134804	408	0.502277	0.255731	0.0495204	0.0516908	0.0660034	1
rs2495488	1	55272794	A	0.067402	408	0.0505037	0.125171	0.686596	0.689376	0.413036	1
chr1:55273017	1	55273017	G	0.166667	408	-0.0921729	-0.0869444	0.289083	0.29362	0.724046	1
chr1:55273564	1	55273564	A	0.165441	408	-0.0969153	-0.0870731	0.265694	0.270194	0.857411	1
chr1:55273566	1	55273566	C	0.0208333	408	-0.0520259	-0.213971	0.807893	0.809657	0.156435	1
chr1:55274725	1	55274725	C	0.166667	408	-0.0921729	-0.0869444	0.289083	0.29362	0.724046	1
chr1:55275260	1	55275260	C	0.0686275	408	0.0473605	0.124292	0.703172	0.70582	0.422145	1
chr1:55275303	1	55275303	A	0.0675676	407	0.0635015	0.125169	0.611925	0.61526	0.413581	0.997549
rs17111503	1	55276036	G	0.248775	408	-0.0381817	-0.0729927	0.600912	0.604324	0.507239	1
rs2479408	1	55276776	C	0.209559	408	0.0586899	0.0811078	0.469309	0.473479	0.295733	1
chr1:55276989	1	55276989	A	0.00982801	407	0.503001	0.327169	0.124187	0.127747	1	0.997549
chr1:55277174	1	55277174	G	0.140931	408	0.048186	0.0930557	0.604585	0.607971	0.83783	1
rs2479409	1	55277238	G	0.340686	408	0.0182626	0.0684947	0.789756	0.791678	0.825852	1
chr1:55278035	1	55278035	A	0.140931	408	0.048186	0.0930557	0.604585	0.607971	0.83783	1
rs11591147	1	55278235	A	0.0159314	408	0.316571	0.257566	0.219039	0.223382	1	1
rs28385701	1	55278239	A	0.0122549	408	0.558479	0.292559	0.0562688	0.0586136	1	1
rs11583680	1	55278256	A	0.137255	408	0.0315405	0.0937477	0.736539	0.738914	1	1
chr1:55278320	1	55278320	A	0.0428922	408	0.0768316	0.15717	0.624952	0.628195	0.533083	1
chr1:55278392	1	55278392	A	0.0134804	408	0.502277	0.255731	0.0495204	0.0516908	0.0660034	1
chr1:55278449	1	55278449	A	0.346814	408	0.0530831	0.0704299	0.451029	0.455277	0.100686	1
chr1:55278514	1	55278514	A	0.140931	408	0.048186	0.0930557	0.604585	0.607971	0.83783	1
chr1:55278691	1	55278691	G	0.140931	408	0.048186	0.0930557	0.604585	0.607971	0.83783	1
chr1:55279944	1	55279944	C	0.0134804	408	0.502277	0.255731	0.0495204	0.0516908	0.0660034	1
chr1:55280774	1	55280774	A	0.0428922	408	0.0768316	0.15717	0.624952	0.628195	0.533083	1
chr1:55281801	1	55281801	C	0.238329	407	0.0867455	0.0743952	0.243611	0.248052	0.586709	0.997549
chr1:55281943	1	55281943	G	0.0428922	408	0.0768316	0.15717	0.624952	0.628195	0.533083	1
chr1:55281963	1	55281963	A	0.00122549	408	-1.45807	-0.916752	0.111728	0.115121	1	1
rs4927193	1	55282460	G	0.132353	408	0.0345281	0.0978261	0.724123	0.726601	0.276937	1
chr1:55282488	1	55282488	A	0.0428922	408	0.0768316	0.15717	0.624952	0.628195	0.533083	1
chr1:55282603	1	55282603	A	0.0134804	408	0.502277	0.255731	0.0495204	0.0516908	0.0660034	1
chr1:55284583	1	55284583	G	0.328431	408	0.0808176	0.0710042	0.255033	0.259508	0.144112	1
chr1:55285470	1	55285470	G	0.198529	408	0.0640482	0.0810494	0.42939	0.433721	0.876329	1
chr1:55285583	1	55285583	A	0.0428922	408	0.0768316	0.15717	0.624952	0.628195	0.533083	1
chr1:55285631	1	55285631	A	0.0441176	408	-0.178749	-0.159412	0.262158	0.266651	1	1
rs10888897	1	55285649	A	0.366422	408	0.0755643	0.0686304	0.270882	0.275393	0.241755	1
chr1:55285771	1	55285771	A	0.0220588	408	-0.0786023	-0.220768	0.72181	0.724308	1	1
chr1:55286109	1	55286109	C	0.188725	408	0.0764158	0.0829502	0.356933	0.361451	0.746559	1
rs11206514	1	55288592	C	0.367647	408	0.0736669	0.0683012	0.280784	0.285311	0.289209	1
rs572512	1	55289932	A	0.32598	408	-0.0202867	-0.0710444	0.775223	0.777271	0.26038	1
rs11800243	1	55290681	A	0.0441176	408	-0.0427101	-0.155166	0.78312	0.7851	0.554007	1
rs11806638	1	55290748	A	0.0563725	408	-0.128189	-0.139657	0.358676	0.363192	1	1
rs625619	1	55290754	G	0.459559	408	0.051923	0.0649588	0.424103	0.428453	0.842591	1
rs2483205	1	55290904	A	0.457108	408	0.015458	0.0673464	0.818457	0.820127	0.111143	1
rs2495477	1	55291055	G	0.437346	407	-0.0184094	-0.0674294	0.78484	0.786805	0.19076	0.997549
rs7552841	1	55291340	A	0.351716	408	-0.00584078	-0.069199	0.932734	0.933362	0.277514	1
rs533375	1	55295949	A	0.193627	408	-0.0234549	-0.080962	0.772044	0.774119	0.873779	1
rs584626	1	55296572	G	0.193627	408	-0.0234549	-0.080962	0.772044	0.774119	0.873779	1
rs585131	1	55296704	G	0.193627	408	-0.0234549	-0.080962	0.772044	0.774119	0.873779	1
rs540796	1	55296785	A	0.193627	408	-0.0234549	-0.080962	0.772044	0.774119	0.873779	1
rs562556	1	55296825	G	0.193627	408	-0.0234549	-0.080962	0.772044	0.774119	0.873779	1
rs483462	1	55297988	G	0.340686	408	-0.0419527	-0.0651327	0.519503	0.52342	0.0982396	1
rs630431	1	55299911	G	0.338235	408	-0.0384864	-0.0656976	0.558003	0.561694	0.183949	1
rs12067569	1	55301217	A	0.0441176	408	0.0279857	0.160102	0.861238	0.862523	1	1
rs505151	1	55301775	G	0.0477941	408	-0.00356638	-0.15449	0.981583	0.981755	0.614068	1
rs662145	1	55302416	G	0.275184	407	-0.0327723	-0.0711915	0.645272	0.648367	0.619001	0.997549
rs11583974	1	55324306	A	0.0526961	408	-0.0911682	-0.143859	0.526255	0.530134	1	1
rs2274539	1	55336614	G	0.057598	408	-0.154611	-0.141783	0.275503	0.280022	0.384265	1
rs11585666	1	55375232	C	0.178922	408	-0.028197	-0.0831929	0.734658	0.737049	0.736611	1
rs1475701	1	55411134	G	0.0477941	408	-0.00356638	-0.15449	0.981583	0.981755	0.614068	1
rs4926670	1	55435268	A	0.117647	408	0.0445651	0.0981389	0.649755	0.652817	0.476039	1
rs11206535	1	55484849	G	0.0749386	407	-0.274146	-0.121994	0.024627	0.0260028	1	0.997549
rs11206536	1	55484923	G	0.0747549	408	-0.274948	-0.121833	0.0240232	0.0253757	1	1
rs4927207	1	55486216	A	0.186275	408	-0.079733	-0.079151	0.313765	0.318316	0.139399	1
rs7551981	1	55491754	C	0.442402	408	-0.0428652	-0.0634476	0.499294	0.503319	0.422318	1
rs2802860	1	55496223	A	0.209559	408	0.0343985	0.0757274	0.649655	0.652718	0.0728924	1
rs2647281	1	55497292	G	0.057598	408	0.304156	0.141546	0.0316488	0.0332787	0.384265	1
rs6662286	1	55502915	A	0.0882353	408	0.114315	0.108183	0.290655	0.295194	0.111331	1
rs1874776	1	55516107	A	0.205882	408	0.137572	0.0810009	0.0894318	0.0924709	0.366126	1
rs11206551	1	55517554	G	0.205882	408	0.137572	0.0810009	0.0894318	0.0924709	0.366126	1
rs10888913	1	55559214	C	0.204657	408	0.0196651	0.0820985	0.810695	0.812433	0.285794	1
rs10489488	1	55565310	A	0.0196078	408	-0.166686	-0.233298	0.474932	0.479076	1	1
rs207164	1	55572358	A	0.275735	408	0.0252768	0.0705802	0.720247	0.722757	0.322527	1
rs207150	1	55579053	A	0.0931373	408	0.0598873	0.108175	0.579841	0.583393	0.37487	1
rs207145	1	55580731	G	0.113971	408	0.0332854	0.100088	0.739465	0.741816	0.629765	1
rs207127	1	55588172	G	0.101716	408	0.0457044	0.103698	0.659396	0.662385	0.286234	1
rs12068546	1	55612917	A	0.0343137	408	-0.165861	-0.17264	0.336685	0.341227	0.3809	1
rs767078	1	55623144	A	0.32598	408	-0.00618309	-0.0662103	0.925597	0.926292	0.142947	1
rs12065953	1	55666027	A	0.0232843	408	0.168885	0.21588	0.434033	0.438348	1	1
rs1998013	1	55730618	A	0.00735294	408	1.00419	0.373691	0.00720514	0.00776643	1	1
rs2748704	1	55731463	C	0.154412	408	0.0653632	0.0885145	0.460244	0.464453	0.850961	1
rs17416166	1	55739420	A	0.0294118	408	-0.117845	-0.192562	0.540547	0.544344	1	1
rs904610	1	55762002	A	0.251225	408	-0.0747385	-0.0723341	0.301492	0.306039	0.429146	1
rs1913446	1	55833719	A	0.373775	408	0.065014	0.0665076	0.328301	0.332848	0.915778	1
rs12566360	1	55933683	A	0.238971	408	-0.0605892	-0.0784853	0.440125	0.444417	0.102378	1
rs1165479	1	55940980	A	0.126225	408	0.0662223	0.0993225	0.504938	0.508933	0.368355	1
rs1165517	1	56004943	G	0.449755	408	0.0272028	0.0669808	0.684649	0.687444	0.16113	1
rs12066643	1	56012866	A	0.0967742	403	0.111743	0.106435	0.29378	0.298322	0.401946	0.987745
rs1926908	1	56017535	A	0.112745	408	-0.047227	-0.102156	0.643863	0.646968	1	1
rs6684261	1	56132257	G	0.256127	408	0.0570701	0.0710603	0.421904	0.426261	0.193057	1
rs11206690	1	56179815	G	0.186275	408	-0.033368	-0.0818212	0.683409	0.686214	0.745343	1
rs7553801	1	56199988	A	0.0490196	408	0.353491	0.144036	0.0141202	0.0150481	0.247034	1
rs6658481	1	56206821	A	0.344363	408	0.10731	0.0685334	0.117393	0.120864	0.511106	1
rs12026754	1	56285401	A	0.0269608	408	0.363124	0.201221	0.0711371	0.0738228	1	1
rs12133795	1	56364805	C	0.281863	408	-0.00597688	-0.0706188	0.932551	0.933181	0.713881	1
rs4926709	1	56367451	C	0.257353	408	0.0646034	0.0756714	0.393251	0.397695	0.243117	1
rs778125	1	56378334	G	0.280637	408	-0.00504907	-0.0710322	0.943333	0.943862	0.807209	1
rs6694549	1	56468801	A	0.243873	408	0.0525959	0.0734264	0.473802	0.477951	0.501515	1
rs2793683	1	56534137	A	0.192402	408	-0.0092151	-0.0820605	0.910588	0.911422	0.873334	1
rs9436538	1	56538199	A	0.216912	408	0.0161991	0.0790248	0.837582	0.839081	0.661458	1
rs3005911	1	56567553	A	0.348039	408	0.0325815	0.0668645	0.626062	0.629298	0.74373	1
rs2994560	1	56568413	G	0.35049	408	0.0379044	0.0666344	0.569463	0.573083	0.665019	1
rs7556596	1	56572500	G	0.384804	408	0.0442658	0.0667136	0.506998	0.510982	0.675951	1
rs17113792	1	56601984	G	0.0882353	408	0.06329	0.110915	0.56826	0.571887	0.224918	1
rs6666317	1	56677473	A	0.230392	408	0.0100214	0.0731159	0.890982	0.891996	0.0925986	1
chr1:56678946	1	56678946	G	0.067402	408	-0.0961065	-0.122763	0.433708	0.438024	0.0984601	1
chr1:56679324	1	56679324	A	0.151961	408	0.0161649	0.0865369	0.851819	0.85319	0.177345	1
chr1:56679375	1	56679375	G	0.199755	408	0.0253018	0.0741125	0.732804	0.735211	0.000543033	1
chr1:56680016	1	56680016	G	0.0196078	408	-0.176246	-0.23373	0.450814	0.455063	1	1
chr1:56680151	1	56680151	A	0.45086	407	0.112377	0.0638111	0.078223	0.0810532	0.841287	0.997549
chr1:56680268	1	56680268	A	0.0857843	408	-0.0315812	-0.109668	0.773368	0.775432	0.101661	1
chr1:56681082	1	56681082	A	0.0857843	408	-0.0315812	-0.109668	0.773368	0.775432	0.101661	1
chr1:56681550	1	56681550	A	0.00122549	408	-0.8937	-0.919471	0.331064	0.335611	1	1
chr1:56682069	1	56682069	A	0.471814	408	0.115269	0.0644803	0.0738313	0.0765732	0.766022	1
chr1:56682138	1	56682138	A	0.311275	408	-0.100987	-0.0684606	0.140184	0.143933	0.729744	1
chr1:56683275	1	56683275	A	0.379902	408	0.054507	0.0669743	0.415731	0.420109	0.599656	1
chr1:56684451	1	56684451	A	0.382426	404	0.06237	0.0674121	0.354859	0.359381	0.59827	0.990196
chr1:56684810	1	56684810	A	0.229167	408	0.077905	0.0765458	0.308794	0.313344	1	1
chr1:56685146	1	56685146	T	0.117936	407	-0.04851	-0.100388	0.628938	0.632153	1	0.997549
chr1:56686317	1	56686317	G	0.493873	408	0.131105	0.0633333	0.0384454	0.0402963	0.766978	1
chr1:56686929	1	56686929	G	0.476658	407	-0.125282	-0.0635041	0.0485171	0.0506604	0.766098	0.997549
chr1:56687289	1	56687289	A	0.117647	408	-0.04061	-0.100288	0.685526	0.688314	1	1
chr1:56687326	1	56687326	A	0.227941	408	0.0924988	0.0765518	0.226925	0.231304	1	1
[truncated: 128,333 more rows]

## Sheet: POOLED_Cases and Controls
SNP	Chromosome	Position (Buile 36)	Minor (effective) allele	Minor allele frequency	N	Beta	SE beta	P-value	P-value (Genomic controll corrected)	P-value (hwe exact test)	SNP call rate
rs1815606	1	1130298	A	0.325589	3271	0.0046681	0.0247526	0.850414	0.853498	0.873461	0.999694
rs6603811	1	1695996	A	0.0579334	3271	0.0193418	0.0504525	0.701448	0.707384	0.146251	0.999694
rs7531583	1	1696020	A	0.217823	3271	-0.0333075	-0.028057	0.235173	0.245081	0.681718	0.999694
rs12044597	1	1698661	G	0.498625	3272	-0.0146856	-0.0232576	0.527757	0.536401	0.944249	1
rs9660180	1	1712891	A	0.494039	3271	-0.00926177	-0.0232935	0.690916	0.69704	0.833805	0.999694
rs6603803	1	1802548	G	0.497699	3259	-0.0107962	-0.0232758	0.642765	0.649711	1	0.996027
rs6688000	1	1813782	A	0.0490526	3272	0.0114134	0.0542918	0.833493	0.836917	0.350591	1
rs2803328	1	1864186	G	0.494037	3270	-0.0130662	-0.0233202	0.575277	0.583272	0.752887	0.999389
rs2803291	1	1882185	A	0.154234	3271	-0.0375222	-0.0322762	0.245018	0.254999	0.840915	0.999694
rs10910029	1	2025239	A	0.383028	3270	0.00627532	0.0237999	0.792034	0.796274	0.604444	0.999389
rs425277	1	2059032	A	0.294621	3272	0.00156297	0.025502	0.95113	0.952148	0.966451	1
rs2460002	1	2109693	A	0.316723	3271	-0.0154186	-0.0247054	0.532563	0.541145	0.196377	0.999694
rs380190	1	2132378	C	0.309058	3268	-0.0106196	-0.0251777	0.673182	0.679615	0.967326	0.998778
rs260513	1	2170384	A	0.465694	3221	0.00454002	0.0232173	0.844967	0.84816	0.272544	0.984413
rs10797416	1	2172202	G	0.399756	3272	0.00256169	0.0237437	0.914083	0.915868	0.970944	1
rs12385717	1	2174715	C	0.0602078	3272	0.0317828	0.0491276	0.517669	0.526439	0.756128	1
rs7553178	1	2194615	G	0.304401	3272	-0.0246008	-0.0255833	0.336251	0.346426	0.137415	1
rs2645091	1	2214505	A	0.130847	3271	0.0528638	0.0343084	0.123356	0.131374	0.53841	0.999694
rs1809822	1	2221455	C	0.0672722	3248	0.0151573	0.0471166	0.747681	0.75277	0.260686	0.992665
rs12080256	1	2241217	A	0.206575	3270	0.0369056	0.0284987	0.195322	0.204802	0.364599	0.999389
rs2055204	1	2270521	G	0.466229	3272	0.0144923	0.0233122	0.534164	0.542725	0.944014	1
rs2840542	1	2281540	A	0.23211	3270	-0.014443	-0.0276443	0.60135	0.608956	0.658786	0.999389
rs10910077	1	2380191	A	0.284317	3271	0.00401203	0.0255819	0.875378	0.877957	0.414349	0.999694
rs6668720	1	2410773	A	0.392726	3272	-0.0565834	-0.0236545	0.0167535	0.0191711	0.607845	1
rs2281852	1	2483476	A	0.459645	3271	-0.0403281	-0.0233763	0.0844964	0.0911822	0.80537	0.999694
rs2257763	1	2483520	A	0.464682	3242	-0.0416677	-0.0234493	0.0755808	0.0818824	0.750692	0.990831
rs11589185	1	2531587	A	0.108029	3263	0.0266104	0.0380173	0.483956	0.493119	0.12159	0.997249
rs4648360	1	2713205	A	0.458869	3270	0.00495503	0.0232703	0.831379	0.834844	0.805369	0.999389
rs7538063	1	2715812	A	0.141703	3218	0.0403664	0.0336933	0.230896	0.240768	0.771851	0.983496
rs10909880	1	2717664	A	0.461633	3258	0.00629393	0.0233083	0.787137	0.791473	0.805123	0.995721
rs1869970	1	2819411	G	0.206601	3272	-0.00352226	-0.028342	0.901096	0.903148	0.165388	1
rs4648432	1	2829617	C	0.278355	3271	-0.0161508	-0.0257109	0.529892	0.538508	0.316879	0.999694
rs2045331	1	2832130	A	0.280104	3272	-0.0186371	-0.0256445	0.46738	0.476718	0.298087	1
rs4648445	1	2880205	G	0.319113	3270	0.00967373	0.0248709	0.697307	0.703317	0.747565	0.999389
rs1138513	1	2966676	G	0.189945	3272	0.00144944	0.0297011	0.961078	0.961889	0.776375	1
rs7525173	1	2986056	C	0.474633	3272	-0.0142273	-0.0232609	0.540776	0.54925	0.944136	1
rs876740	1	3027473	A	0.367665	3272	0.0356928	0.0239111	0.135508	0.143851	0.429779	1
rs2651902	1	3064166	A	0.170131	3271	-0.0244671	-0.0309428	0.429107	0.438794	1	0.999694
rs17390062	1	3079709	G	0.083588	3272	0.0879756	0.0417138	0.034942	0.0389186	0.492368	1
rs2817138	1	3095136	A	0.131112	3272	-0.0102258	-0.034158	0.76466	0.769428	0.358059	1
rs2651912	1	3100595	A	0.320752	3272	0.0113284	0.0246614	0.645976	0.65287	0.244915	1
rs12095716	1	3107538	C	0.199267	3272	-0.0177432	-0.0288904	0.539112	0.547608	0.443062	1
rs2817148	1	3127996	G	0.0143643	3272	-0.0606851	-0.0962593	0.528411	0.537046	0.143079	1
rs10158583	1	3133928	A	0.06684	3269	-0.0148196	-0.0468476	0.751747	0.756759	0.574287	0.999083
rs1553288	1	3134605	A	0.0559633	3270	-0.00122848	-0.0513613	0.980918	0.981316	0.096073	0.999389
rs10492940	1	3187607	A	0.119499	3272	0.0117695	0.0361693	0.744877	0.750018	0.318141	1
rs4648376	1	3199491	G	0.446363	3272	-0.0136404	-0.0235477	0.562408	0.570586	0.415931	1
rs2500294	1	3199627	G	0.429248	3272	-0.0117305	-0.0237179	0.620893	0.628194	0.268744	1
rs7553849	1	3204030	A	0.212561	3272	-0.0172133	-0.028391	0.54432	0.552747	1	1
rs12743017	1	3219045	A	0.0759707	3271	-0.0377262	-0.0443621	0.395094	0.405025	0.169764	0.999694
rs2483289	1	3254050	A	0.305165	3272	-0.0040156	-0.0251695	0.873241	0.875863	0.804627	1
rs946758	1	3262923	A	0.381346	3270	-0.0215347	-0.0240833	0.371229	0.381288	0.504678	0.999389
rs2493275	1	3297894	A	0.0825407	3259	0.0365704	0.0424061	0.388475	0.398445	0.907782	0.996027
rs2493292	1	3318519	A	0.156174	3272	-0.0107277	-0.0313324	0.732061	0.73744	0.0139225	1
rs2493264	1	3343809	A	0.0756649	3271	0.018546	0.0446024	0.677552	0.683909	0.103528	0.999694
rs4431782	1	3480967	G	0.0907702	3272	-0.0453101	-0.0400566	0.257992	0.268052	0.288677	1
rs3765690	1	3554678	A	0.0586976	3271	-0.000606548	-0.0490709	0.990138	0.990344	0.344382	0.999694
rs7515164	1	3644607	A	0.0518032	3272	0.00781773	0.0524112	0.881426	0.883881	0.858838	1
rs1181871	1	3674181	A	0.458435	3272	-0.00806894	-0.0234678	0.730974	0.736374	0.503743	1
rs1175549	1	3681587	C	0.230899	3272	-0.0018037	-0.0271224	0.946978	0.948082	0.0549325	1
rs10492943	1	3755284	A	0.162744	3272	-0.00784677	-0.0310388	0.800419	0.804496	0.123287	1
rs12757243	1	3802470	A	0.0113115	3271	-0.0907565	-0.110509	0.4115	0.421322	1	0.999694
rs12046333	1	3910202	G	0.0529052	3270	0.0474671	0.0516251	0.357857	0.36797	0.48391	0.999389
rs11587331	1	3939756	G	0.4239	3272	-0.00219835	-0.0234685	0.925369	0.926921	0.829988	1
rs4378174	1	3980745	A	0.139211	3272	0.0175851	0.0333164	0.597622	0.605285	0.422038	1
rs12026862	1	3985403	G	0.0120721	3272	-0.147104	-0.104313	0.158474	0.167337	0.0795926	1
rs3856168	1	4016464	A	0.0725856	3272	0.0282001	0.0446908	0.528037	0.536677	0.795223	1
rs10799180	1	4022324	A	0.139416	3217	0.0257403	0.0341484	0.450983	0.46048	0.377768	0.983191
rs9628649	1	4031878	G	0.364914	3272	0.0360444	0.023679	0.127956	0.136101	0.0346334	1
rs6688343	1	4131617	G	0.362011	3272	0.00233735	0.0244115	0.923721	0.925307	0.2725	1
rs12402543	1	4171999	A	0.136461	3272	0.0361102	0.0335975	0.282469	0.292628	0.373105	1
rs17448695	1	4267670	A	0.0854218	3272	-0.0537097	-0.0416271	0.196961	0.206464	1	1
rs12408633	1	4280363	G	0.0472188	3272	0.0400038	0.0555762	0.471648	0.480941	0.117173	1
rs523634	1	4307845	G	0.228454	3272	0.0267486	0.0277507	0.335101	0.345277	0.728713	1
rs349413	1	4344566	C	0.27698	3271	0.0171712	0.0256742	0.503615	0.512554	0.190364	0.999694
rs1762818	1	4386470	A	0.00702934	3272	0.212441	0.139502	0.127797	0.135939	1	1
rs350173	1	4446043	A	0.0741817	3269	0.0124564	0.0447198	0.780595	0.785057	0.372382	0.999083
rs350176	1	4447090	A	0.137989	3272	-0.0276875	-0.0328979	0.4	0.4099	0.0079718	1
rs780614	1	4451539	G	0.231357	3272	0.00233512	0.0273682	0.932005	0.93342	0.43191	1
rs4480324	1	4472959	A	0.272255	3269	0.00811044	0.0259862	0.75496	0.759911	0.56608	0.999083
rs1024139	1	4540762	G	0.18154	3272	-0.0119331	-0.0301977	0.692719	0.698811	0.860053	1
rs241224	1	4541659	C	0.0533313	3272	-0.00660393	-0.0522448	0.899413	0.901499	0.301302	1
rs164780	1	4566354	G	0.280257	3272	-0.0427129	-0.0257902	0.0976878	0.104883	0.728898	1
rs6703429	1	4572615	G	0.313914	3270	-0.00680453	-0.0251367	0.786621	0.790967	0.626319	0.999389
rs6426432	1	4621067	G	0.242665	3272	-0.0185849	-0.0271096	0.492999	0.502061	1	1
rs2035454	1	4622291	G	0.300673	3271	0.0204995	0.0256906	0.424906	0.434627	0.12409	0.999694
rs10915584	1	4636316	C	0.443154	3272	-0.00234631	-0.0230131	0.918792	0.92048	0.06056	1
rs10915587	1	4646496	G	0.38324	3216	-0.0126564	-0.0238806	0.596121	0.603807	0.279376	0.982885
rs11805709	1	4747454	A	0.286522	3272	-0.00367354	-0.0256191	0.885982	0.888344	0.700523	1
rs12410445	1	4767710	C	0.0603687	3255	0.00360559	0.0489132	0.941238	0.942461	0.877749	0.994804
rs17345447	1	4836912	G	0.0669315	3272	-0.0663805	-0.0461438	0.150275	0.158966	0.327256	1
rs10915668	1	4873161	A	0.416386	3271	0.00188505	0.0235174	0.936113	0.937443	0.773617	0.999694
rs2898852	1	4886464	A	0.174969	3272	0.0231737	0.0305947	0.448785	0.458302	1	1
rs11586643	1	4888791	A	0.00580685	3272	-0.200706	-0.153306	0.190471	0.199883	1	1
rs12041887	1	4902030	G	0.0221577	3272	0.0698994	0.0787329	0.374646	0.384689	0.673528	1
rs11581023	1	4936409	A	0.154798	3272	0.0367364	0.0324252	0.257232	0.267287	0.285122	1
rs6657381	1	4938953	A	0.291565	3272	-0.0752755	-0.0256122	0.00329224	0.00400519	0.767035	1
rs6689504	1	4980293	C	0.222494	3272	-0.0875919	-0.027772	0.00161067	0.00201378	0.613391	1
rs17366825	1	5146223	A	0.051286	3266	0.0537774	0.0524906	0.305592	0.315789	0.587491	0.998166
rs16840177	1	5167643	A	0.0488998	3272	0.0793082	0.0538049	0.140483	0.148948	0.851295	1
rs10915379	1	5169100	G	0.45442	3269	0.0128942	0.0233883	0.581423	0.589328	0.860001	0.999083
rs583170	1	5234274	C	0.494344	3271	0.0174666	0.0230951	0.449476	0.458986	0.506395	0.999694
rs678476	1	5247839	A	0.469419	3270	0.0305791	0.0231042	0.18566	0.195001	0.380316	0.999389
rs12125043	1	5249200	A	0.496636	3270	0.0306355	0.022934	0.181611	0.190889	0.132703	0.999389
rs9439519	1	5264494	G	0.388906	3272	-0.00767001	-0.0237011	0.74623	0.751345	0.507983	1
rs12737164	1	5270829	C	0.0262836	3272	-0.0692002	-0.07316	0.344213	0.354369	0.726969	1
rs12040942	1	5271019	C	0.422372	3272	-0.00392362	-0.0233213	0.866393	0.869154	0.315744	1
rs12131421	1	5395213	A	0.0478301	3272	0.0281339	0.0541604	0.603444	0.611018	0.561269	1
rs6603840	1	5409485	A	0.0418704	3272	0.00718203	0.0577482	0.901024	0.903078	0.512686	1
rs10796404	1	5465256	A	0.190862	3272	0.0178167	0.0299259	0.551603	0.559931	0.174653	1
rs11260699	1	5474026	A	0.226161	3272	0.0201057	0.0280957	0.474229	0.483495	0.194112	1
rs1775403	1	5559319	G	0.391198	3272	0.032724	0.0237928	0.169015	0.17808	1	1
rs1775421	1	5564169	A	0.0686125	3272	0.0333285	0.0458793	0.46757	0.476906	0.89079	1
rs13376100	1	5578656	A	0.180832	3271	0.00497538	0.0297582	0.867218	0.869962	0.0984659	0.999694
rs707583	1	5594344	C	0.456907	3272	-0.0192629	-0.0231713	0.405789	0.415651	0.438556	1
rs1414379	1	5697261	G	0.465739	3269	0.0304923	0.0231492	0.18777	0.197142	0.3253	0.999083
rs904534	1	5700044	A	0.464231	3271	0.032701	0.0231448	0.157689	0.166536	0.325102	0.999694
rs4433399	1	5733711	A	0.135086	3272	-0.0275734	-0.0332732	0.407275	0.417127	0.0165603	1
rs11260689	1	5737485	A	0.0227689	3272	0.0040917	0.0761775	0.957164	0.958057	0.0254446	1
rs1765719	1	5828516	C	0.315098	3272	-0.032033	-0.0247895	0.196287	0.20578	0.331018	1
rs12058375	1	5879496	A	0.0921455	3272	0.0250517	0.0401377	0.532532	0.541114	0.916926	1
rs3747987	1	5888706	A	0.198655	3272	-0.0296806	-0.029222	0.309776	0.319975	0.700661	1
rs521736	1	5918139	A	0.065709	3272	-0.103039	-0.0472164	0.0290894	0.0326174	0.475245	1
rs2273042	1	6071709	A	0.106302	3269	-0.00996508	-0.0373382	0.789556	0.793845	0.268732	0.999083
rs12142108	1	6093575	A	0.314736	3271	0.00158247	0.0247348	0.948988	0.950051	0.194729	0.999694
rs11121299	1	6116605	A	0.192543	3272	0.0462209	0.0287585	0.108009	0.115559	0.00687385	1
rs4908529	1	6145470	A	0.101161	3272	-0.0347064	-0.037794	0.358459	0.36857	0.0337199	1
rs2247392	1	6180734	A	0.23915	3272	0.0482399	0.0272101	0.0762505	0.0825823	0.923506	1
rs4908864	1	6185941	A	0.263753	3272	0.0452665	0.026406	0.0864832	0.09325	0.857098	1
chr1:6190118	1	6190118	A	0.0200183	3272	-0.0959644	-0.0837868	0.252068	0.262095	0.640822	1
chr1:6194665	1	6194665	A	0.0317848	3272	-0.103259	-0.0659613	0.117479	0.125327	0.570324	1
chr1:6194724	1	6194724	G	0.368735	3272	0.0241743	0.0236979	0.307679	0.317876	0.0714658	1
chr1:6195793	1	6195793	A	0.0229218	3272	0.0601055	0.0774698	0.437834	0.447448	0.688394	1
rs709209	1	6201001	G	0.342403	3271	0.0177695	0.0242746	0.464157	0.473526	0.33183	0.999694
rs846111	1	6201957	C	0.282702	3272	0.0268893	0.0258396	0.29805	0.30824	0.863111	1
chr1:6218825	1	6218825	C	0.447264	3271	-0.0111616	-0.0231349	0.629481	0.636644	0.272986	0.999694
chr1:6223091	1	6223091	C	0.295107	3270	0.0295551	0.0252976	0.242689	0.252653	0.44925	0.999389
chr1:6223509	1	6223509	A	0.00183374	3272	-0.077408	-0.271845	0.775835	0.780389	1	1
chr1:6223654	1	6223654	G	0.00672372	3272	0.0392077	0.139433	0.778562	0.783063	0.135435	1
chr1:6223869	1	6223869	A	0.241443	3272	0.0491632	0.0269395	0.0680087	0.0739552	0.444999	1
chr1:6223888	1	6223888	C	0.0252294	3270	0.122252	0.0745581	0.101071	0.108387	0.722935	0.999389
chr1:6225970	1	6225970	A	0.0472188	3272	-0.0114033	-0.0539234	0.832519	0.835961	0.0771338	1
chr1:6226211	1	6226211	A	0.0729135	3271	-0.035032	-0.0451525	0.437832	0.447446	0.301041	0.999694
chr1:6226353	1	6226353	A	0.00626528	3272	0.0480681	0.144141	0.738773	0.744028	0.118462	1
chr1:6227640	1	6227640	G	0.370909	3269	0.0167143	0.0239524	0.485292	0.49444	0.599773	0.999083
chr1:6229276	1	6229276	T	0.0065709	3272	0.0486637	0.140951	0.729905	0.735324	0.129678	1
chr1:6229499	1	6229499	G	0.0735249	3271	-0.0514315	-0.0448096	0.25106	0.26108	0.606855	0.999694
chr1:6229842	1	6229842	A	0.245568	3272	0.0393195	0.0269617	0.144746	0.153312	0.962365	1
chr1:6229976	1	6229976	G	0.240373	3272	0.0411251	0.027129	0.129541	0.13773	0.848197	1
chr1:6231282	1	6231282	A	0.310303	3271	0.0532952	0.025189	0.0343606	0.0382944	0.713158	0.999694
chr1:6235018	1	6235018	G	0.310376	3267	0.0350376	0.0252894	0.16591	0.174917	0.487438	0.998472
chr1:6235065	1	6235065	A	0.316876	3271	0.0336014	0.0250836	0.180384	0.189643	0.627957	0.999694
chr1:6235573	1	6235573	A	0.00626528	3272	-0.0319815	-0.144142	0.824411	0.828015	0.118462	1
chr1:6235664	1	6235664	G	0.319835	3272	0.0286396	0.02509	0.253672	0.263708	0.399033	1
chr1:6236106	1	6236106	A	0.320141	3272	0.0351089	0.0250219	0.160578	0.169482	0.574034	1
chr1:6236525	1	6236525	G	0.322105	3221	0.0349276	0.0252771	0.167037	0.176065	0.33316	0.984413
chr1:6236936	1	6236936	A	0.263834	3271	0.0402509	0.0262205	0.12476	0.132818	0.558777	0.999694
chr1:6237066	1	6237066	G	0.329044	3264	0.0250905	0.0248525	0.312698	0.322897	0.691846	0.997555
chr1:6237409	1	6237409	A	0.320141	3272	0.0351089	0.0250219	0.160578	0.169482	0.574034	1
chr1:6237712	1	6237712	A	0.0307152	3272	-0.0894283	-0.0659907	0.175365	0.184541	0.0324669	1
chr1:6238804	1	6238804	A	0.319627	3271	0.0329091	0.0250726	0.189334	0.198729	0.469599	0.999694
chr1:6239601	1	6239601	A	0.325947	3272	0.0313794	0.0248918	0.20744	0.217074	0.633034	1
chr1:6239708	1	6239708	A	0.00641809	3272	-0.0400041	-0.136381	0.769272	0.773952	0.00026153	1
chr1:6239733	1	6239733	A	0.00154464	3237	0.0239603	0.271527	0.929684	0.931147	0.00693693	0.989303
chr1:6240007	1	6240007	G	0.325788	3269	0.0310895	0.0249208	0.212204	0.221892	0.604769	0.999083
chr1:6240172	1	6240172	A	0.030868	3272	-0.0133729	-0.0672152	0.842297	0.845544	1	1
chr1:6240418	1	6240418	A	0.325887	3268	0.0313326	0.0248973	0.20822	0.217863	0.661408	0.998778
chr1:6240570	1	6240570	A	0.3261	3272	0.0316735	0.0248767	0.202941	0.212521	0.661747	1
chr1:6240656	1	6240656	G	0.324071	3257	0.031051	0.0250735	0.215567	0.225292	0.447264	0.995416
rs4908874	1	6245523	A	0.345049	3272	0.0300768	0.0247268	0.223846	0.233654	0.188424	1
rs1999835	1	6272462	A	0.1096	3271	-0.013728	-0.0373884	0.71349	0.719209	0.653795	0.999694
rs4243830	1	6500458	G	0.110364	3271	0.0117069	0.0371553	0.752701	0.757695	1	0.999694
rs11811007	1	6507244	G	0.108496	3272	0.0153326	0.0372867	0.68092	0.687219	0.786137	1
rs12046884	1	6517148	A	0.108344	3272	0.0174975	0.0373622	0.639554	0.646553	0.927818	1
rs12080675	1	6549202	C	0.153583	3210	0.0149069	0.0326962	0.648447	0.655299	0.785872	0.981051
rs4908932	1	6562434	A	0.183333	3270	-0.00388544	-0.0305599	0.898828	0.900927	0.0537345	0.999389
rs6682920	1	6568454	A	0.324725	3272	0.0191319	0.0246039	0.436808	0.446431	0.338864	1
rs1556036	1	6574315	A	0.307304	3272	0.00416817	0.0251753	0.868499	0.871217	1	1
rs7521134	1	6579827	A	0.321057	3272	0.0274381	0.0248447	0.269426	0.27954	0.904241	1
rs2072948	1	6602435	A	0.321822	3272	0.0244748	0.0248774	0.325205	0.335397	0.96806	1
rs12137794	1	6628531	A	0.0886308	3272	0.0412053	0.0412375	0.317689	0.327887	0.385499	1
rs2134318	1	6720689	G	0.488386	3272	-0.00321349	-0.0227842	0.887838	0.890162	0.0190916	1
rs17441830	1	6844165	G	0.120874	3272	0.00445869	0.035283	0.89944	0.901526	0.248822	1
rs4518923	1	6959389	G	0.410605	3272	-0.0103539	-0.0233284	0.657163	0.663869	0.169855	1
rs6674104	1	6985320	A	0.0100856	3272	0.00462095	0.116884	0.968464	0.969121	1	1
rs11809898	1	7002349	A	0.117665	3272	0.0472161	0.0358715	0.188088	0.197466	0.555164	1
rs1010806	1	7076560	A	0.403088	3271	0.00716238	0.0238173	0.763627	0.768414	0.561005	0.999694
rs970973	1	7124777	A	0.438111	3272	0.0396107	0.0232459	0.0883837	0.0952264	0.434853	1
rs1894647	1	7128537	A	0.0701406	3272	0.0114769	0.0454904	0.800815	0.804884	1	1
rs17350046	1	7135594	A	0.00275061	3272	-0.0151361	-0.222056	0.945656	0.946787	1	1
rs6680365	1	7159397	A	0.401284	3272	-0.0259637	-0.0234514	0.268238	0.278346	0.244362	1
rs1304712	1	7193125	G	0.401131	3272	-0.000796005	-0.0238042	0.973324	0.97388	0.715956	1
rs17030589	1	7201363	G	0.0258489	3269	-0.0961355	-0.0724159	0.184328	0.193648	0.170765	0.999083
rs6577435	1	7274915	A	0.257488	3272	0.0372544	0.0265973	0.161309	0.170228	0.890927	1
rs2301462	1	7315181	A	0.404493	3272	-0.02457	-0.0234806	0.295379	0.305565	0.364315	1
rs4908457	1	7351773	G	0.0426345	3272	0.0384698	0.0564351	0.495451	0.504486	0.0482826	1
rs845204	1	7387873	G	0.270935	3272	0.0107184	0.0256734	0.676319	0.682698	0.0374632	1
rs7537181	1	7389892	G	0.380043	3272	-0.0085286	-0.0235616	0.717374	0.723023	0.0691989	1
rs12088178	1	7408904	G	0.382946	3272	-0.0447464	-0.0238775	0.0609311	0.0665185	0.941026	1
rs1193244	1	7437260	A	0.282549	3272	-0.0379997	-0.0256832	0.138992	0.147421	0.635235	1
rs17445205	1	7446367	A	0.0614491	3271	0.0601852	0.0479127	0.209065	0.218718	0.285574	0.999694
rs1149332	1	7451433	A	0.262378	3272	-0.0128398	-0.0262633	0.624921	0.632157	0.557053	1
rs6682687	1	7501045	A	0.275145	3271	0.0237016	0.0258486	0.359173	0.369282	0.45644	0.999694
rs4908646	1	7504580	G	0.273991	3272	0.0238741	0.0258748	0.356175	0.366295	0.455336	1
rs12723779	1	7514160	A	0.153423	3272	-0.00203848	-0.032041	0.949272	0.950329	0.500932	1
rs6577449	1	7520681	A	0.0530257	3272	0.0381845	0.0521831	0.464326	0.473694	0.599652	1
rs12407666	1	7523492	A	0.391656	3272	-0.0223415	-0.023706	0.345966	0.356117	0.607567	1
rs12058235	1	7627731	T	0.0516504	3272	0.000342712	0.0529896	0.99484	0.994947	0.472158	1
rs17027053	1	7632895	G	0.146897	3271	-0.0222385	-0.0327871	0.4976	0.50661	0.834254	0.999694
rs12144591	1	7678066	A	0.0724328	3272	0.025455	0.0447519	0.56949	0.577568	0.794527	1
rs2301488	1	7714998	A	0.492207	3272	-0.00441217	-0.0233008	0.849813	0.852909	0.753042	1
rs875994	1	7775506	G	0.175733	3272	0.0224829	0.0304915	0.460909	0.470311	0.903953	1
rs228641	1	7785486	A	0.0328545	3272	0.0358301	0.0641065	0.576219	0.5842	0.0864958	1
rs228700	1	7811739	G	0.0328545	3272	0.0358301	0.0641065	0.576219	0.5842	0.0864958	1
rs228654	1	7819815	A	0.0968826	3272	-0.0300985	-0.0392654	0.443355	0.452921	0.920477	1
rs500508	1	7850043	A	0.286675	3272	-0.000987406	-0.0253619	0.968944	0.969591	0.146139	1
rs227147	1	7877676	G	0.373547	3270	0.0229118	0.0238498	0.336717	0.346891	0.432641	0.999389
rs863171	1	7915202	A	0.460361	3267	-0.0177139	-0.0230908	0.442997	0.452567	0.307222	0.998472
rs2050198	1	8034426	C	0.221424	3272	0.00137747	0.0278916	0.960611	0.961432	0.722642	1
rs7545677	1	8088206	A	0.23533	3272	-0.0194934	-0.0272936	0.475097	0.484355	0.697838	1
rs7542367	1	8121850	G	0.14919	3271	-0.059806	-0.0325802	0.0664093	0.072277	0.945188	0.999694
rs17032305	1	8193077	G	0.0411064	3272	0.0939394	0.0581843	0.106416	0.113914	0.50083	1
rs10399665	1	8329874	G	0.412592	3272	-0.0314671	-0.0233906	0.178533	0.187761	0.312691	1
rs10779702	1	8346097	A	0.352689	3272	0.0309188	0.0242883	0.203022	0.212602	0.878314	1
rs10864360	1	8647109	G	0.357885	3272	-0.0326225	-0.0241174	0.176166	0.185355	0.594538	1
rs10864361	1	8649308	A	0.35055	3272	-0.0397842	-0.0241618	0.0996458	0.106911	0.398506	1
rs2038903	1	8839104	A	0.442525	3271	-0.0145104	-0.0234587	0.536212	0.544746	0.776783	0.999694
rs1409147	1	8927907	A	0.319988	3272	-0.000189649	-0.0250511	0.99396	0.994086	0.546784	1
rs2274327	1	8931993	A	0.392879	3272	-0.0317102	-0.0237342	0.181532	0.190809	0.826032	1
rs6577546	1	8961609	G	0.263906	3272	0.0207134	0.0266286	0.436651	0.446275	0.260666	1
rs7513804	1	8967711	G	0.421431	3271	-0.0268507	-0.0235692	0.254608	0.264649	0.857728	0.999694
rs4908803	1	8982757	G	0.317431	3270	0.0190746	0.0248529	0.442784	0.452355	0.59994	0.999389
rs6685329	1	9016716	G	0.370874	3272	0.000969383	0.023948	0.967712	0.968385	0.600091	1
rs17033225	1	9053114	A	0.0423289	3272	-0.0253528	-0.0587819	0.666248	0.6728	0.0292548	1
rs12239636	1	9078288	A	0.0181846	3272	-0.077166	-0.0855279	0.366933	0.377011	0.0908338	1
rs6577556	1	9141970	G	0.325642	3272	0.0156914	0.0248546	0.527826	0.536468	0.780537	1
rs11802925	1	9151211	G	0.0718435	3271	0.0169352	0.0450005	0.70667	0.712512	0.896169	0.999694
rs1009940	1	9200729	G	0.426192	3272	0.0423439	0.0229146	0.0646172	0.0703951	0.00474022	1
rs10489436	1	9208308	G	0.125764	3272	0.0226141	0.0353247	0.522057	0.530773	0.426101	1
rs2268175	1	9223195	G	0.390587	3272	0.0216544	0.023965	0.366216	0.376297	0.462904	1
rs2239560	1	9227318	A	0.16305	3272	0.0203984	0.0316017	0.518613	0.527372	0.653961	1
rs732950	1	9232333	A	0.384286	3271	0.0231443	0.0240089	0.335051	0.345228	0.579407	0.999694
rs9434755	1	9259349	G	0.210065	3249	0.0391985	0.0287812	0.173215	0.182354	0.597247	0.992971
rs11121371	1	9315315	G	0.163278	3246	0.0117282	0.0311064	0.706147	0.711999	0.0717307	0.992054
rs9660890	1	9420700	G	0.238386	3272	-0.0264043	-0.0271404	0.330613	0.340797	0.63022	1
rs7533271	1	9485902	G	0.199939	3271	-0.0379379	-0.0287654	0.187212	0.196577	0.274181	0.999694
rs7412149	1	9502551	A	0.497402	3272	0.00281014	0.0234409	0.904577	0.906557	0.327544	1
rs12040542	1	9514086	G	0.139059	3272	-0.0057902	-0.0338943	0.864357	0.867159	0.307312	1
rs12037667	1	9517257	C	0.138795	3271	-0.00342081	-0.0339551	0.919753	0.921421	0.272317	0.999694
rs6540991	1	9640674	G	0.322433	3272	0.0363747	0.0250122	0.145869	0.154461	0.471713	1
rs6666059	1	9645110	C	0.0826711	3272	0.030489	0.0416188	0.463816	0.473189	0.132901	1
rs1660742	1	9804552	G	0.0935208	3272	-0.00713711	-0.0399548	0.858229	0.861155	1	1
rs6699320	1	9810215	G	0.0852689	3272	-0.0198284	-0.0418447	0.635602	0.642666	0.65322	1
rs6683452	1	9952500	A	0.0893949	3272	0.0369946	0.0410437	0.367404	0.37748	0.451457	1
rs11121515	1	10048352	A	0.0655562	3272	0.0678161	0.0474301	0.152772	0.161516	0.316176	1
rs6685910	1	10118557	A	0.089039	3257	-0.0172032	-0.0400543	0.66756	0.67409	0.022486	0.995416
rs6670208	1	10175254	A	0.294163	3272	-0.0188988	-0.0250914	0.451331	0.460824	0.0701684	1
rs17396340	1	10208763	A	0.128973	3272	-0.0151088	-0.0341212	0.657911	0.664605	0.0734677	1
rs17034615	1	10234464	A	0.0510391	3272	0.0386269	0.0517378	0.455311	0.464767	0.028005	1
rs3753037	1	10278421	A	0.277965	3272	-0.035141	-0.025458	0.167478	0.176514	0.0365316	1
rs17401966	1	10308058	G	0.282243	3272	-0.033487	-0.0253594	0.186669	0.196026	0.0470818	1
rs17034775	1	10321595	A	0.0516504	3272	0.0456895	0.0514814	0.374812	0.384854	0.031355	1
rs11121543	1	10326770	A	0.0255196	3272	-0.0401091	-0.0723849	0.579505	0.587438	0.059091	1
rs12403443	1	10346575	G	0.304095	3272	-0.0138484	-0.0248003	0.576575	0.584551	0.0388287	1
rs11121552	1	10357911	A	0.281938	3272	-0.0324343	-0.0253573	0.200865	0.210419	0.0423425	1
rs17034849	1	10371183	A	0.0223105	3272	0.0747099	0.0789939	0.344267	0.354423	1	1
rs6674843	1	10380965	A	0.279951	3272	-0.0293122	-0.0254359	0.249158	0.259167	0.0510385	1
rs1889309	1	10402265	A	0.284077	3272	-0.0325199	-0.0253008	0.198676	0.208201	0.039201	1
rs585870	1	10472215	C	0.284841	3272	-0.0219748	-0.025516	0.389119	0.399085	0.323764	1
rs2506878	1	10488682	C	0.1739	3272	-0.0170332	-0.0306249	0.578081	0.586035	0.903129	1
rs616488	1	10488802	G	0.323296	3271	-0.0127526	-0.0249813	0.609713	0.617189	0.548963	0.999694
rs17412703	1	10489415	A	0.0719743	3272	0.0170316	0.0445353	0.702142	0.708066	0.293443	1
rs17035156	1	10508114	A	0.152353	3272	-0.0181749	-0.0320284	0.570401	0.578466	0.278669	1
rs12403130	1	10514818	C	0.123585	3269	0.0261945	0.034732	0.450736	0.460235	0.0526947	0.999083
rs12038548	1	10565784	A	0.122555	3272	0.011838	0.0351393	0.736202	0.741504	0.329723	1
rs12045923	1	10566416	G	0.357732	3272	0.035061	0.023924	0.14278	0.151301	0.148215	1
rs190775	1	10606270	A	0.137989	3272	0.0212081	0.0333024	0.524233	0.532921	0.211096	1
rs17035482	1	10613535	A	0.0654034	3272	0.00312981	0.046542	0.946385	0.947502	0.250983	1
rs11587145	1	10627275	A	0.13096	3272	0.00606075	0.0343858	0.860092	0.86298	0.877945	1
rs483296	1	10667710	A	0.43465	3267	-0.0486243	-0.0234647	0.0382437	0.0424566	0.943264	0.998472
rs7514663	1	10684936	A	0.0145974	3254	-0.120967	-0.0969971	0.212353	0.222043	0.501531	0.994499
rs7514751	1	10685019	A	0.300367	3271	-0.0401891	-0.0255001	0.115017	0.122789	0.479382	0.999694
rs284289	1	10686402	G	0.0327217	3270	0.0697731	0.0649086	0.2824	0.292559	0.397164	0.999389
rs12567505	1	10687970	A	0.0724549	3271	0.0797574	0.0451092	0.0770445	0.0834116	0.514278	0.999694
rs4845952	1	10689966	A	0.132488	3272	0.0794098	0.0342511	0.0204245	0.0232012	0.939341	1
rs284254	1	10708901	G	0.088478	3272	0.0705885	0.040989	0.0850455	0.0917539	1	1
rs284277	1	10713384	C	0.393185	3272	0.045785	0.023915	0.0555575	0.0608527	0.486452	1
rs880315	1	10719453	G	0.363345	3271	0.0282539	0.0243312	0.245552	0.255536	0.384806	0.999694
rs11121621	1	10770647	A	0.142268	3272	0.00291378	0.0325444	0.928659	0.930143	0.0121259	1
rs1769669	1	10795969	A	0.1875	3272	-0.03457	-0.0301195	0.251067	0.261087	0.186724	1
rs1292664	1	10827952	A	0.245874	3272	-0.0129138	-0.0270794	0.633444	0.640543	0.671546	1
rs12085982	1	10835734	G	0.2147	3272	0.0347688	0.0280518	0.215179	0.2249	0.350614	1
rs667444	1	10838094	G	0.384322	3272	-0.0144664	-0.0240823	0.548036	0.556412	0.336933	1
rs1280992	1	10844877	A	0.331449	3272	-0.00775365	-0.0244503	0.751153	0.756176	0.286928	1
rs1884429	1	11035423	A	0.224175	3272	-0.00196705	-0.0281381	0.944268	0.945428	0.268846	1
rs1194820	1	11051846	A	0.249389	3272	0.0111683	0.0269905	0.679031	0.685362	0.575255	1
rs2791653	1	11052435	A	0.225397	3272	-0.0036886	-0.0280287	0.8953	0.897471	0.367889	1
rs910660	1	11053230	A	0.249083	3272	0.0108886	0.0270125	0.686879	0.693074	0.5435	1
rs1010447	1	11192383	A	0.253362	3272	-0.000343663	-0.027039	0.989859	0.990071	0.18013	1
rs10779751	1	11206923	A	0.253439	3271	0.000850814	0.0270423	0.974901	0.975424	0.180133	0.999694
rs2295080	1	11245215	C	0.281193	3270	0.00712356	0.0261359	0.785193	0.789566	0.225712	0.999389
rs11121717	1	11278036	G	0.0322433	3272	0.031685	0.0658831	0.630568	0.637713	1	1
rs2817644	1	11570256	A	0.092383	3269	-0.0428926	-0.0403446	0.287712	0.297884	0.602862	0.999083
rs714829	1	11574497	G	0.11067	3271	-0.00936371	-0.0373848	0.802225	0.806267	0.328018	0.999694
rs12760507	1	11618904	A	0.0363692	3272	0.0364893	0.0624696	0.559144	0.567368	0.800297	1
chr1:11717263	1	11717263	A	0.115102	3271	0.0295195	0.0360729	0.413169	0.422979	0.263798	0.999694
chr1:11719611	1	11719611	A	0.413661	3272	0.000178804	0.0237113	0.993983	0.994109	0.58883	1
chr1:11719821	1	11719821	G	0.210422	3272	-0.0129229	-0.028012	0.644559	0.651476	0.0455588	1
chr1:11721322	1	11721322	T	0.310761	3271	0.00289694	0.0252418	0.908629	0.910527	0.540442	0.999694
chr1:11721815	1	11721815	A	0.328034	3271	-0.00722719	-0.0242989	0.766139	0.770879	0.0322506	0.999694
chr1:11722635	1	11722635	A	0.153576	3272	-0.0165141	-0.0317507	0.602981	0.610562	0.0923571	1
chr1:11723065	1	11723065	C	0.365373	3272	0.0131437	0.024164	0.586486	0.594316	0.850538	1
rs4073395	1	11723290	A	0.31443	3271	0.00130195	0.0251769	0.958758	0.959617	0.516469	0.999694
chr1:11723610	1	11723610	G	0.168094	3269	-0.000651162	-0.03064	0.983045	0.983398	0.0911891	0.999083
chr1:11723674	1	11723674	A	0.311678	3271	-0.00365	-0.0252371	0.885004	0.887386	0.488659	0.999694
chr1:11724004	1	11724004	G	0.00198655	3272	0.137828	0.261274	0.597832	0.605492	1	1
chr1:11724229	1	11724229	A	0.355746	3272	0.00902149	0.0243105	0.710567	0.716339	0.848758	1
chr1:11725021	1	11725021	C	0.327064	3270	-0.00604903	-0.0243367	0.803704	0.807717	0.0388131	0.999389
chr1:11725538	1	11725538	C	0.315041	3271	-0.0068645	-0.0251791	0.78514	0.789514	0.465807	0.999694
chr1:11727177	1	11727177	C	0.0906174	3272	0.0147637	0.040096	0.712717	0.718451	0.287623	1
chr1:11729438	1	11729438	C	0.154187	3272	-0.0190606	-0.0317602	0.548412	0.556783	0.13999	1
chr1:11730013	1	11730013	G	0.3262	3271	-0.012047	-0.0243826	0.621249	0.628544	0.0563304	0.999694
chr1:11730557	1	11730557	G	0.169673	3271	-0.000214021	-0.0304111	0.994385	0.994502	0.0403706	0.999694
chr1:11731748	1	11731748	A	0.160863	3245	-0.0143376	-0.0318104	0.65219	0.65898	0.745189	0.991748
chr1:11732322	1	11732322	A	0.48609	3271	-0.00473859	-0.0233344	0.839078	0.842389	0.70029	0.999694
chr1:11732387	1	11732387	A	0.00152812	3272	0.341741	0.297604	0.250842	0.26086	1	1
chr1:11732432	1	11732432	G	0.316023	3264	-0.00519741	-0.0251742	0.836433	0.839798	0.543639	0.997555
chr1:11733092	1	11733092	A	0.149083	3270	-0.00997866	-0.0320838	0.755786	0.760722	0.0533001	0.999389
chr1:11733560	1	11733560	A	0.353976	3270	0.00815411	0.0243289	0.737504	0.742782	0.90872	0.999389
rs4075033	1	11733821	G	0.327934	3272	-0.00794669	-0.0247921	0.748564	0.753636	0.842837	1
chr1:11733860	1	11733860	C	0.169214	3271	-0.00212381	-0.0304264	0.944352	0.94551	0.034287	0.999694
chr1:11733870	1	11733870	G	0.316723	3271	-0.00332115	-0.0251153	0.894798	0.896979	0.544503	0.999694
chr1:11734371	1	11734371	A	0.156881	3270	-0.00830467	-0.031537	0.792296	0.796531	0.128427	0.999389
chr1:11735282	1	11735282	A	0.0158924	3272	0.0534239	0.0918856	0.560959	0.569158	0.196787	1
chr1:11735428	1	11735428	A	0.00137531	3272	0.419913	0.313597	0.180565	0.189826	1	1
chr1:11736371	1	11736371	C	0.157396	3272	-0.00685496	-0.0315146	0.827805	0.831342	0.147278	1
chr1:11737218	1	11737218	G	0.31657	3271	-0.0047176	-0.0251305	0.851093	0.854163	0.492259	0.999694
chr1:11737951	1	11737951	A	0.152858	3271	-0.0143111	-0.0318956	0.653659	0.660424	0.156131	0.999694
chr1:11741330	1	11741330	A	0.0183542	3269	-0.0234519	-0.087442	0.788546	0.792854	0.627423	0.999083
chr1:11745182	1	11745182	A	0.148686	3272	-0.00335676	-0.032165	0.916883	0.91861	0.0840556	1
chr1:11745321	1	11745321	A	0.253303	3255	0.0229563	0.0265395	0.387047	0.397025	0.307978	0.994804
chr1:11745743	1	11745743	G	0.318001	3272	-0.0166613	-0.0248991	0.503398	0.51234	0.808927	1
chr1:11746720	1	11746720	A	0.341534	3272	0.046723	0.0243004	0.0545139	0.0597502	0.392445	1
chr1:11746890	1	11746890	A	0.334456	3265	0.0370557	0.02477	0.134655	0.142977	0.582266	0.997861
chr1:11746933	1	11746933	G	0.339395	3272	0.0357296	0.024646	0.147139	0.155759	0.612322	1
chr1:11747143	1	11747143	A	0.337408	3272	0.0343074	0.0246256	0.163571	0.172534	0.814528	1
chr1:11747162	1	11747162	A	0.282177	3271	0.0260168	0.0257766	0.312822	0.32302	0.829164	0.999694
chr1:11747165	1	11747165	G	0.337768	3270	0.0382258	0.0246515	0.120986	0.128937	0.724968	0.999389
chr1:11747208	1	11747208	A	0.337103	3272	0.0362436	0.0246687	0.141775	0.150271	0.667079	1
chr1:11747722	1	11747722	A	0.00168093	3272	0.22192	0.283749	0.434156	0.443802	1	1
chr1:11748131	1	11748131	G	0.0898533	3272	0.0251196	0.0409558	0.539656	0.548145	0.392879	1
chr1:11748229	1	11748229	C	0.318307	3272	0.0205713	0.0249674	0.409982	0.419815	0.935786	1
chr1:11748438	1	11748438	C	0.318098	3249	0.0200662	0.0249418	0.421097	0.430848	0.871487	0.992971
chr1:11748672	1	11748672	A	0.0415648	3272	-0.0419798	-0.0581131	0.47006	0.47937	0.824974	1
chr1:11750825	1	11750825	G	0.316764	3269	0.0129479	0.0249726	0.60412	0.611683	0.935608	0.999083
chr1:11750906	1	11750906	G	0.316932	3272	0.0128126	0.02497	0.607869	0.615375	0.967815	1
chr1:11752756	1	11752756	G	0.108608	3241	0.0182907	0.0374833	0.625571	0.632797	0.856179	0.990526
chr1:11752767	1	11752767	T	0.134816	3260	0.0594625	0.0339935	0.0802515	0.0867587	0.764258	0.996333
chr1:11754182	1	11754182	A	0.0562347	3272	0.0847314	0.0507585	0.0950568	0.102155	0.619019	1
chr1:11754202	1	11754202	G	0.288444	3271	0.0257302	0.0255338	0.313602	0.323801	0.55122	0.999694
chr1:11754462	1	11754462	G	0.104829	3272	0.0214645	0.0378468	0.570617	0.578679	0.852037	1
chr1:11754687	1	11754687	A	0.385324	3257	0.0294141	0.0239111	0.218643	0.228401	0.91168	0.995416
chr1:11754876	1	11754876	A	0.183124	3271	0.00517719	0.0298946	0.862508	0.865348	0.520712	0.999694
chr1:11755210	1	11755210	C	0.0540748	3264	0.0791988	0.0529765	0.13492	0.143248	9.16274e-05	0.997555
chr1:11755246	1	11755246	G	0.18368	3272	0.00809846	0.0298133	0.785899	0.790259	0.448426	1
chr1:11755953	1	11755953	A	0.385203	3271	0.0326371	0.0238677	0.171494	0.180602	0.970554	0.999694
chr1:11756078	1	11756078	G	0.385417	3264	0.0321595	0.0239074	0.178571	0.1878	1	0.997555
chr1:11756443	1	11756443	A	0.104829	3272	0.0214645	0.0378468	0.570617	0.578679	0.852037	1
chr1:11756497	1	11756497	A	0.38505	3271	0.0326517	0.0238812	0.171545	0.180655	1	0.999694
chr1:11757041	1	11757041	G	0.385391	3272	0.0324144	0.0238631	0.174352	0.18351	0.941179	1
chr1:11757352	1	11757352	A	0.280667	3269	0.0294655	0.0258194	0.25378	0.263816	0.761795	0.999083
chr1:11758042	1	11758042	C	0.104829	3272	0.0254119	0.0378461	0.501932	0.510891	0.852037	1
chr1:11758143	1	11758143	A	0.104708	3271	0.0252546	0.0378711	0.504863	0.513788	0.85184	0.999694
chr1:11758522	1	11758522	A	0.28041	3272	0.0288427	0.0258038	0.263665	0.273753	0.76169	1
chr1:11759037	1	11759037	G	0.183833	3272	0.0112073	0.0298107	0.706956	0.712793	0.448998	1
chr1:11759215	1	11759215	A	0.28019	3271	0.0281345	0.0258255	0.275975	0.286114	0.794787	0.999694
chr1:11759257	1	11759257	A	0.104829	3272	0.0254119	0.0378461	0.501932	0.510891	0.852037	1
chr1:11759269	1	11759269	G	0.385544	3272	0.0340879	0.0238814	0.153469	0.162228	1	1
chr1:11759455	1	11759455	A	0.28041	3272	0.0288427	0.0258038	0.263665	0.273753	0.76169	1
chr1:11759635	1	11759635	C	0.280257	3272	0.027783	0.0258025	0.281589	0.291745	0.728898	1
chr1:11760292	1	11760292	A	0.385321	3270	0.0354716	0.0238838	0.137498	0.145891	0.97056	0.999389
chr1:11760345	1	11760345	C	0.0640281	3272	0.0773368	0.0481266	0.108066	0.115618	0.142567	1
chr1:11760598	1	11760598	A	0.280648	3271	0.0281972	0.0258107	0.27463	0.284764	0.761937	0.999694
chr1:11760686	1	11760686	A	0.280275	3270	0.0285219	0.0258291	0.269483	0.279597	0.79481	0.999389
chr1:11760965	1	11760965	G	0.104708	3271	0.0239637	0.0379298	0.527524	0.53617	1	0.999694
chr1:11761038	1	11761038	A	0.104676	3272	0.0237302	0.0379259	0.531512	0.540108	0.925902	1
chr1:11761103	1	11761103	A	0.104676	3272	0.0237302	0.0379259	0.531512	0.540108	0.925902	1
chr1:11761143	1	11761143	C	0.0637615	3270	0.0760029	0.0482309	0.115069	0.122843	0.142046	0.999389
chr1:11761283	1	11761283	G	0.105525	3222	0.0229522	0.0380322	0.54618	0.554582	1	0.984719
chr1:11761349	1	11761349	A	0.0642047	3263	0.0428329	0.0467705	0.359766	0.369873	0.108221	0.997249
chr1:11761428	1	11761428	G	0.104676	3272	0.0237302	0.0379259	0.531512	0.540108	0.925902	1
chr1:11761596	1	11761596	A	0.104676	3272	0.0237302	0.0379259	0.531512	0.540108	0.925902	1
chr1:11761795	1	11761795	A	0.0637225	3272	0.0717067	0.0482231	0.137021	0.145402	0.142037	1
chr1:11761813	1	11761813	G	0.063628	3269	0.0458433	0.0468934	0.328269	0.338457	0.103862	0.999083
chr1:11762379	1	11762379	G	0.104676	3272	0.0237302	0.0379259	0.531512	0.540108	0.925902	1
chr1:11762510	1	11762510	A	0.137129	3267	0.0228499	0.0338114	0.499165	0.508156	1	0.998472
rs4846044	1	11762585	A	0.0333024	3228	0.00148595	0.0647498	0.981691	0.982073	0.404366	0.986553
chr1:11762967	1	11762967	A	0.38478	3272	0.0351433	0.023906	0.141544	0.150035	0.941133	1
chr1:11763054	1	11763054	A	0.0634169	3272	0.0758536	0.0483151	0.116421	0.124236	0.142062	1
chr1:11763070	1	11763070	C	0.0659829	3266	0.0591285	0.0459895	0.19855	0.208073	0.0324986	0.998166
chr1:11763449	1	11763449	G	0.280257	3272	0.0302251	0.0258026	0.241439	0.251395	0.728898	1
chr1:11763567	1	11763567	A	0.104829	3272	0.0234383	0.0379081	0.536383	0.544915	1	1
chr1:11764276	1	11764276	A	0.184058	3268	0.0116012	0.0298023	0.697076	0.70309	0.382894	0.998778
chr1:11764731	1	11764731	G	0.385086	3272	0.0342676	0.0238985	0.151606	0.160326	0.941174	1
chr1:11765078	1	11765078	A	0.183736	3271	0.0104377	0.0298203	0.726323	0.731808	0.4485	0.999694
chr1:11765811	1	11765811	A	0.0394254	3272	-0.0178757	-0.0597133	0.764667	0.769434	1	1
chr1:11766219	1	11766219	C	0.287462	3270	0.0281753	0.025501	0.269215	0.279328	0.417259	0.999389
chr1:11766270	1	11766270	A	0.104676	3272	0.0225652	0.0379882	0.552508	0.560824	1	1
chr1:11766427	1	11766427	A	0.0634169	3272	0.075189	0.0483148	0.119653	0.127565	0.142062	1
chr1:11766801	1	11766801	A	0.192343	3265	0.00660637	0.0292756	0.821465	0.825128	0.367278	0.997861
chr1:11767324	1	11767324	G	0.104676	3272	0.0225652	0.0379882	0.552508	0.560824	1	1
chr1:11768111	1	11768111	A	0.104555	3271	0.0243191	0.0380013	0.522201	0.530915	1	0.999694
chr1:11770023	1	11770023	G	0.0637225	3272	0.0771625	0.0482246	0.109584	0.117186	0.142037	1
chr1:11770346	1	11770346	G	0.390892	3272	0.0259697	0.0235712	0.270567	0.280685	0.240156	1
chr1:11770448	1	11770448	A	0.104523	3272	0.0216138	0.0380065	0.569568	0.577645	1	1
chr1:11770489	1	11770489	A	0.104676	3272	0.0215119	0.0379885	0.571208	0.579261	1	1
rs1537514	1	11770655	C	0.104676	3272	0.0225652	0.0379882	0.552508	0.560824	1	1
chr1:11770726	1	11770726	A	0.193154	3272	0.0125362	0.0292414	0.668132	0.674652	0.432495	1
chr1:11770730	1	11770730	A	0.00458435	3272	0.141121	0.172341	0.412875	0.422688	1	1
chr1:11772952	1	11772952	A	0.335422	3272	0.00577995	0.0247147	0.815088	0.818877	0.666199	1
chr1:11773514	1	11773514	A	0.0403423	3272	-0.0142241	-0.0586493	0.808371	0.812292	0.371005	1
chr1:11773590	1	11773590	C	0.295719	3270	0.0167242	0.0253957	0.510189	0.519051	0.737018	0.999389
chr1:11773772	1	11773772	A	0.0450795	3272	0.0669305	0.0567679	0.238391	0.248323	0.216791	1
chr1:11774697	1	11774697	A	0.104676	3272	0.0225652	0.0379882	0.552508	0.560824	1	1
chr1:11774887	1	11774887	A	0.287592	3272	0.0175845	0.0255866	0.491922	0.500996	0.701165	1
chr1:11775485	1	11775485	C	0.0250611	3272	-0.0475758	-0.0743435	0.522208	0.530921	1	1
rs1801131	1	11777063	C	0.329615	3272	0.0212755	0.0249707	0.394203	0.404139	0.267997	1
chr1:11777258	1	11777258	A	0.26467	3272	0.031661	0.0263589	0.229693	0.239555	0.964172	1
chr1:11777342	1	11777342	G	0.401742	3272	0.0171058	0.0237666	0.471685	0.480978	0.799037	1
chr1:11778454	1	11778454	G	0.395477	3272	0.0224655	0.0237643	0.34448	0.354636	1	1
chr1:11778484	1	11778484	C	0.0594438	3272	0.0689845	0.0497857	0.16586	0.174866	0.207977	1
chr1:11778965	1	11778965	A	0.293335	3271	0.00334674	0.025491	0.895545	0.897711	0.833013	0.999694
rs17421462	1	11779434	A	0.0594438	3272	0.0687493	0.0497835	0.16729	0.176322	0.207977	1
rs1572151	1	11780298	G	0.0632641	3272	0.0609247	0.0481326	0.205596	0.215208	0.459645	1
chr1:11780375	1	11780375	A	0.183833	3272	0.00597719	0.0298134	0.8411	0.844371	0.448998	1
chr1:11780538	1	11780538	A	0.401436	3272	0.019337	0.0236975	0.414504	0.424304	0.970981	1
chr1:11780911	1	11780911	A	0.104065	3272	0.0224997	0.0380612	0.554423	0.562712	1	1
chr1:11781137	1	11781137	A	0.182416	3270	0.00255251	0.0300113	0.93222	0.933631	0.724931	0.999389
chr1:11781171	1	11781171	G	0.0474006	3270	-0.0353693	-0.0546207	0.51728	0.526055	0.699869	0.999389
chr1:11781977	1	11781977	G	0.0472188	3272	-0.0303537	-0.0546853	0.578852	0.586795	0.697993	1
chr1:11782193	1	11782193	C	0.0472188	3272	-0.0303537	-0.0546853	0.578852	0.586795	0.697993	1
chr1:11782223	1	11782223	A	0.0472188	3272	-0.0303537	-0.0546853	0.578852	0.586795	0.697993	1
chr1:11782704	1	11782704	G	0.10437	3272	0.0205944	0.0380251	0.588094	0.5959	1	1
chr1:11782707	1	11782707	A	0.245491	3271	0.0120234	0.0268713	0.654553	0.661303	0.57137	0.999694
chr1:11783045	1	11783045	A	0.182763	3272	-0.00370987	-0.0298977	0.901248	0.903297	0.51958	1
rs13306567	1	11783052	C	0.0472188	3272	-0.0303537	-0.0546853	0.578852	0.586795	0.697993	1
chr1:11783270	1	11783270	A	0.245874	3272	0.0134037	0.0268215	0.61726	0.624618	0.509206	1
chr1:11783430	1	11783430	A	0.151636	3271	0.00620813	0.0325529	0.848754	0.851871	0.634105	0.999694
rs17037397	1	11784750	A	0.0400367	3272	-0.0125818	-0.0588442	0.830691	0.83417	0.36389	1
chr1:11784801	1	11784801	G	0.281326	3272	-0.031615	-0.0260871	0.225549	0.235374	0.279749	1
rs17367504	1	11785365	G	0.148991	3272	-0.00148733	-0.0326925	0.963713	0.964469	0.890309	1
chr1:11785644	1	11785644	A	0.101467	3272	0.0138393	0.0384431	0.718852	0.724474	0.923655	1
chr1:11787823	1	11787823	A	0.102203	3268	0.00973577	0.0381824	0.798738	0.802848	0.567405	0.998778
chr1:11788129	1	11788129	C	0.102294	3270	0.00951465	0.0381602	0.803102	0.807127	0.568226	0.999389
chr1:11788391	1	11788391	G	0.14945	3272	-0.000797161	-0.03255	0.980461	0.980869	0.89063	1
chr1:11788770	1	11788770	A	0.0463444	3269	-0.0229682	-0.0551436	0.677033	0.683399	0.689671	0.999083
chr1:11789038	1	11789038	A	0.0400367	3272	-0.0125818	-0.0588442	0.830691	0.83417	0.36389	1
chr1:11789631	1	11789631	A	0.258252	3272	0.0169902	0.0263675	0.519341	0.52809	0.437828	1
chr1:11789767	1	11789767	C	0.00213936	3272	-0.1876	-0.251629	0.455943	0.465393	1	1
chr1:11790239	1	11790239	C	0.0317848	3272	0.0143855	0.0660432	0.82757	0.831111	0.570324	1
chr1:11790465	1	11790465	A	0.0317848	3272	0.0143855	0.0660432	0.82757	0.831111	0.570324	1
chr1:11791098	1	11791098	G	0.102384	3272	0.0103105	0.0381398	0.786903	0.791244	0.569135	1
chr1:11791817	1	11791817	G	0.392693	3271	0.0206253	0.0237809	0.385775	0.39576	0.912443	0.999694
chr1:11792102	1	11792102	C	0.258331	3271	0.0170383	0.0263738	0.51826	0.527023	0.437866	0.999694
chr1:11792165	1	11792165	A	0.257971	3262	0.019625	0.0263832	0.45697	0.46641	0.41061	0.996944
chr1:11792440	1	11792440	G	0.102384	3272	0.0103105	0.0381398	0.786903	0.791244	0.569135	1
chr1:11792720	1	11792720	G	0.102384	3272	0.0103105	0.0381398	0.786903	0.791244	0.569135	1
chr1:11792828	1	11792828	G	0.0695293	3272	-0.00611385	-0.0459854	0.894231	0.896425	0.587426	1
chr1:11792866	1	11792866	G	0.0510391	3272	-0.0651835	-0.0533661	0.221919	0.231709	0.276035	1
rs17037425	1	11792970	A	0.134221	3267	0.0131448	0.0339307	0.698459	0.704449	0.546708	0.998472
chr1:11793318	1	11793318	A	0.103299	3243	0.0120376	0.0382223	0.75281	0.757802	0.635455	0.991137
chr1:11793700	1	11793700	A	0.102081	3267	0.0122219	0.0382007	0.749015	0.754078	0.566597	0.998472
chr1:11793853	1	11793853	A	0.102262	3271	0.0104886	0.0381652	0.783454	0.787861	0.568123	0.999694
chr1:11794362	1	11794362	G	0.102446	3270	0.0100828	0.0381387	0.791494	0.795745	0.569368	0.999389
chr1:11794907	1	11794907	G	0.102537	3272	0.0112792	0.0381211	0.767324	0.77204	0.634328	1
chr1:11794982	1	11794982	G	0.102262	3271	0.00889936	0.0381583	0.815589	0.819367	0.568123	0.999694
chr1:11795243	1	11795243	A	0.101503	3261	0.00910135	0.0383059	0.812194	0.81604	0.501434	0.996638
chr1:11795407	1	11795407	A	0.0467604	3272	-0.0244867	-0.054901	0.655585	0.662318	0.69336	1
chr1:11795607	1	11795607	G	0.102415	3271	0.0105158	0.0381447	0.782792	0.787211	0.569251	0.999694
chr1:11795642	1	11795642	A	0.102384	3272	0.0103105	0.0381398	0.786903	0.791244	0.569135	1
chr1:11796374	1	11796374	G	0.149297	3272	-0.000383945	-0.0325573	0.990591	0.990787	0.890477	1
chr1:11796438	1	11796438	G	0.409994	3272	0.0119505	0.0235749	0.612213	0.619651	0.772586	1
chr1:11796456	1	11796456	C	0.406845	3258	0.0182955	0.0237034	0.440201	0.449795	0.971044	0.995721
chr1:11796741	1	11796741	C	0.102384	3272	0.0103105	0.0381398	0.786903	0.791244	0.569135	1
chr1:11796776	1	11796776	A	0.102384	3272	0.0103105	0.0381398	0.786903	0.791244	0.569135	1
chr1:11799004	1	11799004	G	0.407673	3271	0.0147136	0.023652	0.533884	0.542448	0.971137	0.999694
chr1:11799249	1	11799249	A	0.0623472	3272	0.0237114	0.047026	0.614107	0.621515	0.0231231	1
chr1:11799649	1	11799649	A	0.0467604	3272	-0.0244867	-0.054901	0.655585	0.662318	0.69336	1
chr1:11799718	1	11799718	T	0.0467604	3272	-0.0244867	-0.054901	0.655585	0.662318	0.69336	1
chr1:11800233	1	11800233	A	0.0467604	3272	-0.0244867	-0.054901	0.655585	0.662318	0.69336	1
chr1:11800566	1	11800566	C	0.0467604	3272	-0.0244867	-0.054901	0.655585	0.662318	0.69336	1
chr1:11800813	1	11800813	A	0.0464832	3270	-0.0213579	-0.0550664	0.698121	0.704117	0.690819	0.999389
chr1:11801206	1	11801206	G	0.102384	3272	0.0103105	0.0381398	0.786903	0.791244	0.569135	1
chr1:11801653	1	11801653	C	0.0467604	3272	-0.0244867	-0.054901	0.655585	0.662318	0.69336	1
chr1:11801690	1	11801690	G	0.0467747	3271	-0.0247267	-0.0548995	0.652422	0.659208	0.693424	0.999694
chr1:11801947	1	11801947	A	0.102384	3272	0.0103105	0.0381398	0.786903	0.791244	0.569135	1
chr1:11802055	1	11802055	A	0.0467604	3272	-0.0244867	-0.054901	0.655585	0.662318	0.69336	1
chr1:11802272	1	11802272	A	0.401284	3272	0.0141424	0.0237233	0.551082	0.559418	0.970981	1
chr1:11803907	1	11803907	G	0.257121	3265	0.0193201	0.026389	0.464092	0.473462	0.359511	0.997861
[truncated: 129,833 more rows]
